# Supplementary material for: JNK pathway suppression drives resistance to combination endocrine therapy and CDK4/6 inhibition in ER+ breast cancer
Source: bioRxiv preprint, doi:10.1101/2025.01.08.631992, version 1 (2025-01-09)
Supplement: Supplementary Table 4 [file 631992_file07.xlsx]

## Sheet: Supp4a - MCF-7 normalised CPM
	MCF7_pLenti_VEHICLE_rep1	MCF7_pLenti_VEHICLE_rep2	MCF7_pLenti_VEHICLE_rep3	MCF7_pLenti_TAM+PALB_rep1	MCF7_pLenti_TAM+PALB_rep2	MCF7_pLenti_TAM+PALB_rep3	MCF7_pLenti_FAS+PALB_rep1	MCF7_pLenti_FAS+PALB_rep2	MCF7_pLenti_FAS+PALB_rep3	MCF7_MKK7_3_VEHICLE_rep1	MCF7_MKK7_3_VEHICLE_rep2	MCF7_MKK7_3_VEHICLE_rep3	MCF7_MKK7_3_TAM+PALB_rep1	MCF7_MKK7_3_TAM+PALB_rep2	MCF7_MKK7_3_TAM+PALB_rep3	MCF7_MKK7_3_FAS+PALB_rep1	MCF7_MKK7_3_FAS+PALB_rep2	MCF7_MKK7_3_FAS+PALB_rep3
GeneID	FD02632497	FD02632534	FD02632634	FD02632502	FD02632535	FD02632645	FD02632507	FD02632605	FD02632651	FD02632518	FD02632606	FD02632660	FD02632520	FD02632608	FD02632784	FD02632522	FD02632618	FD02632876
MIR1302-2HG	0.224034	0.45787	0.417684	0.744393	0.938506	1.30155	1.69939	1.71873	1.21853	0.649919	0.498032	0.292403	2.2713	1.09865	1.76113	2.02683	1.92235	1.61266
LINC01128	12.3779	12.7288	10.7554	7.76296	7.88345	8.94816	16.1973	15.8446	15.9469	10.3987	10.5583	11.3202	6.50697	7.39094	8.28208	15.2608	17.1771	17.1587
LINC00115	0.78412	1.19046	0.991999	0.319026	0.625671	0.108463	0.371742	0.214842	0.317878	0.974879	0.647441	0.960752	0.245546	0.549326	0.571178	0.655738	0.620112	0.387038
LINC02593	12.938	10.0731	10.7031	25.8942	20.1466	21.1502	38.1301	37.7047	37.5625	20.1475	14.0943	11.5708	31.3685	25.8683	24.7986	41.9672	41.9816	39.6069
SAMD11	38.8139	38.8274	44.1179	31.6367	37.8531	42.1377	35.6872	52.4214	43.9731	44.8444	46.2174	46.3667	39.5329	39.8012	36.127	44.2921	45.7023	50.573
NOC2L	231.763	217.809	255.779	202.103	207.66	209.604	183.694	189.437	187.866	188.866	245.58	226.529	182.932	193.712	175.447	166.915	172.825	170.684
KLHL17	11.4818	13.7361	14.8278	12.123	7.50805	9.16509	10.1432	7.08978	9.5893	12.4135	13.4469	14.4113	10.9268	7.44088	6.56855	8.5842	6.57319	7.0312
PLEKHN1	14.2822	10.6226	13.4703	19.7796	17.769	20.1198	20.6582	19.9803	24.1057	12.0235	13.7457	13.4923	15.6536	14.3324	14.4698	16.6915	15.5648	16.4491
PERM1	0.616094	0.641018	0.522105	1.96732	1.18877	1.7354	3.18636	1.71873	2.54302	0.844895	1.19528	1.0443	2.33269	1.94761	1.90393	4.59016	3.28659	3.35433
HES4	41.0543	40.5673	42.4471	27.1172	24.4637	27.2783	27.5089	25.3513	25.96	36.6554	34.1152	35.9238	23.2655	18.6272	18.0397	22.4143	19.7196	23.0933
ISG15	3.2485	4.71606	5.11663	8.29467	10.0733	8.56854	6.95689	5.42476	7.99992	3.57456	5.77717	5.13794	9.45352	9.788	7.99649	8.70343	8.37151	7.86978
AGRN	475.737	326.919	489.734	906.033	796.041	914.665	967.061	1012.98	951.248	392.746	479.007	382.421	734.121	839.471	541.858	695.082	901.643	759.692
RNF223	37.0217	33.4703	37.7482	79.2779	87.0308	86.8785	33.7223	37.3825	40.3175	34.5107	30.9776	30.9947	73.9707	65.6195	69.3981	20.9836	21.1458	20.8356
C1orf159	18.2028	15.705	16.4985	14.622	11.8877	13.7205	11.3116	11.3329	12.7151	13.3883	14.2935	16.1657	12.1545	10.0377	9.37684	8.88227	7.99945	8.96639
SDF4	196.87	173.899	197.617	254.955	247.64	248	233.932	229.075	225.693	196.666	189.949	197.288	259.911	257.634	238.086	249.717	237.565	243.189
B3GALT6	40.3822	29.1663	30.2821	37.7514	36.3515	34.7623	38.9798	41.1959	36.7678	33.4058	32.7207	30.0757	34.9903	30.5126	25.7982	35.231	30.0754	33.0273
UBE2J2	59.033	59.7063	57.6926	60.2958	58.0622	54.6651	55.3896	60.8002	56.7411	51.0186	57.6721	58.8147	55.4934	50.7378	51.5012	57.4069	52.8336	56.8301
SCNN1D	1.51223	0.595231	1.25305	0.957077	0.563104	0.542313	1.00901	0.590815	0.423837	1.03987	1.19528	1.00252	0.859411	0.649204	0.618776	0.536513	0.620112	0.580558
ACAP3	24.5878	22.573	26.0008	24.9903	20.2717	21.5841	22.7825	22.9344	22.1984	18.8477	20.0209	21.3454	19.7665	18.1278	17.1829	15.9762	16.743	16.0621
PUSL1	21.1152	23.214	22.1895	17.9718	21.8985	18.6556	18.4809	19.658	18.9137	17.3528	20.6683	21.596	17.9249	16.6795	13.7559	15.6781	14.0765	15.159
INTS11	60.0412	51.0068	56.7006	65.7724	58.813	57.3225	61.3374	59.6723	57.9067	67.7866	56.178	59.3996	66.1133	57.1299	56.1658	64.1431	60.3369	57.6687
CPTP	35.9575	34.0656	35.712	46.8436	44.7354	49.242	51.2473	55.9663	48.3174	26.7117	36.2567	34.044	41.3745	44.8949	38.8401	42.623	46.3844	45.1545
DVL1	84.5729	71.4278	92.778	85.6584	78.334	84.7635	87.147	83.6272	82.2243	74.6107	75.3522	78.3222	77.4084	71.8119	62.4488	75.6483	74.4135	74.8919
AURKAIP1	106.584	118.68	112.67	104.428	105.551	104.612	84.9696	91.3615	88.7938	104.637	110.762	119.927	108.531	103.423	100.242	93.8301	87.1258	101.598
CCNL2	41.2223	53.525	48.1903	58.5412	47.4258	44.1443	43.2814	35.9323	44.7677	53.4883	41.237	51.7553	59.4221	37.1045	47.9314	49.2399	34.6023	37.9943
MRPL20-AS1	14.5622	15.0181	14.149	16.802	17.7065	16.1067	17.7374	19.7117	17.2713	15.6631	15.439	15.0379	14.61	14.8318	17.1829	20.2086	16.9291	18.2553
MRPL20	53.4882	61.9041	51.7928	50.406	55.3718	49.0793	44.2373	45.3853	44.7148	54.7882	51.9945	57.9793	52.2399	48.6404	56.8798	48.1669	49.3609	49.5409
VWA1	73.7633	61.3088	72.3637	63.9646	58.8756	68.5484	88.3153	90.6633	82.4892	65.8368	70.8699	67.1691	67.8321	61.4247	55.6899	93.234	87.1258	93.5343
ATAD3B	15.9624	18.3606	20.6753	12.2293	10.5738	8.13469	8.07211	6.60639	6.72841	12.1535	16.5347	16.0822	12.2159	8.14002	8.18689	9.12072	5.64302	7.22472
ATAD3A	69.7867	62.4077	75.0265	44.8231	46.4248	48.3743	33.085	34.4284	34.7546	44.2595	64.5947	64.6628	39.5329	42.4479	37.6502	34.7541	34.5402	30.8341
SSU72	112.857	112.041	106.875	98.5257	95.5399	97.2367	112.479	106.454	104.9	111.266	112.107	111.071	104.91	98.8288	103.383	118.867	107.9	112.822
FNDC10	69.5627	58.5158	68.3957	55.4573	53.3071	60.5221	64.6831	67.6752	62.9927	53.0984	69.4256	62.9502	51.8102	53.3845	41.4104	55.9165	59.7788	58.4428
MIB2	12.2659	11.6299	13.157	20.2581	17.2059	16.4321	21.0831	18.7987	19.3375	14.8831	11.5045	14.4948	19.1526	14.2325	13.7559	19.1952	17.6732	19.6745
CDK11B	40.7742	37.1791	47.877	37.2728	40.9814	43.2223	37.6522	40.5514	39.9466	37.3703	43.6774	41.9389	41.6201	42.8974	39.1257	35.0522	41.3615	36.3171
SLC35E2B	75.0515	57.6001	68.8656	91.7199	84.3404	87.8005	118.214	106.938	105.747	75.5856	63.2999	58.2717	94.2283	85.6949	82.3924	87.5708	87.5598	91.0185
CDK11A	27.4442	25.9612	35.2943	32.5938	29.8445	31.1288	30.2704	29.863	32.9003	27.5566	28.7364	28.2795	32.8418	31.6112	31.0816	27.4218	30.5095	27.9313
SLC35E2A	17.9227	14.6061	15.0366	20.5772	19.7086	22.7771	29.2614	26.4255	26.2249	20.4075	12.6002	14.286	23.6338	18.9268	17.6113	25.1565	22.5101	22.1902
NADK	49.2315	47.4811	52.5237	71.4617	71.1387	69.3618	61.3906	59.3501	58.7544	45.3644	49.7534	47.3275	64.3945	66.4685	58.3078	49.538	53.2676	49.4119
GNB1	404.046	368.494	411.314	396.496	415.32	418.666	477.104	475.552	480.313	379.683	390.158	375.403	371.081	394.616	388.496	438.092	441.458	448.577
TMEM52	5.8809	7.0512	5.42989	3.08391	3.00322	2.71156	3.45189	2.95408	2.70196	5.97926	6.2752	6.14046	3.6218	3.79535	2.37991	3.45753	2.60447	3.35433
GABRD	4.53669	4.02926	5.06442	2.65855	3.31605	2.98272	3.02704	2.5781	2.8609	7.01913	4.6317	5.30502	4.35844	2.99633	3.37947	3.99404	4.58883	4.32193
PRKCZ	37.8618	30.4484	35.8686	48.4387	51.1799	44.8493	61.8685	67.514	60.2378	39.6451	32.6709	35.0048	44.2597	44.1958	40.982	61.0432	56.4302	51.5406
FAAP20	36.0695	35.7139	35.8164	38.0704	33.0354	35.7384	38.3956	35.5563	34.1189	34.0558	33.1689	35.5061	34.1309	29.4639	26.9406	36.6617	31.3157	38.0588
SKI	57.2408	37.8201	54.1945	60.2958	58.7505	66.813	82.633	88.2463	76.6085	44.5845	55.7796	42.0225	55.8617	61.3248	43.9807	64.918	76.2738	60.9585
MORN1	5.65687	6.3644	5.53431	4.9449	5.3182	5.47736	5.78856	5.04878	6.51649	8.12399	5.47835	5.68097	6.50697	5.69302	5.2358	6.85544	6.51118	6.38613
RER1	82.5566	103.662	83.7456	107.405	116.124	104.287	95.4315	96.3029	88.1051	93.0684	91.9865	95.8246	117.248	109.566	113.664	109.091	100.148	107.726
PEX10	47.0472	37.8201	43.5958	42.4836	40.3558	42.5716	49.7072	49.1451	43.3903	49.3289	41.4861	43.0668	41.2517	43.3968	45.9798	48.465	46.6324	48.3798
PRDM16	4.48069	2.51829	4.07242	2.81806	2.37755	3.25388	6.53204	5.96186	6.09265	3.31459	4.18347	2.71517	2.39407	1.99755	1.85633	4.47094	4.89889	3.22532
ARHGEF16	60.6013	56.547	67.9258	46.1524	42.1076	47.3982	57.9387	57.2553	60.5027	52.1235	61.1085	62.9084	42.8478	44.2457	42.0768	59.9702	54.6939	63.5388
MEGF6	19.547	15.9797	19.7356	15.2601	11.0118	14.9136	20.552	18.1541	17.3243	22.7472	18.7758	18.5885	11.3565	10.3373	9.04365	15.38	12.7123	12.9013
TPRG1L	45.591	44.6881	42.5515	59.1792	56.0601	62.6371	84.5448	82.1233	80.6879	45.6243	48.8071	48.9148	63.9034	68.6658	65.5903	88.6438	89.0481	91.4701
WRAP73	21.5633	27.5638	21.093	14.7283	15.7669	15.5644	13.2765	17.1336	13.9336	19.5626	23.8557	23.977	15.5922	15.0815	14.5174	13.5917	13.1464	13.8044
TP73	15.4584	11.9046	12.7394	3.66879	4.44226	4.55543	3.92985	2.84665	3.86751	12.0235	15.19	11.6961	5.40201	4.79412	4.09344	3.57675	3.59665	3.67686
SMIM1	4.36867	5.35708	4.85557	5.8488	4.88023	5.42313	5.36371	4.67281	4.71518	5.13436	5.42855	4.76199	5.52479	5.14369	4.75982	5.2459	4.15475	5.80558
LRRC47	57.4088	48.1222	55.2909	60.4553	62.7548	60.7933	69.0378	76.5374	65.8536	57.9728	57.5725	53.7604	61.3865	63.0227	56.4514	62.3547	67.7163	65.9255
CEP104	35.6215	31.4557	36.965	40.8353	36.414	40.0227	45.1932	48.2857	48.4763	34.1857	37.1532	34.2529	38.6121	37.504	38.6973	46.0805	42.3537	46.5091
DFFB	5.37682	6.59333	5.32547	3.2966	4.19199	3.90465	3.18636	4.08199	3.33771	3.44457	5.03012	4.80376	3.25349	3.3459	3.33187	3.63636	2.66648	3.35433
C1orf174	24.9798	33.6077	24.5911	15.8449	19.5835	17.0829	16.038	19.6043	15.9998	20.4075	27.2921	30.9529	17.0041	18.4274	19.0393	15.3204	16.9911	18.5778
NPHP4	16.4665	14.6976	17.9604	15.3132	14.453	15.9982	12.9579	12.2997	16.6886	14.9481	16.4351	15.4974	12.2159	14.9317	12.5183	12.8167	15.8129	13.7399
KCNAB2	18.1468	16.987	22.2939	18.2376	15.2664	18.0048	16.4629	15.8446	16.5296	14.1032	20.6185	19.6745	16.7585	18.0279	15.3742	16.8107	16.433	18.0618
CHD5	5.76888	3.93768	7.62273	8.02881	7.75832	6.50776	8.28454	8.80852	7.62906	4.54943	6.07599	4.42781	5.09508	4.29473	4.28384	3.45753	3.90671	3.35433
RPL22	303.062	319.456	278.073	321.046	366.768	304.78	355.279	360.505	335.043	351.346	282.683	279.161	347.816	310.469	328.094	381.937	339.449	350.786
RNF207	1.40021	2.15199	1.61852	3.2966	3.62889	2.33195	2.92083	3.27634	2.3311	3.05462	2.09173	2.13036	4.23567	2.59682	3.18908	5.36513	3.10056	2.51575
ICMT	120.53	116.207	128.855	96.3989	100.045	99.4602	96.0157	105.81	96.5818	88.649	120.773	111.74	85.6956	89.8398	81.7261	84.5902	87.7459	85.0839
GPR153	13.5541	10.8057	15.2977	15.7918	14.9535	16.5948	16.2504	16.2743	14.9402	9.94376	16.3852	12.8657	15.8991	13.833	11.5664	12.3398	15.0687	12.2562
ACOT7	95.9427	91.2078	95.4408	57.6905	56.4355	63.5591	44.1311	46.7281	45.3505	68.3715	84.516	84.0449	44.3211	53.0849	46.6462	32.7273	37.1447	39.865
HES2	1.68026	1.51097	2.92379	2.18001	2.25241	2.92849	7.43484	5.04878	8.31779	1.36483	2.14154	1.87973	1.10496	1.89767	1.71353	2.44411	6.01509	4.38644
ESPN	52.7601	37.3622	53.5157	62.4227	50.4916	54.1771	77.9596	83.0901	83.019	49.6538	51.4965	50.2515	47.1448	51.2372	39.2685	62.8912	70.9408	65.7965
TNFRSF25	2.46438	2.56407	3.44589	2.18001	1.93958	2.44041	2.28356	1.93358	3.07282	3.11961	1.84272	3.17466	2.45546	2.29718	1.99912	2.14605	1.92235	2.12871
PLEKHG5	12.882	10.4394	12.8438	16.0045	11.2621	13.0697	16.4098	14.287	15.7879	14.2332	10.9567	11.9467	15.5308	12.8343	13.0895	14.7243	13.4564	14.1914
NOL9	17.5867	15.0181	19.3179	17.3869	15.1412	17.354	15.2945	14.663	14.5694	16.248	17.979	17.6277	15.3466	16.5797	14.0891	15.2012	12.5883	13.7399
ZBTB48	7.22511	9.5237	8.4581	8.93272	8.94709	8.18893	9.39976	9.29191	9.53633	9.16386	8.66575	9.77461	10.1902	8.53953	8.94846	9.12072	9.73576	8.0633
KLHL21	32.429	23.443	29.029	34.9865	31.3461	30.9661	39.3516	39.7457	33.9599	22.5522	26.4953	24.8125	31.9824	29.3141	23.9419	28.0179	25.3006	23.0288
PHF13	55.6165	45.2834	49.6	42.6963	39.7301	40.9446	46.9457	44.6334	39.3109	40.425	49.9028	47.5781	43.5844	42.9973	38.9353	43.1595	42.4777	37.2847
THAP3	8.23326	13.1409	10.6509	9.19857	8.00858	11.009	9.61219	10.5273	10.8608	11.0486	10.2595	11.905	8.6555	8.38971	9.47204	9.12072	10.4179	10.321
DNAJC11	67.7704	61.6293	66.5684	67.1017	61.6911	67.4637	61.0188	62.3578	60.9265	53.2284	67.2343	62.0312	59.6677	61.7243	64.7811	57.228	57.8565	58.7653
CAMTA1-DT	1.00815	0.77838	0.783157	0.850735	0.125134	0.271156	0.584166	0.375973	0.476816	1.23485	0.597638	0.543034	0.613865	0.349571	0.190393	1.01341	0.558101	0.387038
CAMTA1	48.3354	55.6312	49.0779	34.2953	38.291	35.63	42.06	42.6461	38.94	36.9154	40.739	45.2807	30.3863	32.1606	32.462	27.7198	27.2229	28.1248
VAMP3	66.9302	72.9845	61.3995	80.6603	81.0243	74.4596	99.5207	95.7657	89.9593	60.5075	64.9932	66.2501	79.7411	78.5037	79.4889	94.5455	92.5827	91.8571
PER3	33.8292	30.0821	32.1094	23.5547	22.399	23.4279	30.8546	39.4772	34.1718	31.3261	35.3603	35.1719	25.0457	26.068	26.9406	33.9791	33.424	35.4785
PARK7	169.818	219.64	178.925	181.366	205.345	181.729	145.723	147.274	151.257	189.191	176.801	190.354	199.506	184.624	210.241	158.569	160.237	164.491
ERRFI1	39.262	41.2541	45.1099	92.5706	99.3565	107.92	86.7221	79.8137	95.893	59.9225	38.2488	44.6541	81.5827	64.1214	82.6304	65.8718	53.8877	54.5724
RERE	106.752	61.9041	90.0109	103.63	78.9596	101.575	149.706	134.491	142.568	103.207	98.7099	76.5678	102.331	99.1784	83.8204	148.078	151.431	129.4
ENO1	1697.17	1633.31	1504.97	1437.21	1486.72	1521.35	2489.61	2330.17	2412.27	1544.73	1653.07	1500.57	1339.82	1419.26	1353.03	2600.3	2465.88	2516.14
GPR157	29.4605	23.443	26.2097	44.185	40.0429	41.7581	44.078	45.9224	43.6022	21.1224	25.0012	22.3062	34.4378	35.7562	31.272	37.9136	38.3849	36.8977
LNCTAM34A	1.17618	0.732592	1.20084	1.11659	1.12621	1.24732	1.48697	1.12792	1.58939	1.49481	0.996064	1.12784	2.02575	1.29841	1.57074	0.834575	1.30224	1.29013
H6PD	52.7041	27.7012	41.5073	62.1568	50.7419	56.7802	71.1621	65.473	65.7477	51.2136	38.3485	34.3364	55.8003	50.4381	43.3143	59.851	59.7788	56.2496
SPSB1	20.7232	15.1097	17.4905	24.6713	26.2156	23.9702	52.6812	54.1939	38.6221	20.6024	19.7719	16.667	25.5368	23.3214	17.0401	35.7079	31.1296	22.5772
SLC25A33	18.3148	21.7031	19.7878	12.9205	14.2027	14.3171	12.9048	12.1923	13.033	17.4178	19.5727	21.3036	12.7684	14.6321	13.4227	10.611	11.038	12.4497
TMEM201	36.1255	29.9905	33.0492	26.9045	22.5241	22.1264	21.1893	23.4178	19.8144	21.1224	34.165	29.0732	21.1783	22.1728	18.4205	20.8048	18.3553	18.7069
PIK3CD	3.36051	2.15199	3.18484	3.98782	3.37862	3.14542	3.45189	2.84665	4.34433	2.14473	3.03799	2.71517	3.13071	3.19608	2.09432	2.50373	1.73631	2.12871
CLSTN1	308.271	213.688	259.121	409.895	364.328	378.914	535.202	509.014	478.035	290.124	286.617	221.85	352.604	364.753	305.913	482.921	488.276	440.192
CTNNBIP1	74.6594	76.0065	65.5764	75.1305	74.5174	70.338	79.7652	76.2689	75.7078	77.5353	66.9355	71.5969	72.4975	69.0653	68.9222	76.7809	65.9179	74.7629
LZIC	43.3506	49.2668	45.7364	43.0153	43.8595	40.9446	41.3696	38.8327	42.6486	43.9995	44.5739	45.9908	44.7508	46.5429	47.979	43.7556	42.1676	39.2844
NMNAT1	12.0418	14.5603	13.6269	17.0147	19.3332	17.354	12.2144	11.3866	13.8277	14.8182	12.152	14.2024	19.0912	19.6259	19.2773	14.1878	15.0067	14.3849
UBE4B	108.713	99.8615	112.2	109.585	102.485	116.706	105.893	109.516	107.284	95.7331	111.958	105.223	103.068	109.166	108.095	98.2414	99.9001	97.0821
KIF1B	61.1054	47.8474	73.8256	63.5393	58.6879	72.8869	60.5409	62.1967	61.5093	41.1399	65.043	55.6401	55.1251	56.9302	53.7859	39.9404	42.7877	45.9931
PGD	261.28	274.905	285.852	263.143	284.868	281.298	223.683	238.206	228.501	218.503	293.042	280.038	263.287	308.721	283.685	230.045	256.044	243.77
CENPS	17.0266	27.0143	18.5869	7.92247	8.44655	7.70084	6.26651	5.74702	5.88073	19.3676	18.5766	22.2226	7.79609	9.28861	9.47204	7.1535	7.87542	8.12781
CORT	1.9603	1.09889	1.25305	0.425367	0.375402	0.216925	0.26553	0.107421	0.264898	1.49481	0.996064	1.21138	0.368319	0.299633	0.142795	0.357675	0.310056	0.258026
DFFA	62.2815	71.382	64.1667	57.7436	55.9975	58.5698	53.6371	50.0581	50.8074	47.964	62.254	63.4932	56.4142	51.0874	54.8331	51.6244	46.5704	47.9928
PEX14	28.6204	26.0986	26.1052	32.5938	28.4054	30.8034	35.8466	33.2468	27.4964	31.3911	26.4455	29.4491	36.8319	30.0631	33.0807	36.4233	32.8039	35.414
CASZ1	56.4006	38.6443	61.8172	63.8583	53.6825	71.2599	62.0278	59.4038	60.3967	54.9832	60.1623	46.6591	64.5786	65.5197	52.4532	60.2683	68.0263	62.8937
TARDBP	190.037	237.406	231.658	164.085	186.512	175.492	162.982	171.766	171.972	171.644	222.471	224.148	162.183	171.839	187.489	155.291	158.439	167.717
SRM	102.944	113.964	123.582	102.62	113.246	113.126	70.3655	80.8342	83.072	76.3655	116.29	119.635	90.4837	106.17	101.527	66.1699	72.7392	76.5691
EXOSC10	63.9058	62.7282	64.3233	43.547	41.4194	39.0465	39.086	39.9069	44.238	52.4485	63.2999	62.2818	38.7349	44.2957	44.1235	40.3577	38.943	38.8974
EXOSC10-AS1	0.728111	1.37361	0.678736	0.903906	1.06364	1.13886	0.79659	1.12792	0.953633	1.10486	1.14547	0.91898	0.798025	0.79902	0.904365	0.596125	0.930168	0.967596
MTOR	80.7644	59.1111	91.9949	88.6359	76.2067	96.0979	80.1901	84.7014	90.1713	60.1825	86.1097	74.4374	82.4421	85.8947	75.0623	71.4158	93.4509	77.3432
UBIAD1	30.8047	28.388	25.0088	28.7655	25.6525	23.7533	27.7213	25.0291	22.6223	28.7264	25.051	27.0264	28.7289	24.8196	24.0371	24.4411	23.3782	25.0285
DISP3	4.81674	3.5256	4.17684	4.51953	2.81552	4.17581	10.6743	9.29191	10.1721	5.19935	2.58977	3.21643	3.49903	3.24602	2.6655	9.47839	9.92179	9.0309
FBXO44	1.00815	1.14468	1.04421	2.49903	1.93958	1.51848	1.64629	1.07421	1.11257	0.844895	0.896457	1.08607	2.39407	1.29841	1.28515	1.78838	1.42626	1.61266
FBXO6	1.90429	1.23625	1.77516	1.48879	0.813372	0.921932	0.902802	0.644526	0.794694	1.94976	1.34469	2.08859	1.10496	0.79902	0.999562	1.49031	0.992179	1.0321
MAD2L2	38.3099	45.9244	42.4993	19.9923	20.5846	21.2044	17.1001	16.328	14.8873	37.4353	37.7508	45.1971	19.8892	17.6783	20.0388	15.8569	14.8827	18.0618
AGTRAP	21.1152	22.8019	18.5869	19.9391	19.5835	18.4386	15.4539	16.1131	14.3575	21.3823	19.8217	21.429	23.5724	17.6284	17.1353	16.3338	15.3788	16.6427
MTHFR	21.3393	13.3698	21.824	25.8942	22.2739	26.736	38.2363	36.7917	33.9599	19.8875	18.1284	16.1657	23.2655	23.3214	21.4192	34.7541	32.4319	31.6081
CLCN6	8.23326	8.60796	11.1208	7.4971	6.63211	7.05007	8.01901	7.6806	8.10588	9.03388	8.51635	9.31512	8.10302	8.04014	7.23492	7.6304	8.12347	7.67626
KIAA2013	80.9324	72.6182	85.2597	84.5418	78.3965	84.0585	78.65	78.9544	75.9197	59.8575	86.3089	75.3564	79.25	81.4501	71.1117	80.0596	78.6922	79.0848
PLOD1	80.3723	80.7225	102.907	102.301	103.924	110.957	88.2622	90.3947	91.8666	73.9608	98.5107	101.171	96.9907	117.356	99.9562	88.9419	103.435	104.887
MFN2	101.039	93.2224	106.509	99.9614	95.4773	109.439	91.6079	91.8986	99.7606	82.2148	106.529	105.641	92.2025	104.871	100.861	88.2861	98.6598	94.6954
MIIP	11.8178	12.9119	14.7234	7.07173	7.19521	7.80931	5.52303	7.62689	7.31118	10.5937	12.4508	13.91	7.48915	6.64186	6.33056	6.08048	6.01509	6.51515
VPS13D	68.3305	40.842	71.2673	71.6744	56.9986	80.2081	79.9246	77.8802	93.1911	59.3376	68.7284	55.1388	76.1807	74.6085	61.9728	86.3189	95.8073	83.0197
DHRS3	0.560086	0.320509	0.208842	0.478538	0.250268	0.162694	1.22144	1.50389	0.953633	1.6248	0.249016	0.167087	0.491092	0.299633	0.333187	1.60954	0.682123	0.70957
PRDM2	34.7813	28.388	35.5031	39.2933	35.7884	37.6365	46.0429	44.2037	49.6949	31.7161	37.1034	31.2871	33.2715	34.1581	33.5091	32.6677	39.2531	30.576
KAZN	32.1489	24.084	31.5351	29.1377	24.9017	24.1872	30.058	35.7175	30.3573	23.852	28.4874	23.8935	25.7209	23.0717	23.7991	29.4486	24.2464	25.4155
TMEM51-AS1	2.24034	1.19046	1.67074	2.0205	2.12728	2.00656	1.85871	2.20213	2.22514	1.23485	1.69331	1.21138	1.8416	1.69792	1.18995	1.31148	1.17821	1.93519
TMEM51	14.6182	15.7965	16.8118	13.2396	15.6418	14.8594	15.1883	17.7245	18.278	13.8433	13.5963	16.4999	11.7862	12.4847	13.6131	11.7437	14.5106	12.0627
EFHD2	80.5403	77.7464	81.8138	81.9364	91.2228	75.0561	67.9226	77.3968	63.3636	58.2977	83.1215	82.9171	90.852	80.9008	72.0636	63.7258	65.1118	65.6675
CASP9	11.9298	11.3552	10.912	22.9698	22.6493	19.3063	20.4989	20.8934	20.768	15.2081	13.5963	12.6986	25.4754	24.3202	23.9419	21.5201	22.5721	23.3513
DNAJC16	23.1876	23.9466	23.2859	34.9333	33.4108	35.3046	40.9978	46.7818	41.9598	20.7974	25.1506	24.1023	36.3408	39.6514	34.9371	38.6885	46.3224	38.7683
AGMAT	22.5715	24.3587	22.2417	17.5996	19.1455	20.4994	12.9048	11.7089	15.47	22.8772	22.2122	22.5986	18.0476	21.224	21.1812	14.6051	15.6268	18.4488
DDI2	128.876	85.8965	117.474	138.67	107.803	132.487	163.089	155.277	169.694	122.25	124.359	97.7879	133.577	135.634	120.709	156.841	171.213	150.171
PLEKHM2	88.9416	75.457	90.9507	87.4662	81.212	90.6205	93.679	95.3361	95.4162	75.7806	89.1477	82.5829	78.0836	81.6499	70.9213	79.0462	83.7772	87.9867
FBLIM1	7.1691	2.60986	5.06442	18.1313	15.3289	12.8528	21.1362	21.3768	15.1522	6.88914	4.13366	4.5949	16.3288	12.9841	10.9476	13.5917	13.2704	11.1596
UQCRHL	12.7139	15.3387	13.157	11.6444	13.8273	11.0632	9.50598	11.1181	9.80122	13.1934	11.3053	12.9493	10.8654	11.0365	13.4227	11.7437	10.2319	13.5463
SPEN	163.153	93.2682	153.447	147.283	100.796	137.151	123.631	125.575	128.528	123.29	151.551	110.027	127.07	120.502	93.578	107.004	113.667	90.7605
ZBTB17	18.7629	19.4595	23.9124	27.1172	28.03	25.326	26.553	26.157	26.1189	22.8772	24.0549	21.0112	24.8002	23.8208	22.8947	24.62	23.0062	23.2223
SRARP	3.97661	1.87727	2.03621	3.45611	2.87808	4.28427	13.011	10.9032	10.5429	5.97926	5.22933	3.80124	8.04163	7.24112	8.37728	34.5753	28.8352	30.7696
FAM131C	6.16094	4.16662	5.22105	4.46636	2.87808	3.4708	2.76151	3.43747	3.39069	3.63955	3.78504	5.30502	2.14853	2.49694	2.04672	1.96721	1.42626	1.67717
EPHA2	17.3627	16.987	24.1212	29.1908	32.0969	34.7623	19.7554	24.0086	23.5229	16.5729	24.2043	21.596	21.5467	25.0193	21.1812	14.1878	21.5799	17.6748
ARHGEF19	54.2723	43.8182	50.6964	24.2991	22.7744	27.2241	31.4388	33.3542	30.0924	59.8575	54.3851	49.5414	26.2734	24.7696	22.0856	28.614	28.0911	28.3183
CPLANE2	8.90536	8.74532	9.71115	10.6874	9.57276	10.3582	10.3557	14.7704	12.0793	12.0885	9.91083	10.067	10.4357	11.4859	10.5192	10.0745	12.8983	14.3204
FBXO42	39.374	37.3164	40.6198	40.7821	38.7916	43.5477	38.2363	45.9762	41.0592	33.5358	39.0955	38.806	39.1032	41.9486	39.5065	36.006	41.8576	44.3159
SZRD1	323.281	313.962	304.805	316.527	305.202	305.051	295.694	303.034	292.076	309.297	310.124	305.561	302.083	309.171	310.34	293.651	310.49	306.857
NECAP2	48.7835	58.7905	46.8328	47.3221	51.3676	47.8862	58.4697	65.849	60.8206	45.4293	48.1597	51.9224	45.3032	45.3444	47.8362	54.4858	52.7715	56.8946
NBPF1	50.1277	52.3346	68.6568	47.4816	54.9964	54.7736	39.7764	46.2447	53.8273	44.4545	62.0548	61.6135	45.2419	59.9765	51.3108	36.7809	47.4386	46.1221
CROCC	25.4279	18.5895	27.9326	20.3113	20.6471	21.1502	22.5701	24.5457	25.0593	27.4916	24.4534	23.6429	22.1605	16.7794	15.993	18.9568	18.9754	18.0618
ATP13A2	94.2624	75.8233	104.16	110.542	116.875	124.515	106.956	118.754	112.052	66.6167	100.453	93.6525	98.6481	114.46	97.719	82.3845	98.7839	94.3729
SDHB	104.288	126.097	107.867	87.0408	84.5281	86.8785	73.4987	72.9925	74.6482	108.342	103.541	113.411	83.7312	86.3441	89.2942	78.0328	71.1889	77.9237
PADI2	10.4736	12.6372	12.4783	7.65661	7.63318	7.59238	5.09818	6.06928	6.41053	11.3736	12.1022	11.9885	5.34063	4.894	5.47379	4.82861	6.0771	9.48244
ARHGEF10L	54.6084	37.0875	44.0134	79.8627	70.2002	74.2426	74.7202	66.7621	61.9861	53.0984	45.1217	45.03	73.05	65.1701	63.8291	52.9955	51.0972	46.6381
KLHDC7A	1.62425	1.23625	1.61852	2.28635	2.25241	2.16925	3.5581	3.11521	4.34433	1.55981	2.29095	1.79619	1.41189	3.59559	2.4751	3.75559	6.82123	5.41854
ALDH4A1	126.915	108.332	135.33	135.692	142.778	178.475	286.029	304.861	357.347	117.83	140.296	143.988	121.3	160.253	158.169	277.854	377.958	414.389
IFFO2	28.5084	22.2983	33.2059	31.105	31.9718	38.0161	43.4407	48.232	48.7412	23.982	29.8819	25.1884	24.2477	28.7148	24.0847	31.0581	45.8263	40.1875
UBR4	163.545	80.1731	169.371	160.417	107.365	168.28	185.021	182.83	198.726	132.908	154.489	101.965	160.219	165.297	95.1011	142.057	187.832	133.786
EMC1-AS1	2.24034	1.83148	1.35747	0.903906	0.688238	1.03039	1.11523	0.859367	0.741714	1.6248	0.996064	1.50379	1.3505	1.09865	1.52314	1.01341	1.05419	1.48365
EMC1	145.118	136.903	151.619	149.144	137.272	148.106	126.074	126.596	129.27	130.244	153.294	140.896	139.593	158.156	137.94	116.125	140.331	124.82
MRTO4	116.498	152.517	121.598	91.454	97.4169	81.4554	64.3114	66.9232	63.3106	99.5026	115.942	121.222	85.3273	82.1992	86.3431	63.1893	55.7481	56.4431
AKR7A2	150.047	151.097	140.133	162.703	177.065	156.837	158.681	173.592	152.74	157.215	141.839	150.253	163.902	152.863	146.222	163.1	157.012	165.265
SLC66A1	21.1712	18.6811	20.5709	24.7245	24.9017	23.6448	22.1452	25.0828	21.8806	17.2229	21.2162	21.7631	24.4318	20.8245	19.7056	21.0432	21.2078	21.8677
CAPZB	309.671	316.251	310.652	447.912	491.026	454.567	385.975	398.317	390.46	234.751	320.982	315.879	461.872	455.941	474.03	391.058	397.058	381.62
MICOS10	39.5421	51.9225	39.4711	56.2017	61.1906	54.394	30.536	34.5358	31.7878	39.5801	36.9042	40.8529	57.7033	54.2335	59.7833	33.8599	29.1453	34.9625
NBL1	26.044	26.0528	29.6556	46.046	39.167	36.5519	19.8616	18.9061	16.5296	17.8078	25.549	27.3606	52.3627	39.152	41.0772	18.0626	18.7894	17.8683
TMCO4	14.6742	12.4541	13.8358	17.9718	14.3279	16.9202	16.7815	15.7372	16.7415	20.0825	14.0943	14.5784	18.109	15.1814	17.0877	20.2086	18.9754	19.2874
OTUD3	18.2028	14.5603	21.8762	18.9289	17.2685	20.8248	16.6753	17.2948	18.172	15.4031	19.3236	18.0454	17.1268	17.3787	16.6118	14.9627	16.0609	14.2559
UBXN10	0	0	0	1.70147	0.750805	0.596544	0	0	0	0.0649919	0	0	1.65744	1.29841	1.23755	0	0	0
CAMK2N1	181.3	171.472	152.037	203.007	208.536	187.64	393.197	414.376	344.473	223.702	177.449	170.596	207.671	198.856	192.915	360.537	340.504	319.436
MUL1	36.7416	33.2414	31.7962	41.1011	36.4766	38.7211	46.1491	45.7613	42.9135	34.7057	34.9618	31.7466	39.8398	37.2543	37.6026	43.1595	40.6173	43.4773
PINK1	51.9199	43.635	46.8328	138.617	139.775	133.789	238.924	245.403	206.25	56.9979	49.604	42.649	101.349	118.155	97.6714	163.398	182.685	159.46
PINK1-AS	10.5856	7.09699	8.77136	10.5278	9.51019	10.4124	9.45287	9.99015	10.278	7.53906	8.31713	7.64425	9.51491	10.4372	8.09169	9.29955	12.1542	9.15991
DDOST	465.879	499.033	459.4	468.011	486.083	473.71	492.983	492.525	480.313	512.201	470.59	489.775	480.349	494.494	486.549	528.167	537.823	560.625
SH2D5	1.12017	0.869954	1.82737	1.32927	1.18877	1.19309	1.27454	1.28905	0.794694	1.23485	1.24508	1.50379	0.736638	0.749081	0.809169	0.23845	0.744135	0.90309
HP1BP3	254.559	255.08	240.325	201.996	191.956	178.963	237.278	212.317	220.607	253.468	233.129	233.337	200.673	193.163	200.198	226.766	200.668	200.421
EIF4G3	186.957	153.478	204.039	317.165	272.855	301.363	222.62	219.085	245.56	157.345	197.619	172.476	282.439	279.707	258.553	214.009	220.45	220.225
ECE1	252.095	179.256	224.035	384.213	309.269	321.375	376.15	355.026	328.897	234.491	218.188	197.539	393.979	360.808	315.719	451.624	383.229	388.135
NBPF3	39.374	33.7908	33.0492	29.563	26.8413	28.146	39.7764	37.1139	38.5162	31.911	29.6827	34.7959	29.0972	27.3664	31.7004	42.7422	39.2531	39.9295
RAP1GAP	93.0863	65.5212	78.9945	52.267	49.7408	58.624	133.509	129.335	136.899	91.5086	73.1111	70.0096	47.8201	40.3505	48.2645	144.68	116.643	140.946
USP48	76.8998	75.686	77.4281	66.251	73.0158	70.7176	68.613	68.0512	73.2178	74.4807	76.2487	73.4767	65.2539	61.8741	67.9702	63.4277	61.5151	64.2484
HSPG2	44.4148	18.6353	39.941	46.7904	29.2188	40.8362	34.6782	36.7917	34.3308	32.5609	35.4101	23.7264	37.0161	36.3554	17.6113	21.1624	31.6257	20.7066
LINC00339	7.11309	11.7673	7.67494	4.04099	3.31605	4.28427	4.4078	4.83394	5.4569	10.0088	7.71949	9.69107	4.1129	3.39584	5.47379	5.48435	5.14693	5.28952
CDC42	335.603	418.951	320.625	351.46	392.608	355.974	393.25	414.698	386.221	326.129	330.295	345.996	344.256	349.621	374.312	366.259	383.787	372.137
WNT4	0.952146	0.961528	1.04421	7.23125	7.75832	6.18237	2.49598	3.27634	2.70196	1.36483	0.946261	1.3367	6.26142	5.99265	6.85414	2.92101	3.22458	2.38674
ZBTB40	36.4616	35.7139	43.2303	44.8763	44.4852	48.7539	38.6612	45.815	46.2512	38.2152	42.0837	40.6022	44.6894	45.9936	41.3628	36.5425	42.1676	33.2208
EPHB2	21.6753	18.7727	23.077	19.7264	18.9578	20.391	30.7484	29.3796	25.7481	19.4326	24.2542	21.2619	18.2318	18.777	14.6602	24.7988	22.076	19.3519
KDM1A	212.329	229.256	226.124	166.212	177.503	169.093	151.511	155.921	155.548	193.416	209.92	218.968	162.981	156.808	153.361	127.094	126.131	132.948
LUZP1	40.2142	37.4538	43.4913	55.989	53.8702	58.0275	63.4086	66.3324	64.953	28.0765	41.237	36.7592	45.426	52.7353	47.4078	39.2847	55.004	45.2835
HTR1D	2.96845	2.51829	2.87158	1.96732	2.00215	2.71156	6.79757	8.11028	7.31118	2.27472	2.68937	3.42529	1.3505	1.69792	1.18995	5.54396	7.44135	4.57995
RPL11	424.321	508.694	424.054	487.631	601.395	513.245	496.913	530.122	517.664	508.562	413.815	452.681	569.912	505.28	543.952	575.32	523.375	591.524
ELOA-AS1	2.18433	2.15199	3.13263	1.70147	2.00215	1.84386	1.8056	2.68552	1.80131	2.14473	2.73918	2.63163	2.14853	1.49816	1.99912	1.96721	1.79833	1.80618
ELOA	113.473	122.297	120.502	120.166	125.384	125.112	103.238	106.562	110.992	99.0477	122.715	113.035	117.125	126.145	124.469	98.7779	109.016	106.694
PITHD1	46.6551	51.6478	49.6522	45.9929	46.0494	42.0293	42.1131	52.2603	42.8605	43.1546	50.3012	52.549	46.1013	49.2396	48.0742	51.6244	53.3296	49.6054
LYPLA2	81.6045	76.9222	82.0227	125.218	129.389	127.66	110.885	126.703	115.337	65.9018	89.845	89.3917	114.67	121.101	116.282	103.964	109.698	118.498
GALE	37.5818	51.2357	45.0576	31.1582	32.8477	33.0811	18.7995	20.4637	20.9799	32.9509	38.9959	46.8262	33.824	33.5588	38.8401	20.2086	21.1458	25.609
HMGCL	50.6318	46.7486	40.8808	61.0402	62.7548	54.7736	58.8946	56.1811	56.3703	59.9875	45.1715	50.7946	73.9707	62.823	68.3986	75.3502	67.8403	73.9243
FUCA1	43.6307	39.3768	33.1537	91.8262	89.5335	81.0216	101.645	100.6	84.5554	54.3982	47.1636	43.7351	114.854	103.523	100.004	122.921	121.728	111.983
PNRC2	186.789	250.363	193.127	241.928	261.781	234.442	249.227	234.661	225.746	240.73	226.754	231.917	294.41	269.619	321.526	325.842	268.819	269.572
SRSF10	164.385	224.219	179.186	156.482	176.502	162.477	134.571	143.622	144.899	194.066	187.459	189.811	174.89	156.558	195.39	151.893	150.687	148.945
IFNLR1	1.68026	1.4194	1.5141	0.797564	0.375402	0.542313	1.16833	1.07421	1.21853	1.03987	1.5439	0.91898	0.491092	0.699143	0.52358	0.596125	0.868157	0.967596
GRHL3	10.9217	7.28014	11.3819	19.0884	26.4033	28.3087	66.5418	61.767	78.9396	11.6336	9.76142	8.8974	8.90104	16.9292	12.0423	33.8003	48.9889	42.0582
STPG1	7.05708	7.09699	6.26526	7.07173	8.07115	6.99584	8.76249	6.87494	8.47673	10.1387	5.87678	7.31007	7.91886	8.14002	7.9013	8.46498	7.00727	8.12781
NIPAL3	22.4034	10.9431	14.4101	29.0313	28.2177	27.5495	36.6963	30.1316	31.8937	30.2862	19.1742	18.2543	38.428	32.8098	32.6523	47.1535	40.5553	43.2193
RCAN3	12.77	9.15741	10.3377	13.1864	12.4508	14.1001	22.517	20.1951	20.821	16.248	14.2935	13.0746	13.4436	16.33	14.0891	22.7124	19.7196	21.4806
SRRM1	183.708	150.41	189.733	148.081	138.461	148.54	120.976	123.266	126.621	119.975	186.812	161.114	133.393	144.673	131.799	114.218	125.573	108.435
CLIC4	288.836	283.513	251.446	247.298	263.908	247.837	298.828	292.615	285.772	435.056	241.396	239.561	198.34	207.795	215.477	249.18	239.425	240.48
SYF2	35.3974	38.3237	31.2741	38.4426	45.3611	36.6604	66.117	66.0102	59.9199	51.9935	33.6172	34.5871	39.9626	37.7038	42.9811	70.6408	56.3062	57.6687
RSRP1	13.6101	23.6719	20.8842	15.1005	17.2059	13.4494	12.7454	13.2128	15.576	21.9673	22.3616	21.2619	19.5209	14.7819	14.6126	15.4396	16.557	14.5139
TMEM50A	106.92	119.596	95.1275	114.743	131.391	112.476	147.369	149.852	128.528	111.591	104.138	102.759	121.914	116.557	120.947	146.587	134.626	136.302
RHCE	0.560086	0.366296	0.678736	0.478538	0.750805	0.867701	0.371742	0.375973	0.635755	0.519935	0.498032	0.751893	0.859411	0.898898	1.18995	1.01341	1.30224	1.16112
MACO1	49.7356	49.0379	41.5595	55.5105	65.0697	56.9971	71.8524	79.1692	72.1582	45.2994	50.4008	43.6933	52.1785	58.6281	55.9279	66.766	71.933	66.8286
LDLRAP1	59.5931	51.4646	55.7086	59.8705	60.69	61.0102	77.1099	83.1438	72.4231	50.1738	55.8294	53.0085	56.0459	58.9277	59.2121	67.8987	75.2196	74.5694
MAN1C1	15.2903	10.76	11.2775	21.3215	17.8942	17.9506	34.4658	31.7429	25.1653	13.3883	13.2476	11.2784	20.5031	18.2276	15.4218	35.4098	26.4788	25.5445
SELENON	135.933	111.72	128.699	160.842	138.711	150.438	149.281	144.857	131.442	113.476	131.032	111.28	138.365	136.133	119.376	125.842	126.069	118.821
MTFR1L	58.921	58.5158	48.2425	58.1158	60.0018	54.7736	73.5518	77.1819	68.8205	54.5282	52.5424	58.9401	61.0796	57.2798	61.9252	77.6751	70.9408	79.1493
AUNIP	19.1549	21.4741	18.4825	13.3991	14.5156	12.907	6.31962	7.03607	8.10588	16.313	16.8335	21.3454	12.6456	12.7843	12.6611	5.48435	6.69721	8.0633
PAQR7	8.40129	6.45597	9.24125	14.0903	12.8262	15.4017	21.4548	22.9881	23.5759	9.68379	9.363	9.56575	13.2595	14.8818	12.6611	18.7779	25.1145	20.9001
STMN1	273.266	370.921	282.145	48.0134	48.7397	49.242	39.2453	42.1627	40.3704	288.694	267.692	287.891	40.5151	45.9437	51.4536	24.5007	24.6185	27.4797
PAFAH2	26.212	32.6004	28.5591	37.1665	43.359	41.27	40.095	45.7076	46.1982	28.3365	26.3957	29.1567	42.9706	41.599	48.0742	42.8614	42.0436	48.0573
PDIK1L	29.4605	31.3183	28.037	27.7021	28.0926	26.5733	33.6692	31.6892	32.9533	29.7663	26.8439	27.82	25.3526	27.3664	29.0825	32.7273	34.7263	32.3822
ZNF593	35.5094	44.3218	38.3747	37.8577	41.2317	39.0465	34.6782	37.2751	33.0063	31.0661	36.6053	39.8921	37.9983	34.4577	38.5069	34.7541	34.1682	39.994
CNKSR1	29.2925	26.1444	30.1777	35.0928	30.7204	30.9661	45.087	44.4185	43.9731	35.8755	29.8321	31.12	31.4299	31.4115	31.748	43.696	40.4313	39.9295
CEP85	50.0157	53.8913	56.7006	22.385	20.96	20.1198	13.4358	15.8983	15.3641	42.2447	46.317	52.549	22.6516	21.0742	24.3227	14.1282	15.8129	15.546
SH3BGRL3	139.797	141.757	142.639	201.465	218.109	211.068	151.883	166.019	156.131	126.669	153.444	153.971	198.892	220.629	204.196	153.323	158.563	165.072
UBXN11	8.40129	8.8369	7.25726	6.48685	6.31927	5.31467	4.30159	4.45797	3.17878	11.0486	9.76142	9.89993	8.10302	5.89277	6.23536	5.90164	4.46481	5.41854
CRYBG2	2.12833	2.60986	2.92379	5.42344	4.31713	4.5012	1.7525	1.39647	2.38408	2.53468	2.24114	3.34175	3.6218	3.3459	2.99868	1.25186	1.73631	1.67717
DHDDS	45.3109	42.353	47.9292	58.6475	50.2413	55.9667	43.3345	41.1959	45.3505	41.5298	44.4742	49.3743	52.7924	57.3796	57.7366	43.8748	45.8883	47.9928
HMGN2	751.747	908.094	735.959	458.759	493.091	443.558	454.641	460.943	450.75	817.338	762.039	737.983	495.021	475.617	493.545	514.635	479.037	473.412
ARID1A	217.145	132.416	215.316	207.101	165.678	207.923	199.36	206.946	201.958	173.788	213.307	165.834	201.164	192.314	147.983	173.294	181.383	171.91
PIGV	21.7873	21.1536	20.4143	19.0884	20.5846	19.4148	25.6502	26.9627	24.5295	28.2065	22.3118	20.6353	21.7922	24.47	22.5139	28.6736	30.1375	32.5112
ZDHHC18	67.6024	58.1037	69.8054	55.8295	55.4344	58.0275	48.6451	54.7847	47.7876	55.5681	69.8739	61.2793	52.1172	53.7341	48.2169	41.9076	45.6403	45.7995
SFN	141.478	156.042	163.68	100.28	112.37	123.81	61.4437	64.6674	78.4098	99.7626	150.107	163.746	100.551	107.069	114.807	62.1759	73.9174	80.375
GPN2	42.0624	36.4923	42.7082	56.308	49.0526	49.1878	51.1411	47.8023	48.3174	39.84	44.026	41.5212	55.8003	49.739	50.7397	55.4396	50.4151	52.1212
GPATCH3	11.7058	12.9577	12.9482	14.5157	15.8295	15.9982	18.0029	19.0135	18.8078	11.5686	12.6998	13.0328	14.6714	15.1314	15.4218	19.1356	16.8671	17.9328
NUDC	166.457	196.655	202.994	155.365	187.764	170.069	136.536	146.254	138.118	147.987	205.687	186.302	164.516	177.183	176.351	134.486	138.037	130.948
KDF1	31.4768	31.0436	32.8404	29.4035	30.9081	32.4303	32.6602	35.61	31.3639	31.2611	32.3721	35.8402	29.5269	33.6088	32.1288	33.9195	36.4006	38.5748
TRNP1	17.9788	17.4906	19.4745	21.8001	24.3386	26.4649	28.4648	33.8913	25.8011	12.8034	16.186	19.6745	17.6793	19.4262	18.3729	18.8376	21.1458	23.4803
TENT5B	23.4116	26.6481	30.021	39.3997	44.2349	56.7802	30.7484	38.8864	44.6618	25.9318	28.089	35.4643	35.42	45.3943	42.7432	25.8718	35.1604	42.9613
SLC9A1	169.314	113.689	139.089	355.235	347.497	346.213	517.359	541.348	486.035	139.863	169.331	125.859	277.713	301.38	211.859	413.89	414.049	389.103
WDTC1	98.9111	69.9626	87.9224	126.866	112.996	124.081	156.025	158.392	149.243	92.6135	94.7755	80.745	120.993	117.955	110.666	138.42	148.207	145.526
TMEM222	49.4556	40.0637	39.0534	54.128	44.9857	42.2462	53.2122	51.6158	42.6486	56.9979	45.3209	39.9756	51.3191	48.3907	43.5999	57.2876	47.1285	52.3792
SYTL1	48.2794	35.1644	37.5915	45.5143	37.9156	36.9857	43.6531	39.5846	40.0526	89.4289	38.199	41.8972	48.8637	36.2555	37.2218	55.9762	46.5084	51.2181
MAP3K6	51.1358	44.9171	58.9456	32.8065	29.9696	35.5215	32.0229	30.1316	33.801	38.4102	55.4808	55.5983	33.7626	32.8597	30.558	30.4024	34.1682	36.3171
GPR3	2.57639	2.1062	3.23705	1.01025	0.938506	0.813469	0.53106	0.698236	1.00661	1.10486	2.73918	2.88226	0.736638	0.848959	0.761571	0.536513	0.930168	1.09661
WASF2	225.883	180.767	229.987	204.814	197.524	206.892	235.631	231.868	243.706	209.339	223.317	197.247	195.332	192.314	179.064	193.204	214.869	203.389
AHDC1	38.1978	31.9593	47.9292	62.9012	63.8184	71.8022	42.9097	58.9741	52.3968	25.4118	45.0719	38.263	52.4855	61.2749	42.7908	29.0909	40.2453	37.8653
FGR	0	0	0	0.691222	0.750805	0.488082	0	0	0.0529796	0	0	0	3.06933	3.19608	2.23711	0	0	0
IFI6	9.52146	10.9431	11.0164	12.6547	11.2621	12.1478	18.1092	13.6962	18.3309	16.9629	17.4311	19.4239	29.5269	20.8245	21.3716	33.383	35.4084	39.5424
FAM76A	8.34528	13.1867	10.7031	5.79563	7.69575	6.18237	7.32863	9.93643	8.10588	9.09887	10.9069	12.1974	6.26142	7.74051	8.66287	7.51118	10.4179	9.67596
STX12	45.0869	56.6843	45.2143	86.8813	91.7859	80.425	77.7472	88.1926	80.3171	42.5697	50.0522	47.2857	72.5589	74.3089	76.1571	68.0775	68.3984	68.8928
PPP1R8	65.026	82.554	66.1507	59.0729	59.5638	55.4244	58.0449	55.4292	57.3769	70.5162	66.5869	73.6855	58.5627	59.8766	64.5907	61.9374	56.7403	64.2484
RPA2	78.692	97.389	75.2875	49.5021	57.9997	57.5936	44.1842	45.3853	48.2114	79.5501	77.0953	85.5069	55.432	58.7779	60.0213	53.1148	53.5777	54.7014
SMPDL3B	12.6579	13.1867	12.5827	18.7693	19.2081	17.0829	6.53204	7.14349	6.78139	13.0634	12.3014	12.1138	19.0298	19.2264	17.8017	6.14009	6.69721	7.61175
XKR8	6.88905	6.45597	7.83157	8.02881	8.19628	8.73124	7.75348	9.82901	8.42375	5.13436	7.32107	7.14298	7.24361	7.54075	7.33012	6.85544	7.99945	9.61145
EYA3	36.1255	43.635	44.5877	34.4548	36.7894	41.3242	32.2885	35.5563	36.8208	36.0705	48.6577	41.7718	37.6913	44.046	38.7925	34.7541	38.943	36.4461
PTAFR	4.08863	2.79301	3.60252	5.90197	5.81874	5.26044	2.33666	1.66502	2.75494	3.44457	2.98819	3.34175	3.92874	3.24602	2.6655	1.19225	1.17821	1.09661
PHACTR4	71.2429	57.4627	78.1591	55.5636	48.1141	56.9971	56.08	55.1606	58.7544	67.6566	74.8044	66.8767	55.1865	56.0313	52.7864	54.6647	51.5933	56.5721
RCC1	152.511	190.84	168.483	119.05	143.091	133.192	146.254	159.789	136.528	125.954	144.529	157.146	92.0798	97.6802	100.337	77.854	83.5291	85.9225
SNHG3	50.0717	69.2758	57.9536	31.424	30.7204	28.6341	28.04	25.7273	25.3242	48.354	47.4624	58.0629	26.3962	26.118	30.9864	20.9836	19.7196	18.5778
TRNAU1AP	20.8352	27.9759	19.5789	19.8859	19.5835	17.7879	20.2334	18.3153	20.2912	23.787	21.1166	21.4707	16.3288	15.9305	18.1825	18.5395	14.7587	16.1266
SNHG12	6.94506	9.75264	8.92799	6.54002	4.88023	5.53159	3.87674	2.95408	4.82114	5.13436	5.22933	8.27082	5.27924	2.84651	4.61702	3.15946	3.16257	2.32223
TAF12	34.7253	45.6955	39.1579	27.8084	35.5381	30.6407	24.7474	29.6482	31.205	37.6303	36.6551	42.0225	28.3606	30.8622	34.6991	24.918	31.3157	31.0276
GMEB1	30.4687	24.3129	24.1735	21.6937	18.2696	22.6145	26.7654	26.2107	26.3838	28.0765	24.3538	26.9846	18.0476	21.3738	20.7528	24.7392	20.1536	24.8995
YTHDF2	144.502	142.031	133.607	148.506	149.598	143.496	140.519	145.448	142.78	127.254	136.859	132.375	141.373	139.279	139.415	135.022	131.402	129.851
EPB41	98.6311	82.3251	109.381	84.1696	75.3307	86.7158	94.7942	93.5099	99.3367	86.3742	100.403	93.9031	80.6619	83.0981	77.0614	81.3711	84.9554	81.6651
SRSF4	80.3163	82.5082	87.7658	44.1319	48.552	51.0316	47.9016	54.355	49.0061	61.1574	84.018	82.0399	47.0835	48.4905	52.0724	54.1878	52.3995	50.057
MECR	32.821	28.8916	26.9928	27.2767	28.7808	26.4106	24.6943	23.74	24.2117	35.9405	27.1427	26.7757	28.2378	25.0193	24.1323	27.7794	25.1145	25.093
PTPRU	125.291	77.4259	98.3123	77.7359	69.4494	82.3231	138.925	131.644	139.442	133.623	106.629	82.4158	68.9984	74.5086	62.3536	113.264	122.72	112.951
MATN1-AS1	3.02446	2.51829	2.66273	2.87123	1.68931	2.49464	1.85871	1.34276	2.27812	2.4047	3.0878	2.75694	2.57823	1.89767	2.5703	2.74218	1.79833	2.19322
LAPTM5	0.39206	0.549444	0.313263	2.07367	1.43904	1.46424	3.34568	2.5781	2.43706	0.389951	0.199213	0.0835437	0.245546	0.199755	0.190393	0.119225	0.186034	0.0645064
SDC3	62.1695	49.9994	63.3313	92.3579	90.1591	90.0782	111.151	110.59	95.8401	43.4796	48.5581	45.1136	61.141	63.1725	58.5458	61.1624	67.4062	54.5079
PUM1	93.0863	76.6933	95.0231	114.052	107.803	122.997	124.215	124.286	130.701	93.2634	102.246	83.2095	113.197	114.909	103.383	109.151	125.759	109.79
NKAIN1	51.2478	45.9702	45.893	132.608	124.759	103.202	30.0049	29.6482	21.2978	29.3763	38.4481	29.7833	98.464	90.6389	72.016	15.3204	14.9447	11.4821
SNRNP40	69.6187	91.9404	77.4281	45.5143	50.867	44.09	34.3065	40.9274	37.0857	53.7483	73.4099	79.4083	44.5666	50.7877	54.7855	36.006	39.0671	41.9937
ZCCHC17	50.0157	67.9022	52.3149	69.5476	80.9618	69.1449	51.5659	53.0122	51.0723	45.1044	52.8412	55.6401	72.5589	75.5573	75.6335	52.2206	53.9498	53.2178
SERINC2	17.7547	14.2856	19.4745	10.0493	7.75832	13.5036	9.98393	10.6884	11.2847	17.9378	20.7181	18.6302	12.6456	12.7843	12.5183	13.8897	13.7045	14.1269
TINAGL1	1.84828	0.45787	0.887578	1.43562	1.12621	0.813469	9.61219	4.88765	5.77477	2.20972	1.24508	1.25316	1.53466	0.998775	0.999562	14.3666	10.1698	10.5145
PEF1	92.3021	95.8323	89.3843	80.2349	85.5917	90.5663	93.9976	96.3566	96.7407	76.1705	90.841	95.1145	80.7847	83.198	84.6295	97.2876	93.823	103.92
COL16A1	2.85644	3.06773	3.75915	4.14733	2.50268	2.71156	3.02704	3.0615	3.28473	4.87439	2.88858	2.75694	3.74458	2.59682	3.23668	4.17288	2.66648	3.87038
ADGRB2	55.7285	48.4427	63.3835	87.9447	64.8195	76.4119	66.2232	58.9741	65.8006	57.7778	64.4453	54.1781	90.2996	80.3015	72.5396	101.699	89.4202	99.4044
SPOCD1	3.97661	4.53292	5.79536	14.5688	11.3246	10.2497	4.08916	3.86715	4.55624	5.6543	4.83091	5.09616	16.2674	12.6345	12.1851	8.5842	6.6352	6.83768
PTP4A2	505.813	568.125	518.502	612.582	599.392	581.359	561.649	535.386	533.61	635.361	547.636	552.725	743.329	672.375	761.809	824.978	726.461	802.266
KHDRBS1	337.34	315.015	340.308	268.247	268.162	261.395	269.035	261.57	254.726	322.23	326.161	300.548	257.885	244.55	237.562	238.629	224.047	224.224
TMEM39B	16.2985	14.2856	15.2977	11.6976	12.8262	10.9547	13.4889	12.9979	13.2979	15.5331	16.5845	14.9961	13.505	13.3836	10.8048	11.7437	14.3866	14.0624
KPNA6	122.827	100.274	119.092	149.889	147.721	154.288	156.185	156.942	161.005	105.937	129.09	105.892	149.353	157.157	136.94	137.407	151.369	144.43
TXLNA	102.72	93.085	117.369	111.499	115.123	119.797	96.8123	110.214	111.522	89.0389	108.222	99.5005	108.777	113.86	105.097	92.8763	101.822	101.275
CCDC28B	4.42468	4.99079	4.12463	2.39269	1.75188	2.16925	1.32765	1.18163	1.58939	3.44457	3.73524	4.3025	1.47328	1.5481	2.04672	1.4307	0.806146	1.35463
IQCC	15.7944	17.2159	15.0366	7.70979	7.38291	7.32122	7.75348	6.87494	5.88073	12.1535	13.3971	15.1632	8.04163	6.79167	8.23448	7.39195	8.74358	5.99909
TMEM234	4.92875	6.86805	5.4821	7.65661	7.63318	7.15853	9.08113	6.98236	6.99331	6.49919	6.37481	6.26578	8.28718	6.99143	7.04453	8.76304	7.1933	7.61175
EIF3I	265.985	345.509	280.684	284.943	322.471	288.022	269.672	280.798	256.792	256.133	256.387	291.567	282.317	284.301	303.819	298.301	277.128	289.569
HDAC1	369.041	375.316	328.874	311.635	313.836	297.079	348.057	323.498	328.42	358.04	328.004	336.765	303.434	289.195	310.292	383.01	330.768	353.302
MARCKSL1	392.116	394.73	362.706	625.822	672.158	652.945	666.109	740.345	646.563	301.497	352.507	334.801	555.364	547.129	527.15	525.723	516.305	527.34
FAM229A	2.96845	2.15199	2.29726	4.04099	3.00322	3.19965	4.35469	4.08199	4.18539	3.37958	1.69331	3.00757	3.1921	2.447	2.80829	3.75559	3.16257	3.54785
BSDC1	105.184	86.3543	96.7982	118.571	117.751	122.671	175.462	161.024	162.382	80.655	76.0495	77.0273	87.1075	88.042	88.3422	118.867	111.496	114.37
ZBTB8A	22.9075	21.2452	19.6834	11.9103	9.44763	9.43625	15.4539	13.3739	14.8873	18.6527	18.4272	19.9669	10.5585	10.2374	10.4716	14.6051	12.5263	9.54695
ZBTB8OS	23.5236	34.0656	26.0008	20.2581	26.153	21.5841	15.8787	16.328	17.4303	26.5817	25.2502	30.8276	21.0556	21.4737	27.9877	17.8838	16.2469	18.7714
RBBP4	362.319	397.935	320.259	264.419	263.47	250.006	291.18	276.716	279.096	345.952	317.695	318.97	262.734	240.205	262.266	290.969	257.223	264.541
SYNC	4.53669	6.45597	5.42989	4.51953	5.06793	4.55543	3.82363	3.33005	4.39731	4.22447	6.02619	5.9316	5.15647	6.24235	6.14016	5.36513	5.14693	7.0957
KIAA1522	442.02	329.941	428.491	552.286	553.969	614.657	790.802	837.131	800.627	397.231	441.754	387.851	506.132	535.743	471.555	655.32	706.37	699.185
S100PBP	40.8303	45.6955	41.2985	26.745	30.783	28.7968	29.6863	28.6277	28.3441	37.6303	38.7469	41.9807	24.1863	26.7672	26.7502	28.5544	27.905	25.6735
HPCA	1.23219	0.412083	0.835368	0.691222	0.375402	0.921932	1.16833	1.0205	0.900653	0.974879	0.448229	1.00252	0.552479	0.549326	0.428384	1.37109	0.806146	1.16112
TMEM54	99.7513	95.0997	95.3885	82.7871	79.8356	78.3642	93.8914	86.4201	78.9926	90.0788	102.296	103.636	93.4917	85.4952	77.1566	95.1416	93.761	98.3723
RNF19B	29.7406	29.7158	32.1094	27.7552	28.6557	29.4476	39.6171	41.2496	36.5029	27.8165	33.0195	31.3706	24.0021	27.8159	27.0834	31.8927	31.8738	32.1887
AK2	169.93	192.168	167.335	150.421	153.665	149.516	145.51	139.969	141.826	170.929	161.362	170.011	155.185	148.268	157.36	154.516	144.734	149.139
TRIM62	36.7976	30.7689	34.8766	69.2286	67.8853	68.223	61.7623	75.1946	61.9861	28.2715	39.2449	32.7491	53.5904	55.9314	46.6938	54.3666	57.5464	57.7332
ZNF362	44.8069	33.0124	36.965	34.1357	29.8445	31.7253	49.5479	48.7691	44.3439	47.7691	39.7429	33.7934	32.5962	29.364	27.4165	48.2265	38.943	35.6075
PHC2	67.8264	63.9187	62.8614	74.971	72.1398	69.2534	87.7842	90.9318	84.3435	62.9772	62.4034	58.2717	69.9192	68.6658	54.4999	69.3294	69.8866	68.7638
ZSCAN20	2.91245	2.97616	2.61052	3.56245	3.56632	4.66389	4.35469	4.08199	4.23837	2.98963	3.28701	2.63163	3.80596	3.59559	3.52226	3.57675	3.28659	2.70927
SMIM12	35.8455	44.1845	32.736	34.2953	35.9761	35.0876	36.2183	38.6715	38.3042	24.8919	33.916	36.6339	34.622	33.3591	35.8414	35.9464	33.052	36.2526
DLGAP3	5.32081	3.70875	5.22105	4.25367	2.69038	3.57927	4.4078	4.51168	4.07943	3.05462	4.83091	4.72022	2.88517	2.94639	2.95109	3.45753	3.90671	3.87038
TMEM35B	10.2496	11.8588	8.9802	9.57077	11.6375	10.4666	12.9579	12.1386	13.6687	10.7237	11.0563	11.4873	14.3031	11.6357	13.2799	16.5723	16.805	14.3204
ZMYM6	25.0918	26.9686	22.5549	25.5752	24.2135	23.8075	23.3135	23.74	25.3242	27.6216	24.802	24.3112	23.6952	22.7221	26.417	23.9046	22.076	23.0288
ZMYM1	23.0755	27.5638	24.1735	14.7283	17.0182	18.059	12.8517	14.8241	15.9998	21.7073	23.6565	25.5644	16.6971	17.3787	19.1821	14.1878	15.3788	15.0945
SFPQ	455.406	403.063	453.239	346.355	306.141	316.548	350.075	364.801	343.043	367.139	468.598	388.102	323.2	298.983	261.314	302.832	303.173	263.057
ZMYM4	84.797	99.4494	101.81	92.0921	108.679	115.079	97.4495	109.784	106.33	91.8336	104.935	98.2056	103.375	112.212	108.667	92.2206	109.202	104.629
KIAA0319L	147.303	115.841	130.892	203.007	187.076	203.801	287.622	277.2	280.951	168.459	143.035	124.313	201.839	212.24	198.532	307.481	309.932	310.598
NCDN	98.7991	73.0303	92.2037	172.593	148.847	159.711	157.778	153.182	153.323	94.1733	98.4609	87.0525	157.641	152.463	130.609	157.139	163.276	171.845
PSMB2	175.251	213.551	188.375	143.774	147.971	140.784	111.576	115.961	114.171	141.877	191.593	192.067	137.199	142.575	140.986	115.827	110.938	114.112
C1orf216	18.3148	20.4668	20.4665	20.0454	22.5867	22.5602	16.8877	18.1004	20.2912	17.0279	19.2738	21.6378	22.713	22.6223	26.0838	18.003	19.9056	22.2547
CLSPN	36.6296	35.1644	45.2665	6.80588	5.75617	8.51431	2.54909	2.25584	2.8609	17.7428	38.4481	33.5846	5.4634	7.0913	5.52139	2.50373	2.97654	4.0639
AGO4	19.0989	14.0566	14.7234	20.0454	15.7043	16.4863	25.4909	21.8602	23.6289	16.183	13.8951	16.0404	19.214	15.2813	15.8026	22.0566	16.1229	18.5133
AGO1	57.1848	44.1387	60.8774	70.611	73.704	76.5746	82.155	82.553	83.2839	54.2682	63.001	51.8388	71.7608	76.5062	67.7798	68.4352	83.7151	74.6984
AGO3	23.8597	25.1829	27.0972	20.4708	23.4001	25.8683	22.8887	25.0291	26.4898	26.4517	29.7823	24.6872	24.616	26.1679	22.9423	22.1162	25.6106	23.9964
TRAPPC3	61.2174	78.1585	62.3915	61.5719	70.7008	64.6437	61.7092	60.3706	57.8537	56.9329	60.1124	68.6311	63.842	61.125	66.923	62.5931	58.4766	57.9267
MAP7D1	95.0466	86.9954	107.554	134.948	132.392	133.517	98.2461	118.324	104.158	57.3879	98.2617	93.9866	100.306	101.176	88.2946	62.5335	70.3827	73.3438
THRAP3	271.81	176.692	222.939	263.887	208.348	219.149	245.35	201.146	221.402	230.331	232.033	186.72	248.063	228.72	213.24	245.782	223.674	211.065
SH3D21	9.35343	9.56949	12.8438	16.9615	15.1412	13.0697	13.3296	10.7958	12.5562	11.8285	12.5006	13.0746	18.416	11.7356	15.2314	10.7303	9.79777	10.9016
EVA1B	6.44099	7.46329	7.62273	16.8552	15.4541	18.6556	17.1001	19.2821	16.6356	8.77391	9.86103	9.69107	20.1962	16.5797	17.0401	16.9896	17.5492	18.8359
STK40	59.089	57.829	68.8134	81.3515	93.0998	88.9936	77.9596	94.6378	89.2706	69.4764	72.7127	63.9527	78.5747	92.2868	72.492	64.5007	84.2112	73.9243
LSM10	34.3893	40.6589	34.981	34.2953	31.9092	33.0269	23.048	26.6404	22.1455	31.976	33.6172	37.0516	26.7645	31.6112	32.9855	22.2355	25.7967	27.4152
OSCP1	5.32081	5.12815	4.12463	7.76296	6.81981	7.91777	8.76249	8.27141	8.95355	9.16386	5.17953	5.26325	9.69907	7.24112	8.42488	9.77645	9.54973	9.74047
MRPS15	93.0863	128.845	95.0231	71.1427	76.8949	75.5442	68.9847	64.0229	67.8668	95.4081	95.6719	109.317	78.5134	70.8132	84.7247	75.6483	67.8403	75.279
GRIK3	30.4127	24.4961	33.5191	14.8879	12.2631	15.4559	11.2054	11.9237	12.5032	21.5123	19.8715	18.5885	8.53273	6.4421	9.37684	8.16692	7.62738	5.93459
ZC3H12A	27.6122	24.5876	33.728	37.8577	37.7905	44.0358	44.3966	45.7613	52.7147	23.5271	24.6526	27.0264	34.1923	29.3141	29.5109	34.9926	27.0989	35.4785
MEAF6	114.986	133.881	117.526	124.314	145.281	134.982	218.053	201.898	191.733	97.2929	89.3967	97.1613	89.1332	85.8447	101.765	111.058	94.9392	99.9204
SNIP1	36.7416	31.6846	30.8042	37.1665	36.9146	37.8534	51.3004	49.8433	47.7876	27.1016	28.9855	28.9479	36.218	34.4078	33.6995	36.9002	37.8268	35.156
DNALI1	1.00815	1.0531	1.20084	0.957077	0.750805	0.488082	0.637272	0.913078	0.476816	0.649919	0.697245	0.668349	0.798025	0.848959	0.52358	0.596125	0.558101	0.193519
GNL2	94.4305	114.971	112.461	72.472	78.5842	78.6896	50.3445	60.3706	55.6286	58.8177	99.706	100.503	74.0321	76.2065	76.9662	50.5514	48.6788	53.0888
C1orf109	32.429	33.0582	30.3343	22.7572	22.3364	20.879	20.1272	19.9803	19.7084	23.2671	28.089	25.6897	21.2397	18.3775	21.4668	18.2414	17.6112	15.7396
CDCA8	81.5485	90.6125	91.4728	11.9635	13.5145	16.2152	3.08015	3.16892	4.13241	78.2503	82.4243	84.8804	10.1902	18.3275	17.2781	2.62295	6.94526	6.90218
EPHA10	9.96953	7.92116	8.61473	16.2703	13.8899	14.3171	16.3035	14.663	14.4104	7.14911	8.16772	8.14551	12.7684	12.5346	11.6616	11.1475	11.9682	10.45
MANEAL	119.466	115.338	136.687	150.048	147.158	147.835	91.8734	97.8605	92.6613	87.6091	121.221	122.099	158.684	160.154	160.977	94.2474	103.249	101.275
YRDC	38.87	43.9098	36.9128	33.7104	30.8456	34.003	27.4027	26.3718	24.3706	28.5964	33.5175	37.9288	34.7448	28.8646	31.1292	29.3294	22.9442	28.7053
C1orf122	67.1543	66.7117	78.5246	89.5398	93.35	90.1324	68.4537	73.9056	64.847	63.887	70.3221	78.2386	93.7372	93.0359	82.202	73.4426	78.1341	90.696
MTF1	42.6225	35.9886	43.3869	42.6963	41.7948	45.4458	43.069	44.5797	45.1386	33.6658	44.6237	35.882	43.8914	47.0423	39.6493	43.3979	44.9581	37.5427
INPP5B	20.6112	20.1921	19.6834	14.622	12.5134	12.419	13.3296	13.3739	10.8608	21.3823	18.3276	18.5885	13.3823	14.0328	12.6135	13.8301	12.2162	13.2238
SF3A3	138.061	155.584	133.763	82.8403	94.1634	85.4685	88.0498	94.047	90.9659	143.957	132.576	134.798	84.4065	90.3892	93.7684	87.9285	87.7459	91.083
FHL3	5.76888	5.12815	5.84757	4.36002	3.87916	3.95888	6.10719	6.23041	4.23837	5.45932	5.27914	5.88983	4.17428	4.19486	3.04628	5.90164	4.4028	5.0315
UTP11	56.5127	66.7575	58.2147	39.7187	45.8617	40.1312	35.2624	36.2546	34.7546	54.8532	55.8792	61.8641	42.5409	40.6002	46.551	36.9002	37.8268	34.8335
RRAGC	30.6367	37.8659	35.2421	30.8923	33.6611	33.8946	41.6882	45.7076	39.3638	30.9361	38.4979	35.9238	28.7289	31.0619	30.7008	33.5618	37.2067	35.543
MYCBP	57.6328	82.554	61.2429	72.6315	83.6522	79.1235	58.098	61.5522	58.4895	58.9477	64.3457	68.9653	82.749	82.9982	92.4356	69.0313	67.3442	76.1175
AKIRIN1	75.8356	98.1674	87.5048	105.544	117.188	111.337	88.156	103.715	99.3897	62.5222	93.2316	89.9765	95.0263	102.325	104.192	83.0402	91.3425	87.0191
NDUFS5	121.259	150.777	119.301	113.626	126.636	117.411	111.204	119.398	111.045	126.409	117.934	124.772	115.161	113.211	124.802	110.999	107.775	112.886
MACF1	83.9008	51.0983	84.6332	96.133	59.7515	92.844	77.4817	72.8314	79.8932	58.3627	76.7467	55.3059	80.9074	79.4526	54.3571	67.8987	62.5693	56.1206
BMP8A	4.31266	3.61718	2.87158	6.06149	6.13157	4.88082	8.60317	7.35833	6.30457	2.66467	3.78504	3.67592	4.48122	4.6443	4.14104	5.18629	6.75922	4.90249
PABPC4	179.171	165.429	198.765	171.848	191.205	182.271	189.164	191.531	185.852	176.258	179.142	165.375	163.841	171.939	152.362	165.186	184.731	164.233
HEYL	3.41652	2.01463	2.19284	2.5522	1.50161	2.11502	3.39878	2.52439	2.64898	2.98963	2.19134	2.08859	3.31487	2.29718	2.33231	3.69598	2.7905	2.25772
PPIE	28.0603	33.7908	26.2619	23.9269	27.7172	23.8618	24.057	24.5457	23.417	27.6866	27.0929	31.2036	25.7823	24.7197	28.1305	28.4352	25.2386	27.6732
BMP8B	12.3779	8.42481	10.6509	17.8123	14.2653	17.0829	20.4458	21.2156	17.6952	10.8536	10.4089	9.02272	15.7149	16.0803	14.3746	16.6319	15.1927	15.4815
TRIT1	20.3871	22.8477	17.5949	16.4298	17.8316	19.7402	15.4007	15.6297	14.6753	24.307	16.2856	19.0062	18.2318	16.0303	19.0393	16.4531	13.4564	15.2235
MYCL	2.12833	1.92306	1.46189	4.09416	3.44119	3.41657	4.62022	3.92086	4.02645	2.33971	2.14154	1.58733	3.43764	2.04749	2.42751	2.98063	3.47263	2.70927
MFSD2A	3.41652	3.98347	3.55031	3.61562	4.44226	4.44697	2.01803	2.36326	2.596	4.61443	3.88465	3.96832	5.09508	4.69424	3.85545	4.23249	3.53464	2.58026
CAP1	322.609	350.774	322.87	358.372	379.219	367.851	376.362	384.782	375.36	291.749	325.763	319.722	329.83	337.436	344.611	347.779	343.294	342.013
PPT1	295.221	380.261	311.958	292.334	364.015	359.879	419.909	456.485	447.572	296.233	303.451	335.553	275.319	321.955	377.406	393.264	425.335	480.895
RLF	40.4942	48.7174	39.68	35.5714	36.6643	34.8165	34.4127	34.2136	35.7082	36.6554	39.9422	40.4351	33.4557	31.7611	32.5571	33.0253	32.1838	33.4143
ZMPSTE24	106.08	142.947	110.895	121.602	142.09	128.582	121.613	121.117	133.562	90.0788	110.762	115.624	121.729	134.185	152.267	125.306	137.975	136.883
COL9A2	10.5296	10.8057	10.8598	14.303	14.453	13.9374	16.6753	17.3485	17.4303	13.1934	9.66182	11.7797	9.76046	10.9366	9.80522	16.0358	15.2548	15.9331
SMAP2	83.5088	74.175	85.573	94.3784	98.6682	104.612	76.6851	79.76	83.4958	76.3655	87.803	88.974	96.0699	104.672	110.333	82.3249	97.7297	110.757
ZFP69B	6.04893	5.90653	5.89978	3.93465	3.69146	3.36234	4.24848	4.51168	5.40392	5.26434	4.58189	5.51388	4.05151	3.49571	3.90305	3.93443	3.8447	3.9994
ZFP69	9.74549	9.24898	11.1208	6.80588	4.5674	5.58582	5.62924	4.72652	4.29135	8.059	10.4089	11.6961	5.4634	5.69302	5.04541	4.59016	4.52682	4.64446
EXO5	13.8341	13.4156	12.5305	8.18832	8.00858	8.02623	6.85068	6.23041	6.41053	11.6985	11.3551	12.2809	7.85747	7.64063	9.99562	6.1997	6.32514	7.41824
ZNF684	3.19249	5.76917	4.69894	3.03074	3.25349	2.6031	1.48697	1.0205	1.16555	3.2496	3.03799	3.84301	2.76239	2.24724	2.90349	1.19225	1.36425	1.29013
RIMS3	24.0837	18.498	22.6071	33.7104	22.1487	28.3087	21.4548	18.745	21.5627	20.1475	24.553	23.434	28.913	30.4127	28.9397	19.9702	19.7816	28.1248
NFYC-AS1	1.06416	1.32782	1.40968	1.16976	0.813372	0.813469	0.637272	0.644526	0.741714	1.29984	1.89252	1.75442	1.22773	0.898898	1.18995	0.536513	0.868157	1.22562
NFYC	65.082	58.3327	58.1103	49.8212	46.7376	50.3266	56.1331	58.5981	55.6286	72.7909	59.3654	58.1464	53.8974	48.1909	54.6427	63.07	57.1743	65.861
KCNQ4	2.46438	1.09889	2.14063	1.16976	0.813372	1.78963	0.743484	0.751946	0.423837	0.844895	1.34469	1.71265	1.28912	1.29841	0.904365	0.23845	0.49609	0.387038
CITED4	4.14463	3.93768	5.01221	5.31709	5.06793	6.83314	8.23143	7.30462	7.47012	5.26434	5.12973	5.97337	7.79609	6.29228	5.66418	8.04769	7.31732	8.96639
CTPS1	78.188	96.7022	90.3241	45.727	48.99	46.5305	27.1903	29.9704	32.5295	44.5845	75.651	81.6222	34.4992	37.7038	38.6497	21.3413	21.4559	21.6096
SCMH1	9.18541	8.79111	8.14483	11.6444	12.2006	9.54471	7.9128	9.34562	7.5231	14.1682	11.7037	9.64929	13.505	14.1327	12.3755	8.28614	8.92962	6.19261
HIVEP3	18.2028	15.3387	17.5427	21.9064	18.3321	21.5298	24.7474	29.4333	27.0196	20.1475	16.2358	14.9543	22.2833	19.7258	17.9921	23.9046	22.7581	23.8674
FOXJ3	84.4049	78.5705	85.3119	100.865	96.4784	97.996	95.2191	98.3976	100.025	84.8794	90.9904	83.2513	95.3946	100.127	99.7658	100.089	96.2414	97.5982
RIMKLA	6.49699	8.28745	7.10063	13.984	15.4541	14.2628	13.1172	15.8446	12.2383	4.87439	7.57008	6.64172	11.8476	14.7819	12.8039	12.8167	13.2704	10.3855
PPCS	65.53	78.479	64.2711	87.7852	95.3522	83.2993	87.4656	89.4279	85.3501	73.7008	70.1727	74.1868	96.9907	88.2418	102.05	111.475	96.3654	106.629
CCDC30	1.17618	1.4194	0.991999	1.54196	1.37648	1.68117	2.07113	2.14842	2.70196	1.94976	1.44429	1.50379	1.47328	1.64798	1.76113	2.80179	2.17039	2.32223
PPIH	47.3272	59.8894	43.4913	22.7572	29.4065	23.916	21.1893	20.9471	18.066	42.7647	42.9802	48.5389	23.818	22.5224	27.4641	24.3219	20.5257	21.2226
YBX1	857.323	996.188	973.517	721.636	879.317	791.072	425.167	490.215	477.77	805.25	893.569	934.352	734.121	786.136	779.706	405.663	450.387	473.928
P3H1	14.1702	16.2086	19.3179	32.4343	30.2199	32.9184	25.0129	25.6736	24.1057	15.3381	18.6264	18.7556	32.3507	33.3591	31.0816	25.2757	29.0213	27.7378
C1orf50	14.4502	14.3771	14.4623	18.9289	21.0851	20.0113	17.3126	17.3485	18.8607	14.6232	13.7457	14.4531	17.5565	18.6771	20.4672	18.1818	17.9833	20.255
SVBP	19.491	24.9997	18.5347	16.164	15.4541	13.1782	22.7825	19.2283	17.1654	24.5669	17.1323	22.6821	17.6179	12.0352	15.1362	18.0626	16.805	16.2556
ERMAP	18.7069	16.6207	15.6631	19.6732	22.5241	18.4929	33.4037	35.1266	35.0725	22.4222	16.9829	17.4606	22.7744	22.3726	22.2759	34.7541	33.7341	33.1563
ZNF691	9.1294	10.8057	7.9882	8.56052	9.19736	6.61622	7.64727	8.86223	9.00653	11.1786	8.76536	8.68854	9.0852	7.9902	7.61571	9.18033	9.30168	8.90188
SLC2A1	97.1749	92.3982	95.5974	386.872	324.285	338.729	107.009	103.876	104.37	91.8986	98.4111	100.044	350.763	316.212	316.337	96.6319	108.21	104.887
EBNA1BP2	105.352	134.522	111.261	100.865	115.624	95.664	93.5197	102.641	91.6547	100.477	106.828	107.771	92.9392	96.7813	95.8627	86.5574	81.2347	79.1493
CFAP57	0.224034	0.366296	0.261052	1.22293	1.43904	1.51848	1.69939	1.18163	1.05959	0.584927	0.597638	0.710121	1.22773	0.948836	1.33275	2.02683	2.04637	1.67717
TMEM125	17.4187	14.5145	14.9322	20.9493	21.961	21.3129	25.066	23.7937	21.4567	18.0678	16.4849	18.0872	21.915	21.0742	20.3244	24.5604	25.1145	28.8989
C1orf210	24.4757	21.062	21.0408	23.023	21.7733	22.8314	20.0741	18.3153	17.8541	27.2966	19.473	22.9745	22.0378	21.4237	24.751	23.845	20.5877	23.8674
CDC20	176.987	236.902	217.143	23.6611	25.152	27.8749	3.98295	5.10249	6.41053	129.269	208.426	214.958	18.4773	30.3128	26.4646	4.53055	8.24749	12.7078
ELOVL1	95.9427	113.598	101.706	130.588	140.275	134.656	113.7	130.57	121.217	84.8144	110.663	113.285	132.595	139.329	136.845	109.508	121.79	128.045
MED8	39.9341	48.0764	42.8126	43.7065	48.4269	42.6258	37.2273	38.2418	40.2645	52.6434	40.7888	50.2515	40.5151	47.4418	51.5964	39.2847	45.5162	45.219
SZT2	29.9646	21.5199	34.0934	34.4016	26.153	35.0334	30.2704	32.7634	32.7414	34.6407	32.2227	26.8175	34.9289	32.0107	27.8925	30.5812	34.6023	26.5766
HYI	8.56931	6.27282	8.61473	8.7732	7.82088	7.05007	9.7184	10.0976	9.37739	9.09887	7.07205	6.30755	9.33075	8.93904	8.18689	10.7303	10.914	9.41793
PTPRF	878.27	612.173	794.591	1111.96	937.192	1085.39	1318.46	1313.76	1344.25	868.812	852.431	716.805	1061.68	1003.67	884.088	1174.01	1251.94	1215.11
KDM4A	104.232	82.8745	97.6336	146.114	140.4	140.188	198.882	192.176	189.031	139.993	104.188	92.6917	142.724	151.464	128.467	186.528	185.91	167.265
KDM4A-AS1	1.68026	1.92306	1.984	0.265855	0.625671	0.705007	0.424848	0.322263	0.211918	1.16985	1.19528	1.67087	0.736638	0.499388	0.809169	0.596125	0.248045	0.645064
ST3GAL3	9.29742	7.64643	7.15284	5.90197	5.1305	5.26044	6.69136	5.69331	5.77477	8.25397	7.66969	7.89488	6.8139	5.59314	6.94933	6.25931	5.64302	6.0636
IPO13	29.5725	28.6627	38.1136	50.6187	52.0558	55.8582	42.9628	47.9097	48.5293	24.437	34.7626	36.8428	46.1627	49.739	50.3589	38.927	45.3922	50.2505
DPH2	49.6236	47.1606	50.6964	52.267	51.2424	52.4959	46.7864	49.6822	47.2048	41.1399	51.0483	46.6174	43.2161	45.644	44.2663	44.6498	48.1827	47.7992
ATP6V0B	112.073	144.779	111.052	162.544	166.554	152.986	132.34	128.099	121.323	114.906	126.102	131.665	178.635	169.842	155.551	140.626	138.409	148.3
B4GALT2	70.1227	62.133	74.7654	54.8192	47.0504	55.5328	53.1591	52.69	52.8736	48.094	63.7979	65.0805	43.7686	43.3968	41.0772	40	39.6252	41.4131
CCDC24	13.5541	14.6061	12.8438	19.6201	16.1423	17.9506	12.8517	12.2997	11.5495	12.5434	12.2516	13.4088	18.2318	14.6321	18.2777	13.6513	13.9525	13.5463
SLC6A9	24.1957	14.6976	17.5427	86.5623	58.8756	51.1401	22.6232	21.5379	19.3905	64.082	14.5425	15.8315	82.0738	58.9277	53.7383	12.2802	12.5883	12.5787
DMAP1	26.9961	30.0821	31.2219	42.4836	34.7873	37.0942	29.2083	29.7019	31.5229	28.9864	28.6866	30.577	44.9963	37.0046	42.7908	31.5946	28.2771	29.0924
ERI3	87.2054	94.2297	79.2033	72.9505	83.1516	71.9649	73.2863	77.5042	72.0522	90.9887	74.8044	82.75	76.3034	75.6073	72.1588	71.8331	77.452	74.6339
RNF220	80.7644	66.1165	70.5886	60.2427	53.9954	55.6413	65.4797	61.9282	56.5822	83.8396	67.8817	71.764	61.2024	55.0825	52.358	66.4083	60.2749	58.7653
TMEM53	9.91352	8.92847	7.57052	10.1025	10.5113	11.3343	10.0901	10.6347	8.74163	7.34409	8.36694	7.81133	10.1902	10.637	10.3288	12.2802	9.11565	11.0951
KIF2C	129.828	140.2	145.302	11.7508	13.0765	15.1305	1.54007	0.859367	2.64898	125.824	128.243	130.662	11.6634	17.3288	14.6602	2.3845	4.46481	6.12811
RPS8	812.404	910.155	749.168	780.496	886.387	768.078	787.509	788.792	779.595	930.164	764.13	776.288	889.184	763.214	792.129	878.927	799.263	865.934
PLK3	12.826	13.965	14.9322	19.7264	18.8327	20.6621	15.0821	16.7577	18.8078	12.4135	14.8413	14.2442	13.0753	15.1314	13.1847	9.95529	13.7045	11.8692
EIF2B3	29.5165	42.0325	31.7962	22.2786	23.7129	23.5364	15.0821	16.2206	16.2118	21.7723	30.5294	38.0124	24.0021	23.4213	25.1318	15.2012	15.0687	19.6745
HECTD3	32.2609	32.6004	39.3667	51.8948	57.0612	63.6675	58.6821	72.348	66.1185	24.047	36.0575	34.6706	44.1369	51.1872	50.2161	44.1133	53.5777	50.1215
UROD	36.9097	44.5966	34.9288	35.6777	38.7916	36.4977	28.3055	27.446	29.4566	40.49	35.7089	37.5111	38.0596	32.4602	38.5069	30.4024	30.1375	33.9304
ZSWIM5	30.7487	20.65	26.5751	33.9231	27.7172	31.4542	30.3766	31.8503	29.6686	25.8018	25.2004	20.51	30.5091	31.2117	26.7026	30.1043	28.8352	27.8023
LINC01144	2.68841	1.4194	2.14063	2.5522	1.06364	2.06079	2.07113	1.34276	2.11918	4.61443	1.34469	1.96328	1.10496	1.34835	1.42795	2.98063	2.2324	2.38674
MUTYH	19.435	21.062	21.1975	10.7405	10.9492	12.3647	8.76249	9.18449	10.7019	20.6024	18.6762	21.596	12.2773	12.1351	13.3751	9.0611	9.79777	10.9661
TOE1	22.5715	21.062	20.0488	23.9269	16.2674	18.8183	13.8607	11.9237	12.1323	19.4976	21.1166	21.2201	18.4773	14.9317	19.0869	13.2936	12.0922	12.3852
TESK2	23.5796	19.0932	16.864	22.1191	19.0204	17.354	19.543	15.7372	17.2184	26.6467	18.7758	21.2201	20.5031	18.9268	21.2288	24.3219	22.5721	22.3837
CCDC163	4.53669	5.49444	4.17684	2.5522	1.87701	3.03695	2.01803	1.82616	1.85429	5.32934	4.18347	4.80376	3.31487	2.19731	2.90349	2.20566	1.86034	2.25772
MMACHC	18.3708	16.6665	17.0206	12.0166	11.7	12.5274	6.95689	8.7548	9.00653	14.7532	15.3892	16.0404	11.2951	10.3373	10.9476	7.03428	7.93744	8.90188
PRDX1	649.307	738.728	687.769	596.844	689.864	661.622	520.386	552.358	593.159	671.041	707.803	697.088	636.271	708.481	703.12	557.139	648.141	664.803
AKR1A1	77.7959	91.5283	78.4724	73.8013	84.7158	82.4858	72.5959	73.1536	75.4429	94.8882	85.3627	94.4461	88.458	86.3941	90.4365	82.8018	89.7922	95.792
NASP	170.882	192.992	184.251	62.529	67.1345	60.1967	35.2624	37.8122	38.1983	139.213	175.556	166.586	66.8499	62.773	68.0654	43.7556	37.9509	40.8325
GPBP1L1	123.611	131.363	119.04	109.904	118.752	115.567	143.333	138.573	141.085	142.527	121.022	122.726	120.072	118.505	131.657	133.77	133.138	124.175
TMEM69	28.9564	30.6315	28.1937	33.8167	29.5942	28.4714	36.059	30.6687	29.4566	31.3911	27.6408	28.4884	33.3943	31.8609	34.4135	36.6021	29.3313	34.7689
IPP	26.6041	24.9081	26.5229	24.4055	21.2102	22.0721	16.038	16.4891	18.8607	22.6172	24.7522	26.2745	23.4496	21.224	25.6554	17.8838	17.5492	18.5778
MAST2	76.3957	80.7683	103.742	78.1081	79.9607	91.0001	63.621	64.3988	69.0854	60.0525	92.2355	84.9221	61.8162	68.2663	67.8274	53.9493	57.3604	59.4104
PIK3R3	125.515	113.186	109.851	222.042	258.027	240.516	295.588	329.03	297.321	144.607	148.314	118.047	220.991	269.519	230.851	275.589	339.635	295.439
TSPAN1	38.7579	35.2102	30.752	58.8602	62.2542	57.8648	107.54	96.5177	90.3832	51.9285	40.0418	37.3858	63.4737	59.2773	68.0178	134.724	126.999	130.367
POMGNT1	126.579	123.488	122.799	131.758	122.131	129.016	135.155	124.125	131.177	123.81	129.289	131.999	132.595	123.748	129.848	147.839	146.533	148.945
RAD54L	32.0929	39.1937	40.5153	4.99807	5.6936	5.80275	0.477954	0.537105	1.11257	30.1562	41.0378	39.4744	5.09508	6.99143	5.90217	1.54993	1.98436	2.12871
LRRC41	86.9253	78.2958	89.4366	144.997	135.395	138.398	132.234	135.673	135.522	92.4185	94.8751	93.2347	141.557	142.375	128.658	141.639	138.471	142.495
UQCRH	146.686	198.853	147.651	147.762	179.505	151.088	129.366	127.401	130.701	157.865	141.939	165.416	156.045	145.771	174.638	140.626	139.339	154.622
NSUN4	37.4697	41.6662	41.3507	36.6879	37.5402	39.1008	33.1382	36.2546	37.0327	40.1	40.0418	41.7718	40.6379	39.3517	40.4108	36.4233	38.695	40.8971
FAAH	32.429	31.7304	31.5351	46.2055	40.6686	35.6842	48.2203	47.856	42.9135	38.4752	29.8321	32.4985	45.733	39.8511	37.8405	53.6513	50.3531	51.0246
DMBX1	3.2485	2.1062	4.07242	0.425367	0.312835	0.162694	0.159318	0.161131	0.0529796	3.89951	2.53996	2.84048	0.675252	0.39951	0.237991	0.178838	0.186034	0.258026
MKNK1	27.6122	27.8843	24.8522	31.4772	29.4065	27.3868	23.4729	24.0086	22.4633	22.0323	25.4992	25.815	30.6933	28.2653	29.4157	21.9374	18.9754	21.4806
MOB3C	7.61717	7.28014	6.78736	8.34784	8.38399	8.40585	9.55908	8.59367	9.48335	6.88914	6.67363	6.59995	8.47134	8.28983	7.13973	10.5514	8.99163	9.61145
ATPAF1	95.4946	103.021	89.6454	73.6949	73.3286	73.3749	82.8985	77.1282	76.0787	94.6932	91.1398	98.8322	73.1113	74.8083	79.2986	79.225	77.204	85.4065
EFCAB14	164.497	129.715	146.659	189.395	176.064	199.842	274.771	259.475	275.017	161.765	155.934	136.385	182.87	199.455	185.776	292.28	284.942	280.28
CYP4B1	6.49699	3.66296	4.90779	6.91222	5.56847	7.37546	28.8366	19.3358	27.1785	9.42383	4.38268	6.43286	7.61193	7.0913	7.23492	16.9896	18.6034	18.0618
LINC00853	0.896137	1.09889	0.469894	1.22293	0.625671	0.705007	0.690378	0.913078	0.900653	1.10486	0.747048	1.08607	0.982184	0.998775	1.42795	0.71535	0.49609	1.29013
STIL	72.5871	87.5906	85.3641	18.5035	16.0797	19.9571	7.43484	5.80073	8.74163	63.1071	69.2264	71.6805	17.4338	17.6284	20.8956	7.09389	9.61174	10.6436
CMPK1	169.986	204.164	186.861	157.811	176.251	167.304	172.01	167.791	178.541	166.444	172.419	179.494	156.351	165.547	184.253	178.063	169.973	178.231
LINC01389	3.30451	2.15199	1.93179	1.75464	1.18877	1.08463	3.02704	2.30955	2.596	4.15948	2.39055	2.58985	1.78021	1.59804	1.76113	3.45753	3.03855	3.28983
FOXD2-AS1	3.2485	2.79301	4.43789	1.01025	0.938506	0.976163	1.16833	1.39647	1.90727	3.89951	3.68544	3.59238	0.798025	1.49816	1.33275	1.01341	2.29442	1.61266
FOXD2	8.12124	5.76917	8.19705	3.40294	3.31605	3.6335	8.60317	8.16399	8.15886	8.77391	6.2254	7.10121	4.29706	4.894	3.90305	7.98808	8.18548	10.063
SPATA6	0.560086	0.686805	0.626526	1.11659	1.25134	0.650776	0.902802	1.12792	0.900653	1.03987	0.946261	0.668349	1.41189	1.24847	0.999562	1.72876	1.55028	1.67717
FAF1	77.0118	81.5009	74.2955	48.2792	46.4873	46.7474	48.5389	45.6002	46.728	79.8751	79.8345	77.4032	52.3013	51.8364	55.4043	55.4993	51.5313	55.6045
CDKN2C	19.827	20.0089	21.1452	5.52978	5.44333	5.47736	2.07113	2.25584	1.69535	24.502	21.1664	22.6821	7.48915	7.69057	7.09213	3.93443	4.65084	5.22502
RNF11	154.192	188.734	169.371	256.603	290.624	273.055	227.4	238.85	239.203	141.877	166.492	178.157	274.091	280.007	293.681	223.368	236.759	244.028
TTC39A	68.6105	74.3581	79.7254	183.652	192.018	185.091	113.753	116.122	126.939	75.5856	80.3823	79.9513	214.178	214.437	219.237	120.477	131.278	145.913
TTC39A-AS1	2.07232	2.8388	2.61052	4.46636	4.5674	6.07391	1.7525	2.30955	3.17878	2.27472	2.78898	2.84048	7.05945	8.14002	7.66331	3.04024	5.76704	3.93489
EPS15	110.225	123.945	113.349	162.863	184.761	176.143	127.879	132.396	136.687	120.43	112.306	111.155	195.639	208.045	205.005	114.575	126.875	121.659
OSBPL9	117.898	147.663	121.598	159.566	190.83	175.764	183.375	186.268	204.395	129.334	128.144	133.419	171.453	180.029	183.491	164.888	185.228	177.457
NRDC	211.6	236.215	238.811	173.55	179.192	180.59	141.528	136.317	149.614	210.574	231.834	233.922	177.837	184.773	196.485	149.627	147.029	158.299
RAB3B	0.616094	0.45787	0.626526	0.372197	0.375402	0.488082	1.32765	1.07421	1.00661	0.844895	0.697245	0.960752	0.368319	1.04871	0.666374	2.08644	1.17821	1.61266
TXNDC12	112.017	130.859	106.979	80.6071	84.0901	77.7134	66.1701	65.5268	62.6219	125.629	105.234	113.202	86.3708	85.4952	91.9121	77.9732	68.0263	75.0854
KTI12	11.7618	12.5914	11.3819	11.4318	9.8856	9.38201	9.66529	10.0439	9.21845	11.5686	10.4089	10.7354	9.26936	9.03892	9.85282	7.86885	9.79777	9.22441
BTF3L4	126.019	160.484	107.031	97.037	112.558	95.7182	103.557	105.648	96.7937	146.102	113.452	124.397	99.2006	94.1346	109.761	101.818	88.614	95.792
ZFYVE9	32.2609	25.0913	29.7078	35.2523	34.5996	36.3892	42.5379	42.3238	44.8737	35.1606	30.2305	28.9061	36.9547	37.7537	39.9825	49.4188	51.0972	48.1218
CC2D1B	25.7639	31.7304	35.7642	34.2953	36.2889	37.9077	30.2173	32.9782	35.1255	21.3173	34.0156	33.0415	33.2715	34.6076	34.1755	28.1371	30.0754	28.9634
ORC1	40.2702	49.5874	48.1903	5.05124	6.31927	6.67045	0.637272	0.751946	1.11257	27.4266	44.9723	43.4427	5.27924	7.39094	6.71134	0.9538	2.17039	1.80618
PRPF38A	81.9405	101.968	83.589	53.2241	62.6296	57.2682	50.9818	51.9917	52.8206	74.7407	86.0101	90.7284	62.3073	62.773	67.3514	57.9434	56.5542	63.8613
TUT4	8.79335	7.46329	8.56252	5.58295	3.81659	5.85698	5.2575	4.40426	5.24498	7.86402	8.31713	7.93665	6.75252	4.69424	6.37816	6.61699	5.39498	3.41884
COA7	55.3365	59.0653	51.5317	38.8148	40.2306	36.3892	29.5269	29.0574	29.1918	39.1251	47.9107	49.792	35.9111	34.2081	35.7462	25.5142	26.2928	25.5445
ZYG11B	37.6938	36.6754	39.7844	41.6328	47.9264	45.4458	44.5028	49.7359	51.7611	32.171	39.0955	36.4668	37.2002	41.9985	41.1248	36.0656	46.4464	38.7683
ZYG11A	15.7384	15.1555	15.5065	12.2293	12.6385	12.6901	10.4619	9.29191	11.1787	13.8433	15.937	15.3303	13.6892	11.0365	11.8519	12.2206	8.74358	10.063
ECHDC2	9.01738	6.41018	5.37768	12.9205	10.8867	9.27355	8.65628	8.53996	8.95355	10.4637	7.52028	7.14298	14.4872	11.6357	12.8991	10.9687	9.79777	9.99849
SCP2	73.7633	86.9038	71.2673	116.391	124.07	106.185	89.5898	88.4611	93.2441	83.1896	77.3942	80.6196	133.332	120.103	148.126	120.596	117.821	118.176
CPT2	74.6034	61.7209	60.6164	79.2247	72.0772	73.6461	66.5418	58.0073	70.5158	69.6713	66.8359	65.2058	81.4599	78.6036	82.202	80.6557	80.2425	81.7941
CZIB	30.8607	34.2487	28.2459	28.7123	29.9696	30.2611	28.4648	30.0241	27.7613	39.5151	28.7862	33.0415	31.9824	30.5625	32.6523	34.6945	33.9201	33.1563
MAGOH	30.5247	39.2395	30.6998	21.4811	23.1498	19.7944	23.3135	23.7937	20.3971	35.2906	30.9278	29.0314	21.0556	21.5735	21.3716	27.1833	24.9905	23.4803
LRP8	94.5425	110.988	125.984	56.9461	51.4301	61.0102	22.3576	22.8269	28.9269	55.0481	120.374	117.254	48.8637	54.7828	56.8322	23.1297	28.2771	28.4473
NDC1	105.352	125.731	112.2	51.948	65.1949	62.6371	42.2724	41.6793	45.5095	79.0952	99.955	103.093	42.9092	52.7853	54.5475	26.5872	32.8039	33.2208
YIPF1	42.6785	43.4977	41.2463	38.9743	42.9836	43.0054	48.2734	48.3931	49.6419	54.6582	45.8189	46.325	42.0498	48.4905	52.12	69.0313	68.0883	72.8277
DIO1	0.504077	0.641018	0.522105	1.16976	1.81444	1.95233	1.06212	1.0205	0.794694	1.16985	0.846654	0.710121	1.53466	1.99755	2.4751	2.08644	2.2324	2.77378
HSPB11	17.6427	26.5565	20.5709	14.8347	17.7065	17.0829	10.037	13.2665	12.8211	17.0279	20.9173	26.9846	19.3368	21.9231	23.8943	20.6259	20.6497	18.1908
LRRC42	35.7895	44.6424	41.2463	32.4343	30.5327	31.183	26.8716	26.2107	25.2183	30.6762	43.6774	47.787	33.0259	34.6575	32.8903	30.7004	31.3777	33.0273
TMEM59	153.071	182.507	140.446	252.456	260.154	236.286	291.18	273.977	259.176	186.787	161.811	165.333	285.693	258.583	274.023	325.484	296.166	300.664
TCEANC2	19.0429	19.6426	20.2055	15.7386	14.2653	15.8355	16.4098	14.2333	15.8939	20.3425	17.0327	17.8783	14.7328	16.3799	14.0415	14.4262	13.7665	15.546
CYB5RL	14.7303	16.346	16.6551	9.62394	8.32142	9.00239	7.59416	9.02336	9.27143	15.858	15.5884	14.9125	10.4971	11.0365	9.61483	8.76304	7.7514	8.70836
MRPL37	171.386	191.527	174.905	131.332	137.335	140.188	118.904	116.82	118.939	164.754	171.273	178.199	134.068	141.227	142.366	123.815	122.72	133.012
SSBP3	88.4375	72.2519	83.4323	77.6827	83.0265	72.7242	117.046	120.365	103.363	84.5545	89.9446	82.1652	84.8362	82.0993	74.5863	124.113	113.419	104.178
ACOT11	2.12833	1.00731	1.09642	4.04099	2.75295	3.41657	1.96492	1.45018	1.69535	1.88477	1.44429	1.58733	3.86735	3.69547	3.42707	1.84799	2.60447	2.0642
TTC4	29.5165	37.0875	31.1697	22.8635	25.2771	22.4518	23.2073	24.1697	21.8806	31.7161	33.7168	33.1251	24.1249	22.9219	27.5593	23.7258	25.7967	22.5772
PARS2	11.4818	11.172	9.13683	9.88979	10.4487	9.21932	11.7895	12.4071	10.5429	11.4386	10.2097	11.1531	10.6813	11.6857	9.99562	11.5648	13.0224	12.4497
DHCR24	652.836	635.066	687.977	747.211	750.179	863.633	814.434	777.674	828.76	573.944	759.2	695.961	825.464	918.374	942.349	1286.74	1362.01	1417.21
USP24	72.083	53.9371	74.0345	68.5905	60.5023	68.9822	69.9937	71.1126	71.3105	55.6331	76.6969	61.1957	70.3489	66.8181	61.0685	62.5931	66.476	58.3138
PLPP3	33.1011	30.0363	29.1857	23.1294	21.2728	21.096	43.5469	41.5719	36.7149	50.3687	37.7508	37.8035	24.1249	27.6161	22.4187	53.1148	49.4229	44.961
OMA1	16.0185	21.4283	18.2215	16.0045	16.8931	15.8355	15.9318	17.0262	18.8607	16.7029	18.6762	20.0087	17.8635	15.9804	23.1803	18.4203	20.3397	25.351
TACSTD2	315.048	242.809	258.442	567.015	604.523	596.761	729.411	710.643	753.847	300.328	247.771	246.955	379.123	394.017	356.653	465.037	518.042	484.056
MYSM1	33.7732	32.1425	34.9288	24.9372	23.838	27.5495	28.6241	22.0213	31.152	33.7958	36.4061	36.5504	27.0101	23.8707	32.6999	35.5887	33.8581	31.4791
JUN	468.008	385.756	466.918	708.13	754.371	785.649	848.475	931.715	822.455	162.285	193.436	119.008	222.158	359.909	272.404	244.471	323.389	268.669
LINC01135	5.48884	5.86074	4.4901	4.99807	4.44226	5.04351	4.83265	4.40426	4.07943	11.1136	4.6815	5.88983	7.05945	5.74296	6.66374	6.37854	6.6352	6.64416
FGGY	6.88905	8.24167	7.83157	13.4522	15.5166	12.9613	11.5771	10.8495	10.278	8.8389	7.7693	8.93917	12.5842	14.7819	14.1367	9.77645	10.852	13.4173
HOOK1	88.4375	69.0011	85.2597	96.7179	83.965	90.0239	81.4646	73.6908	77.7211	66.6817	79.9839	69.9261	80.4163	80.4513	79.2986	77.4963	75.2816	68.3768
CYP2J2	28.1163	27.4264	24.9566	31.2645	32.7851	33.1353	35.2624	40.3366	39.6817	44.0645	31.376	29.3656	40.8834	41.599	44.6471	52.6379	53.9498	55.7335
NFIA	19.659	19.0474	21.8762	14.622	16.5803	14.8051	15.8787	16.1131	16.1588	15.793	18.0786	14.6201	12.5842	14.1327	10.3288	13.7109	12.8983	15.03
TM2D1	21.7873	29.2121	19.3179	26.1601	26.4033	23.8618	24.2163	21.6453	24.7415	26.0618	23.5071	24.4783	27.2556	24.3202	28.7969	27.8987	25.4866	27.2217
PATJ	111.681	100.182	120.554	147.018	146.032	165.894	189.695	202.757	196.13	125.369	127.895	112.784	133.761	152.163	134.893	166.259	175.926	157.976
USP1	143.158	166.207	144.362	64.8685	64.0687	63.4506	60.0629	59.0815	59.814	132.648	138.254	146.703	65.5608	64.1214	76.1095	67.4218	65.1118	61.6036
DOCK7	73.3712	59.8894	76.1751	69.7603	61.2531	76.3577	85.9786	83.842	91.0189	56.6729	70.5213	65.0387	69.1212	69.1652	63.8291	63.7258	79.9325	75.8595
ATG4C	12.0979	16.346	14.88	7.92247	10.0733	10.087	7.00999	8.05657	8.52971	12.8034	15.1402	16.0822	9.94462	8.38971	11.8995	8.34575	9.11565	10.9016
FOXD3-AS1	2.57639	3.61718	3.18484	3.56245	3.50376	3.74196	3.61121	3.65231	3.17878	4.09449	2.49016	2.9658	3.86735	3.39584	3.09388	3.63636	3.59665	4.19292
FOXD3	1.06416	1.0531	1.14863	2.0205	1.25134	1.46424	2.07113	1.61131	1.32449	2.07974	1.29488	1.0443	1.71882	2.04749	1.18995	1.9076	2.17039	2.12871
ALG6	21.1712	29.6242	24.0168	19.1415	25.0894	20.879	15.6663	18.2078	16.4767	23.4621	24.7024	25.6479	25.4754	24.8196	26.2266	19.1952	23.1922	20.9646
ITGB3BP	26.7161	37.6369	24.1735	9.94296	9.63533	9.49048	5.73545	4.02828	4.23837	28.7264	22.7601	29.4491	9.76046	8.48959	12.0899	5.84203	5.58101	5.22502
EFCAB7	4.81674	7.14278	5.63873	4.30685	4.37969	4.28427	2.44288	2.84665	3.07282	5.5893	4.93052	6.30755	4.84953	3.9951	4.80742	3.51714	2.91453	2.12871
PGM1	57.0167	59.7063	59.6766	58.7539	60.2521	59.8171	50.3445	50.0044	46.5161	61.4174	64.8438	74.9387	70.5331	74.3089	77.5374	67.0641	77.514	74.2469
ROR1	0.840129	1.00731	0.939789	0.903906	0.563104	0.921932	1.32765	1.23534	1.43045	0.649919	0.697245	1.08607	0.736638	0.998775	0.666374	1.66915	1.73631	0.967596
CACHD1	10.8097	8.1043	9.60673	12.3888	8.25885	9.7074	8.01901	7.84173	7.2582	10.5937	10.9567	9.35689	10.5585	10.8367	7.61571	7.21312	7.93744	5.67656
RAVER2	27.2202	32.1883	26.5751	25.3625	27.029	27.7122	29.8456	28.6814	30.8341	27.8165	31.5254	28.5719	25.7209	28.4651	28.4637	29.5678	26.9129	27.8668
JAK1	133.804	146.244	154.7	351.194	390.106	353.588	239.402	259.046	238.726	145.257	177.548	153.637	363.654	438.462	373.741	211.446	243.58	226.03
AK4	145.566	136.308	134.599	163.501	150.224	154.885	142.005	131.644	143.469	126.604	137.108	132.626	146.591	156.958	154.075	122.802	131.464	134.367
DNAJC6	24.7558	23.9924	31.5351	31.4772	30.4702	36.5519	31.8636	32.9245	37.8274	21.9023	31.1768	28.9479	29.3428	35.8061	34.2707	30.9985	35.5944	34.4464
LEPROT	67.4903	71.6109	61.3473	113.892	110.368	108.3	114.443	114.672	109.456	73.1159	66.1884	71.8476	114.547	106.519	111.189	112.012	114.287	104.694
LEPR	3.36051	2.97616	3.13263	4.51953	3.44119	5.09774	4.93886	4.94136	6.03967	3.37958	2.88858	3.84301	5.15647	3.74541	4.85501	5.30551	5.20894	6.70867
MIER1	38.0298	52.5177	40.7242	35.0928	41.7948	36.9315	43.069	39.5309	38.7281	42.5047	42.8805	42.8161	39.7785	37.0546	41.696	42.6826	42.6017	37.7362
SLC35D1	29.1245	32.8293	30.5431	37.0601	39.6049	37.745	28.3055	33.4079	33.695	30.8062	34.0654	33.9187	41.4359	41.4991	40.982	28.614	33.5481	32.7047
SERBP1	543.955	555.9	576.978	519.214	556.221	542.964	516.775	523.516	534.087	488.089	561.73	538.815	509.815	531.898	546.76	503.01	516.305	517.728
GADD45A	17.3627	17.2159	17.1772	12.0698	12.0754	14.8051	19.9148	18.4764	19.5495	21.4473	16.9331	17.5024	11.909	13.883	12.1851	19.1356	19.1615	15.6751
GNG12	126.131	149.357	117.369	160.895	175.501	157.705	176.578	173.377	159.045	129.594	126.151	127.571	153.282	159.055	173.4	165.902	163.338	164.814
WLS	35.7895	33.745	33.6758	58.4349	55.8098	53.3094	47.2112	45.0631	43.6552	16.378	13.7955	16.4163	28.2378	23.7209	23.1327	13.4128	16.9291	16.9652
DEPDC1	81.7725	122.16	97.477	9.57077	9.94816	12.6901	1.27454	1.18163	2.64898	83.3846	84.8148	91.1044	8.40995	10.5371	14.8982	1.84799	2.2324	3.9994
LRRC40	30.6927	43.9098	31.3263	19.9923	24.6514	22.6145	13.0641	15.952	15.0992	32.7559	30.3799	34.5453	19.8278	20.4749	24.1799	12.3398	14.1386	15.9331
SRSF11	128.036	159.43	138.253	131.811	146.282	127.498	129.632	133.578	133.879	112.241	141.64	142.86	132.84	132.238	141.462	130.194	126.813	120.949
ANKRD13C	43.0146	49.0837	45.8408	48.226	50.0536	49.4589	60.7002	63.1635	56.9001	47.3791	49.1557	48.0376	48.9251	49.6891	51.7392	61.6393	56.3682	54.5079
HHLA3	10.1936	9.24898	12.2173	13.08	11.3872	13.5578	8.49696	9.02336	10.1721	11.5036	10.6081	10.986	10.6813	11.1363	11.6616	7.86885	6.94526	9.80497
CTH	3.08047	3.06773	3.4981	4.2005	4.37969	4.01312	2.07113	1.66502	2.91388	4.48444	3.38662	3.84301	3.92874	4.894	4.85501	3.27869	2.7905	3.54785
PTGER3	0.39206	0.641018	0.939789	1.59513	1.68931	1.57271	4.03606	3.49118	3.86751	0.909887	0.498032	0.835437	0.982184	1.09865	1.33275	2.02683	2.7905	1.9997
ZRANB2	69.3946	89.0558	75.8618	66.0383	72.2024	68.5484	59.4787	56.5571	59.708	81.3049	72.8123	77.6121	74.8302	68.2663	82.3448	62.1759	58.1665	59.2814
LRRIQ3	1.12017	0.45787	0.991999	0.903906	0.875939	1.19309	0.424848	0.644526	0.529796	1.42982	0.946261	0.877209	1.04357	1.09865	1.23755	0.71535	0.744135	0.70957
FPGT	16.5225	21.4741	15.6631	17.6527	18.1444	15.8898	12.9048	13.1591	13.2449	17.4828	16.2358	18.9226	19.6437	20.2252	20.9908	16.7511	13.7665	14.643
CRYZ	44.0787	62.5909	47.8248	40.5163	42.1702	41.3242	32.0229	31.3669	31.258	45.2344	47.9107	56.9768	50.4597	48.3907	53.2624	37.1386	31.6877	39.4779
TYW3	28.9564	37.408	28.8202	28.5528	29.3439	29.5561	25.1191	23.5789	25.0064	31.3261	30.0811	33.7516	30.3863	28.6149	33.1759	29.3294	24.9285	26.8992
ACADM	47.1592	56.547	47.8248	43.6533	41.2943	40.4023	41.6882	38.1344	40.2645	50.8887	43.4782	47.3275	47.2062	44.1459	56.023	47.4516	46.8185	47.2187
RABGGTB	32.3169	61.4004	45.9974	41.3138	47.3633	41.3242	32.0229	31.4206	32.2116	39.84	42.6315	46.7009	39.9626	37.4041	42.3624	32.4888	27.0369	30.9631
PIGK	33.6612	43.1314	37.9048	30.786	31.7841	31.3999	14.2324	13.3739	15.1522	32.7559	34.3144	42.3566	34.5606	33.9084	38.9829	16.6915	18.9754	20.8356
USP33	68.3305	85.0265	70.8496	75.9281	77.8334	72.8326	74.5608	73.7982	79.7343	79.0952	70.5213	77.1944	79.1272	75.4575	81.0597	77.6155	75.7777	75.7305
MIGA1	25.7079	25.7781	24.4345	34.827	33.0354	35.0334	38.8736	35.0192	38.1453	31.1311	25.6486	24.4365	34.3151	36.7549	42.3624	37.1386	38.633	37.3492
FUBP1	217.593	219.549	220.067	185.248	176.564	170.774	143.439	133.363	134.621	187.762	226.306	208.567	183.055	180.529	177.97	134.665	124.705	118.305
DNAJB4	2.96845	5.12815	4.64673	6.5932	10.3236	9.32778	7.75348	8.43254	11.8674	4.15948	4.7313	5.6392	7.05945	9.18873	9.13885	7.92847	7.37934	9.0309
LINC01725	0.504077	0.686805	0.835368	0.744393	0.563104	0.976163	0.79659	0.859367	1.11257	0.779903	0.747048	0.626578	1.04357	0.848959	0.999562	0.9538	1.17821	1.41914
TTLL7	5.09678	6.18125	6.78736	5.68929	5.00536	7.05007	8.33764	6.82123	9.8542	4.93939	4.6317	5.84806	4.60399	5.64308	5.94977	6.79583	5.519	7.86978
PRKACB	31.6448	38.9648	34.5633	36.1031	41.7322	39.6431	42.3786	43.9352	47.2048	28.3365	32.5713	30.201	32.2279	36.8049	41.8864	41.4903	42.6017	44.5094
SAMD13	1.34421	0.549444	0.417684	0.372197	0.437969	1.03039	2.17735	2.36326	1.48343	1.42982	0.796851	0.835437	1.04357	0.79902	0.809169	2.56334	2.60447	1.67717
DNASE2B	0.672103	0.137361	0.522105	0.212684	0.250268	0.0542313	1.43386	1.45018	0.688735	0.649919	0.249016	0.0835437	0.306933	0.149816	0.190393	2.62295	1.48827	1.54815
RPF1	45.2549	56.318	46.4673	43.2811	45.674	45.0662	45.5119	46.7818	44.4499	47.1191	44.8229	48.1212	43.9527	46.3931	48.6929	51.8629	47.5626	46.9607
GNG5	85.7491	100.548	88.9667	82.7871	90.2843	85.1974	95.9095	100.063	97.2705	86.1143	89.845	92.9423	84.0995	82.5488	80.1553	119.881	94.9392	101.146
CTBS	41.6144	45.1918	37.5393	57.7968	57.7494	55.6955	52.8405	45.9762	50.4895	48.354	36.954	43.4009	61.5093	59.3772	69.7313	60.6259	57.6084	54.3789
SSX2IP	63.5697	71.1073	64.741	36.2626	40.1055	36.6604	36.059	37.7047	35.2314	53.2284	58.718	59.3578	33.3943	33.3591	38.2689	35.0522	31.5017	33.4788
MCOLN2	6.77704	7.55486	5.89978	5.26392	5.75617	5.26044	4.62022	5.42476	5.4569	5.84927	6.77323	7.22653	6.07726	6.89155	5.90217	5.78241	5.82905	6.19261
MCOLN3	13.7781	16.2544	12.7916	11.4849	12.576	12.3105	17.7905	15.952	17.0594	14.0383	13.4967	15.2049	11.2337	10.3873	13.6131	16.2742	14.6346	11.9982
SYDE2	36.7976	38.0032	40.5153	55.2446	53.0569	57.1056	61.603	64.2914	62.8338	53.9433	50.8491	41.3123	55.3092	62.4235	55.4043	65.3353	68.5224	64.8289
C1orf52	25.988	35.4849	28.1937	20.0986	22.8995	23.211	20.1803	21.8064	21.9865	22.4872	29.6329	29.0732	21.2397	22.023	21.562	21.997	23.4402	20.513
BCL10	30.3006	34.1113	31.1697	49.6617	52.9943	58.2986	48.0078	46.0836	51.4432	38.4102	33.7168	30.7441	47.0221	47.2421	49.3593	49.0015	44.5861	44.1224
DDAH1	82.1646	75.3197	90.8984	121.442	118.064	126.847	77.8003	76.4837	81.3766	84.6195	85.9603	88.0968	124.86	124.697	130.181	79.8808	85.0794	88.8253
CCN1	72.8672	71.3362	80.1953	183.971	219.423	241.926	239.933	255.017	279.202	110.421	114.747	80.2437	155.246	216.185	155.884	213.294	226.589	228.546
ZNHIT6	15.7384	16.3918	17.0728	15.0474	16.4551	19.686	14.0731	14.0721	14.8343	15.5981	18.3774	17.4189	16.3288	16.0303	15.8978	12.9955	15.6888	13.8689
ODF2L	9.01738	11.7215	11.5385	13.1332	12.138	13.5578	10.0901	10.3661	11.0727	10.5287	11.2555	10.8607	14.61	13.4335	14.6126	10.0149	10.79	10.9661
CLCA2	1.9603	1.96884	4.28126	1.32927	1.12621	2.44041	2.07113	0.805657	3.65559	5.91426	8.16772	8.14551	3.31487	3.94516	6.28296	3.63636	9.42571	10.7081
SH3GLB1	51.1358	56.9591	49.7044	60.8807	64.1312	60.0883	65.6921	61.8744	61.4033	53.1634	51.4965	52.0895	58.8083	57.2798	62.4012	58.3607	56.4302	58.8298
SELENOF	88.6056	118.131	76.8538	96.9838	103.986	92.5186	97.0247	94.6915	87.0455	92.2885	80.3325	93.3601	96.3154	88.042	102.717	101.58	85.5135	94.8889
HS2ST1	73.1472	77.4259	74.5044	95.5482	96.541	91.2713	96.0157	96.7862	96.052	74.0258	73.5593	74.5627	97.9115	96.232	95.006	89.6572	94.3191	88.6963
LMO4	36.5176	39.5142	32.3705	43.7065	45.7991	36.3892	59.9036	61.8744	51.1783	49.7838	33.6172	34.42	39.8398	37.4541	34.1755	64.6796	60.2129	59.1524
PKN2	56.3446	67.948	60.7208	47.0563	50.7419	46.9101	48.3265	52.0991	52.1849	54.3332	59.5148	61.1122	53.7132	52.3858	57.1178	50.1341	48.5548	47.3477
GTF2B	16.5225	25.366	18.7958	23.5547	27.3418	21.7467	20.552	21.8602	19.0727	18.1327	18.3774	20.0087	25.5982	22.7221	27.131	21.8778	21.3939	21.8677
KYAT3	24.1957	29.9905	20.832	25.3094	22.2113	21.7467	23.5791	20.6785	19.8673	28.0115	25.7981	24.9796	23.7566	26.8671	27.0358	23.7854	22.262	22.7063
RBMXL1	30.7487	32.2799	32.005	24.0864	27.4044	25.9226	23.7384	24.4383	26.9666	30.1562	33.916	31.7048	26.1507	27.1167	28.5113	23.4873	25.0525	29.7374
GBP3	4.98476	5.3113	3.23705	11.0596	10.5113	9.7074	5.46992	5.1562	6.88735	4.8094	4.28307	4.97085	11.6021	9.18873	13.0895	6.79583	6.57319	6.90218
GBP1	0.39206	0.412083	0.469894	1.16976	2.06471	1.57271	1.69939	1.98729	2.43706	0.909887	0.498032	0.668349	1.04357	1.14859	0.999562	0.4769	1.17821	0.774077
GBP2	32.9891	29.9905	30.0732	37.2728	40.7937	39.2635	31.3857	29.7556	28.8739	23.852	22.6605	23.6846	19.1526	21.6734	24.5131	14.6647	15.1927	17.9328
LRRC8B	45.871	44.0013	46.624	39.2933	38.0408	36.823	35.2624	39.1549	36.5029	38.8652	47.4624	43.6098	41.9884	40.1508	42.5052	35.3502	34.6643	35.543
LRRC8C	4.70472	5.26551	4.4901	3.88148	3.81659	3.41657	2.33666	2.73923	1.96024	3.70454	4.83091	4.3025	3.99012	3.9951	4.90261	4.23249	3.8447	4.19292
LRRC8D	38.5339	35.256	37.4349	36.5816	37.0397	39.6973	36.0059	37.4899	38.834	60.4425	30.9278	36.5504	35.1131	33.9584	34.2707	35.5291	32.99	32.8338
ZNF326	20.7232	24.1298	26.4185	18.1313	21.1477	19.9029	16.4629	18.0467	15.8409	15.923	25.6486	21.6796	17.5565	19.5261	19.658	15.4993	16.805	14.643
ZNF644	37.5257	33.8366	33.6758	43.3343	41.7322	39.1008	43.7063	39.2623	47.4167	40.49	34.8622	33.1251	41.0062	37.6039	40.6964	37.1982	37.6408	36.0591
CDC7	22.4034	31.3641	25.8964	10.5278	11.1369	11.3343	2.28356	3.38376	3.76155	18.1327	24.6028	24.896	11.4793	11.5858	12.1851	4.05365	5.39498	4.70897
TGFBR3	1.17618	1.19046	1.46189	3.72197	3.94172	3.68773	1.7525	2.14842	1.58939	2.14473	2.53996	1.87973	7.79609	8.58947	6.61615	1.66915	2.29442	1.87069
BRDT	0.112017	0.274722	0	0.265855	0.187701	0.216925	1.06212	0.537105	0.953633	0	0.0498032	0.0417718	0.122773	0.0499388	0.380785	1.31148	1.17821	1.16112
EPHX4	4.98476	4.945	3.39368	8.72003	7.07008	6.61622	14.1262	11.3866	11.7085	4.15948	4.7313	4.26073	7.61193	7.79045	7.28252	15.9762	16.743	15.417
BTBD8	6.32897	5.35708	7.04841	5.47661	5.06793	5.69429	4.88575	5.53218	5.4569	5.84927	7.57008	7.89488	6.69113	6.59192	6.61615	7.03428	6.94526	7.22472
GLMN	8.79335	11.5383	9.39789	7.60344	7.07008	7.91777	6.69136	6.55268	7.89396	8.64392	9.66182	10.7771	7.61193	7.79045	10.0908	10.1937	9.79777	10.7726
RPAP2	13.162	16.8038	18.7958	18.3971	17.1434	16.4863	15.6663	16.4891	15.9469	15.4031	17.7299	15.8733	17.8021	17.3288	17.8493	18.4799	17.9833	19.4164
GFI1	3.80858	3.20509	3.4981	2.12684	1.37648	2.00656	1.38076	0.698236	1.00661	2.53468	2.93839	3.59238	1.78021	1.34835	1.38035	0.9538	0.49609	0.645064
EVI5	10.8097	10.8515	10.5465	19.7796	16.3926	20.5537	21.6141	23.3103	21.8276	9.94376	11.6041	9.39866	20.5645	19.6759	20.6576	21.8182	19.0374	19.6099
RPL5	502.901	603.29	466.292	478.326	567.358	464.816	501.639	514.815	487.942	585.057	472.881	497.043	534.063	477.764	536.193	534.009	500.12	505.988
DIPK1A	13.8901	16.117	16.133	14.0903	18.207	16.4321	13.2234	14.663	15.7879	9.94376	12.4508	14.5366	11.111	14.3824	16.8498	11.9225	13.2704	12.3852
MTF2	27.3882	35.5765	28.6113	24.7777	29.7819	26.7903	22.7825	23.7937	23.8938	25.7368	27.9894	30.4934	27.0101	25.8683	29.0825	20.9836	19.2235	20.3195
TMED5	62.5616	85.7133	78.7334	77.5232	78.5217	73.863	66.117	65.473	66.2775	66.6167	72.8621	77.1526	78.6361	76.1067	87.6758	72.6081	73.2352	71.9246
CCDC18	6.32897	8.01273	8.14483	2.07367	2.00215	1.95233	0.53106	0.429684	0.900653	4.41945	6.87284	6.85058	1.65744	1.44822	2.33231	1.13264	0.744135	0.580558
CCDC18-AS1	1.51223	2.4725	1.67074	2.28635	1.75188	2.16925	2.33666	1.50389	2.54302	5.45932	2.34075	3.34175	3.37626	1.69792	3.04628	2.8614	1.17821	1.61266
DR1	49.2315	59.6147	56.2307	36.5284	42.1702	44.09	42.3786	46.9429	45.7744	40.49	51.0483	54.6376	34.8062	41.9486	41.2676	40.0596	44.6481	43.2193
FNBP1L	57.1848	61.5378	67.9258	63.6456	73.4537	82.3231	80.1901	96.0343	98.542	64.017	65.9394	64.4122	63.9647	71.3126	75.4907	67.6006	83.8392	83.7938
BCAR3	21.3953	18.7727	24.8522	22.4381	24.4637	29.6645	41.2634	41.0348	42.1188	18.5227	19.1742	19.215	18.0476	23.4213	19.896	36.9598	43.5939	43.4773
DNTTIP2	50.7438	63.0945	49.7566	44.3977	45.2985	39.4262	42.2724	38.3493	35.9202	41.1399	50.8491	49.3743	43.2775	41.4492	47.4554	39.4039	34.1682	37.6717
GCLM	26.436	34.3861	34.8244	24.2459	29.8445	28.363	18.6933	20.6248	20.662	17.5478	33.916	31.3289	24.6774	31.2617	28.5113	18.4799	21.7659	19.4164
ABCA4	0.336051	0.228935	0.365473	1.06342	1.12621	1.41001	2.54909	2.52439	1.48343	0.0649919	0.348622	0.292403	0.675252	0.39951	0.713973	1.07303	0.558101	1.09661
ARHGAP29	43.6867	50.1368	42.4471	60.8275	60.3772	61.1729	66.9667	58.1684	59.602	35.2256	40.0916	36.5921	39.8398	43.6465	41.8388	40.2385	35.5324	33.1563
ABCD3	65.306	84.6602	76.1229	69.4944	74.142	67.0841	58.5228	58.1684	61.1914	57.8428	74.8542	75.2728	69.3668	73.0105	78.6322	67.2429	73.1732	69.8604
F3	2.12833	3.93768	3.39368	2.9244	3.81659	2.7658	5.52303	4.40426	4.13241	2.72966	3.33681	2.84048	2.45546	2.79657	2.7131	4.11326	3.53464	4.0639
SLC44A3	2.07232	2.93037	1.82737	3.56245	4.69253	3.36234	2.81462	3.81344	3.17878	2.66467	3.38662	2.6734	3.86735	4.54443	4.09344	4.2921	5.64302	5.74107
ALG14	8.28927	8.74532	6.52631	6.75271	5.75617	4.77235	4.30159	3.65231	3.76155	7.92901	6.02619	8.93917	7.55054	6.59192	7.7109	4.88823	4.46481	5.87008
TLCD4	14.0021	15.8423	12.4261	6.91222	8.00858	8.46008	12.7454	13.2665	11.3376	12.4135	15.3892	14.4948	7.79609	9.18873	9.61483	13.5917	12.9603	12.1917
RWDD3	6.44099	10.6684	8.71915	6.85905	7.75832	6.83314	6.74446	5.96186	6.67543	9.03388	7.8689	9.85815	6.50697	6.24235	7.28252	7.57079	6.26313	6.32163
PTBP2	15.6264	19.2306	13.888	11.1127	10.0733	9.00239	5.84166	5.85444	7.73502	13.5183	16.0366	16.1239	9.26936	10.2874	11.614	7.21312	6.88325	8.12781
SNX7	29.1805	38.4611	31.1174	31.3708	35.5381	33.0269	29.3676	30.7761	29.7215	26.4517	34.165	34.5035	29.8338	33.7586	35.0323	29.7466	28.8352	30.06
PLPPR5	6.77704	7.14278	6.68294	8.66686	10.699	9.32778	7.0631	7.73431	6.35755	6.75916	5.77717	6.43286	8.96243	10.1875	10.2336	6.6766	6.94526	6.83768
FRRS1	4.53669	6.18125	6.10863	2.97757	2.50268	3.57927	1.27454	1.34276	1.74833	5.97926	5.12973	6.01514	4.17428	5.44332	4.80742	1.9076	1.17821	2.90279
AGL	49.1195	48.0306	51.4795	46.9499	39.5424	43.9816	32.9788	32.0114	37.4566	43.0246	47.313	41.6047	48.6181	47.0423	48.7405	30.3428	35.9665	33.9304
SLC35A3	74.4914	87.4532	76.1751	104.8	105.738	105.805	108.602	99.9015	109.35	87.9341	79.8843	82.7082	115.468	117.955	141.747	129.478	135.681	134.883
MFSD14A	56.1206	66.2996	53.4635	51.2036	52.9943	54.8821	52.8405	54.7847	53.7213	58.2977	57.3733	58.1046	55.6776	57.6293	60.8781	59.3741	56.0581	62.9582
SASS6	14.0582	16.8038	14.4623	6.54002	6.88238	6.29083	2.70841	3.27634	2.54302	14.6232	14.4429	14.0771	5.4634	5.69302	7.94889	2.80179	3.78268	4.25742
TRMT13	6.553	9.43213	7.88378	6.75271	6.069	6.88737	6.31962	5.26363	5.61584	7.08412	9.01438	8.64677	6.44558	5.94271	8.09169	5.66319	6.0771	6.38613
DBT	25.3159	28.2506	23.4947	30.8923	32.0969	33.298	34.5189	30.9372	35.6023	32.041	24.4534	26.734	35.2359	39.8511	39.3161	37.4367	40.5553	42.0582
RTCA-AS1	1.73627	0.915741	1.25305	2.44586	1.25134	2.00656	1.54007	0.966788	0.900653	2.46969	1.64351	1.16961	2.88517	2.19731	2.37991	1.49031	1.17821	1.74167
RTCA	20.2751	22.8935	25.2177	27.0108	31.7841	30.5865	22.6232	22.6121	23.0991	18.0028	22.2122	24.3112	26.4576	27.0169	30.1296	19.9106	24.4324	22.3192
CDC14A	13.05	13.1409	13.4703	13.2927	12.0754	12.7444	6.37272	5.6396	6.72841	13.5833	13.9449	13.9518	16.4516	17.3288	16.9449	7.21312	6.38716	7.35373
EXTL2	7.67317	11.9962	8.4581	6.11466	6.38184	4.88082	3.61121	3.11521	4.23837	9.87877	8.51635	11.1113	7.36638	6.39216	6.99693	3.15946	2.97654	3.87038
SLC30A7	24.8118	23.5803	22.0328	28.7655	33.7236	29.1222	30.058	28.8962	27.1255	23.852	27.6906	24.4365	32.3507	32.5601	33.8423	29.4486	32.2458	27.0282
DPH5	14.4502	21.932	17.1772	11.0596	13.7648	13.4494	10.4088	14.3407	11.8144	16.7679	13.9449	19.0897	11.7248	12.1351	14.7554	12.5782	10.7279	14.2559
RNPC3	5.48884	7.50907	6.63073	4.5727	5.81874	4.82659	5.04507	4.45797	5.7218	5.84927	5.82697	6.93412	6.69113	5.59314	6.04497	5.7228	4.9609	4.25742
LINC01661	1.23219	0.595231	1.09642	1.91415	0.938506	0.867701	2.92083	2.47068	2.0662	1.6248	0.996064	0.835437	1.78021	1.04871	1.76113	3.51714	2.91453	2.83828
PRMT6	379.178	365.197	332.163	336.147	356.632	329.238	330.957	350.138	316.553	321.515	340.106	337.851	334.188	327.698	338.042	331.207	336.783	333.692
VAV3	77.9079	100.274	79.3599	103.896	120.942	110.306	76.9506	90.1799	92.6083	97.6178	74.6052	79.7842	96.2541	105.82	109.523	56.0358	66.476	67.6027
NBPF4	1.84828	1.83148	2.14063	2.9244	2.50268	1.46424	0.26553	0.322263	0.476816	2.85964	2.04193	2.92403	2.88517	3.79535	2.09432	0.357675	0.558101	0.451545
NBPF6	1.56824	1.28204	1.93179	2.5522	2.12728	1.24732	0.106212	0.214842	0.370857	1.75478	1.34469	2.17214	2.76239	2.39706	2.09432	0.357675	0.372067	0.129013
FAM102B	527.881	593.446	621.096	247.351	268.225	290.029	311.254	371.73	439.572	524.875	543.95	641.031	244.011	268.271	295.204	264.024	365.432	405.745
HENMT1	79.5882	101.876	85.6252	65.932	71.1387	65.5114	66.9136	67.6215	69.0324	92.3535	83.5199	89.8094	65.8677	67.2176	77.0614	67.1833	70.1347	76.8916
PRPF38B	93.9264	119.413	107.136	75.1837	91.4105	78.1473	67.2322	82.4993	78.3038	75.3906	119.279	102.633	76.6104	82.0494	84.582	68.0775	74.0414	65.7965
STXBP3	82.5006	97.0227	78.9422	91.1881	100.045	90.729	84.3324	86.2053	89.3766	76.6255	84.8148	84.8386	93.062	90.9385	103.907	98.301	94.7531	91.4701
AKNAD1	0.280043	0.869954	0.417684	0.903906	1.37648	1.03039	0.637272	1.12792	0.847673	0.519935	0.597638	0.417718	0.245546	0.599265	1.04716	0.4769	0.868157	0.516051
GPSM2	125.907	149.998	153.029	36.1031	41.4194	44.5781	31.2263	33.6227	37.6685	126.669	139.2	138.39	31.9824	38.1532	46.1702	24.5007	29.3933	31.2211
CLCC1	65.53	73.534	68.0303	82.2554	89.5335	83.0823	75.0919	77.6116	75.9727	68.5665	79.8345	72.0564	90.3609	95.1333	95.1487	84.7094	90.5364	80.375
WDR47	26.5481	27.0143	28.2459	38.6553	37.6028	40.0769	32.6602	35.986	33.642	29.0514	28.6866	28.9897	42.3567	44.6453	36.6506	34.9329	35.5324	27.0927
TAF13	31.7009	41.8951	35.6075	59.2856	67.8853	62.366	40.9447	43.774	47.3108	31.1311	37.7508	39.5997	68.139	68.7157	72.492	50.2534	51.0352	50.1215
TMEM167B	71.0749	80.4478	68.5524	118.358	112.058	107.053	103.397	97.9679	98.595	93.1334	75.7008	78.907	133.332	122.4	138.32	139.851	117.883	124.691
CELSR2	295.333	209.888	345.425	808.889	556.659	735.376	209.078	219.622	203.918	239.755	282.832	247.749	670.157	574.795	470.841	164.173	165.384	151.397
PSRC1	69.3946	92.3067	83.7978	9.67711	10.8241	12.2563	9.13423	7.57317	9.53633	72.141	76.5475	85.0057	10.2515	11.7855	12.3755	8.46498	8.68157	10.192
SORT1	233.724	210.712	238.759	253.785	247.64	271.97	309.608	302.927	310.037	212.913	244.982	209.945	237.566	267.522	249.414	249.359	315.823	286.537
PSMA5	214.681	301.004	222.834	195.297	216.857	191.87	182.95	186.322	185.217	204.335	223.865	243.488	196.928	204.499	218.285	201.55	198.064	197.583
ATXN7L2	11.0897	11.5841	13.9924	11.2722	10.8867	13.3409	12.2144	12.7294	11.3376	11.5036	12.2018	14.0353	12.2159	11.7855	9.75763	11.5052	10.976	11.6112
CYB561D1	43.8547	36.1718	42.0294	69.5476	64.4441	66.9756	81.6239	72.5628	67.3371	43.9995	39.9422	41.5212	69.8579	66.6183	59.2597	70.3428	72.057	73.0212
AMIGO1	17.6987	16.117	17.7516	29.1908	27.029	30.6949	44.4497	45.1705	39.5758	14.3632	16.7339	15.8315	27.4398	29.364	24.2275	36.1252	44.09	40.639
GNAI3	253.663	312.588	264.603	214.917	245.325	232.056	235.578	241.59	233.852	241.51	267.991	270.431	211.231	223.626	238.038	197.079	209.908	216.29
AMPD2	43.2386	42.8567	52.4193	71.9934	72.7029	77.2796	39.2453	45.3316	45.0326	37.2404	51.6957	47.5781	62.4301	68.5659	58.2602	33.0253	38.3229	39.2844
GSTM4	61.3854	48.58	48.9734	84.8076	75.581	71.9649	164.788	143.407	121.376	56.9979	48.6079	48.5806	55.432	52.7353	49.2641	73.085	63.3135	64.8289
GSTM3	242.517	284.612	204.874	289.25	317.716	321.049	460.057	448.751	443.651	213.303	211.614	199.461	255.368	250.892	284.113	345.633	360.285	380.91
CSF1	1.51223	1.0531	1.04421	1.22293	0.625671	1.24732	1.91182	1.66502	1.37747	0.389951	0.448229	0.584806	0.552479	0.349571	0.52358	0.596125	0.868157	1.16112
AHCYL1	264.977	248.99	266.065	286.538	270.728	271.645	295.854	293.581	290.487	249.439	253.697	256.396	269.487	266.074	277.259	251.803	270.803	265.96
STRIP1	44.6388	42.5819	50.4353	50.8846	51.1173	51.7909	50.8225	56.1274	58.1716	46.1443	50.7494	43.6516	46.224	55.8315	45.6466	46.4382	56.1202	51.9276
SLC6A17	1.73627	0.732592	0.626526	2.18001	1.50161	1.46424	1.85871	1.61131	2.3311	2.01475	1.4941	1.08607	2.45546	2.69669	1.90393	2.50373	3.47263	2.90279
RBM15	29.2365	25.7323	31.2741	25.6284	24.0257	27.3326	24.6943	23.3103	23.47	25.9968	27.7404	26.358	24.8615	23.7209	19.4677	22.1162	21.7659	19.739
LAMTOR5-AS1	3.19249	3.47981	3.4981	2.33952	2.37755	2.65733	1.59318	2.041	1.96024	4.74441	3.58583	4.67845	2.51685	2.39706	3.56986	2.26528	2.2324	3.09631
SLC16A4	1.00815	1.23625	1.30526	3.03074	2.87808	3.6335	0.902802	1.87987	2.49004	2.07974	1.64351	2.21391	3.80596	2.69669	3.61746	0.596125	1.79833	2.0642
LAMTOR5	99.3592	117.993	91.2117	98.0472	105.425	96.7486	97.3433	94.5841	96.2639	107.952	99.6562	107.354	96.9907	93.8349	103.478	100.089	97.2956	107.79
LRIF1	24.1397	29.7158	26.9928	33.7635	40.2306	38.5585	40.5199	43.9889	40.3175	28.6614	32.1231	30.0339	37.5685	41.1995	38.0309	39.0462	41.1754	33.0918
DRAM2	47.6073	59.7063	46.2063	48.8109	46.5499	43.3308	39.9357	36.0934	35.3904	53.0984	47.4624	56.6008	54.2657	44.8949	53.4527	41.3711	37.4548	37.8653
CEPT1	34.7813	47.5727	40.3587	27.3299	34.4744	34.925	27.7744	34.321	33.1122	35.4206	39.5437	42.5237	34.4378	38.4029	38.2689	31.535	36.0285	36.8332
DENND2D	64.6339	68.0395	65.6808	74.2798	86.0297	90.9459	92.6169	102.748	103.522	68.4365	68.828	72.14	82.6262	89.69	93.1972	86.7958	105.171	110.177
PIFO	1.12017	0.595231	0.469894	0.903906	1.37648	1.35578	2.23045	2.95408	2.38408	0.714911	0.647441	0.501262	0.982184	1.24847	0.761571	1.4307	1.36425	1.48365
OVGP1	2.74442	2.42671	1.87958	4.5727	4.37969	4.28427	6.85068	5.53218	5.77477	5.00438	2.09173	1.71265	4.17428	3.44577	3.71266	3.27869	4.4028	4.57995
WDR77	41.7824	52.5635	53.2025	43.8128	52.1184	45.6085	32.0229	35.2878	37.1387	25.6718	47.6617	52.6743	38.121	44.1459	42.7432	27.2429	30.0134	30.6405
ATP5PB	284.636	358.238	274.209	261.654	296.756	271.156	235.207	235.628	247.627	306.892	277.503	308.569	275.012	282.504	308.674	259.553	262.059	287.505
RAP1A	98.5191	119.642	110.373	100.918	104.049	103.094	86.138	86.5276	88.6878	106.457	102.495	119.927	106.076	106.569	119.519	97.3472	103.001	102.372
INKA2	18.2028	16.0255	16.4463	9.62394	10.261	10.5209	13.4889	10.7421	14.9402	18.3277	16.3354	16.7087	12.8912	12.6844	13.4227	16.2742	18.1073	16.8362
DDX20	58.0249	62.7282	52.9414	42.8026	42.2953	41.975	33.563	35.7175	34.8076	48.094	53.4388	57.1021	35.727	42.1983	42.41	34.8733	37.8268	35.285
KCND3	3.08047	1.87727	2.45389	18.5567	10.8867	13.6663	9.08113	7.84173	7.73502	3.1846	3.28701	2.38099	23.2655	16.8294	18.2301	10.5514	10.852	9.28892
LINC01750	1.17618	0.595231	0.835368	2.60538	2.37755	3.09118	1.69939	1.61131	1.53641	0.974879	0.846654	1.21138	4.1129	3.04626	4.71222	2.3845	1.98436	2.51575
CTTNBP2NL	52.536	40.5215	51.3229	47.8007	50.4916	50.4893	68.7723	70.307	69.7741	44.5195	54.0863	50.0844	47.329	50.1885	49.0737	54.1878	58.1665	53.2178
WNT2B	39.8221	15.8423	26.2097	4.73221	2.87808	4.71812	24.4819	15.4686	20.768	37.8903	21.8138	27.4023	5.4634	4.19486	5.56899	28.3756	17.6732	24.7705
ST7L	27.9483	24.6334	25.6876	15.5259	18.3321	16.2152	18.6933	18.2078	20.2912	27.8165	22.9593	24.9796	16.7585	15.481	19.8008	21.8182	19.4095	22.3837
CAPZA1	339.636	394.776	328.561	308.817	340.552	316.168	303.448	322.8	318.884	358.17	335.325	349.38	313.501	327.548	346.991	321.967	337.837	333.369
MOV10	151.447	107.05	146.868	148.347	135.082	153.258	151.458	153.021	173.455	125.304	132.227	125.232	124.369	135.284	116.996	118.629	149.137	148.365
RHOC	481.618	448.072	417.527	658.097	713.577	667.641	758.885	775.149	734.35	412.114	418.895	410.575	588.144	608.104	589.075	635.887	650.064	683.123
PPM1J	25.0358	20.9247	20.9886	36.6879	34.1616	32.6472	17.1532	16.704	15.3641	24.112	20.9173	22.4315	38.8577	32.9096	31.8432	18.4799	18.1693	16.9007
LRIG2	24.6998	22.6188	23.1815	20.9493	16.3926	19.686	22.1452	19.8192	21.4567	23.722	24.304	21.0112	18.5387	17.8281	16.707	20.6855	21.0218	17.2877
MAGI3	111.625	92.9477	115.594	99.855	83.0265	104.666	141.103	122.836	141.561	85.2694	95.0743	88.5563	84.4065	85.8947	84.7247	106.826	118.255	105.92
PHTF1	100.255	131.821	114.602	103.045	122.882	114.265	72.4366	82.9289	80.1581	73.8308	112.356	119.175	103.682	109.715	109	74.3368	79.2503	80.375
RSBN1	92.5262	85.576	82.5448	86.4028	83.2142	86.4447	116.037	123.051	113.323	95.5381	91.8371	89.3082	90.9748	93.3855	83.1064	116.125	122.472	109.661
PTPN22	0.728111	1.00731	0.574315	0.425367	0.437969	0.271156	0.53106	0.429684	0.211918	0.714911	1.14547	1.08607	0.613865	0.599265	0.475982	0.4769	0.620112	0.258026
AP4B1-AS1	14.8423	16.346	15.9764	15.8449	16.0797	15.7813	22.9418	22.7195	22.6223	18.1327	16.9331	16.8758	18.109	16.6795	18.7061	22.5335	23.9363	19.8035
AP4B1	83.2287	101.464	92.2037	79.8627	87.3436	82.6485	49.07	53.8179	54.41	73.0509	89.7951	95.8664	79.3728	81.6998	86.5811	51.8629	57.6084	57.3462
DCLRE1B	206.336	216.161	201.689	113.095	100.67	104.449	80.5087	72.7777	75.7608	143.567	189.601	194.699	92.3253	98.9287	109.809	77.9136	72.9872	74.4404
HIPK1-AS1	1.00815	0.915741	0.574315	0.691222	0.938506	0.867701	0.53106	0.805657	1.00661	1.23485	0.498032	0.877209	1.3505	0.699143	0.999562	1.19225	0.868157	0.90309
HIPK1	807.868	645.506	899.064	752.954	719.396	836.68	729.517	801.736	821.766	616.708	904.326	741.199	736.393	841.568	726.729	642.981	811.355	722.73
OLFML3	0.560086	0.549444	0.887578	5.52978	7.25778	5.42313	2.07113	1.93358	2.17216	0.649919	0.498032	0.793665	4.60399	4.59437	3.80785	0.655738	0.992179	1.09661
TRIM33	594.531	458.237	583.452	587.379	527.691	592.694	680.872	663.27	695.516	532.999	624.333	509.867	564.879	600.014	530.148	634.218	731.608	614.423
BCAS2	340.028	415.838	329.761	325.353	362.951	336.559	308.334	308.298	312.95	445.909	327.456	338.644	339.897	340.083	364.507	329.598	317.807	327.886
DENND2C	12.3779	10.76	10.181	25.5752	19.1455	18.3302	16.3035	14.6092	16.6356	15.2081	13.4469	15.0796	22.8972	24.1704	24.7035	19.076	22.386	20.1905
AMPD1	0.728111	0.595231	0.417684	0.903906	0.875939	0.705007	1.64629	1.28905	0.794694	0.909887	0.796851	0.668349	1.04357	0.848959	0.856767	1.13264	1.79833	0.967596
NRAS	681.176	878.928	733.557	585.89	621.666	613.627	628.138	626.64	645.715	679.945	695.203	740.489	593.915	583.484	682.748	555.291	548.923	566.302
CSDE1	2901.8	2845.34	2909.79	3170.05	3385.38	3189.4	3404.47	3296.48	3400.71	3215.99	2925.24	2717.17	3313.28	3236.38	3310.5	3471.83	3428.85	3348.98
SIKE1	271.138	322.02	278.177	221.085	248.767	238.13	259.688	253.352	266.487	290.124	275.959	299.671	234.926	235.861	266.169	256.751	263.858	267.185
VANGL1	255.007	223.67	257.293	256.975	256.963	278.261	284.33	310.5	308.023	193.871	254.395	223.939	205.154	242.353	206.909	209.061	244.944	234.545
SLC22A15	1.2882	0.77838	1.35747	4.73221	3.94172	5.64005	1.00901	1.87987	1.58939	1.42982	1.74311	1.54556	10.006	7.14124	8.23448	2.08644	2.17039	1.48365
MAB21L3	0.952146	0.228935	0.156631	0.58488	0.312835	0.596544	0.477954	0.322263	0.317878	1.29984	0.796851	0.710121	1.3505	0.599265	1.33275	0.655738	1.05419	0.774077
ATP1A1	1087.01	954.522	1069.11	995.041	984.868	991.565	1111.51	1104.34	1138.11	1070.35	1164.75	1010.75	1028.35	1075.53	922.453	1149.21	1290.58	1215.24
ATP1A1-AS1	7.00107	7.50907	6.31747	4.83855	6.38184	5.85698	9.13423	10.205	8.84759	10.5287	6.97245	7.18476	7.48915	6.34222	7.09213	12.8763	8.99163	9.93399
LINC01762	0.336051	0.228935	0.261052	0.212684	0.375402	0.488082	1.96492	1.18163	1.80131	0.32496	0.547835	0.417718	0.18416	0.299633	0.380785	2.44411	1.73631	1.74167
CD58	22.5154	31.9136	20.5187	35.6245	33.4108	28.363	19.7554	19.2283	19.5495	21.4473	23.8059	27.1935	36.0339	30.3628	33.1759	21.5201	17.6112	19.6745
IGSF3	437.651	395.646	466.866	644.432	626.859	764.01	820.86	836.809	923.911	406.914	480.651	390.734	567.273	657.693	549.14	625.157	788.597	740.404
PTGFRN	247.222	195.511	262.358	318.388	299.383	329.401	349.013	345.036	331.652	212.199	260.52	214.039	281.948	312.567	264.027	308.137	349.619	302.47
CD101	0.896137	0.686805	1.04421	2.18001	2.12728	2.54887	1.64629	1.39647	1.53641	1.16985	1.34469	0.751893	2.76239	2.69669	3.61746	1.9076	1.55028	1.67717
TTF2	189.589	199.265	223.722	87.3067	85.1538	91.7051	43.8656	49.3062	51.4962	129.594	192.938	181.248	71.8836	83.8472	79.6793	35.6483	47.3766	41.3486
TRIM45	32.933	33.1956	33.2581	21.4279	20.3343	21.8552	23.4198	20.6248	21.7746	46.2742	30.7286	34.0023	23.3883	22.023	21.8476	22.4739	23.9363	22.2547
VTCN1	3.69657	2.65565	3.75915	27.5957	21.1477	16.0525	16.6753	19.2821	14.3045	5.39433	4.6317	4.63667	23.1427	25.4688	16.8498	7.57079	10.1698	8.83738
MAN1A2	267.105	249.31	259.173	388.467	355.131	379.619	341.578	321.565	346.222	255.613	269.236	251.007	407.668	398.411	431.573	358.927	387.694	368.977
TENT5C	68.1624	78.4332	88.1313	98.3131	98.7308	110.578	36.3245	38.7252	44.6088	76.8204	88.2014	89.3082	114.118	121.401	133.275	51.386	76.5839	73.1503
GDAP2	36.9097	47.2522	42.1861	41.8987	47.113	50.5978	43.5469	47.9634	41.8009	33.8608	43.9264	39.8503	42.725	46.2932	45.4563	43.3383	46.1363	39.6714
WDR3	107.2	110.621	107.815	91.0818	96.9164	90.2409	66.0108	71.4886	71.7344	88.649	105.832	98.2891	85.8183	87.6925	92.5784	57.9434	61.019	58.3783
WARS2	27.8363	30.8605	25.3743	28.6591	28.8434	25.9768	31.3325	27.6609	26.7017	31.0011	26.4953	26.0656	26.7031	27.766	29.6537	32.8465	25.5486	26.5766
WARS2-AS1	7.8412	7.92116	9.4501	9.09223	12.2631	8.73124	10.3557	9.82901	10.5959	9.81378	7.12186	8.43791	9.82184	10.3373	10.0432	10.7303	11.224	9.86948
ZNF697	16.2985	13.8277	17.125	21.1089	19.3958	19.7944	19.0651	20.6785	20.2382	20.2125	20.4691	16.4581	23.2041	22.7221	20.6576	23.6066	22.8201	23.4803
PHGDH	313.984	247.296	228.995	101.131	107.49	91.922	81.3584	78.3098	69.8271	628.017	281.039	285.26	136.831	138.081	131.514	97.4069	100.706	105.984
HMGCS2	0.336051	0.0915741	0.0522105	2.9244	1.37648	0.379619	3.08015	1.45018	1.05959	0.649919	0.747048	0.334175	6.13865	2.49694	1.33275	8.52459	3.72067	4.12841
NOTCH2	489.907	320.28	503.205	620.983	504.916	608.421	408.12	420.714	477.929	374.613	532.645	407.818	674.515	692.75	558.136	390.164	515.189	483.862
SEC22B	296.285	301.874	293.162	417.179	443.35	427.505	403.765	402.882	417.479	325.414	335.275	331	461.627	479.812	500.304	500.984	526.413	517.728
NBPF26	38.7579	29.2579	45.4753	48.5982	42.9836	51.5197	38.6612	40.068	50.3306	36.7204	47.0142	34.6289	59.0538	61.5745	47.0746	40.0596	43.7179	37.6072
LINC00623	6.88905	8.4706	7.30947	10.3152	12.0129	10.1955	10.3026	9.50675	9.00653	15.2731	10.8073	10.1923	16.6357	15.1314	15.3742	13.7109	13.0224	12.1917
FAM72B	27.3322	40.8878	40.8286	3.45611	3.62889	4.98928	1.69939	1.5576	1.90727	24.5669	31.0274	33.501	2.08714	4.84406	5.37859	1.60954	2.29442	1.80618
SRGAP2C	53.1521	53.9829	62.8092	35.7309	38.1659	41.8666	64.5769	63.7543	62.7278	48.9389	63.1006	51.8388	35.1131	35.8061	37.1266	49.8957	53.0196	49.7989
LINC02798	1.34421	0.549444	1.30526	0.850735	0.437969	0.596544	2.28356	2.041	1.74833	1.42982	0.996064	1.21138	0.491092	0.749081	0.618776	1.9076	2.72849	2.19322
LINC02591	2.57639	1.83148	1.93179	3.24343	3.56632	3.14542	2.60219	2.68552	2.22514	3.37958	2.34075	2.29745	3.80596	3.49571	4.04584	3.21908	3.34861	4.12841
FAM72C	17.7547	26.2818	27.5671	2.28635	3.25349	2.82003	0.53106	0.483394	1.16555	16.378	22.6106	23.0998	2.76239	3.19608	2.76069	0.774963	1.17821	0.70957
LINC02802	3.02446	3.11352	1.87958	4.51953	4.12943	3.30811	4.56712	4.6191	3.44367	3.31459	3.0878	2.75694	4.66538	4.59437	4.75982	4.70939	5.39498	4.70897
NBPF15	72.2511	72.023	81.4483	60.2958	52.3061	56.2379	53.3715	49.897	58.4895	66.6167	67.4833	72.8919	64.8855	57.929	65.3047	57.5857	51.9034	61.4101
SRGAP2B	52.6481	53.2961	60.4597	33.8167	33.2857	40.7277	61.8154	62.9487	63.4695	53.7483	61.6563	56.6844	31.3685	35.4565	33.5567	48.0477	54.8179	50.6375
FAM72D	21.6193	29.3037	33.9368	2.71172	3.25349	4.06735	0.26553	0.644526	1.05959	18.3927	24.0549	27.0264	2.14853	4.19486	3.52226	0.834575	1.24022	1.29013
NBPF20	10.9777	9.98157	13.3659	13.7181	12.5134	12.3105	11.6302	13.5887	13.8277	10.7887	12.9488	11.5708	15.7763	14.5322	11.3284	15.4396	14.2006	14.1269
GPR89A	67.0983	82.0504	64.7932	65.0812	69.1992	61.0102	50.2383	51.2935	53.8802	63.6921	71.9656	76.2754	75.2599	75.4575	79.6317	61.3413	64.1816	63.7968
PDZK1	52.088	65.7502	81.1351	41.4733	42.7333	43.8731	2.54909	2.20213	2.38408	50.0438	49.1059	78.8652	70.9014	57.7791	81.7737	1.84799	0.744135	1.61266
RNF115	115.434	129.394	116.951	133.14	143.591	126.034	102.601	107.421	100.926	111.266	106.529	114.998	128.175	128.542	132.751	98.8972	91.5906	88.8253
POLR3C	76.6757	86.1712	73.8256	75.0242	79.6479	76.6288	61.2312	66.8158	65.6947	82.4747	72.5632	76.2336	73.9707	72.3613	75.5859	62.3547	59.4688	57.4752
NUDT17	6.38498	6.27282	6.26526	5.26392	4.12943	4.77235	2.60219	3.27634	3.54963	6.95413	5.12973	6.59995	5.15647	4.94394	4.95021	2.32489	2.41844	2.83828
PIAS3	287.94	256.133	286.897	322.854	313.336	303.749	285.445	300.94	313.427	242.55	308.232	277.24	304.661	312.367	292.538	276.006	297.158	294.988
ANKRD35	1.2882	0.961528	1.984	5.52978	4.31713	5.42313	14.02	14.5018	11.0727	2.59968	2.04193	1.87973	4.23567	5.04381	3.90305	7.51118	10.6659	9.0309
PEX11B	54.9444	61.1715	49.0256	50.1934	58.9382	54.6109	58.1511	58.813	55.4696	57.5828	49.9028	53.5097	55.0023	60.0264	63.02	65.5738	61.8872	72.2472
RBM8A	346.693	347.798	329.396	287.814	310.708	287.48	309.927	317.16	297.904	386.572	327.605	323.815	299.628	280.206	298.107	306.587	290.709	291.762
LIX1L-AS1	1.17618	2.06042	1.93179	1.70147	1.12621	1.35578	0.79659	1.61131	1.48343	3.31459	1.64351	1.9215	1.53466	1.19853	1.42795	2.02683	1.61229	1.93519
LIX1L	2.18433	1.83148	1.77516	1.54196	1.56418	1.19309	2.60219	1.82616	1.80131	3.76953	1.74311	2.00505	0.920798	1.24847	1.04716	2.32489	1.48827	1.93519
ANKRD34A	21.8994	20.4668	24.6433	14.0371	17.5813	19.1436	20.1272	21.4842	25.0064	21.9673	26.3459	23.0581	14.8555	15.481	16.0406	23.845	28.2151	26.9637
POLR3GL	53.0961	52.7924	48.9734	38.6553	36.4766	35.9553	36.3776	37.9733	38.3572	58.2977	42.1335	46.4085	42.8478	37.504	39.5065	39.8212	33.6721	37.6717
TXNIP	86.0852	70.4205	73.1991	233.793	193.145	183.139	399.517	248.948	271.097	204.725	78.191	64.5793	225.78	186.621	195.248	311.714	202.839	223.257
LINC01719	3.75257	5.76917	5.95199	4.04099	5.19307	4.17581	2.38977	3.00779	3.28473	4.35446	4.93052	5.9316	3.49903	3.29596	4.09344	1.96721	2.72849	2.77378
NBPF10	22.5154	15.5676	25.3221	33.6572	29.2188	34.8165	24.0039	24.9217	26.2249	21.7723	27.4416	21.2201	37.0775	38.303	31.1768	26.3487	26.7268	23.6093
NOTCH2NLA	4.48069	3.06773	5.16884	7.97564	5.1305	7.75508	5.46992	4.45797	5.93371	5.26434	4.98032	4.05187	10.006	7.49081	6.80654	4.59016	5.33296	4.96699
NBPF12	35.9015	31.9593	37.9048	33.0191	29.7194	30.5322	34.9969	29.1648	37.0857	38.8002	34.912	35.9238	32.7804	29.6636	29.4633	37.3771	30.8196	31.6081
PRKAB2	46.7672	55.7228	54.0901	45.9929	50.6793	51.7909	50.3976	52.0991	58.9133	51.2136	60.3117	60.3603	49.4775	58.3784	62.2108	67.839	64.8017	70.2475
FMO5	8.28927	7.4175	6.9962	14.8879	10.9492	12.5817	8.8156	8.80852	9.32441	12.4784	13.148	11.0695	19.8892	20.4749	25.3698	22.8316	27.905	28.3828
CHD1L	1.17618	0.961528	1.35747	0.691222	0.813372	0.596544	0.902802	0.429684	0.741714	1.16985	0.946261	1.16961	0.982184	0.599265	0.52358	1.07303	0.744135	0.838583
BCL9	74.7154	55.3565	71.4239	137.872	133.205	135.144	114.125	107.313	114.277	71.6211	75.2028	62.7831	136.401	132.038	119.852	119.463	116.767	117.208
ACP6	14.2262	13.965	12.0084	17.1742	16.6428	15.4017	11.8957	13.0516	13.5628	17.1579	14.2437	16.1657	14.9783	16.7295	14.803	14.0686	11.9682	13.0948
GPR89B	43.1826	53.1587	46.1541	45.089	47.551	45.4458	37.6522	37.1676	37.1917	46.1443	49.7036	52.5907	53.6518	51.7865	54.8807	46.0209	46.3224	45.348
NBPF11	28.6204	28.9832	28.5069	24.0864	23.7129	23.4822	27.031	20.7322	28.45	33.2109	26.7941	28.9897	28.6061	20.425	26.7026	30.3428	23.8743	22.0612
LINC01138	3.36051	3.47981	2.87158	4.67904	3.50376	4.55543	4.14227	4.56539	4.55624	6.69417	4.18347	5.34679	8.04163	6.69179	6.75894	7.51118	6.20112	5.74107
NBPF14	47.9993	36.538	53.6202	70.0261	54.8713	69.4703	44.2373	47.9634	49.324	46.9242	57.4231	44.9883	78.3292	74.6085	59.8785	51.2668	48.6788	48.8958
NUDT4B	13.274	15.5218	14.2013	14.2498	16.0172	16.3236	22.5701	21.6453	20.662	14.8831	13.2975	12.6986	10.5585	12.5346	12.2327	19.2548	19.8436	19.3519
PDE4DIP	115.77	124.495	141.96	122.027	132.329	134.819	119.542	135.511	146.595	117.765	146.372	135.926	131.92	159.255	146.602	135.201	169.725	167.007
NBPF9	58.809	61.5836	66.4639	45.9929	45.674	45.3374	42.6441	41.9479	50.5425	55.893	72.8123	66.7514	52.9766	54.2834	55.0235	55.38	56.3682	52.8952
NOTCH2NLC	20.1071	19.6884	21.5107	25.4157	23.7129	25.326	17.3126	16.1668	18.4369	24.9569	23.7063	21.9302	30.7546	26.5674	25.7506	17.5261	17.9833	20.384
NBPF19	24.5878	20.5584	27.0972	28.1806	23.2124	24.7837	20.021	20.7859	23.6819	25.2819	28.7364	24.1859	29.9566	29.4639	28.3685	21.2221	20.1536	20.1905
BOLA1	23.0195	29.5784	23.2859	14.5157	17.0808	15.8898	16.8346	17.0799	16.2118	30.6762	21.3656	26.7757	18.0476	14.5821	17.2781	18.8376	17.3631	19.4164
SF3B4	281.163	276.691	285.278	251.339	262.093	253.64	240.464	267.156	240.315	233.971	298.122	274.357	244.318	254.288	231.993	236.125	237.255	235.061
MTMR11	15.7384	15.8423	15.5587	10.0493	10.7615	10.5209	8.8156	9.34562	10.7549	12.3485	12.5504	15.3303	9.51491	8.43965	8.32968	5.18629	5.519	6.19261
OTUD7B	70.9069	57.7374	72.5726	97.7813	87.719	92.6813	107.221	98.2364	97.2175	65.2519	76.9957	58.4806	82.6262	87.243	77.4898	107.779	103.373	104.887
VPS45	74.8275	79.12	73.5124	79.2247	70.5756	69.1449	57.089	57.0405	62.6219	68.5015	70.4217	75.3982	76.3648	72.8607	81.5833	59.7914	62.0732	62.2487
PLEKHO1	27.2202	31.2725	30.5953	12.5483	14.7658	16.7032	16.9939	18.7987	17.9601	13.4533	23.3577	26.6922	9.02382	9.73806	9.18645	9.47839	9.73576	12.5787
ANP32E	146.294	168.176	171.877	56.4144	53.1194	56.5632	33.1382	31.0446	37.7215	141.227	148.015	160.822	54.3885	56.231	65.5427	33.5022	30.6956	37.5427
APH1A	344.957	335.894	328.717	334.658	321.97	325.767	374.822	363.405	343.361	348.682	341.6	335.929	342.107	334.59	318.86	387.362	369.587	387.941
C1orf54	0.78412	0.686805	0.365473	1.32927	0.938506	0.921932	0.902802	0.805657	1.11257	0.844895	0.796851	1.12784	1.28912	1.09865	1.47554	1.54993	1.6743	1.67717
CIART	22.4034	23.855	20.3621	15.6854	16.0172	19.2521	20.4458	24.0623	28.556	26.7117	18.9252	25.6897	17.1882	15.6308	21.324	24.5007	24.8045	31.4791
MRPS21	120.306	151.235	119.458	120.007	132.392	124.352	120.657	122.89	118.144	122.25	110.314	129.451	125.781	120.702	132.085	135.201	118.193	128.303
PRPF3	88.3255	93.5887	93.9267	53.49	57.6868	55.3159	43.2283	52.0454	52.1319	99.2426	92.0363	91.355	56.9667	54.4332	58.9741	43.5171	47.8727	46.3156
RPRD2	190.205	127.883	171.564	177.112	150.349	172.998	220.815	199.803	197.402	173.788	178.993	147.956	172.619	178.531	159.644	203.219	195.025	189.649
TARS2	81.9405	80.9973	87.3481	57.3714	55.8724	61.9321	46.0429	45.5465	49.1121	81.7598	76.0993	90.7702	61.8776	57.1799	65.8759	51.386	55.5621	59.5394
ECM1	3.69657	2.28935	3.55031	8.45418	4.9428	7.1043	8.8156	8.05657	10.437	4.22447	4.53209	3.29998	6.8139	6.59192	6.14016	15.082	11.9682	12.9658
ADAMTSL4	0.39206	0.45787	1.20084	0.903906	0.813372	0.759238	0.955908	1.66502	1.48343	0.779903	0.747048	0.877209	0.245546	0.898898	0.618776	1.19225	0.930168	1.35463
MCL1	413.679	409.565	433.817	632.734	723.588	725.723	741.094	772.732	787.595	452.539	453.956	384.217	571.386	607.555	554.043	612.936	640.638	578.106
ENSA	429.642	479.207	431.885	466.681	510.61	490.576	518.686	513.15	519.624	421.538	401.862	406.231	436.028	438.712	474.173	464.68	491.129	503.343
GOLPH3L	62.7856	77.2427	66.5684	77.47	92.349	85.4143	96.7592	90.717	86.7806	78.8352	69.7743	73.3096	92.5709	95.2332	103.383	100.328	107.279	110.177
CTSK	2.35236	2.60986	2.5061	3.77514	2.75295	2.44041	3.29257	2.90036	3.23175	2.85964	2.68937	2.25568	3.06933	3.49571	3.28427	4.23249	2.91453	2.77378
ARNT	104.68	104.349	109.955	107.086	114.498	118.55	131.437	144.105	142.674	102.232	106.778	113.912	119.09	117.556	130.371	139.016	139.711	145.72
SETDB1	116.162	109.752	122.225	109.798	99.4816	106.781	124.958	115.316	123.389	121.015	121.121	119.342	115.529	114.51	103.478	129.419	128.239	115.66
CERS2	498.532	475.04	461.28	947.612	970.79	946.607	1089.26	1098.06	1045.5	539.238	495.044	466.926	992.252	936.452	949.298	1175.5	1120.98	1133.76
ANXA9	58.921	61.263	55.4475	294.78	337.111	297.296	134.358	142.333	143.575	71.5561	73.6589	67.1691	323.814	335.339	340.517	124.113	136.425	148.881
MINDY1	36.0695	27.518	31.7962	78.5335	69.8874	73.6461	59.5849	50.0581	55.7345	40.035	30.878	28.9061	96.4996	77.6048	89.6274	54.0089	46.9425	55.024
PRUNE1	91.9101	101.464	84.8942	89.8589	91.7859	90.0782	85.9255	84.2717	88.1051	89.6888	92.3351	95.6993	106.813	99.478	104.716	88.2265	82.1029	95.921
BNIPL	12.994	7.96694	9.81557	28.1806	25.5899	24.6752	17.5781	19.658	23.0991	16.118	10.7077	10.9442	32.1665	26.9669	31.9384	17.5261	24.6185	25.222
C1orf56	14.8983	13.1867	13.2615	15.9513	16.5177	14.6967	16.5691	16.9725	13.8807	17.7428	13.7457	14.7037	16.5744	17.7283	15.6598	21.2221	18.7894	18.6423
CDC42SE1	298.806	323.943	315.821	287.974	291.875	310.962	269.725	287.727	334.778	291.034	338.462	334.008	309.756	313.815	351.417	298.778	342.178	365.558
MLLT11	11.6498	10.0731	12.2695	7.76296	6.50697	7.37546	4.30159	4.24313	4.50326	7.60405	11.8034	11.5708	8.59411	8.28983	10.2336	4.35171	4.71285	4.96699
GABPB2	26.9401	28.6627	33.3625	26.745	26.8413	27.2241	24.5881	25.5662	26.7547	35.5506	33.1191	29.2821	27.2556	25.5187	28.3209	30.5812	25.4866	24.7705
SEMA6C	5.37682	2.06042	2.34947	4.04099	3.69146	3.85042	9.08113	8.64738	7.41714	4.93939	2.53996	2.25568	5.21785	1.7978	2.23711	6.25931	4.34079	4.0639
SCNM1	46.3191	56.3638	45.6842	42.2709	36.2263	38.0161	34.0941	35.2878	37.0857	46.7942	48.2095	52.2148	38.7349	35.3566	39.7445	35.4695	34.7263	40.8971
LYSMD1	7.78519	8.74532	8.66694	5.21075	4.25456	4.71812	2.81462	2.41697	3.76155	8.90389	7.47048	8.06196	4.29706	3.14614	5.42619	3.99404	2.85252	4.57995
VPS72	112.073	133.378	121.494	105.438	125.76	113.343	119.117	128.959	121.376	116.336	125.554	125.023	103.866	113.311	110.428	113.979	119.124	120.82
PIP5K1A	201.743	219.595	207.328	189.661	191.893	194.962	158.468	163.763	176.422	196.925	204.243	207.731	182.87	185.073	193.296	156.066	162.965	164.04
PSMD4	298.414	359.016	340.099	260.431	292.751	289.107	269.779	273.279	273.957	283.17	315.155	345.411	270.53	271.167	285.208	274.277	263.61	290.537
ZNF687-AS1	3.97661	4.44134	3.81136	2.44586	3.94172	3.14542	2.28356	1.87987	2.54302	4.54943	3.38662	3.34175	2.70101	2.59682	2.76069	3.09985	2.48045	2.32223
ZNF687	167.074	127.7	163.836	188.757	171.997	187.152	201.484	193.143	196.077	154.941	168.086	145.742	180.476	179.38	162.595	188.018	196.638	196.615
PI4KB	163.993	166.161	176.419	211.408	202.968	208.519	195.589	194.808	196.713	152.081	177.797	176.402	195.393	201.653	199.532	193.323	209.412	224.289
RFX5	120.25	88.9642	92.778	130.694	124.008	123.919	163.991	156.405	155.23	131.934	100.503	99.8347	124.001	109.616	124.517	170.253	162.159	169.587
SELENBP1	167.466	139.788	130.683	276.383	247.39	240.19	256.661	238.582	241.534	228.252	201.554	174.147	383.175	361.956	349.275	441.073	452	453.867
PSMB4	333.755	419.821	352.891	316.473	359.448	328.859	314.653	321.457	319.944	330.939	355.545	381.252	318.719	319.358	318.241	321.788	319.11	331.176
POGZ	158.112	123.808	167.126	138.882	128.575	143.93	171.001	175.848	175.627	155.071	168.484	142.358	143.951	147.569	126.802	157.675	172.267	155.976
CGN	168.53	118.909	162.427	267.45	245.388	270.397	242.854	249.593	274.487	160.79	180.288	140.52	237.136	265.874	226.472	223.01	255.734	237.126
TUFT1	61.3294	44.8255	45.3709	109.426	123.633	115.296	132.075	135.619	135.628	69.4764	45.3209	40.5187	81.3371	86.2442	80.8217	78.6885	90.9084	76.1175
SNX27	76.3957	68.9553	83.5368	86.2964	88.2821	93.549	88.9526	95.8732	91.6547	61.5473	88.8489	71.7222	86.4322	88.5914	77.2994	76.2444	89.9783	78.2463
RIIAD1	0.112017	0.137361	0.104421	0.425367	0.375402	0.379619	2.07113	1.5576	1.32449	0.389951	0.498032	0.292403	1.3505	0.299633	0.904365	2.08644	1.36425	2.70927
MRPL9	131.004	157.965	143.892	90.3374	100.17	103.636	109.027	107.636	117.827	144.867	142.885	156.436	93.4303	103.173	109.666	117.794	115.589	124.433
OAZ3	3.58455	4.25819	3.86358	5.79563	4.44226	4.44697	3.98295	3.97457	3.97347	4.48444	4.28307	4.92908	5.4634	7.49081	7.8537	4.88823	6.20112	7.35373
TDRKH	64.4099	70.4205	65.8896	62.21	59.7515	64.6979	60.3815	60.102	60.1848	72.466	73.3103	75.0222	69.244	74.1591	78.775	72.31	77.0179	78.0527
TDRKH-AS1	7.67317	8.60796	6.05642	8.7732	8.63425	7.70084	10.4619	9.93643	10.0131	12.2835	6.82304	8.56323	8.40995	9.03892	10.2812	10.0745	11.162	12.1917
RORC	8.12124	5.86074	5.27326	7.17808	4.06686	4.60966	10.4088	6.76752	6.67543	20.3425	11.5045	11.4455	12.7684	12.1851	11.9947	20.3279	18.1693	19.0939
C2CD4D	1.2882	1.19046	1.93179	1.86098	1.93958	1.8981	1.54007	2.14842	1.69535	1.94976	2.04193	2.17214	2.51685	1.99755	2.6179	2.62295	2.48045	3.28983
C2CD4D-AS1	1.84828	1.00731	1.20084	1.16976	1.50161	1.08463	1.22144	1.28905	1.43045	2.66467	2.49016	2.00505	1.90298	2.19731	2.5703	1.84799	2.54246	2.0642
THEM4	36.5176	28.2048	24.1735	42.6431	35.8509	36.4434	43.8125	36.362	41.2711	37.7603	28.1388	31.4124	41.4359	34.5077	37.2694	49.538	45.9503	49.9925
S100A10	269.289	291.068	287.419	426.909	518.18	469.48	438.178	481.837	492.922	267.182	264.156	270.473	379.983	417.188	384.784	339.672	404.499	389.232
S100A11	483.186	460.572	456.685	636.935	710.386	654.789	555.064	601.987	612.232	526.434	469.843	454.269	656.406	637.818	598.499	520	553.884	584.686
TCHH	1.62425	2.38093	2.55831	4.89173	2.69038	4.06735	4.35469	4.13571	4.39731	1.75478	2.44036	2.04682	4.41983	3.84528	4.04584	3.63636	2.91453	4.45094
S100A9	0.39206	0.732592	0.678736	0.957077	1.06364	1.62694	1.22144	0.751946	1.58939	1.03987	0.747048	1.79619	1.10496	2.49694	2.5227	2.02683	3.16257	3.93489
S100A8	0.168026	0.274722	0.261052	0.159513	0.312835	0.488082	0.318636	0.322263	1.00661	0.259968	0.398426	1.0443	0.368319	1.09865	0.951963	1.25186	1.36425	1.0321
S100A4	1.06416	1.83148	0.626526	1.01025	1.18877	1.24732	0.690378	0.751946	0.794694	1.42982	0.946261	1.21138	0.675252	0.699143	0.856767	0.298063	0.310056	0.580558
S100A16	276.402	293.586	297.495	394.103	467.438	501.26	438.284	449.986	523.915	317.615	333.283	350.048	405.274	491.497	494.64	465.872	545.885	608.36
S100A14	376.938	373.439	369.911	532.294	658.143	610.916	560.8	563.96	600.683	459.233	349.668	369.514	485.751	551.873	558.803	464.978	537.389	534.629
S100A13	194.35	231.911	172.034	221.563	252.771	221.372	231.17	220.804	227.759	221.947	173.963	189.477	236.154	231.566	239.8	239.225	229.814	236.222
S100A1	0.952146	1.4194	1.61852	1.38244	0.625671	0.976163	1.8056	1.12792	1.32449	1.81977	1.4941	1.79619	1.16634	1.64798	1.04716	1.9076	1.48827	1.35463
CHTOP	132.516	138.414	137.47	123.888	140.526	132.433	115.399	127.831	124.343	148.312	137.258	140.186	128.85	136.283	134.56	116.781	133.758	125.013
SNAPIN	61.2734	75.9149	54.56	52.9051	54.8713	54.3398	62.2934	63.7006	58.4365	70.9712	57.5227	63.4932	59.5449	52.0362	58.165	63.9046	60.0269	62.6357
ILF2	362.712	448.576	380.51	204.655	222.488	209.658	198.139	208.289	193.481	341.013	371.93	398.42	212.581	220.38	243.798	203.458	205.939	218.806
DENND4B	95.3266	80.3105	113.297	73.9076	66.3211	82.8654	82.4205	89.8576	91.0189	78.3153	106.38	104.889	69.4895	69.6146	64.3051	74.3368	79.4364	77.5367
CRTC2	72.027	66.6201	74.0345	69.2286	70.5756	68.4941	86.4566	88.8371	85.9859	52.1885	71.9656	73.1425	63.535	65.1201	60.1641	75.0522	73.4833	76.1821
SLC39A1	295.837	307.139	293.423	248.999	258.84	257.056	253.687	257.756	277.295	272.836	303.152	305.728	247.572	252.291	266.026	268.674	275.702	300.922
CREB3L4	135.653	124.449	112.566	95.0165	79.8356	95.2844	118.32	104.628	120.846	190.881	132.227	137.137	129.28	117.056	137.416	194.277	175.988	214.871
JTB	188.637	240.702	186.914	194.074	213.729	192.467	179.764	182.723	174.356	214.668	203.795	222.143	220.562	196.859	203.006	215.201	190.498	218.483
RAB13	143.326	164.055	153.186	147.868	154.603	146.045	132.022	133.685	133.932	151.171	152.497	147.455	151.318	145.122	156.17	152.668	138.967	146.107
RPS27	262.232	288.596	256.301	267.237	315.025	268.77	291.18	295.622	279.891	318.59	247.522	247.415	312.826	256.935	272.024	323.04	301.871	325.499
NUP210L	19.883	20.7415	20.4143	21.5342	23.6503	21.2587	26.3937	25.2439	24.4766	20.7974	22.4114	19.6745	26.1507	19.8756	22.7995	26.0507	23.5643	23.4803
TPM3	626.12	733.279	661.298	434.194	488.398	475.608	450.233	476.841	468.763	598.316	682.702	668.851	429.89	479.362	509.205	428.435	452.248	463.156
C1orf43	388.644	501.688	375.602	344.973	387.665	353.154	362.077	370.065	349.983	433.366	387.917	420.935	376.729	364.303	415.722	381.52	352.596	392.65
UBAP2L	276.01	257.964	315.142	279.573	300.885	302.068	277.585	301.692	300.394	205.569	324.119	265.293	267.645	301.281	254.46	242.086	283.391	244.544
HAX1	145.902	183.606	142.9	108.256	118.439	112.476	102.601	97.6456	102.674	210.249	145.276	171.265	119.581	116.707	130.99	120.358	111.248	120.175
ATP8B2	41.5024	32.7835	45.3709	88.2106	87.4687	95.3928	130.588	120.634	121.217	47.5741	44.524	39.9756	71.8836	81.8996	75.9667	116.006	126.751	116.886
IL6R	13.274	12.3167	13.2615	13.8776	13.4519	12.9613	8.97492	8.64738	8.42375	11.3086	12.6002	10.4847	10.804	11.5359	8.47247	7.6304	7.31732	6.51515
UBE2Q1	128.708	126.006	132.771	144.146	147.721	151.414	140.89	146.039	143.893	120.625	137.706	132.542	150.274	144.023	143.08	154.873	144.672	137.915
ADAR	471.088	371.882	480.128	451.9	416.634	463.081	436.585	432.799	457.903	427.192	454.404	434.636	442.842	448.75	434.667	459.791	461.922	464.64
PMVK	40.6062	39.2395	37.696	33.285	34.4119	31.8338	35.9528	34.697	34.4367	47.7691	37.4022	40.3098	36.1567	34.9072	40.6012	41.3115	47.1285	48.5088
PBXIP1	63.1777	35.1644	43.9612	167.382	141.089	123.973	213.168	189.705	174.727	76.4305	47.4624	40.3098	168.138	134.585	118.424	175.022	174.003	155.589
PYGO2	123.667	112.545	124.104	101.503	103.799	105.859	132.606	142.601	130.224	126.929	122.864	116.585	103.498	104.072	101.003	139.255	142.006	131.464
SHC1	122.323	102.7	121.181	141.169	135.333	131.023	140.572	139.593	139.442	132.973	126.251	117.755	137.997	142.975	137.035	156.423	151.989	146.301
CKS1B	111.849	152.242	117.735	24.1396	27.6546	29.2849	10.1432	9.72159	12.6091	126.019	113.551	131.414	25.7823	30.4127	32.224	12.5186	15.6888	15.6105
FLAD1	63.9618	72.3435	65.9418	63.1671	59.1884	61.4441	51.9377	60.3706	54.0922	49.7188	62.4532	62.616	57.6419	54.1336	61.0209	53.6513	55.6241	56.3786
ZBTB7B	132.348	95.6949	126.976	171.689	160.234	184.929	182.95	191.209	186.647	127.839	138.154	122.183	178.451	192.015	161.453	177.824	214.807	190.939
DCST2	0.840129	0.869954	1.09642	1.01025	0.375402	0.488082	1.16833	0.751946	0.688735	1.16985	0.647441	0.960752	1.28912	0.549326	1.18995	1.07303	1.17821	0.90309
DCST1-AS1	2.35236	2.33514	1.67074	0.744393	1.06364	0.542313	0.902802	0.859367	0.635755	2.33971	1.74311	2.21391	1.53466	1.24847	1.52314	1.49031	1.48827	1.48365
ADAM15	300.262	283.239	301.359	312.007	304.013	304.292	217.841	226.551	224.951	273.876	311.917	311.451	306.687	308.721	270.5	215.857	230.868	239.254
EFNA4	27.1082	29.5784	25.061	23.7142	22.8995	21.9637	27.2434	31.6355	24.0527	21.6423	27.3918	28.739	20.8714	18.3775	19.0869	25.5738	24.2464	22.7063
EFNA3	70.7388	66.3454	65.0543	80.0223	81.9003	83.3535	71.5338	85.883	84.2375	72.596	76.1989	72.2235	92.6322	86.8934	79.4413	79.4635	87.1258	89.8574
EFNA1	60.3772	64.1018	48.9212	69.6539	77.3954	70.9888	133.031	123.856	125.509	72.336	51.6459	54.9717	65.0083	66.3686	55.7851	121.908	106.101	107.597
SLC50A1	164.105	181.179	166.551	174.188	174.75	175.167	157.831	153.236	170.17	206.999	171.323	193.905	210.494	201.603	218.19	218.599	210.962	248.221
DPM3	30.1326	37.1333	29.3945	30.3606	29.7819	33.298	26.0751	26.1033	24.9004	37.0454	30.8282	37.6364	32.5349	31.6612	35.9842	31.1177	33.424	35.8656
KRTCAP2	65.418	76.0065	63.2269	62.6354	64.1938	58.5698	57.6731	55.1069	51.4432	69.4764	68.7284	76.6095	63.0439	59.8766	66.7326	59.3741	52.2755	61.5391
TRIM46	1.56824	1.37361	1.09642	2.60538	2.00215	2.33195	0.79659	1.23534	1.58939	2.66467	1.29488	1.25316	2.02575	1.84773	1.61834	0.774963	0.930168	1.16112
MUC1	39.262	26.1902	39.68	50.087	44.2349	49.1878	33.2444	39.7995	48.2644	40.6199	56.1282	40.5187	57.0895	68.6658	48.0742	29.8063	55.8721	52.2502
THBS3	15.6264	12.3625	15.7676	23.5547	19.7086	20.4452	26.4999	24.1697	27.1785	20.2125	12.899	13.91	21.6694	16.1302	17.5637	22.8912	16.1229	17.7393
MTX1	54.3283	59.981	50.7486	43.1216	42.0451	42.7885	40.5199	37.9733	41.1651	55.8281	52.3432	58.4806	45.3032	44.5953	48.3597	40.8942	40.1213	42.9613
FDPS	205.495	239.283	224.401	118.943	123.57	130.589	84.9696	84.8625	91.1249	167.614	196.972	218.926	111.355	114.11	129.134	90.0745	87.1258	93.7923
RUSC1-AS1	0.78412	1.09889	1.04421	1.06342	0.688238	0.596544	0.849696	0.698236	0.953633	1.55981	0.896457	1.58733	1.22773	0.549326	1.33275	1.66915	0.868157	1.16112
RUSC1	150.831	149.54	165.559	94.6974	90.5345	115.404	95.0598	109.838	116.873	121.21	166.193	161.782	100.674	111.963	112.474	125.306	130.844	152.687
ASH1L	132.572	83.4698	129.743	156.801	116.062	153.963	160.964	155.223	169.217	128.229	131.829	104.471	164.761	152.663	133.513	156.602	170.469	140.946
ASH1L-AS1	4.42468	5.03657	2.87158	4.2005	3.12835	2.92849	3.77053	2.5781	3.1258	5.78428	3.1874	4.46959	3.80596	4.04504	3.80785	3.99404	4.03073	3.28983
MSTO1	45.1989	41.9867	48.869	35.784	35.6632	34.6538	26.7123	26.8552	28.2911	37.8253	43.0798	48.0794	33.7626	34.7074	36.5078	27.6602	28.0911	31.6726
YY1AP1	111.009	97.389	103.69	114.69	106.865	108.191	104.46	103.93	106.171	110.356	114.199	103.218	113.504	115.958	119.424	111.416	108.21	115.789
DAP3	229.411	247.204	221.477	212.205	224.929	215.569	214.655	213.231	210.382	244.045	227.601	238.35	223.508	217.983	233.421	241.908	224.605	244.221
GON4L	80.5403	62.774	77.7936	84.9671	83.6522	88.9936	90.2271	92.7043	99.8135	67.7866	82.4243	69.1742	88.3352	85.5451	78.0134	89.1803	88.304	83.7293
RIT1	36.7416	47.8017	37.2261	56.5739	64.2564	59.7087	52.8405	57.9536	58.9133	34.8357	40.1912	44.3199	53.4677	60.7255	66.6374	48.2861	54.0738	52.4437
KHDC4	19.323	35.3934	33.728	12.7079	24.2135	22.2891	15.7725	28.9499	25.4832	27.1666	37.2528	34.8795	18.4773	22.1229	24.7986	15.082	24.6805	22.1257
ARHGEF2	36.6296	33.0124	39.5755	28.6591	26.8413	28.2545	30.1111	35.3952	31.258	40.36	41.4363	38.5136	27.1328	29.5637	23.4659	25.2757	31.1916	29.9955
SSR2	271.25	321.517	269.197	277.127	316.84	281.298	323.044	333.112	310.142	305.722	279.296	296.371	301.285	297.785	307.484	350.164	321.094	347.883
UBQLN4	139.013	143.313	175.532	142.232	152.789	167.466	130.11	151.947	158.727	85.6593	148.961	141.189	113.995	130.29	129.039	105.335	119.806	122.369
LAMTOR2	46.7112	58.1037	49.6522	58.2753	70.2628	59.1663	51.8846	50.7564	50.9664	50.8887	44.8727	53.5933	65.1925	54.7828	62.8772	54.307	47.1285	56.5721
RAB25	135.765	128.295	112.67	163.979	170.245	159.548	157.672	153.612	149.932	150.066	124.508	123.812	171.514	162.551	158.312	161.073	147.277	160.943
MEX3A	40.3262	34.9355	42.1339	37.3792	38.8541	44.09	40.8916	47.8023	37.9334	26.7117	34.414	31.1618	25.2299	22.822	23.2279	15.7973	16.557	16.3201
LMNA	359.799	322.753	396.33	369.91	371.586	396.648	339.772	363.727	386.645	315.081	366.053	364.25	325.717	337.037	303.962	241.908	314.335	303.567
SEMA4A	31.8689	22.2067	22.2417	46.0992	37.7279	39.3177	39.4047	35.8786	35.8672	44.9744	31.8242	29.115	51.5647	49.4394	46.4082	50.4322	47.6866	49.928
SLC25A44	61.1614	59.4774	60.8252	77.2574	71.7018	70.9345	89.3774	92.7043	84.8203	45.2994	66.1884	59.1907	66.7271	68.1165	68.2082	79.4635	85.0174	82.6327
PMF1	87.3174	95.466	80.0387	63.0076	66.1334	59.0036	70.4186	74.013	62.5689	101.257	81.478	91.8145	68.9984	66.3686	66.8754	76.1252	72.9872	77.5367
BGLAP	1.06416	1.19046	0.574315	0.478538	0.250268	0.271156	0.424848	0.698236	0.635755	0.779903	0.547835	0.960752	0.368319	0.79902	0.713973	0.71535	0.372067	0.516051
PAQR6	7.67317	5.95231	7.30947	10.4747	7.57061	7.21276	4.99197	4.88765	4.82114	10.5287	6.02619	8.06196	11.8476	5.24357	6.37816	7.1535	3.78268	4.70897
SMG5	165.897	155.767	180.962	217.735	204.594	203.747	209.716	213.445	200.21	158.58	179.242	156.227	192.201	183.125	169.259	184.083	174.996	172.49
TMEM79	18.7069	16.2544	16.4985	31.3177	28.0926	31.2372	17.2595	18.9061	18.5958	21.7723	20.2201	18.7973	29.8952	31.7111	26.5598	15.2608	19.2235	19.3519
GLMP	28.2283	28.6169	26.5229	46.7372	47.8638	46.7474	52.8405	53.6567	52.4498	32.301	28.6866	28.6137	51.6261	55.6817	49.4069	53.532	54.9419	53.5403
CCT3	559.302	694.086	600.055	546.863	643.565	589.928	429.999	458.526	447.413	509.277	578.115	601.18	542.288	549.426	579.27	407.511	417.646	436.579
TSACC	0.896137	0.915741	0.939789	0.372197	0.813372	0.542313	0.371742	1.07421	0.264898	0.714911	0.846654	0.626578	1.28912	0.649204	1.18995	0.596125	0.434079	0.967596
RHBG	4.98476	5.17393	5.53431	3.45611	2.50268	2.27771	6.2134	3.75973	4.76816	4.93939	4.83091	4.84553	2.70101	2.19731	1.90393	5.66319	4.46481	4.38644
MEF2D	66.8742	45.6955	62.2871	89.3272	85.1538	92.844	123.259	125.038	124.078	80.655	61.9054	61.154	78.9431	81.1005	72.3016	114.575	122.472	115.983
IQGAP3	85.133	71.2446	97.738	5.58295	5.3182	8.40585	1.00901	0.537105	2.54302	73.3759	75.0534	64.3286	4.66538	6.89155	5.85458	0.834575	3.16257	3.28983
NAXE	121.483	160.255	127.446	112.829	114.31	117.357	91.5017	94.7453	92.6083	115.556	127.297	147.371	110.005	118.804	123.232	96.3338	97.2956	110.693
GPATCH4	67.3223	70.6952	78.5246	60.6149	67.0093	63.776	36.9618	40.068	42.4896	58.4277	76.4977	69.4666	58.44	64.0215	71.7304	41.1326	43.4079	45.219
NES	9.63348	5.17393	12.0084	3.13708	1.31391	2.71156	2.23045	2.20213	1.69535	2.59968	6.52422	4.0101	1.3505	1.7978	1.04716	0.536513	0.806146	0.516051
CRABP2	3.36051	2.70143	2.76716	1.80781	1.56418	1.95233	5.2575	3.75973	4.02645	3.70454	2.73918	3.80124	1.65744	1.59804	1.76113	5.96125	3.53464	5.80558
ISG20L2	165.897	157.004	163.941	133.034	136.459	145.177	128.623	140.399	138.912	119	158.324	152.133	124.676	133.187	128.372	125.663	136.363	136.754
MRPL24	95.7187	116.391	97.7902	71.6744	85.7169	76.9542	68.613	69.931	67.549	106.327	91.7375	103.009	75.0757	76.2565	83.9156	71.0581	68.3364	71.8601
HDGF	889.08	848.067	936.604	638.583	690.553	668.943	632.44	643.398	626.59	826.437	893.22	830.09	645.479	651.301	654.427	607.928	605.043	591.266
PRCC	137.557	126.326	132.562	143.296	136.897	140.134	146.519	160.379	147.23	121.99	139.997	135.466	135.787	132.737	131.228	138.301	142.626	147.978
ARHGEF11	78.076	57.8748	75.3397	85.3925	75.0179	83.5162	88.6339	88.0852	86.9925	74.2858	75.6012	65.7489	88.3966	84.9958	76.8234	81.5499	89.4202	81.02
ETV3	43.3506	35.4849	36.3385	48.7577	44.0472	45.1747	57.0359	57.4702	58.4365	42.6997	42.8307	40.9364	49.5389	52.2359	44.5995	58.9568	66.7241	56.0561
DUSP23	28.2283	36.0802	26.5751	26.1601	25.9653	25.2176	24.3226	25.405	22.1984	26.7117	29.9317	33.2504	31.9824	26.8171	23.8943	26.8852	27.2229	28.5118
CFAP45	3.08047	2.28935	2.76716	2.65855	3.00322	3.03695	4.35469	4.08199	4.9271	5.19935	3.38662	3.38352	3.00794	4.14492	3.56986	3.8152	4.65084	5.48304
TAGLN2	487.835	545.69	476.525	423.241	494.905	478.971	482.256	535.493	530.273	413.089	444.095	447.961	320.745	366.8	332.806	265.991	312.909	314.017
IGSF9	35.1734	32.6462	37.2783	23.5016	26.3407	31.0745	41.2103	53.0659	50.4366	33.4708	42.8805	34.7959	26.1507	29.5138	23.0375	29.687	39.5632	37.0912
PIGM	45.871	38.0948	39.4711	45.9929	45.1108	42.3546	44.8746	43.3981	46.9929	47.0541	46.4664	41.0617	47.5132	50.0886	50.4065	49.0611	49.547	54.9595
IGSF8	37.1897	39.0563	44.0656	36.6879	37.1648	42.5716	37.3335	41.1422	35.1784	34.4457	42.0339	45.1971	37.323	35.9559	33.6519	36.1848	35.9665	33.8014
PEA15	114.145	117.902	110.843	129.897	145.656	131.023	151.565	161.722	136.793	92.0285	118.581	107.354	115.652	136.033	123.422	132.638	147.277	127.723
DCAF8	93.5343	86.0338	89.3843	119.262	121.005	116.814	133.402	129.979	132.555	104.117	91.0402	88.0133	120.809	118.954	122.565	131.565	135.433	130.883
PEX19	88.3815	92.2609	79.9342	100.599	93.6003	92.6813	107.168	94.3693	98.0652	104.377	83.9184	90.3107	109.636	105.071	113.284	113.204	105.605	108.693
COPA	288.052	263.871	286.531	359.382	359.761	376.962	351.774	344.66	358.513	276.151	302.455	294.993	375.01	408	394.398	371.148	398.112	392.973
NCSTN	97.2309	81.913	93.2479	177.91	162.674	167.846	190.969	186.053	180.819	112.436	104.288	95.4904	172.066	188.169	176.399	199.344	220.822	200.228
F11R	285.308	281.911	275.41	406.598	429.273	416.279	409.554	408.414	430.883	302.927	304.048	288.936	442.106	453.394	437.284	426.23	456.651	448.965
TSTD1	81.9966	95.4202	73.8256	92.4111	96.9789	88.7224	92.192	96.6788	90.9659	101.387	78.3404	82.9589	108.409	93.6352	91.9121	110.82	106.907	117.595
USF1	31.9249	38.2322	34.3545	30.8923	34.0365	32.1049	30.7484	33.0319	33.801	27.7515	35.5595	33.6681	27.8081	28.6648	29.6537	30.9985	29.3933	32.2532
NECTIN4	33.1571	27.0601	28.2459	49.2895	48.2392	47.1812	49.601	47.3189	53.2445	37.1754	27.7902	28.5302	39.9012	43.197	37.317	31.3562	34.9123	32.5112
KLHDC9	5.37682	6.13546	5.11663	4.41319	5.19307	5.85698	8.07211	6.76752	6.14563	8.059	5.47835	5.80629	5.95449	4.44455	4.66462	8.40537	6.94526	8.57935
PFDN2	39.9901	56.1807	47.616	27.7552	33.0354	32.3761	23.8446	27.0164	23.8938	37.6953	41.0378	48.2882	30.0794	28.1155	33.3663	24.0835	20.4017	27.4152
NIT1	29.2925	34.9355	29.6033	26.9045	25.8402	23.7533	26.6061	25.1902	26.013	36.7204	34.7626	37.344	31.4299	29.5138	33.0331	32.7273	29.1453	33.2853
DEDD	60.3772	58.699	58.2669	56.8397	59.689	58.7867	58.4166	60.478	62.9927	65.7068	60.7101	62.24	55.8617	59.5769	61.5444	58.1222	59.9028	61.3456
UFC1	80.8204	103.25	84.0067	100.387	116.875	101.467	100.583	100.922	99.7076	96.513	82.8725	90.5196	112.767	109.865	120.519	112.608	104.303	114.112
USP21	26.268	24.6334	29.1857	17.7059	21.2102	23.1568	23.048	24.0086	23.5229	24.6969	28.6866	28.2378	20.6259	21.3239	18.6109	24.918	24.8045	24.706
PPOX	11.7618	11.7673	11.3819	12.761	12.4508	11.1716	12.7985	11.2255	15.576	14.3632	10.4587	12.7822	13.8734	12.5846	12.6135	15.38	12.8983	14.3849
B4GALT3	62.2255	65.6128	68.5001	52.1075	52.3061	57.4852	55.602	59.1889	58.9663	58.1028	67.9814	69.8007	51.7488	55.2822	55.6899	54.0686	58.8486	68.3123
NDUFS2	134.813	135.942	135.643	134.31	137.522	130.86	118.267	124.286	130.807	156.371	134.22	143.194	129.526	135.284	142.461	122.146	124.208	141.14
TOMM40L	11.5378	13.324	13.2615	13.7181	14.0776	15.6728	10.4088	10.0976	12.2913	9.29384	14.1441	12.3227	14.3644	14.5821	13.8511	11.8033	12.1542	12.5787
PCP4L1	1.51223	1.46518	1.25305	2.12684	2.12728	2.11502	1.91182	2.52439	2.22514	2.46969	3.1874	2.79871	3.06933	2.54688	2.85589	2.8614	3.78268	4.25742
SDHC	158.448	191.069	155.9	179.718	194.083	193.172	177.905	170.477	187.601	162.545	163.803	168.716	192.385	203.351	222.855	187.541	197.196	206.291
FCRLB	2.12833	1.73991	1.77516	12.7079	7.63318	8.8397	2.17735	2.041	2.17216	2.92464	1.5937	2.42277	12.5228	9.08885	8.42488	2.50373	2.35643	2.90279
DUSP12	19.0989	23.9924	18.5347	13.3459	14.0776	13.6663	14.1262	13.7499	13.9866	21.3173	17.8295	21.429	14.8555	13.1339	17.2305	14.6051	13.3324	13.0303
ATF6	72.9792	71.0615	71.0585	84.6481	78.2088	83.7331	77.5879	73.6908	77.2442	92.2885	71.9656	74.2286	93.3689	91.0883	99.4802	89.1803	86.3816	90.7605
NOS1AP	9.1294	8.1043	13.2093	4.99807	6.56954	6.77891	5.46992	5.20991	7.62906	6.75916	9.61202	8.73031	4.84953	6.29228	4.28384	3.57675	6.26313	5.54755
C1orf226	19.771	16.7123	30.6476	11.4318	11.2621	16.0525	12.7454	13.8573	14.0926	16.183	21.8636	20.0087	9.69907	14.5322	11.614	9.29955	14.1386	10.8371
UHMK1	205.944	217.397	217.927	219.49	225.93	239.214	252.785	252.063	265.11	205.959	212.112	206.019	225.473	226.123	233.755	233.502	246.991	243.512
UAP1	93.3663	107.966	88.3401	65.8788	60.69	63.8302	66.4356	66.5473	69.2973	111.656	100.802	103.218	77.4084	71.9618	89.6274	96.6319	86.6917	97.7272
HSD17B7	17.6987	25.5034	19.5789	12.3357	13.9525	12.419	9.24045	9.29191	10.6489	13.5833	19.6723	22.515	12.2159	13.9829	14.8506	10.9091	12.3402	11.4821
NUF2	48.6154	65.8875	52.2105	3.82831	4.06686	3.4708	0.584166	0.375973	1.11257	54.7882	40.7888	52.7996	3.74458	3.69547	4.99781	0.774963	1.42626	2.12871
PBX1	302.502	211.948	251.863	320.355	272.48	323.652	446.675	364.748	414.83	306.567	245.081	226.32	275.564	284.701	291.348	433.085	400.034	399.424
MGST3	49.5116	57.2338	50.6964	39.2401	43.7344	47.9947	58.9477	58.6518	58.9133	53.6183	44.6237	51.0452	38.5507	39.6514	43.2667	50.4918	53.7017	58.6363
ALDH9A1	134.141	151.876	125.253	117.401	119.315	110.686	122.197	114.672	118.039	155.136	134.967	144.489	131.613	130.79	144.841	148.197	143.06	151.526
TMCO1	110.281	124.907	102.124	136.277	145.03	136.229	133.084	126.434	127.946	125.434	108.073	107.395	148.801	149.966	158.74	150.82	140.951	145.01
UCK2	115.49	107.187	104.108	75.5559	67.8227	68.1145	53.2122	54.2476	52.1849	101.322	106.081	102.8	68.2618	66.5684	64.4955	52.7571	48.2447	54.7014
FAM78B	0.39206	0.274722	0.261052	0.531709	0.563104	0.813469	0.955908	1.07421	1.27151	0.519935	0.298819	0.334175	0.306933	1.04871	0.571178	0.774963	0.620112	0.90309
POGK	119.746	124.907	130.944	106.98	113.121	117.302	112.691	120.956	112.741	108.212	126.002	120.303	103.989	110.215	106.287	102.176	104.551	99.9204
TADA1	35.0614	40.2926	34.9288	23.6611	24.5263	21.3129	22.7825	23.4715	22.8342	32.301	32.8701	35.1719	24.616	23.3713	25.7506	25.5738	24.7425	23.4803
POU2F1	48.6154	27.7469	43.8568	43.7065	29.4065	39.5346	42.3255	36.6842	38.3572	37.5653	48.6577	35.6731	37.0775	37.1544	26.4646	37.5559	39.1911	31.8662
CREG1	89.9498	93.3598	87.7658	115.913	120.379	116.001	127.614	127.562	121.8	118.805	91.1896	93.1512	125.597	128.592	130.514	154.218	154.594	160.105
MPZL1	99.1912	115.246	110.216	97.994	111.369	113.615	96.2281	101.029	101.456	93.9133	107.575	111.071	99.9372	111.513	112.665	96.2146	106.597	109.79
MPC2	79.9242	105.585	84.7898	66.3042	72.6404	73.2122	60.116	61.8207	66.9132	81.6298	86.1595	93.4854	69.7351	69.0653	79.7269	76.8405	79.3744	88.6318
DCAF6	122.043	129.898	117.474	137.021	139.963	140.459	137.651	130.463	138.595	114.126	123.711	123.478	148.678	144.673	152.743	147.839	145.726	141.205
GPR161	2.57639	2.19778	2.976	4.25367	4.19199	3.6335	5.94787	6.28412	5.4569	3.1846	2.93839	2.79871	4.35844	3.89522	2.95109	3.57675	4.83688	3.54785
TIPRL	78.636	102.242	75.1831	70.4515	76.2067	67.301	68.613	66.3324	66.7543	90.8587	79.9341	90.9373	72.6816	70.6633	83.154	70.1043	66.6	71.5376
SFT2D2	45.3109	36.4465	38.7402	42.4304	39.7926	41.5954	40.7323	37.0065	35.6553	37.1754	46.8648	33.1668	51.3191	43.2969	40.744	36.4233	33.238	34.9625
ATP1B1	56.4006	59.0195	53.1503	65.8256	79.0848	60.3594	71.3214	84.7551	60.9795	74.1558	77.693	73.3931	84.4065	96.9311	82.0592	103.905	99.7761	85.213
NME7	8.96137	10.4852	8.30147	12.8674	12.0129	9.76163	7.59416	6.23041	6.99331	12.0235	8.86497	9.81638	13.1367	12.0852	14.3746	9.00149	7.87542	10.6436
BLZF1	29.5165	42.5362	34.3545	40.4099	47.9889	42.6258	37.0149	36.4157	38.4632	32.041	37.8504	38.1377	41.6201	46.2932	49.6925	37.079	38.0749	35.7365
SLC19A2	56.7367	58.9737	52.9936	65.2407	65.0072	59.2206	62.134	55.644	55.0458	52.6434	40.739	40.2263	46.1013	45.4942	41.6484	43.4575	39.8112	37.1557
C1orf112	19.827	33.0582	25.5831	8.45418	11.9503	9.00239	5.68234	6.6601	4.76816	12.2835	25.7981	27.277	9.02382	9.98775	9.18645	4.53055	5.27095	6.25712
METTL18	12.6019	19.1848	12.7394	11.6976	15.6418	11.9851	11.3647	12.9979	12.2913	14.8831	12.899	15.1214	12.0318	12.235	14.3746	13.5917	13.5805	15.159
SCYL3	24.8118	25.4118	21.4063	30.1479	28.0926	28.9595	33.6692	30.5613	32.3705	28.4665	24.2043	24.0188	28.8517	27.2166	32.0336	32.8465	31.5017	31.2211
KIFAP3	11.9298	11.9504	12.7394	23.6611	19.3958	19.6317	26.7654	23.364	22.5163	17.4178	12.7496	11.529	23.6952	20.1253	19.4201	24.0238	24.3084	22.8353
GORAB	12.3219	19.0016	12.896	11.5913	14.5781	13.1782	12.1613	12.7831	12.7151	16.9629	13.3473	15.0796	14.7941	13.5334	17.4685	14.3666	14.2006	14.643
FMO4	7.39313	5.9981	5.53431	7.39076	5.6936	6.07391	8.8687	7.46575	8.95355	5.13436	4.83091	5.9316	6.44558	6.89155	7.04453	7.98808	7.31732	8.70836
PRRC2C	369.377	238.55	403.013	394.05	285.556	372.352	317.574	308.352	362.592	272.446	377.16	280.749	351.99	347.774	280.258	288.525	308.816	280.345
VAMP4	18.9869	18.9558	16.3419	21.3747	18.0193	19.1436	16.8877	14.663	14.8873	21.5773	17.1323	18.7138	22.8972	20.2252	24.3227	20.4471	17.7972	20.4485
PIGC	37.4137	47.5727	34.1457	38.3894	39.0418	35.9553	40.4137	39.9606	34.5957	40.6199	36.2567	38.806	39.3488	38.9522	38.2689	40	37.6408	37.8653
SUCO	155.2	162.773	161.644	172.167	159.734	172.781	145.617	139.379	150.674	145.062	161.412	160.487	173.233	177.083	182.777	151.535	162.779	161.072
PRDX6	367.36	398.027	368.815	333.701	373.15	342.145	309.927	314.636	305.056	403.535	371.432	379.581	372.678	380.334	375.788	359.702	335.915	352.205
KLHL20	23.5796	27.6096	23.0248	25.5752	22.5241	23.6991	24.3226	25.2976	24.9004	27.6216	24.1047	27.2352	24.1249	25.4188	27.0358	24.7392	23.9983	23.2868
CENPL	35.6215	44.3676	36.6518	11.9103	11.8252	11.2801	8.44386	7.25091	8.37077	32.496	35.1112	36.0909	9.76046	13.1838	13.7083	8.22653	9.17766	10.2565
DARS2	248.958	270.876	262.41	96.0267	98.418	103.744	59.6381	57.2553	65.1119	213.043	226.953	249.211	87.1688	93.8849	106.049	61.7586	64.3056	70.6345
GAS5	142.598	196.701	149.635	143.083	147.158	128.257	153.211	141.634	134.674	181.522	138.752	176.737	153.528	122.35	147.174	149.687	132.394	140.559
GAS5-AS1	2.40837	1.19046	1.5141	1.11659	0.938506	0.488082	1.22144	0.859367	0.688735	1.81977	1.29488	1.42024	1.04357	0.848959	0.761571	1.07303	0.868157	1.0321
ZBTB37	34.9494	24.8166	34.6678	37.5387	28.03	36.7146	57.7793	51.0249	54.1981	38.8652	33.0693	32.9998	39.6557	36.9547	33.9851	55.8569	46.7565	46.5091
RC3H1	48.1114	39.56	45.7364	61.9973	56.3104	60.7933	60.594	59.8872	56.2643	45.7543	44.1754	42.0225	60.0974	56.4308	52.596	59.4337	59.4067	53.0243
RABGAP1L	41.4463	37.1333	41.8206	49.6085	41.8574	44.5239	48.592	45.9762	47.4167	41.6598	40.3406	39.5162	45.6102	45.1446	45.7418	48.8823	45.5782	47.0897
CACYBP	186.565	264.878	218.396	110.17	130.014	119.688	97.5026	99.6329	98.0122	169.044	209.671	215.25	114.118	120.203	125.992	104.501	105.977	96.05
MRPS14	43.5187	52.1972	40.2543	46.7372	47.7387	41.8666	40.7854	41.1422	40.4764	46.0793	41.9343	47.3693	47.6359	46.8925	51.1204	45.6632	43.4079	46.8962
KIAA0040	63.4577	61.5378	69.5444	68.2183	56.3729	73.2122	32.7133	31.3669	39.1519	71.1661	68.828	74.4792	55.6162	60.7255	72.1112	42.3845	45.7023	53.2823
COP1	87.2054	101.785	88.6012	97.7282	101.171	93.1151	95.4315	101.083	99.2308	97.8778	92.5343	96.117	102.884	101.476	104.335	103.07	102.319	100.63
BRINP2	16.8586	15.8881	19.2657	7.8693	8.94709	8.51431	2.23045	3.16892	2.596	17.8728	12.5504	15.8733	13.9961	8.43965	11.138	3.3383	3.22458	2.19322
SEC16B	0.560086	0.183148	0.313263	1.16976	0.688238	0.759238	0.318636	0.161131	0.0529796	0.714911	0.298819	0.626578	1.90298	1.04871	1.71353	0.4769	0.434079	0.322532
RASAL2	23.0195	22.1151	25.8964	24.9903	22.399	22.7771	23.3135	21.2693	24.9004	20.2775	24.1545	20.3011	21.4853	22.872	23.8943	23.1297	20.5877	21.2871
RALGPS2	94.9905	87.3617	91.4728	92.3579	85.6543	90.8374	88.2622	80.0823	86.7806	85.5294	90.6418	83.5854	99.0164	91.5877	98.433	84.4113	81.7308	78.6333
FAM20B	188.749	180.309	192.813	128.993	120.129	126.413	126.445	120.687	123.866	163.91	181.782	179.326	126.947	124.497	134.75	125.425	120.674	125.529
TOR3A	106.528	128.021	102.75	86.775	89.7837	86.6074	66.4356	76.2689	67.1781	101.062	106.23	110.278	85.3273	84.2467	85.6767	71.5946	72.8632	71.0215
ABL2	45.647	28.5711	41.7684	55.67	42.483	49.4047	46.7333	48.0172	48.2114	35.9405	40.0916	32.958	49.6003	44.5953	40.4584	43.5768	45.7643	36.7686
SOAT1	17.9788	25.1371	20.3621	16.2171	20.6471	17.2998	15.1352	19.0672	15.47	18.6527	23.3079	24.6454	24.3704	22.023	23.6563	20.6259	23.3782	20.5775
TDRD5	11.9858	13.1409	12.896	11.0596	12.8888	14.1544	14.3917	14.7704	14.9402	14.4282	14.6421	13.7847	11.4179	13.6832	15.3742	13.8301	16.433	14.9655
TOR1AIP2	74.8835	81.9588	78.4201	76.4598	90.2843	86.4989	80.1901	87.4943	89.5885	70.7762	74.8044	81.7893	81.0302	86.3441	86.0099	72.5484	79.7464	83.9873
TOR1AIP1	99.8073	123.625	101.027	91.5603	91.6607	93.1694	103.397	100.922	107.284	96.253	100.154	111.531	96.8065	94.7838	105.287	98.1818	95.8693	103.21
CEP350	97.903	69.8252	94.6054	77.4169	65.4451	79.015	78.9686	77.2894	82.4362	82.6047	90.7414	76.3171	80.7233	70.2139	67.4466	70.8793	71.747	62.1197
QSOX1	579.745	455.81	595.774	1039.92	897.462	1086.09	1354.73	1193.18	1304.46	487.894	619.85	513.167	915.027	1037.63	894.036	1342.35	1507.12	1443.27
LHX4	5.2088	5.49444	5.53431	2.81806	2.62782	1.8981	1.22144	1.45018	1.69535	4.09449	7.22146	5.88983	1.96437	2.89645	1.95153	2.26528	1.17821	1.41914
ACBD6	98.127	91.7114	94.1877	68.9095	69.95	60.3594	76.0478	68.0512	66.1185	105.222	88.7493	93.0676	64.9469	59.9765	61.6396	72.9657	61.019	60.7005
XPR1	97.1189	103.616	110.843	102.514	110.619	113.506	123.047	135.136	135.257	78.6402	109.667	111.364	94.3511	106.919	107.619	110.104	137.851	127.787
KIAA1614-AS1	3.9206	2.4725	2.92379	4.89173	3.06579	3.74196	3.34568	3.65231	3.39069	4.61443	3.78504	3.38352	4.17428	3.84528	3.28427	3.8152	3.34861	3.35433
STX6	114.538	113.964	126.454	132.077	148.784	142.683	151.511	157.962	160.687	115.361	126.749	121.765	126.211	146.071	131.181	132.817	149.199	145.333
MR1	18.5948	17.2159	15.872	37.7514	35.9761	32.7557	16.7815	16.7577	17.9071	24.502	18.975	19.4239	47.5745	41.2494	46.0274	22.1162	25.6726	24.1899
IER5	270.297	207.919	216.517	316.792	315.401	337.698	391.126	385.373	411.545	338.413	271.527	244.198	400.117	291.792	242.56	506.051	391.167	340.981
GLUL	282.843	303.019	253.482	374.855	405.81	366.115	444.391	454.874	414.194	303.252	296.827	287.056	418.042	407.65	410.391	439.523	423.537	388.651
RNASEL	14.9543	14.4229	19.8922	28.3933	30.9081	28.9053	16.8346	18.0467	22.3574	12.3485	18.8256	17.2935	29.5269	35.6063	33.7471	17.1088	23.3782	23.0288
RGS16	39.318	44.505	50.5397	24.7777	25.0894	35.413	37.8115	34.6432	46.0922	27.9465	27.3419	34.2111	13.5664	13.883	13.4703	27.1833	23.3162	33.0918
NPL	3.08047	4.30398	3.4981	3.61562	3.50376	3.30811	3.29257	2.95408	3.92049	2.14473	3.68544	3.55061	3.31487	3.74541	4.18864	2.8614	2.60447	2.70927
DHX9	426.057	390.472	440.187	344.494	330.417	334.824	319.433	321.511	309.719	328.339	450.968	387.601	320.131	347.973	307.865	295.082	316.133	274.41
LAMC1	148.031	117.49	152.037	201.943	175.626	202.717	166.54	168.812	170.117	113.996	159.918	126.402	177.284	213.488	170.449	131.982	173.259	149.526
LAMC2	2.12833	1.73991	2.76716	17.5464	18.8953	14.8594	4.30159	4.18942	4.07943	1.81977	1.89252	1.25316	10.3129	11.0864	9.56723	1.37109	2.04637	1.93519
NMNAT2	5.04077	4.67028	4.90779	12.4952	12.9514	11.8224	16.3567	16.2743	17.1654	7.08412	6.57402	5.6392	12.4615	15.3811	10.3764	15.6185	19.7196	16.7717
SMG7	198.998	170.282	208.163	221.457	213.166	224.572	209.663	220.75	218.011	157.475	217.491	188.433	205.399	221.628	212.907	188.972	203.149	199.518
NCF2	0.112017	0.045787	0	2.49903	3.81659	2.65733	1.85871	2.14842	0.953633	0	0	0	0.18416	0.249694	0.142795	0.119225	0.0620112	0.0645064
ARPC5	170.378	232.094	175.688	197.317	232.749	201.957	203.024	209.202	191.627	158.125	185.666	188.809	205.154	208.095	216.334	189.687	197.816	194.809
RGL1	0.39206	0.503657	0.783157	2.12684	1.25134	1.19309	1.96492	2.36326	2.01322	0.519935	0.498032	0.375947	0.859411	1.19853	0.951963	2.08644	1.86034	1.93519
TSEN15	59.5931	75.3655	54.56	30.2011	36.1638	32.0507	27.4027	29.2185	27.2845	103.272	53.14	63.4096	30.4477	32.6599	36.6506	28.614	27.719	30.705
C1orf21	115.042	98.7626	92.7258	123.676	128.075	133.734	201.75	179.017	191.733	120.43	108.87	95.6157	109.759	119.553	123.47	223.547	219.334	211.645
EDEM3	55.1684	58.2411	63.9056	69.7071	80.2735	84.7635	70.8434	81.1028	86.3037	52.9684	66.5371	62.1983	73.2341	91.1882	91.6265	76.1252	96.6135	86.1805
NIBAN1	0.896137	0.412083	0.313263	0.903906	0.500536	1.41001	0.79659	0.698236	0.847673	2.20972	1.44429	0.793665	0.982184	1.44822	1.04716	1.96721	1.79833	1.74167
RNF2	30.3006	31.6388	22.2939	34.1357	38.4162	31.1288	36.059	36.6305	37.7744	24.177	29.8321	29.4491	35.7883	35.7562	38.4117	37.6155	38.819	37.0267
TRMT1L	31.5888	42.9024	39.7844	31.3708	41.9825	37.9077	38.1832	42.1627	41.0592	37.5003	41.3864	41.6465	33.1487	41.549	40.0301	41.4307	43.7179	45.219
SWT1	3.80858	4.85343	3.39368	3.19026	4.88023	4.3385	6.63825	5.6396	6.83437	4.15948	4.13366	4.97085	3.80596	4.34467	5.71178	5.06706	5.89107	5.41854
IVNS1ABP	132.572	170.007	159.033	103.417	121.38	117.845	88.3684	100.868	113.217	138.368	152.896	166.586	104.234	122.799	133.418	99.9106	123.65	120.885
TPR	206.784	164.101	216.151	160.789	153.289	166.653	174.613	168.382	186.488	181.782	204.243	170.095	156.351	152.763	134.084	159.881	147.463	138.237
ODR4	38.2539	51.8767	39.941	47.4816	49.5531	48.8082	40.9447	40.1754	38.7811	43.6746	42.0339	41.3123	50.2756	47.1422	53.6431	46.3785	42.3537	44.1869
UCHL5	95.2706	120.695	106.614	63.1671	72.8281	68.7653	46.2553	47.0504	46.9929	92.2885	98.0127	106.435	64.0875	62.4734	76.4903	50.9091	46.0123	45.2835
RO60	84.4609	78.2958	82.2315	79.1183	84.5907	80.425	96.0157	88.9982	85.1912	80.9149	79.6353	74.2703	75.9965	82.4489	85.4387	79.5231	82.2889	77.7947
GLRX2	34.3893	39.1021	32.3183	30.6796	34.975	30.9661	30.9608	30.615	30.1454	38.6702	33.7168	34.5871	32.2893	32.1106	34.6991	32.1908	29.9514	29.931
CDC73	115.266	119.916	118.361	121.974	123.069	126.088	112.16	118.378	123.654	114.191	114.547	117.504	119.458	124.847	132.846	113.8	118.503	114.241
ASPM	95.1026	84.2023	107.397	10.3683	10.261	14.2628	1.48697	0.913078	2.38408	80.2	96.7178	86.1753	8.71688	11.6357	11.7567	1.13264	3.65866	4.25742
ZBTB41	66.3142	84.4771	78.7334	69.7603	73.3912	79.6658	73.4987	79.4378	85.9859	70.9712	79.6851	83.293	74.8302	79.6024	90.1033	68.8525	80.7386	79.7944
DENND1B	40.0461	44.2303	38.949	54.1812	49.9285	53.3094	46.7333	49.1988	45.4565	39.775	42.0837	38.9314	50.9508	53.0849	58.3554	44.1729	47.6866	42.3162
C1orf53	2.80043	3.70875	3.23705	3.08391	4.19199	3.36234	3.02704	2.90036	2.70196	4.0295	3.0878	3.92655	3.31487	3.69547	4.14104	2.8614	3.78268	3.61236
NEK7	102.664	138.872	103.847	91.0286	99.1062	97.4536	103.397	98.1827	103.151	108.666	106.778	114.455	97.0521	106.619	119.995	100.566	111.062	106.371
NR5A2	0.39206	0.77838	0.991999	0.106342	0.125134	0.162694	1.16833	0.913078	0.635755	0.649919	0.846654	0.751893	0.0613865	0.249694	0.142795	1.4307	0.930168	0.774077
ZNF281	41.3343	38.3237	36.2863	41.8455	42.6082	39.4262	51.1411	52.0991	49.7478	33.2759	36.8046	36.4668	43.3389	45.3444	39.3637	46.1997	51.9654	42.3807
KIF14	58.473	63.5982	82.4403	4.67904	4.5674	7.26699	0.371742	0.161131	0.953633	50.8237	65.8896	65.2476	4.1129	6.29228	6.80654	0.298063	1.36425	2.19322
DDX59	33.6612	35.8512	32.5793	28.2338	26.2156	27.8749	29.7394	30.7224	31.099	36.8504	30.2803	33.9605	25.1071	26.5175	29.0825	34.456	31.6257	30.06
CAMSAP2	113.641	98.1674	118.257	137.341	126.511	142.194	123.206	125.79	127.628	94.3033	119.777	103.845	126.947	135.434	134.417	106.885	116.643	105.145
INAVA	0.39206	0.320509	0.626526	1.22293	1.00107	0.921932	1.38076	1.71873	1.64237	0.129984	0.298819	0.668349	1.53466	1.44822	1.14236	0.536513	1.1162	1.0321
TMEM9	126.187	149.907	110.582	130.003	124.634	116.38	116.196	113.436	112.052	152.081	120.823	134.088	143.153	129.391	135.845	129.061	122.41	137.979
PKP1	26.156	12.1793	20.4665	14.6752	8.13372	12.9613	20.552	17.5096	25.0064	29.8313	20.0209	22.0138	16.0833	14.4822	12.2327	19.3741	25.1766	19.0294
LAD1	148.311	117.947	142.796	144.944	136.021	147.455	142.855	143.89	161.8	122.445	128.193	123.185	101.472	115.558	107.429	98.0626	110.07	111.145
PHLDA3	56.5687	48.8548	59.2589	64.4432	72.8906	80.6962	98.5648	107.851	105.27	63.1721	69.1766	61.7388	57.2122	72.611	58.9265	72.0119	111	87.1481
CSRP1	294.829	268.175	267.318	467.745	543.207	520.566	648.902	646.889	666.801	231.891	237.511	227.949	306.933	337.736	323.906	369.538	408.716	418.905
NAV1	12.826	8.92847	13.3659	11.8571	10.5113	13.5036	13.4889	16.8114	13.9866	7.47407	9.81123	8.56323	7.61193	7.69057	6.90173	7.45157	7.1933	6.25712
IPO9	110.673	108.744	123.165	77.5764	72.9532	79.1777	60.9126	59.3501	65.2708	98.2028	121.52	111.071	67.2182	76.8058	74.6339	51.6841	61.019	59.3459
SHISA4	13.274	11.6757	11.7996	20.0986	18.3947	17.6252	18.9588	17.1873	14.8343	12.8034	13.9947	12.7404	18.2318	17.2788	15.5646	17.5857	16.2469	17.8683
TIMM17A	72.5311	97.3432	77.2193	60.9339	65.8205	60.8475	55.2834	53.4956	56.9531	66.7467	70.0233	77.069	60.0974	61.7243	66.7326	59.0164	55.004	59.2814
RNPEP	133.524	145.328	148.434	163.447	176.502	166.056	99.1489	111.503	117.456	117.44	147.268	143.653	151.256	172.439	163.167	97.5261	110.504	122.175
ELF3-AS1	1.45622	0.915741	1.20084	3.66879	4.7551	4.06735	3.98295	3.27634	3.39069	1.75478	0.697245	1.0443	1.8416	2.94639	2.5703	3.51714	3.78268	5.54755
ELF3	25.82	22.0693	21.7718	67.6334	87.0308	85.2516	83.9606	94.799	92.8202	32.8209	22.6106	25.5644	42.725	49.739	47.4078	71.2966	65.9179	76.8271
GPR37L1	8.5133	6.22704	7.04841	19.2479	14.7658	16.2152	10.5681	9.56046	8.79461	6.04425	5.42855	6.224	9.14659	8.18996	8.52007	7.51118	5.20894	4.83798
ARL8A	60.7693	57.0506	56.8572	88.955	95.2896	92.0847	99.9455	104.521	91.2308	56.413	61.2081	58.1464	74.2777	77.8046	71.2545	84.769	83.6531	82.0521
UBE2T	77.2918	111.491	82.8058	11.4849	10.6364	12.3647	6.90378	6.87494	8.74163	85.6593	70.5213	84.8804	8.77827	10.1875	11.9471	7.86885	9.05364	10.7726
PPP1R12B	34.0532	23.3972	36.4951	25.203	22.8995	32.7557	33.9347	33.6227	41.3241	29.4413	29.8819	29.4909	26.0893	27.6661	26.0362	31.2966	35.2224	30.705
KDM5B	234.284	181.271	225.758	427.76	411.316	431.193	560.481	552.949	567.57	249.959	251.606	209.068	411.781	428.924	359.033	455.917	515.251	429.806
PCAT6	6.88905	3.93768	5.27326	10.262	7.94602	9.00239	10.8336	10.6347	11.3376	6.17423	6.12579	6.59995	9.26936	9.788	7.7585	10.0745	10.914	10.063
RABIF	35.2294	41.3457	36.8606	43.866	47.4884	48.1032	47.5299	51.562	49.271	34.7057	40.3406	39.5997	44.9349	47.7415	47.4554	39.3443	48.3688	46.1221
KLHL12	69.3386	70.4662	71.7372	67.2081	65.8831	68.0603	74.9326	75.2484	75.0191	81.4349	67.0849	74.6045	70.7173	69.7644	73.8248	73.383	74.9096	74.1179
ADIPOR1	244.085	250.455	247.008	263.728	257.276	259.714	273.549	276.555	265.64	239.755	250.659	249.67	261.875	260.431	267.454	285.484	284.942	291.311
CYB5R1	58.0249	58.5616	46.1541	123.569	121.505	110.361	178.224	163.387	156.608	66.0968	61.9054	56.8097	126.64	127.294	119.233	182.653	186.096	181.779
TMEM183A	162.257	225.043	169.684	151.697	172.935	161.175	152.467	157.801	156.661	168.459	178.295	199.669	158.193	171.49	185.918	158.092	164.95	183.005
PPFIA4	2.24034	2.28935	3.13263	2.18001	1.31391	1.46424	0.212424	0.107421	0.370857	1.75478	2.78898	2.71517	2.57823	0.79902	1.95153	0.23845	0.0620112	0.258026
ADORA1	6.04893	6.13546	10.0244	18.7162	16.8931	13.3951	1.43386	1.34276	1.05959	6.36921	6.87284	6.05692	19.1526	18.727	18.7537	2.26528	1.36425	1.61266
BTG2	50.2957	34.5234	34.72	67.2081	74.2671	59.4917	227.825	222.737	186.435	64.147	51.6459	37.6782	64.3331	65.0203	49.0737	269.151	205.009	190.294
ATP2B4	76.7878	51.0525	71.2673	61.1466	47.9264	62.4202	57.7793	52.2066	55.6286	61.6773	62.005	56.5173	49.5389	52.2359	44.1711	30.8197	35.5944	35.7365
ZBED6	4.20064	1.55676	4.22905	6.96539	4.44226	6.39929	7.27552	6.55268	6.99331	4.54943	4.03406	3.34175	6.01588	6.39216	4.95021	5.2459	7.25531	8.83738
SNRPE	114.762	147.572	119.04	87.9979	105.488	87.8005	77.3224	80.0823	79.2045	118.35	106.778	115.792	88.2738	85.0956	93.6256	80.1192	74.4135	83.2778
SOX13	120.754	97.7553	121.911	104.056	113.246	130.426	152.574	156.727	161.323	128.229	125.952	113.16	109.145	123.449	102.812	156.185	174.81	158.621
ETNK2	56.5127	55.8602	57.4837	44.8763	37.29	40.2396	36.9087	37.9733	36.8738	46.0143	49.355	55.5983	38.919	38.7525	35.5558	35.1118	32.4319	34.5754
KISS1	0.672103	0.366296	0.626526	0.903906	0.813372	0.650776	1.22144	1.12792	0.847673	0.974879	0.896457	0.501262	0.675252	0.998775	0.856767	1.49031	1.36425	1.35463
GOLT1A	12.882	10.9431	10.0766	13.2927	12.8888	14.8594	15.7194	14.8778	14.8343	16.5079	9.16379	11.1949	14.5486	13.9829	11.8519	17.1088	15.1927	17.7393
PLEKHA6	122.659	83.2408	115.02	112.191	107.49	127.823	134.411	125.414	158.462	139.863	115.992	106.393	115.591	115.359	108.333	137.288	143.866	155.912
PPP1R15B	224.706	204.531	211.452	319.876	324.348	329.347	424.105	443.38	414.247	230.721	214.801	192.234	276.362	279.557	261.838	304.441	310.242	288.279
PIK3C2B	92.9182	63.5524	88.2357	115.168	112.496	122.78	162.133	174.398	172.819	89.4939	96.5186	74.3121	95.3946	110.514	86.7239	109.27	130.286	117.402
MDM4	37.6938	39.4684	38.4791	27.6489	30.6579	31.5626	32.6071	28.8425	30.1984	42.7647	36.0575	38.2212	33.3943	26.6673	33.4615	33.9195	26.5408	27.0927
LRRN2	8.34528	6.27282	8.87578	26.4791	19.083	23.0483	18.0029	18.745	17.1124	6.17423	7.96851	9.89993	20.012	21.8232	18.5157	11.7437	12.6503	12.7723
TMEM81	1.84828	1.32782	2.03621	1.16976	1.18877	1.41001	1.64629	1.66502	1.74833	1.36483	1.79291	1.3367	0.798025	1.29841	0.856767	0.596125	1.1162	1.0321
RBBP5	55.2805	71.0615	61.2951	49.0768	57.3114	50.5978	51.0349	50.1119	51.0723	49.4588	64.5947	61.3628	48.1884	53.784	50.3113	39.0462	49.733	42.2517
DSTYK	67.6584	49.9536	62.1827	74.3861	65.0072	72.2903	96.8123	90.9855	87.8931	59.9225	62.1046	53.7186	71.3311	72.4611	61.1637	81.2519	80.2425	67.4092
TMCC2	1.00815	1.09889	1.56631	0.691222	1.18877	0.542313	0.318636	0.322263	0.317878	0.454943	1.09567	1.50379	0.798025	0.39951	0.142795	0.357675	0.49609	0.258026
NUAK2	14.1142	11.3552	15.5587	11.0064	11.1995	11.2801	21.2424	20.2488	17.3243	20.0825	16.4849	14.6201	11.111	12.6345	9.90042	16.93	17.6112	14.772
CDK18	49.4556	35.897	40.8286	60.03	45.6114	45.9881	26.4999	23.3103	21.7216	57.0629	43.03	45.2389	68.9371	50.8876	54.3095	31.8927	22.138	24.7705
ELK4	93.0302	80.1731	93.3523	89.7525	97.1041	99.9483	126.658	123.91	121.323	85.7893	94.6261	87.0525	101.349	102.474	91.1505	115.171	115.217	101.082
SLC45A3	4.42468	3.84611	4.54231	6.54002	6.31927	6.34506	3.39878	2.95408	3.49665	2.59968	3.33681	3.42529	3.86735	4.04504	3.47467	2.02683	1.79833	1.87069
NUCKS1	1167.95	1015.37	1155.78	686.224	656.766	709.074	735.837	684.808	742.933	1134.17	1122.96	1008.37	678.26	697.644	694.648	726.498	732.849	723.762
RAB29	54.9444	62.2704	53.7246	68.0588	67.8853	65.186	59.4787	54.3013	65.6947	48.8089	53.14	57.7704	64.9469	61.175	68.8746	51.8629	51.2833	55.153
SLC41A1	61.2174	41.3457	58.3191	59.3919	48.1141	57.0513	73.2863	60.3706	67.9198	54.9182	65.4414	58.0211	59.4221	59.1774	55.9755	72.4888	74.5375	72.5052
RAB7B	0.39206	0.228935	0.261052	1.06342	1.12621	1.41001	2.01803	1.87987	1.21853	0.649919	0.747048	0.292403	0.798025	0.39951	0.285589	0.655738	0.620112	0.645064
FAM72A	17.6427	25.5492	25.061	2.60538	3.12835	3.90465	1.7525	1.45018	1.80131	16.053	21.7142	24.7289	2.20991	2.99633	3.76026	1.60954	2.35643	2.19322
SRGAP2	112.857	106.409	137.47	66.7295	75.7687	88.3428	111.47	109.14	117.721	94.5632	126.948	110.737	65.4994	75.2078	69.5885	77.6155	93.0788	84.3744
IKBKE	7.61717	5.49444	5.69094	11.6976	9.25992	8.35162	4.62022	3.38376	3.97347	8.44895	6.47441	6.85058	11.8476	9.08885	9.09125	5.00745	5.14693	4.90249
RASSF5	7.67317	4.30398	6.10863	6.32734	5.19307	7.32122	7.38174	6.06928	7.36416	4.87439	5.87678	6.01514	6.50697	6.79167	5.47379	6.55738	6.94526	7.99879
EIF2D	89.1096	84.2023	84.3199	75.5559	70.6382	69.9584	88.8464	88.1926	79.4694	101.517	83.9184	85.8411	78.3906	70.8132	76.871	92.9955	83.9632	87.9867
DYRK3	5.82489	5.21972	5.95199	7.23125	8.07115	7.86354	5.94787	8.48625	6.62245	4.67942	6.77323	6.68349	9.33075	8.73928	7.8537	4.59016	9.05364	7.35373
MAPKAPK2	237.084	222.479	267.526	235.122	250.894	277.122	275.036	318.342	319.573	168.459	207.53	195.743	171.882	201.852	173.448	176.453	220.326	207.711
IL20	17.6987	16.2086	16.133	2.0205	1.43904	1.35578	3.39878	2.79294	3.49665	10.7237	7.47048	6.85058	1.3505	0.848959	0.856767	0.894188	0.558101	0.645064
IL24	1.90429	1.28204	1.14863	0.212684	0.187701	0.108463	0.053106	0.161131	0	0.974879	0.298819	0.417718	0.245546	0.149816	0.0951963	0	0.0620112	0
FCMR	13.33	11.9962	13.5747	3.93465	3.62889	3.25388	6.79757	8.2177	6.35755	12.3485	8.36694	10.443	3.13071	3.0962	2.7131	3.45753	3.28659	3.0318
PFKFB2	14.1702	10.2105	10.912	13.1864	11.6375	14.1001	12.4268	12.5145	13.9336	14.4932	11.1061	11.1949	13.0753	14.5821	14.9458	11.0879	12.5263	11.5466
CD55	111.345	99.3121	90.9507	87.9447	88.595	90.2951	178.967	154.203	161.959	149.806	92.4347	97.4955	88.7035	86.5938	91.5789	166.021	154.222	152.816
CD46	178.443	210.3	165.716	209.281	209.912	206.784	228.728	213.016	232.421	227.927	180.686	187.848	232.594	213.638	257.982	282.981	268.943	280.409
PLXNA2	0.78412	0.595231	1.09642	1.86098	1.31391	1.62694	1.85871	2.84665	1.96024	1.6248	0.946261	0.626578	1.53466	2.09743	1.47554	1.07303	1.61229	1.67717
LAMB3	6.04893	4.76185	6.73515	16.5893	17.2059	16.7575	13.542	14.3944	11.9734	4.54943	4.98032	3.80124	10.006	10.7868	7.42531	2.74218	5.08492	3.61236
C1orf74	9.1294	8.74532	9.03241	7.60344	7.75832	8.78547	14.7104	13.0516	13.6158	6.56418	7.17166	9.69107	6.99806	7.0913	6.99693	11.0879	9.67375	8.77287
IRF6	30.7487	21.1078	28.1937	24.565	23.5252	28.6884	170.152	136.747	146.012	19.9525	17.7299	20.0505	15.408	14.2825	14.8982	71.4754	59.3447	64.0549
UTP25	25.6519	22.1609	20.9364	16.483	17.769	17.1913	31.6512	26.533	29.8805	22.0972	18.726	19.7581	16.2674	13.034	14.1843	21.7586	19.1615	18.7714
KCNH1	1.00815	0.595231	1.09642	0.531709	0.312835	0.759238	0.106212	0.107421	0.211918	0.779903	1.89252	1.29493	0.368319	0.79902	0.52358	0.0596125	0.186034	0.129013
RCOR3	39.15	35.3934	34.0934	35.0396	29.6568	32.7015	39.2453	38.0807	35.3374	38.6702	35.9081	33.4592	39.7171	32.3603	34.6991	42.921	32.928	37.9943
TRAF5	30.9727	36.3091	31.744	23.8206	31.0958	29.6103	37.3866	39.1012	40.4234	32.301	31.7246	30.7441	20.5645	25.2191	23.0375	32.7869	35.4704	37.7362
LINC00467	12.938	14.9724	11.3819	8.93272	9.25992	8.73124	8.8687	7.1972	8.68865	16.8979	13.0484	15.6227	11.0496	9.98775	12.1851	10.4322	9.36369	8.83738
SLC30A1	62.8416	48.4427	45.4753	66.7295	66.1334	55.2617	85.3945	74.2816	71.8403	65.7718	54.6341	55.5148	67.8321	67.8668	59.4501	78.152	78.9403	67.4737
NEK2	34.6133	47.4811	37.3827	2.9244	3.37862	3.74196	0.26553	0.268552	0.582775	43.8045	35.9579	39.6832	3.25349	4.44455	4.85501	0.536513	1.6743	1.93519
LPGAT1	81.5485	78.6163	90.0631	88.2106	87.719	102.063	108.92	103.876	116.608	83.7746	82.6235	88.3057	84.0381	81.5001	94.3872	95.6185	104.241	104.436
INTS7	29.0124	38.5069	32.0572	23.5547	27.4044	29.1764	12.6923	13.7499	17.3773	29.5063	29.9815	33.3339	25.7823	29.0644	30.32	13.9493	17.5492	17.3522
DTL	46.039	45.3749	47.7204	9.03906	7.44548	10.087	0.53106	0.429684	1.05959	33.7958	41.4861	42.482	7.42777	8.83916	8.80566	1.54993	2.41844	2.12871
PPP2R5A	76.1157	81.272	82.7536	70.6642	73.5163	77.7134	63.8865	65.6342	66.3834	78.2503	84.9642	89.2664	84.2223	95.2832	98.8138	76.8405	76.6459	79.7944
PACC1	8.23326	11.9504	9.9722	11.0064	10.9492	10.6293	6.85068	6.98236	7.04628	6.49919	10.7077	10.5683	10.2515	9.68812	8.90086	6.14009	7.93744	7.86978
NENF	35.5094	45.787	38.4269	39.0275	36.4766	39.0465	29.9518	30.4001	28.1851	42.9597	37.1034	41.1453	51.5647	44.4455	41.5056	33.2042	37.7028	41.4131
ATF3	11.5938	11.7673	14.6189	37.2728	47.6135	64.1556	43.9718	47.5338	67.3371	15.5981	8.11792	7.14298	14.9783	18.8769	14.4222	15.9762	11.7201	12.5787
NSL1	18.8749	29.8531	21.9806	12.5483	12.4508	14.9678	11.2054	13.9647	12.2383	21.6423	21.9134	22.6821	12.4615	14.2325	15.6598	11.5648	11.9682	13.4173
TATDN3	7.00107	10.0731	7.36168	6.75271	6.069	6.29083	6.05409	4.40426	3.86751	11.9585	7.8689	8.73031	7.7347	5.89277	7.66331	4.769	5.27095	5.16051
FLVCR1-DT	1.51223	1.0531	1.35747	0.903906	1.06364	0.813469	0.584166	0.644526	0.794694	0.974879	1.14547	1.25316	1.04357	0.599265	0.904365	1.13264	0.868157	1.35463
FLVCR1	13.162	14.2856	14.2535	9.83662	9.8856	11.1716	8.44386	9.72159	8.95355	12.0235	13.7457	13.6176	11.4793	10.637	10.186	9.23994	10.2939	9.93399
VASH2	4.20064	4.5787	3.70694	1.38244	2.12728	1.41001	3.02704	2.95408	2.27812	3.89951	3.68544	3.34175	1.71882	0.898898	1.09476	2.08644	1.73631	2.19322
ANGEL2	19.715	23.0309	19.2657	16.5362	19.083	15.0221	18.7995	19.2283	17.6422	20.0825	18.477	20.2593	15.1011	16.4798	16.3738	18.4203	18.6034	16.7072
RPS6KC1	24.3637	26.8312	25.4787	26.8513	24.9017	28.363	25.3847	24.4383	24.5825	22.4872	22.511	24.0606	25.5368	26.8671	32.0336	22.772	24.5564	27.0927
SMYD2	26.8841	30.1737	24.6433	31.2645	38.1033	34.5453	64.7893	62.6264	57.6418	18.9126	19.6723	19.9252	20.0734	21.3738	17.8493	22.2951	22.014	21.5451
PTPN14	11.7618	8.28745	12.6871	18.1845	14.0776	19.0894	27.1903	23.6863	28.7149	11.8935	13.148	10.443	14.1189	17.5285	12.5659	17.228	21.0838	16.9007
CENPF	101.376	84.2023	124.887	11.5913	11.3246	13.7205	3.66432	2.79294	4.34433	88.129	106.579	84.2538	11.1723	15.1314	13.0895	2.56334	5.45699	5.93459
KCTD3	471.872	432.733	423.479	338.912	299.884	316.711	395.268	338.913	374.089	494.653	412.769	413.123	356.533	329.596	351.893	439.464	393.213	407.938
ESRRG	0.336051	0.274722	0.208842	0.58488	0.813372	0.542313	0.584166	1.23534	0.953633	0.649919	0.348622	0.668349	0.675252	0.79902	1.38035	0.71535	0.868157	1.16112
GPATCH2	58.865	71.3362	63.8012	48.0665	52.4938	51.1401	66.8074	62.8412	65.3768	69.8013	69.0272	69.3412	55.0637	57.0301	62.4964	83.4575	80.3045	79.6654
SPATA17	2.91245	1.92306	2.03621	1.75464	2.69038	1.78963	3.02704	2.90036	4.18539	3.63955	2.09173	2.9658	2.51685	2.74663	3.28427	4.70939	4.58883	4.12841
RRP15	70.6828	85.0723	71.4239	64.1241	64.8195	64.1556	56.4517	56.0737	57.3769	67.1366	70.2225	71.9311	62.8598	55.2323	64.3051	50.7899	47.8727	46.5736
TGFB2	2.6324	3.25088	2.14063	24.0864	38.4787	28.2003	32.7664	40.6051	31.5758	0.454943	0.647441	0.45949	1.8416	2.79657	2.09432	2.56334	2.7905	1.74167
LYPLAL1	20.2191	27.4264	21.3541	22.5976	23.5878	20.9333	18.8526	20.0877	18.4899	22.8772	20.6185	23.0998	23.7566	21.7234	26.0362	20.3279	18.3553	20.1905
BPNT1	39.318	46.3365	42.0294	46.9499	49.6157	47.4524	30.058	27.822	33.748	32.8209	39.0457	44.5288	43.9527	43.7464	54.3571	29.9851	28.4011	35.9301
IARS2	259.712	281.819	268.205	232.41	229.121	238.455	209.609	211.136	229.719	256.068	268.19	270.138	238.732	250.393	259.22	235.708	238.061	247.447
RAB3GAP2	62.0575	60.5305	60.4597	65.6129	63.3179	68.6026	68.4005	66.225	69.1913	62.2623	60.7599	62.8248	68.7529	72.5111	71.8732	63.4873	74.4135	67.1512
C1orf115	28.3963	22.2525	26.4707	25.2562	26.0279	27.0072	57.8325	56.2886	60.3437	37.1104	29.3341	28.3213	30.7546	31.012	34.3183	89.5976	88.366	92.4377
DUSP10	2.24034	1.55676	2.14063	3.66879	5.38077	5.31467	7.27552	8.37883	7.47012	0.129984	0.348622	0.167087	0.675252	0.499388	0.618776	0.417288	0.620112	0.70957
HHIPL2	0.840129	0.412083	0.783157	2.28635	1.68931	1.41001	1.22144	1.12792	1.96024	1.10486	1.74311	1.08607	1.71882	1.84773	2.28471	1.49031	2.04637	2.12871
TAF1A	5.76888	8.01273	6.83957	3.2966	3.56632	3.68773	2.60219	2.30955	3.70857	6.36921	6.12579	6.39109	3.86735	3.19608	3.14148	3.27869	2.85252	3.0318
TAF1A-AS1	2.57639	2.4725	1.93179	2.18001	2.31498	2.22348	1.54007	1.98729	2.75494	3.63955	1.39449	2.25568	1.96437	2.74663	2.5227	2.56334	3.16257	2.0642
MIA3	60.2652	47.4811	60.7208	73.4291	68.3232	74.6223	99.7331	86.9035	98.8599	55.1131	66.9355	54.011	76.2421	80.6511	75.6335	125.127	129.231	119.788
AIDA	59.7051	73.9918	71.1629	43.9192	51.1173	50.869	37.8646	39.5846	41.43	52.1235	64.7441	72.5159	44.3824	53.5843	56.6418	37.0194	37.3308	39.6069
BROX	67.0423	72.1146	65.4197	75.29	82.8388	74.6223	86.2442	80.7268	79.9992	72.9209	65.8398	67.921	80.6619	78.5037	84.5344	83.696	76.5839	78.6978
DISP1	4.76073	5.49444	5.84757	6.16783	5.6936	6.56199	7.00999	8.2177	7.73502	5.84927	6.02619	5.55565	6.44558	6.39216	6.61615	6.85544	8.8676	7.99879
TLR5	5.99292	4.16662	4.22905	3.77514	3.25349	3.85042	3.61121	4.02828	4.39731	7.53906	4.53209	6.14046	4.84953	4.39461	5.2358	5.18629	5.519	6.77317
SUSD4	31.9249	31.8678	28.9768	48.226	53.3071	44.6324	26.8185	29.5408	28.7149	35.0306	34.6132	32.2896	45.0577	45.1946	43.9331	25.9314	28.3391	28.2538
CAPN8	1.12017	1.09889	0.939789	3.50928	4.50483	2.92849	1.85871	1.45018	1.90727	1.6248	0.946261	1.00252	2.20991	2.34712	1.76113	1.13264	0.806146	0.838583
CAPN2	42.1745	32.3714	40.5153	85.233	84.7158	80.4792	43.7594	37.5973	48.3174	54.2682	38.0496	42.2313	72.1292	73.9094	71.6828	37.6751	38.0749	38.3813
TP53BP2	35.1174	32.7377	36.9128	30.1479	29.5317	33.1896	32.076	32.8708	31.258	30.1562	38.0994	34.8795	27.3784	32.2105	29.0825	24.7392	28.7732	24.3834
FBXO28	53.2081	55.5397	52.3149	75.1305	77.1452	72.9411	63.7272	63.2172	63.3636	59.3376	56.925	56.6426	80.1094	78.3539	80.3457	70.6408	63.6855	59.1524
DEGS1	47.6633	58.8821	45.632	83.2125	84.0276	77.7677	25.3847	32.7097	29.4566	54.5932	64.4453	59.9008	112.399	110.864	104.716	48.2265	45.2682	50.1215
NVL	69.4506	63.7813	61.3995	57.7968	58.1874	62.4745	45.1401	44.8482	43.0194	86.8292	71.4676	72.7248	65.4994	61.5246	69.3981	59.4933	51.5933	55.8625
CNIH4	49.5116	66.6201	46.3107	48.9704	57.374	47.6151	51.2473	53.1196	50.7015	56.6729	51.0981	57.478	53.0379	54.4332	55.1663	53.5917	47.2525	51.9276
WDR26	168.978	154.531	176.471	334.498	317.903	333.089	277.213	277.092	288.209	157.54	187.16	166.878	300.057	301.33	295.061	256.513	270.431	268.411
CNIH3	3.75257	2.88458	3.18484	3.50928	3.25349	3.30811	6.79757	5.53218	4.9271	3.2496	3.28701	3.75947	3.37626	2.49694	3.52226	5.00745	5.519	4.64446
DNAH14	10.1376	13.5987	10.1288	7.23125	7.94602	6.99584	4.24848	4.88765	4.55624	10.3987	9.4128	13.0746	7.48915	6.69179	7.7585	3.8152	4.03073	5.35403
LBR	35.6775	47.0691	43.7002	10.2088	12.4508	12.9613	10.3026	12.1386	12.0793	28.1415	33.667	36.1744	10.6813	10.2874	11.2808	7.74963	8.18548	6.96669
ENAH	159.848	149.953	179.239	173.922	167.304	193.985	177.374	177.298	205.349	137.848	166.193	151.172	136.769	155.759	152.362	134.784	150.129	151.848
SRP9	261.952	317.533	243.301	219.543	247.015	215.569	215.079	219.837	212.342	307.932	246.625	265.251	238.548	235.012	260.743	246.08	230.806	229.449
EPHX1	32.821	27.8385	31.3785	50.9378	45.9868	43.2223	38.3425	36.5768	34.3838	39.775	37.5516	34.5871	67.341	64.5209	58.4506	57.0492	63.5615	54.3789
TMEM63A	26.044	22.7104	25.6353	48.7046	47.113	52.1163	53.4247	52.6363	53.9332	27.8815	26.7941	23.2669	42.0498	41.1995	39.1257	44.769	42.2917	45.4125
PYCR2	75.2755	71.0157	76.1229	69.1222	63.5056	70.2295	64.2052	63.3246	63.9464	78.1853	71.7166	77.4032	72.0678	64.7706	65.7807	67.2429	69.7006	71.4731
SDE2	24.4197	23.3972	22.2417	20.4176	20.2092	21.5841	24.535	20.2488	21.5627	24.8919	22.5608	23.2251	20.6259	18.727	20.848	19.6721	21.5179	19.997
LINC01703	3.47253	2.15199	2.61052	1.70147	1.31391	1.35578	2.28356	1.39647	1.64237	3.31459	2.63957	2.50631	2.2713	1.59804	1.90393	2.14605	2.17039	1.74167
ACBD3	58.641	61.5378	66.5684	69.9729	70.5131	75.0019	72.8083	76.6985	74.5953	64.602	65.8896	68.4223	72.0064	78.7035	85.4387	77.0194	85.3274	80.633
LIN9	12.0418	14.2398	13.1048	4.41319	5.6936	5.47736	3.23947	4.24313	3.65559	12.7384	12.899	13.2417	4.78815	5.49326	5.99737	3.8152	3.59665	3.41884
PARP1	183.82	181.225	213.071	127.982	129.514	133.734	106.902	107.26	111.734	131.414	192.639	176.904	127.07	141.526	130.99	105.574	112.674	112.822
ITPKB	22.4594	19.8716	25.6353	21.3215	22.837	28.6341	28.4117	28.9499	32.4765	22.4872	27.1925	23.6011	24.3704	25.319	23.9895	28.6736	35.3464	40.123
PSEN2	21.0032	21.6573	21.3541	34.1889	27.1541	29.5561	30.5891	29.5945	26.2779	18.9126	22.1624	22.0555	31.123	31.7611	29.9393	26.6468	29.0213	28.1248
COQ8A	24.5878	17.5822	19.9444	14.5688	12.8888	12.9613	21.4548	17.4022	16.9535	33.0159	19.0746	19.215	16.6357	12.0852	14.6126	21.8778	17.8592	17.6102
CDC42BPA	43.5187	29.7158	43.9612	50.1934	47.9889	52.4959	56.1331	60.6391	60.3437	43.8695	38.0994	34.6706	45.426	50.6379	41.696	49.7765	55.8101	42.2517
ZNF678	15.4024	19.5053	18.2737	16.9084	14.6407	17.6252	13.0641	9.93643	11.6555	15.728	16.0864	16.5834	14.61	13.3836	17.2781	10.6706	11.6581	11.0306
SNAP47	25.5959	24.9539	24.4345	23.7674	24.714	25.4887	24.8536	23.364	28.3971	22.9421	25.9475	26.4416	25.5982	22.9219	25.465	25.0969	27.409	27.8023
JMJD4	21.3393	22.0693	19.5267	28.606	27.5921	25.9768	25.2785	24.6531	22.8872	19.1726	23.7063	23.0998	27.5012	26.7172	25.6554	22.4143	22.9442	24.8995
WNT9A	3.52854	2.88458	5.11663	3.66879	3.44119	5.2062	6.53204	6.12299	7.73502	1.29984	2.49016	3.42529	1.65744	3.29596	2.33231	2.8614	5.39498	3.22532
ARF1	484.754	479.482	483.678	536.867	551.591	529.026	519.058	534.258	519.571	455.268	491.408	491.446	560.091	562.061	543.381	566.855	555.559	575.01
C1orf35	25.876	31.4557	31.9006	18.7693	20.8974	18.7098	19.2775	21.5379	20.874	26.5817	26.0969	29.5327	20.1962	19.576	17.8493	19.0164	18.1073	19.5454
MRPL55	22.7395	25.1371	23.2859	15.8449	18.0193	16.1609	16.1973	16.4354	15.1522	22.1622	24.4036	25.2302	17.8635	17.0791	16.6594	17.9434	16.9911	18.7069
GUK1	139.573	162.132	146.555	148.666	160.922	156.457	164.31	166.825	160.687	143.112	148.015	164.873	149.722	155.559	154.218	159.344	175.678	189.907
IBA57	10.5296	6.45597	7.83157	10.5278	7.32035	9.11086	12.5861	8.11028	8.58269	10.5287	7.47048	7.85311	8.83966	9.13879	7.8537	12.6379	9.73576	9.93399
OBSCN-AS1	0.560086	0.366296	0.417684	1.2761	0.875939	1.08463	1.06212	1.12792	0.794694	0.714911	0.398426	0.334175	1.78021	1.09865	1.42795	1.07303	0.744135	1.35463
OBSCN	7.05708	3.43403	5.74315	8.61369	4.69253	8.51431	8.76249	7.03607	8.10588	7.86402	5.87678	4.92908	9.51491	5.7929	6.04497	9.77645	6.32514	5.67656
TRIM11	40.6062	33.333	41.7684	44.0255	37.9156	39.5346	49.3886	48.8228	45.2975	40.9449	40.2908	37.0934	36.8319	37.7537	31.8432	45.1267	43.8419	39.4779
RAB4A	31.1968	37.9117	29.5511	39.3997	45.4237	38.1788	50.1321	48.9302	46.834	34.7057	32.2227	33.3757	39.8398	40.3006	43.9331	51.8629	47.3146	50.315
CCSAP	19.603	23.1225	23.4947	11.1127	12.7011	13.0697	10.4619	10.9569	10.7549	14.5582	21.1664	20.2176	10.6813	12.1851	12.3755	8.64382	10.0458	9.99849
NUP133	47.9433	52.0599	51.2185	38.1767	41.2317	34.8165	39.9888	41.0348	40.2115	41.9198	45.9683	49.1237	40.0854	39.9011	38.0309	38.2116	41.1134	36.0591
ABCB10	19.435	19.3679	21.3019	15.9513	16.0797	17.4625	16.1442	17.2948	17.5362	15.4031	20.5687	18.6302	15.1011	14.7819	14.2795	15.7973	16.681	17.9328
TAF5L	34.4453	31.8678	31.4829	28.3401	25.0894	27.0072	24.3757	27.3923	28.503	23.722	30.878	30.8276	26.3962	24.5199	25.703	20.924	23.0062	21.2871
URB2	27.4442	23.214	24.9044	19.0352	17.1434	19.5233	11.4709	12.5145	13.1389	15.0781	24.2542	19.9669	14.6714	14.7819	13.0419	9.29955	13.0224	11.7402
GALNT2	100.871	91.2993	99.9309	202.315	205.908	203.422	146.095	154.364	142.515	79.8101	98.0127	86.3424	142.355	163.599	133.798	106.408	126.875	119.143
PGBD5	3.52854	2.88458	2.61052	3.66879	4.50483	3.19965	2.97394	2.90036	2.8609	2.01475	3.1874	1.87973	2.63962	3.0962	1.52314	2.50373	2.17039	2.12871
COG2	40.3262	40.0179	32.1617	38.9743	39.6049	36.6061	35.9528	38.2418	36.0791	40.8799	36.1073	38.2212	36.1567	36.0058	38.0309	40.4173	41.4235	40.51
CAPN9	1.51223	0.732592	0.835368	1.80781	1.37648	1.35578	2.44288	2.73923	2.27812	2.14473	1.29488	1.16961	1.16634	0.848959	1.18995	2.62295	1.92235	2.0642
C1orf198	45.759	44.8713	45.7886	43.3875	42.483	41.8666	40.8916	43.0758	42.5956	34.6407	41.0378	44.863	40.1468	36.2555	38.2213	32.1311	36.2766	38.0588
TTC13	12.4339	12.5456	11.3297	9.88979	11.0744	11.2259	7.22242	8.96965	10.331	9.68379	13.5465	12.2809	10.4971	12.5846	10.8524	8.1073	8.99163	12.2562
ARV1	12.4899	15.6592	11.5907	12.0698	12.5134	11.3886	11.7895	13.2665	11.8674	19.4976	12.8492	13.6176	12.7684	12.0852	14.2319	14.0089	14.3246	10.9016
FAM89A	6.44099	7.87537	5.89978	7.23125	6.81981	6.77891	8.65628	8.80852	7.99992	5.39433	6.57402	6.68349	7.7347	8.14002	7.47291	9.41878	7.99945	9.0309
C1orf131	15.4024	19.6426	16.0808	15.1537	14.3279	14.3171	13.6482	14.3407	15.1522	17.0929	19.6225	18.2961	14.0575	14.6321	15.5646	14.4262	13.7665	13.2238
GNPAT	34.2212	45.3749	33.9368	31.2113	28.9685	33.3522	28.3055	31.1521	30.9931	34.6407	33.8662	41.3123	31.0616	30.2629	34.0327	32.0119	29.3313	32.3822
EXOC8	15.2903	12.3625	15.5065	21.0025	17.5188	20.3367	22.9949	22.2361	23.8938	15.2081	15.3892	15.2467	21.6081	20.2252	22.5139	21.7586	25.9827	22.8353
SPRTN	14.7303	15.8423	14.5667	16.0045	14.7033	15.239	14.9228	16.0057	15.2051	15.5331	13.7457	15.9986	15.2852	14.2825	16.0406	14.9627	14.2626	13.1593
EGLN1	27.7803	32.1425	33.0492	34.1889	37.9782	36.7146	44.1311	47.3726	42.7545	26.0618	35.8085	31.6631	36.8933	40.0509	35.6986	42.4441	48.2447	42.8968
TSNAX	47.5513	54.8986	39.7322	48.4919	46.8627	42.7343	44.1842	41.1959	43.3903	51.1486	43.5778	50.5021	46.4082	45.3943	54.4999	50.7899	44.276	41.6711
DISC1	1.56824	1.14468	1.82737	2.9244	3.06579	3.30811	4.03606	4.24313	4.60922	1.88477	1.14547	1.58733	3.06933	2.59682	1.76113	2.20566	2.7905	2.19322
SIPA1L2	36.3496	34.1571	44.7444	24.565	22.399	29.7187	32.076	30.615	31.4699	30.2212	38.6971	33.6263	17.9249	18.9268	19.7056	19.3145	24.8045	22.4482
MAP10	6.16094	5.08236	4.59452	6.91222	5.19307	5.31467	8.12522	6.28412	6.46351	7.53906	4.98032	5.97337	6.62974	5.94271	6.14016	8.70343	5.82905	8.12781
NTPCR	28.6204	43.0398	28.9246	24.884	26.3407	22.6145	20.4989	20.034	21.0329	34.0558	29.0353	33.9187	24.5546	24.1704	27.7497	24.1431	25.9207	27.1572
PCNX2	8.40129	6.27282	7.04841	13.984	13.3894	13.829	14.3917	13.3202	13.8807	8.38396	8.21753	7.31007	11.2337	11.4859	10.0908	9.89568	9.54973	8.90188
MAP3K21	18.4828	16.4375	19.0568	13.2396	15.1412	15.2932	14.8166	16.704	17.3773	11.9585	18.477	17.6695	13.1367	13.883	13.0895	14.1282	14.3246	12.0627
KCNK1	26.324	32.3714	26.9928	38.4426	41.6071	37.5281	29.5269	33.5153	31.9997	26.3867	26.3459	28.0707	38.7349	39.6514	38.0309	26.8852	28.2151	28.7699
COA6	16.9146	26.7854	16.3419	14.6752	16.5803	14.2086	12.9048	11.9237	13.7747	19.2376	16.8833	21.1783	16.4516	14.4323	18.5157	14.3666	12.5883	14.8365
TARBP1	20.4991	22.0236	26.3141	20.0454	19.9589	19.5775	16.7815	18.369	18.3839	14.9481	18.726	18.9644	16.1447	16.0303	18.2301	15.6185	18.6654	14.3849
IRF2BP2	170.098	163.322	189.681	187.693	206.972	223.867	261.866	273.494	269.189	191.011	163.703	154.18	155.922	173.238	158.312	163.338	174.128	175.07
LINC01132	1.51223	0.869954	1.61852	1.6483	1.75188	1.8981	1.06212	1.07421	1.11257	1.55981	0.846654	0.668349	1.16634	0.998775	1.23755	0.655738	0.868157	0.645064
LINC01348	0.616094	0.549444	0.991999	1.2761	0.688238	1.35578	1.91182	1.28905	0.953633	0.584927	0.298819	0.501262	0.552479	0.449449	0.52358	0.536513	0.744135	0.90309
TOMM20	195.414	210.483	172.869	202.741	213.667	181.024	246.571	220.052	211.177	222.467	167.239	179.034	197.296	181.677	198.294	217.288	199.118	202.292
ARID4B	43.7987	38.5069	45.4753	47.907	46.7376	46.5305	51.8846	49.897	54.2511	42.5697	46.4664	40.6858	48.6181	46.9424	51.1204	54.4262	50.4771	47.0252
GGPS1	15.1783	17.3533	16.3419	17.6527	16.1423	18.3302	16.1442	15.6835	16.6886	17.8078	17.6303	18.0037	17.9249	18.6771	22.3235	23.5469	20.0916	20.9001
LYST	4.20064	3.70875	5.37768	9.83662	8.44655	11.497	8.8687	9.45304	10.49	4.8094	4.78111	4.26073	8.77827	9.788	7.04453	8.40537	10.4179	6.51515
GPR137B	33.3251	28.8458	27.4105	55.4573	55.5595	48.3743	72.0118	66.4398	62.304	37.6303	34.9618	28.0707	60.0974	55.5818	52.7388	71.3562	64.1816	63.9258
ERO1B	2.80043	2.38093	2.14063	4.62587	3.56632	4.3385	4.77954	3.27634	4.39731	4.54943	3.83485	2.92403	5.34063	4.894	5.2358	8.40537	5.89107	6.51515
EDARADD	1.79227	0.824167	0.522105	1.32927	0.938506	1.08463	2.70841	1.93358	1.32449	1.81977	0.647441	1.12784	1.47328	1.74786	1.47554	3.57675	3.28659	3.0318
LGALS8	89.1657	79.1658	69.3877	102.301	98.5431	92.5186	153.529	132.128	137.8	111.071	76.8961	79.4918	121.791	102.474	111.618	189.687	147.463	145.591
LGALS8-AS1	0.504077	0.503657	0.365473	1.16976	1.25134	1.30155	1.00901	1.39647	1.05959	1.23485	0.796851	0.877209	0.920798	0.499388	1.04716	1.49031	1.6743	1.22562
HEATR1	59.2571	57.7832	57.3793	40.9416	43.0461	39.4262	36.4838	37.0065	41.483	45.1694	55.8792	55.3895	37.9983	38.2531	38.6021	31.5946	34.1682	30.447
MTR	47.6073	35.9428	45.2665	39.506	31.3461	33.298	34.3596	31.7966	31.3109	37.7603	37.9002	35.9238	36.0339	32.8597	29.1777	30.462	28.9592	26.0606
FH	58.697	67.3527	60.1465	36.2626	39.7301	39.3177	30.1111	32.4411	29.5626	55.7631	58.9172	64.997	41.6201	45.3444	44.5995	38.6289	41.4235	41.6066
OPN3	5.37682	6.08967	4.43789	12.3357	16.8305	14.9678	9.39976	10.2587	8.52971	4.41945	5.32894	4.72022	8.04163	11.6357	9.18645	6.49776	8.8676	7.80527
CHML	29.9086	29.7616	34.981	35.8372	36.6643	38.0161	23.048	22.9344	26.1719	25.4768	33.7168	34.0023	32.7804	35.6063	39.0305	19.9106	22.9442	23.8029
EXO1	28.0603	32.2341	30.4909	3.03074	2.94065	3.25388	0.637272	0.537105	1.05959	20.7974	30.0811	28.4048	3.25349	3.29596	3.85545	0.536513	1.55028	1.29013
ZBTB18	2.07232	2.51829	2.55831	2.5522	3.19092	2.27771	2.44288	3.33005	3.33771	2.53468	2.83878	2.88226	2.70101	3.14614	3.09388	2.50373	3.41062	2.58026
DESI2	32.0369	41.6662	37.9048	26.426	29.4691	26.953	26.2875	30.0241	25.96	32.301	39.0955	38.0124	25.2299	29.7635	31.0816	25.3353	29.3933	29.7374
COX20	37.1337	54.1203	40.8808	25.3094	30.4702	30.5865	18.7464	19.1746	21.0859	47.7691	39.6931	46.325	29.4655	28.6648	36.127	21.1624	20.6497	26.6411
HNRNPU	599.292	469.409	657.278	479.761	484.144	518.56	475.033	485.704	492.975	536.768	630.259	503.81	467.949	494.993	434.476	426.587	480.959	429.29
EFCAB2	2.80043	3.93768	3.91579	3.03074	2.62782	2.98272	3.45189	4.6191	3.07282	2.72966	2.73918	4.8873	3.80596	3.59559	4.52183	4.53055	4.09274	4.77347
SMYD3	19.0989	21.5657	17.0206	27.8084	26.7161	25.0549	22.6763	23.8474	20.3971	26.2567	19.1742	20.3429	27.1328	24.8695	28.0829	22.9508	21.3319	18.9004
TFB2M	22.7395	21.932	14.3057	14.3562	17.1434	14.1001	17.3126	14.2333	14.9932	21.5773	14.941	16.834	15.7763	13.1339	16.7546	19.1356	18.1073	17.6748
CNST	16.5225	17.3533	16.133	15.5791	14.7033	15.3475	21.8266	20.7859	22.4104	18.1327	16.7837	17.5859	18.7229	15.8306	18.9441	21.8778	21.2078	20.513
SCCPDH	34.1092	37.1333	32.736	58.169	66.5713	55.2617	81.0929	87.8166	74.9661	35.8755	33.5175	31.9555	52.7924	57.5295	55.6423	67.7794	69.4526	60.5715
AHCTF1	84.5729	77.1969	88.3923	71.6212	66.3211	68.223	63.2493	65.2045	65.8006	63.6921	91.1398	77.9045	67.0341	66.7182	62.8296	57.8838	64.0576	55.54
ZNF695	9.46545	16.1628	11.0686	2.44586	3.62889	3.85042	0.849696	0.913078	1.16555	9.74879	10.4587	12.9493	2.82378	3.9951	3.04628	0.834575	1.1162	1.48365
ZNF670	6.04893	8.33324	6.63073	5.10441	5.6936	4.77235	4.67333	5.6396	4.02645	6.36921	6.47441	7.81133	4.72676	5.49326	5.47379	5.12668	4.89889	5.41854
ZNF669	5.76888	7.92116	7.4661	4.46636	4.62996	3.79619	7.75348	6.39154	5.40392	5.71929	6.12579	7.05944	4.41983	4.99388	4.99781	4.53055	4.4028	4.45094
ZNF124	5.71287	5.90653	5.11663	5.42344	5.44333	3.90465	4.67333	4.99507	5.50988	4.61443	5.62776	6.01514	4.72676	4.74418	4.52183	4.94784	3.59665	2.58026
ZNF496	42.2305	35.4392	36.5473	29.2972	25.9028	23.3195	37.6522	38.403	33.801	38.1503	34.9618	37.9288	25.9665	23.5212	22.4663	37.2578	29.0833	30.8986
SH3BP5L	29.9646	26.6023	30.8042	25.8942	24.8391	25.7599	35.1031	36.0397	38.1983	32.106	28.836	30.0757	25.0457	22.3226	25.4174	30.7601	33.424	31.7371
ZNF672	12.7139	13.2325	14.7756	9.73028	12.9514	12.5274	10.0901	11.7626	12.1323	11.5686	13.8951	13.7012	12.4615	11.3361	10.8048	12.2206	12.5883	13.9334
ZNF692	14.0021	15.8881	19.0046	16.3235	16.1423	12.202	7.9128	10.581	9.90718	14.8182	15.5386	18.0037	16.0833	12.7843	16.0882	12.3398	8.68157	10.9661
PGBD2	9.01738	9.61528	8.9802	8.66686	9.25992	8.56854	10.5681	11.0106	9.96016	9.03388	9.56221	8.81386	8.10302	8.68934	8.85326	13.0551	9.85978	9.54695
FAM110C	33.6612	30.7231	30.3865	42.5367	51.6804	47.5066	76.0478	79.6526	71.9993	38.5402	34.1152	31.7884	39.4715	43.9461	37.4598	65.0969	66.7241	63.7968
SH3YL1	47.9433	56.5928	42.3949	103.524	126.073	94.0913	139.403	149.798	123.019	63.0422	57.8713	50.2515	124.615	121.151	123.47	174.247	151.369	139.269
ACP1	184.828	203.294	162.218	174.613	191.267	161.718	175.037	177.083	165.084	215.968	186.413	187.639	189.193	182.776	190.107	198.927	183.367	180.36
TMEM18	73.9873	77.7464	65.9418	59.2324	60.4398	50.869	62.8775	57.9536	53.4564	90.2088	64.0967	70.7197	69.6123	58.8778	62.8772	75.7079	61.0811	65.087
PXDN	329.722	235.574	348.662	592.75	541.268	613.302	641.202	643.559	665.9	250.089	329.647	267.465	455.488	521.411	395.16	452.459	547.869	484.443
EIPR1	78.9721	81.1346	74.7132	73.3759	77.1452	71.6395	61.9216	64.5063	66.8073	71.2961	75.0036	80.4943	72.5589	75.008	71.0641	62.9508	62.7554	69.7959
RNASEH1	92.4141	92.7187	93.1435	75.8217	69.3869	75.5442	68.8254	66.3324	68.3966	83.0597	88.8489	84.2538	67.8321	67.9667	69.9693	65.0969	63.8716	63.9258
RPS7	501.893	625.863	470.364	507.251	595.701	500.826	528.723	530.283	509.929	601.63	483.041	496.709	578.261	510.474	532.433	564.948	523.685	533.081
SOX11	17.4747	13.0493	18.0126	8.98589	9.19736	11.6055	16.4098	17.8856	16.7945	13.3883	15.5386	12.5316	6.93668	8.63941	7.61571	8.34575	10.2939	10.45
RNF144A	3.9206	3.98347	4.59452	1.75464	2.12728	2.38618	6.05409	5.53218	6.56947	4.8094	5.52815	5.13794	2.20991	3.0962	2.6179	3.69598	4.9609	3.87038
LINC01814	1.17618	0.549444	1.09642	1.22293	0.563104	0.813469	2.01803	1.98729	1.80131	1.75478	0.996064	0.584806	1.41189	0.749081	1.23755	2.80179	2.41844	1.9997
ID2-AS1	3.58455	3.34245	2.14063	2.12684	1.93958	2.33195	3.87674	4.88765	6.14563	4.41945	4.08386	3.92655	3.31487	2.99633	2.4751	5.54396	5.14693	6.64416
ID2	70.5708	86.4917	68.6568	39.3465	40.1055	45.0662	90.9175	94.6915	99.0718	116.79	87.0062	90.6449	58.9924	66.1689	71.0165	175.738	142.316	186.488
KIDINS220	106.472	84.2481	107.762	122.931	105.363	118.17	137.651	127.562	133.138	85.3994	95.7715	91.7727	110.68	103.973	108.476	103.07	107.775	101.404
MBOAT2	61.6654	69.8252	67.978	68.6968	75.9564	72.1819	82.633	85.5608	86.4627	60.5725	74.8542	68.0045	70.9014	77.0555	77.4422	87.2131	86.0096	86.5676
ASAP2	147.247	115.566	141.49	136.968	127.512	140.893	151.618	151.088	145.853	128.879	134.668	119.467	105.769	112.862	108.429	112.847	111.806	105.661
ITGB1BP1	75.4996	110.53	88.6534	58.5944	70.0751	65.2402	58.4697	64.3451	58.1716	67.3316	79.1373	94.6132	60.2202	59.6768	67.9702	59.076	61.3291	59.6039
CPSF3	112.129	141.573	113.14	76.5661	82.088	79.7742	61.2312	67.514	65.3768	104.442	113.601	120.261	78.8817	76.656	82.9636	63.2489	60.2749	62.6357
IAH1	51.976	70.3289	53.7768	45.9397	51.8681	47.127	50.5038	52.3677	50.1187	64.8619	51.9447	57.478	50.8894	50.4881	53.072	51.3264	48.0587	53.0888
ADAM17	80.1483	88.2774	83.7456	70.6642	75.143	72.7784	76.3664	74.1741	76.2376	84.3595	77.444	85.2981	70.2876	77.2053	74.2531	63.7258	72.6151	71.9246
YWHAQ	623.711	756.951	593.215	434.566	492.403	427.071	464.518	458.365	436.128	592.921	615.866	625.867	441.983	462.683	458.418	451.923	425.831	433.547
TAF1B	56.2326	57.4627	52.576	41.7392	36.9771	38.9381	37.0149	36.4694	39.8406	50.6937	50.9985	52.8831	40.0854	35.4565	41.7436	39.2847	34.1062	34.5109
GRHL1	44.5828	48.3053	50.592	46.2587	44.1723	46.3135	31.545	31.0984	35.7082	49.4588	54.3851	55.2641	48.0656	53.0849	50.4541	27.7794	32.5559	32.1242
KLF11	50.9678	39.4226	42.0294	20.0454	17.3936	18.3302	35.4217	30.4538	31.3109	42.6997	32.5215	37.0934	16.9427	14.2325	14.4698	22.2355	16.371	17.8038
RRM2	414.015	543.584	489.056	44.9826	52.1184	60.5764	4.72644	4.94136	11.4436	392.746	477.164	483.467	44.5666	76.2065	74.0152	9.538	24.6185	28.0603
HPCAL1	126.803	117.306	133.659	118.039	119.941	137.422	148.803	151.839	142.25	100.867	113.402	128.95	80.1708	87.6425	77.7754	92.459	95.7453	97.2756
ODC1	135.765	158.469	138.306	121.708	123.945	117.682	108.655	107.689	97.3765	182.627	175.407	164.33	121.975	133.137	137.511	107.124	113.791	105.339
NOL10	68.4985	81.7756	75.1309	65.3471	65.8831	61.7152	58.098	58.0073	60.5557	66.0968	72.8621	75.9412	63.2895	62.3236	69.4457	54.1878	53.5777	58.8298
RN7SL832P	3.2485	2.8388	2.87158	1.86098	1.31391	1.41001	2.28356	1.71873	1.32449	4.09449	2.88858	2.84048	1.90298	2.49694	2.37991	2.74218	1.98436	1.41914
ATP6V1C2	1.62425	1.23625	1.35747	2.07367	2.31498	1.57271	2.01803	2.20213	2.49004	1.42982	1.4941	1.37847	1.3505	1.64798	1.52314	1.84799	1.79833	2.45124
PDIA6	657.989	761.301	697.219	589.666	654.827	637.326	542.053	519.112	550.564	690.799	716.469	738.818	614.479	654.098	683.462	621.639	635.677	657.191
KCNF1	9.57747	8.74532	11.8518	38.4426	33.5985	36.2265	6.31962	5.85444	4.98008	8.77391	7.52028	8.22905	19.5209	19.1265	17.6113	5.54396	4.58883	3.41884
C2orf50	0.896137	1.14468	0.991999	1.06342	1.37648	1.30155	0.53106	0.161131	0.211918	0.974879	0.597638	0.877209	0.613865	0.79902	0.761571	0.23845	0.310056	0.451545
SLC66A3	68.1624	87.9569	68.9178	87.6789	98.1677	93.6574	92.1389	100.868	100.714	70.3212	73.0613	81.0791	79.3114	88.1419	91.7693	86.0209	100.644	99.0173
ROCK2	131.116	124.449	157.154	108.043	112.683	128.04	127.401	134.276	145.217	108.277	143.035	132.918	97.8501	111.963	112.95	126.438	135.433	130.367
E2F6	151.335	153.89	143.527	55.2978	47.9264	48.2116	53.0529	50.2193	48.2644	139.603	126.749	150.629	58.7469	52.186	57.451	52.161	46.5704	45.7995
GREB1	481.562	401.186	617.441	68.112	36.3515	54.1228	14.4979	13.911	11.9734	442.075	419.642	459.198	109.575	62.6232	85.8195	12.5186	11.5341	11.9982
LPIN1	41.5584	37.5912	53.7246	30.9987	29.4691	36.8773	37.4397	37.3288	39.7877	24.372	37.8006	37.5947	21.5467	23.4712	25.1318	28.5544	31.5017	31.9952
TRIB2	7.22511	5.81495	5.79536	3.93465	3.81659	4.01312	6.31962	7.6806	8.31779	4.35446	4.7313	6.64172	5.03369	3.44577	3.52226	7.1535	4.46481	4.83798
LRATD1	16.0185	14.7434	18.2215	13.3459	10.5738	13.1782	23.9508	25.2976	28.3971	13.9083	16.3852	14.9961	17.6179	15.1814	15.5646	29.3294	32.1838	31.8017
NBAS	59.2011	57.9206	67.3515	65.932	66.2585	73.3749	71.9587	70.3607	79.8932	62.0023	63.5489	64.1198	73.1113	76.656	69.8265	71.8331	85.6375	79.7944
DDX1	215.129	261.673	226.228	202.9	222.426	205.862	198.616	197.225	196.236	224.352	233.826	228.659	221.114	227.321	251.556	218.54	206.249	212.936
MYCN	1.9603	2.01463	1.46189	0.319026	0.0625671	0.108463	0.424848	0.751946	0.529796	1.88477	1.29488	1.46201	0.0613865	0.199755	0.190393	0.4769	0.744135	0.70957
SMC6	63.4017	73.4882	71.8416	30.5733	33.4108	32.8099	28.6241	26.8552	29.8805	56.023	64.2461	62.1983	27.5012	30.2629	31.6528	27.0641	26.5408	26.2541
GEN1	36.5176	50.961	51.1141	22.9167	21.961	22.1806	17.047	14.7704	15.7879	32.236	46.7154	48.9566	20.3803	24.5699	23.8943	15.6185	17.4252	14.0624
KCNS3	15.7384	20.7873	16.2375	7.17808	8.13372	7.05007	8.07211	8.16399	7.68204	12.4784	22.7601	20.3429	7.98025	10.6869	9.04365	7.1535	9.23967	8.70836
RDH14	26.436	26.9686	25.2177	31.6899	32.1595	28.0918	31.6512	31.7966	26.1189	25.2819	26.6447	27.653	36.525	30.4127	29.4157	33.9195	34.4782	32.7047
LINC01376	1.84828	1.14468	1.72295	2.0205	1.50161	1.51848	3.02704	2.30955	3.1258	3.1846	1.44429	1.54556	3.00794	2.29718	2.6655	2.80179	3.53464	3.0318
TTC32	5.99292	6.59333	5.69094	3.34977	2.81552	3.52503	3.29257	2.52439	3.28473	8.12399	5.52815	5.97337	4.17428	3.69547	4.23624	4.64978	3.78268	4.51545
WDR35	24.9798	18.2232	21.4585	27.2767	21.8985	22.6687	24.7474	20.4637	24.7415	25.0219	17.3813	19.591	29.0972	24.2702	25.703	22.4143	22.6961	18.3843
MATN3	4.5927	3.47981	3.08042	13.3991	11.7626	9.8701	11.0992	12.2997	9.74824	4.93939	3.23721	2.79871	9.45352	9.13879	7.42531	5.00745	6.01509	4.90249
LAPTM4A	330.787	346.058	273.531	440.308	475.822	419.045	396.436	384.674	375.572	377.798	310.971	318.176	485.567	454.343	459.894	367.452	364.502	356.785
SDC1	173.963	184.43	179.447	310.518	341.866	320.344	269.46	280.369	286.355	159.36	196.623	191.273	276.73	300.282	260.172	195.589	222.062	219.709
PUM2	265.593	273.44	285.382	222.893	236.691	241.275	282.152	289.875	284.288	266.987	273.818	267.674	223.999	233.863	238.943	254.963	277.004	268.089
RHOB	617.215	624.031	617.076	630.076	756.436	788.089	1102.59	1130.66	1117.5	510.966	605.109	573.694	480.288	576.743	563.61	845.604	960.492	968.306
HS1BP3	63.2897	65.4755	68.6568	61.4656	66.5713	66.7045	79.4997	79.3841	80.3171	56.413	57.9709	63.4514	59.2994	58.0288	56.975	61.4605	65.6079	67.9252
LDAH	33.4931	38.049	28.7158	31.424	32.7851	29.8814	32.9257	32.28	30.5692	34.3807	29.8819	32.8327	32.9032	32.7598	34.8895	32.4888	32.7419	31.3501
KLHL29	4.25665	2.38093	3.70694	4.14733	5.19307	4.55543	5.73545	4.56539	4.23837	2.92464	3.48622	3.38352	5.21785	4.69424	3.71266	5.78241	5.64302	4.32193
ATAD2B	45.2549	45.8786	51.5317	47.1626	38.6664	47.5608	39.8826	42.9684	43.6022	45.8193	53.0902	49.4996	44.3824	47.7415	45.6466	41.6095	40.8034	41.4776
UBXN2A	69.1706	78.7079	70.7974	50.9909	50.3039	53.2009	51.9908	49.6822	54.463	57.2579	63.8477	71.4716	51.135	51.6866	52.6436	44.7094	46.2604	45.348
WDCP	15.5144	21.1994	18.2215	10.4215	11.1369	11.9851	6.26651	6.87494	7.04628	11.2436	17.0327	16.4999	9.94462	9.98775	9.37684	5.18629	7.56537	5.93459
SF3B6	124.003	154.76	121.024	109.16	121.943	106.836	108.018	108.979	108.025	140.058	120.026	129.451	115.775	104.722	118.567	112.37	105.419	109.919
FAM228B	5.37682	4.12083	4.07242	6.54002	5.1305	4.17581	4.83265	5.37105	6.03967	5.19935	4.58189	4.34427	5.4634	4.84406	5.94977	6.1997	5.45699	4.64446
TP53I3	9.46545	9.47792	11.4341	8.08198	10.9492	10.6836	8.49696	10.9032	11.7615	10.5937	10.3591	12.1974	9.14659	10.3373	12.0899	9.77645	12.1542	13.0303
PFN4	1.23219	1.51097	1.25305	1.16976	1.25134	1.24732	0.424848	0.644526	0.582775	1.36483	1.24508	1.25316	0.798025	1.49816	0.904365	0.834575	0.992179	0.774077
ITSN2	59.7612	64.0103	65.5242	64.071	62.8799	66.3249	69.4627	65.7953	72.8469	55.8281	66.9853	60.4438	59.6063	64.6208	65.3999	65.7526	66.352	62.8292
NCOA1	96.3348	68.6805	101.706	108.628	93.9132	111.174	144.661	142.87	152.634	81.1099	105.085	88.0133	106.567	120.502	110.713	161.669	167.802	169.2
PTRHD1	30.4687	36.4465	30.2299	33.0191	41.1066	36.5519	39.7233	40.8199	35.1255	35.4856	29.9317	32.958	36.6477	35.6563	37.9833	42.5633	41.2375	43.6708
CENPO	78.132	81.9588	89.6454	30.0947	29.0937	32.7015	26.7654	25.0291	26.8077	57.5178	79.9341	77.5285	28.6061	32.3104	30.9864	27.0045	25.1145	24.706
ADCY3	112.633	97.4806	109.224	71.6212	61.5034	69.0907	55.124	52.2066	52.5557	85.2694	105.533	96.117	63.2895	63.1226	52.5484	44.1133	43.966	39.865
DNAJC27	13.05	13.0035	13.7314	12.2825	11.5123	14.9678	14.9759	12.7831	13.5628	12.2835	11.4547	12.991	12.5228	13.3836	12.9943	12.2206	12.1542	10.8371
DNAJC27-AS1	2.74442	2.38093	2.61052	2.97757	2.87808	2.49464	2.97394	2.84665	4.45029	5.13436	1.94232	2.9658	2.2713	3.14614	3.90305	3.99404	3.47263	4.90249
EFR3B	98.2951	73.8545	93.0391	130.481	112.746	134.819	191.129	183.314	180.237	67.9815	90.4426	75.9412	90.054	104.072	87.7234	166.2	176.05	164.104
DNMT3A	42.3985	33.1956	43.5435	43.228	38.1033	42.5173	48.6982	49.897	43.1784	45.2344	38.2488	35.5896	41.7428	38.2531	37.2218	45.9613	38.881	36.2526
DTNB	39.7661	39.0105	37.3305	46.6309	41.6697	40.6192	41.4227	37.651	39.7347	45.2994	44.2252	44.9047	47.8815	48.5904	45.0755	41.3115	44.462	48.3153
ASXL2	100.815	72.3435	103.22	95.7608	79.9607	101.304	107.646	100.116	112.688	80.7849	109.866	85.2981	95.8857	104.022	87.0571	94.2474	112.302	95.792
KIF3C	50.6318	38.7816	52.3671	58.1158	57.1863	60.6848	88.8995	76.2689	76.8734	31.1311	42.1833	41.1035	41.8656	42.398	33.1283	44.5306	44.8961	43.1548
RAB10	314.992	353.064	325.532	338.858	387.791	380.921	338.285	363.029	371.599	372.014	336.172	348.335	360.277	382.481	411.915	343.368	377.152	394.521
HADHA	399.341	378.247	384.217	460.248	455.613	453.862	442.692	430.65	438.936	410.034	390.606	377.826	468.993	491.997	480.646	458.838	488.772	474.122
HADHB	161.361	170.923	151.671	241.13	240.508	224.355	262.981	252.063	253.772	191.726	159.47	165.542	263.41	244.3	260.79	314.158	286.864	292.472
SELENOI	141.478	177.425	167.857	162.171	181.257	192.141	111.629	123.856	126.038	121.405	172.319	164.832	168.997	195.86	196.009	107.601	134.812	130.754
SLC35F6	77.0678	72.5267	81.0307	105.438	114.373	114.916	113.859	111.718	111.257	70.1263	83.0717	79.2412	91.4659	102.125	85.2483	92.6379	100.148	106.5
CENPA	40.6622	58.699	46.4673	2.23318	3.50376	5.42313	0.53106	0.429684	1.32449	44.4545	47.2632	49.0401	2.88517	5.5432	4.09344	0.774963	1.48827	2.25772
DPYSL5	11.9858	11.2636	12.7916	3.40294	4.5674	5.42313	3.61121	3.81344	3.33771	4.09449	12.7496	11.2366	3.31487	3.44577	3.18908	2.3845	3.10056	3.67686
MAPRE3	26.436	24.7708	29.6556	55.6168	54.7462	55.3702	48.4327	49.8433	42.3837	23.5271	29.8321	28.6137	52.9766	48.7902	48.4549	43.696	45.4542	43.2838
TMEM214	161.865	142.672	168.901	194.925	196.21	198.812	176.206	182.401	173.826	140.642	184.172	172.768	203.496	227.371	203.815	209.776	228.077	220.999
AGBL5	96.2227	91.2993	92.6214	79.5969	76.019	80.6962	84.3855	85.7756	85.3501	106.002	89.8948	103.218	86.6778	80.8009	90.2461	91.6244	84.9554	97.1466
OST4	130.276	156.363	127.341	160.895	180.944	165.405	163.035	170.262	162.065	143.177	139.2	148.541	181.459	173.138	173.305	179.732	172.577	197.261
EMILIN1	1.34421	1.28204	1.61852	0.58488	0.500536	1.19309	1.11523	0.966788	0.741714	2.46969	1.14547	1.71265	0.675252	0.549326	0.761571	1.31148	0.682123	1.09661
KHK	14.5622	15.2471	12.8438	4.41319	5.25563	4.3385	2.60219	2.63181	3.28473	10.7887	14.2437	13.9936	3.06933	3.84528	3.23668	2.44411	2.7905	3.22532
CGREF1	58.921	52.9298	57.9536	62.2632	59.4387	66.9756	52.575	48.3394	51.4432	53.0334	49.2554	50.5857	53.2835	53.5344	56.5466	43.0402	44.4	50.702
PREB	131.788	166.07	157.154	133.991	137.585	145.231	113.434	127.24	127.469	116.271	155.037	166.252	128.298	136.882	147.888	116.721	133.882	131.335
SLC5A6	149.487	151.189	153.238	154.674	164.739	185.525	228.515	253.567	271.255	88.324	130.484	133.545	99.3848	113.96	106.334	108.256	137.727	147.591
ATRAID	162.537	193.862	155.587	143.083	143.466	143.876	143.068	144.374	138.383	183.082	153.942	175.191	153.282	151.314	157.883	155.946	148.517	164.491
CAD	125.403	98.7626	157.884	84.4354	75.4559	97.8875	88.5277	92.5431	102.251	85.7893	138.353	106.769	67.7707	81.7997	57.0702	52.161	79.1883	57.2172
SLC30A3	8.56931	7.14278	10.0244	8.45418	8.69682	8.35162	6.05409	6.76752	7.73502	8.059	8.86497	8.98094	8.59411	7.9902	6.75894	5.00745	5.76704	5.80558
TRIM54	4.87275	2.51829	3.39368	2.81806	2.69038	2.49464	2.81462	3.43747	2.75494	7.14911	3.93445	4.63667	3.74458	2.99633	3.61746	3.39791	2.54246	3.28983
UCN	0.78412	1.19046	1.25305	1.16976	1.62674	1.24732	0.849696	1.18163	1.85429	1.75478	1.79291	1.46201	0.982184	1.24847	0.951963	1.31148	0.868157	1.35463
MPV17	92.6942	104.898	92.517	109.798	119.503	112.15	86.6159	90.5558	86.4627	94.4332	87.4544	99.96	110.803	113.161	115.616	83.7556	79.4364	93.3408
GTF3C2	154.976	139.605	154.021	143.455	140.275	144.255	134.093	129.174	124.29	133.428	147.318	144.155	141.005	137.631	135.845	124.411	115.899	119.853
EIF2B4	54.3283	62.774	62.1305	48.3855	54.9964	58.6783	58.6821	66.2787	66.8073	52.5135	64.4951	70.8033	54.8182	61.974	62.544	65.3353	63.0034	69.7959
SNX17	148.423	166.161	147.808	153.77	161.611	158.464	142.908	151.947	134.038	161.765	145.176	156.352	156.351	158.106	155.36	142.772	149.633	160.427
ZNF513	1.62425	2.19778	2.24505	2.9244	2.00215	2.82003	2.97394	2.73923	3.33771	2.07974	2.63957	2.13036	1.71882	2.04749	1.71353	3.21908	1.86034	1.74167
PPM1G	322.441	327.286	339.368	304.457	309.957	316.44	414.599	370.656	378.486	244.695	334.379	311.409	270.162	280.606	267.692	362.563	325.931	305.309
NRBP1	301.662	293.083	301.829	369.91	387.04	388.079	640.459	571.479	572.762	299.808	303.252	298.836	340.757	359.559	336.662	569.955	524.553	498.763
KRTCAP3	0.504077	0.869954	1.14863	1.32927	0.813372	0.705007	1.38076	1.23534	1.53641	0.714911	0.697245	1.3367	0.429706	0.499388	0.333187	0.834575	1.05419	0.90309
IFT172	24.6438	19.8258	25.0088	20.6303	19.0204	22.2348	24.6412	22.7195	28.0262	27.2966	24.4534	20.3429	23.7566	21.6235	19.7056	19.2548	24.9285	22.6417
ZNF512	6.04893	5.86074	5.89978	6.96539	5.56847	6.2366	8.70939	7.84173	7.89396	11.5036	5.52815	6.64172	7.61193	6.34222	7.33012	5.48435	6.75922	6.12811
CCDC121	10.0255	11.6757	10.7554	7.39076	9.07222	9.00239	9.18734	8.91594	10.6489	10.5287	11.6539	10.61	7.24361	9.18873	8.99605	8.70343	9.92179	8.51484
GPN1	78.7481	106.455	79.7776	68.2715	73.704	72.5072	68.9847	68.3197	65.3238	77.9253	81.229	88.3892	70.5945	69.4149	79.9173	65.8718	68.1503	71.2796
SUPT7L	51.9199	50.4573	52.4193	52.0543	49.8034	50.0013	44.7153	46.8892	49.5889	55.8281	47.0142	52.8414	53.4063	46.2932	54.5951	52.6379	48.7408	51.6696
SLC4A1AP	56.6807	63.5066	60.8774	45.3016	48.3018	49.7301	52.8405	49.3062	48.9531	54.2682	61.5567	58.1464	48.3112	47.6416	51.4536	56.2146	49.981	48.0573
MRPL33	46.2631	61.3088	49.0779	45.2485	52.3061	44.795	41.1041	38.6178	39.7877	49.0039	43.03	48.6642	47.1448	42.7476	51.8344	47.5112	40.2453	44.7674
RBKS	8.84935	8.97426	7.57052	10.1025	11.7626	9.97856	13.011	14.0184	12.7151	12.7384	9.363	9.39866	10.9882	11.2862	12.4707	15.1416	14.0765	17.6748
BABAM2	36.9657	34.2029	40.8286	46.6309	46.0494	43.9273	42.591	38.7252	41.8539	40.8149	40.3406	40.3516	50.4597	49.9388	47.6934	46.4382	41.4235	47.6057
FOSL2	76.0036	58.699	77.2193	237.196	236.941	247.837	105.469	114.726	103.151	72.9859	70.9197	58.8565	221.053	220.03	193.153	67.7794	73.1732	62.4422
PPP1CB	297.518	345.967	306.267	265.855	302.199	280.538	316.618	317.59	328.579	340.298	296.678	315.544	276.669	280.206	324.477	313.443	319.172	312.727
TRMT61B	22.1234	29.1206	23.7036	18.7162	18.3947	17.2998	19.7023	18.8524	18.6488	19.1076	19.2738	24.5618	18.6615	17.0791	20.848	17.9434	16.619	19.1584
WDR43	160.689	167.214	149.322	131.385	129.702	123.214	102.813	99.4181	97.4295	147.337	146.073	150.17	118.292	110.764	117.52	91.9821	96.3654	85.729
CLIP4	3.36051	1.96884	1.93179	7.17808	9.94816	8.24316	27.2965	23.1492	17.4833	3.44457	2.49016	2.42277	5.27924	7.89032	4.75982	14.4858	16.309	8.25682
YPEL5	87.9335	97.4806	65.8374	181.845	183.572	161.88	238.605	234.715	208.316	113.151	80.6812	81.831	183.975	168.893	170.592	232.608	198.374	192.939
LCLAT1	42.9026	40.6589	44.4833	37.2197	35.5381	36.1723	34.7844	32.6022	34.4897	47.4441	48.0601	42.5237	38.121	39.6014	38.3165	38.2712	39.3151	41.8001
CAPN13	6.38498	5.17393	4.28126	28.9782	31.5964	19.9571	52.4156	46.5133	33.1122	7.86402	5.07993	3.84301	23.5724	19.5261	15.2314	38.2712	28.3391	22.7708
GALNT14	41.5584	45.3749	44.7966	32.0089	32.7851	36.4977	41.7413	39.2086	42.0658	45.1044	48.8071	47.4528	33.7012	38.7525	39.3637	56.4531	55.9961	60.636
EHD3	14.5062	13.1409	15.3499	20.3645	21.2728	25.6514	32.554	29.3259	32.2116	15.4681	18.477	16.834	19.5823	21.2739	22.0856	31.1773	33.424	33.6723
MEMO1	9.07339	9.61528	11.5385	10.3152	9.63533	9.43625	8.23143	8.2177	8.79461	8.90389	9.71162	11.6543	9.82184	8.33977	9.42444	7.6304	7.00727	8.70836
DPY30	94.3745	128.524	95.5974	70.4515	80.1484	72.1276	66.8605	69.1791	70.039	101.972	100.901	107.437	76.4876	76.3064	81.6309	73.383	63.0034	74.8919
SPAST	65.418	75.4112	60.9296	63.4861	64.5066	62.0948	74.5077	74.013	72.2112	67.8516	66.5869	67.3362	65.3153	65.1701	75.8239	62.5335	70.8168	66.6351
SLC30A6	63.0096	78.8911	59.781	58.5412	67.1345	61.1187	65.639	64.5063	60.8206	61.8073	68.828	72.0564	62.1232	72.9106	72.5872	65.6334	73.4833	69.7314
YIPF4	62.7856	69.8252	58.1103	71.8339	71.389	65.5114	88.3153	80.7268	78.9396	84.0995	56.178	60.1932	78.0223	66.1689	69.9693	90.0149	73.6693	78.7623
BIRC6	196.086	116.574	197.564	271.969	202.467	271.048	226.338	221.717	241.428	150.781	195.179	151.966	259.726	281.355	203.958	192.787	234.03	186.682
TTC27	45.815	60.8052	52.2105	35.784	39.0418	38.0161	28.04	28.3591	30.1984	46.0793	48.3091	55.473	35.2972	36.6551	39.1733	31.8927	28.5252	29.6729
LTBP1	97.6229	79.8068	103.638	116.125	107.928	129.667	153.529	138.143	143.84	81.8248	105.882	85.2145	105.339	128.642	96.2911	98.6587	160.795	122.24
FAM98A	71.1869	79.6236	91.525	109.692	122.256	127.064	86.0317	94.423	104.423	46.5992	84.4164	83.5437	94.5352	121.601	124.279	72.5484	106.411	93.5343
FEZ2	64.3539	63.0945	58.3191	81.2984	82.9014	75.6527	86.9877	88.4611	83.072	52.5785	55.6302	58.1882	67.6479	73.1103	75.8239	79.5231	70.5688	73.9888
STRN	114.37	103.708	118.309	104.694	101.421	109.656	112.425	113.329	120.105	103.532	116.44	107.312	94.4125	100.976	106.525	93.4128	108.086	106.694
HEATR5B	50.4637	40.0179	56.7528	65.4002	58.3751	75.0019	63.9927	66.3861	76.9793	43.3496	56.2278	44.7794	70.1648	72.9106	67.1134	57.3472	74.9096	59.5394
GPATCH11	22.7955	30.4484	28.7158	30.9455	31.4087	29.8272	8.8687	9.82901	11.3906	22.4872	27.3419	28.7808	30.2022	31.6612	32.0812	9.77645	11.6581	12.9013
EIF2AK2	105.184	86.9954	102.907	102.62	85.1538	93.7659	88.3153	80.9417	92.6613	90.2088	101.848	96.9524	94.2897	92.2369	88.1042	94.8435	85.0174	79.9879
CEBPZOS	76.5637	87.3617	73.5646	79.331	80.8992	77.2254	77.9596	73.7982	70.5688	93.3284	70.9695	82.1652	78.5747	79.5524	86.2955	80.8942	76.5839	80.375
CEBPZ	100.367	123.625	106.248	75.9281	82.0254	80.6419	60.6471	63.2172	66.9662	92.3535	100.602	111.03	81.0916	82.5987	96.6719	70.7601	66.7241	68.8928
NDUFAF7	17.9788	23.9924	20.1532	18.0781	21.1477	19.7944	15.9318	16.2743	19.4435	18.9126	19.4232	21.6378	18.4773	18.6272	21.1336	17.9434	17.1771	14.9655
PRKD3	60.2652	76.2354	60.6164	36.7943	39.6675	39.2635	42.1662	46.1373	43.8671	53.8133	61.3077	65.2476	36.0953	38.9522	42.172	34.2176	37.9509	31.1566
QPCT	5.76888	8.8369	5.79536	14.1435	13.3894	11.4428	11.2054	11.6015	10.0131	8.57893	8.61595	6.76704	11.7248	10.2874	11.1856	11.9821	10.2319	10.9016
RMDN2	3.64056	4.07505	2.61052	4.2005	4.00429	2.92849	4.46091	3.81344	3.81453	4.15948	2.53996	3.46706	3.99012	2.84651	3.99825	4.59016	3.65866	3.93489
CYP1B1	60.9933	53.754	53.2025	62.4758	57.2489	52.279	56.6641	54.9458	43.7611	69.8013	80.731	59.0654	79.6797	96.7314	67.0182	87.9881	100.706	70.2475
ATL2	119.914	151.006	129.43	110.861	109.743	105.805	87.9436	85.1848	81.0588	117.635	120.972	134.171	106.199	104.172	117.092	84.2325	87.1258	88.0512
HNRNPLL	66.7062	93.1766	79.2033	64.8154	73.1409	71.5853	71.64	75.4632	72.582	71.6211	79.0875	82.0399	65.8677	73.0604	79.013	64.9776	68.7704	75.15
GALM	2.07232	1.73991	1.25305	2.07367	1.56418	1.41001	0.690378	0.698236	0.794694	1.75478	1.69331	2.04682	2.45546	1.7978	1.85633	1.25186	0.682123	0.967596
SRSF7	207.624	250.547	199.079	145.157	145.218	134.873	99.4145	105.111	108.025	167.029	196.822	209.945	154.633	139.279	158.788	105.097	106.101	107.855
GEMIN6	25.932	39.8347	28.2981	18.9289	21.7108	21.4756	18.2685	19.6043	16.4767	21.3173	29.2843	31.496	19.4595	20.7246	24.4179	18.4203	18.7894	19.3519
DHX57	48.5034	43.8182	52.1583	54.7129	57.6243	55.8582	48.4858	49.2525	45.2975	43.9995	53.9867	48.4136	55.6776	58.6281	52.596	45.544	46.5084	44.8965
MORN2	12.994	18.9558	13.9924	26.5323	30.2825	23.6448	18.1623	18.745	18.172	20.4075	14.0943	18.129	34.0081	29.5637	33.7947	28.3756	25.0525	25.4155
SOS1	68.1624	66.8033	73.6168	90.6033	92.2238	99.2433	100.795	101.459	105.006	83.5146	87.2552	76.8602	100.981	112.113	104.002	90.5514	107.713	94.2438
SOS1-IT1	2.12833	2.01463	2.55831	1.70147	1.68931	3.09118	2.92083	3.54489	3.28473	2.85964	2.93839	2.17214	1.8416	2.79657	2.95109	2.74218	3.22458	2.70927
MAP4K3	59.8172	66.0249	58.3191	76.5661	75.3307	78.6354	68.3474	63.6469	70.9397	58.1028	62.6026	64.2033	77.0401	76.6061	85.9147	71.7735	73.6693	70.5055
MAP4K3-DT	5.37682	6.73069	4.75115	13.3459	13.5771	12.7986	7.43484	5.10249	7.04628	7.01913	6.37481	6.47463	14.4258	11.6857	14.0891	7.69002	8.74358	9.28892
THUMPD2	8.45729	10.6226	9.13683	8.08198	7.32035	7.53815	5.57613	4.35055	6.19861	9.42383	10.7077	11.0695	8.04163	7.04137	10.1384	5.2459	4.65084	4.83798
PKDCC	2.35236	1.51097	1.984	5.42344	4.06686	2.6031	1.11523	0.966788	0.847673	1.88477	2.34075	2.17214	6.13865	5.04381	3.61746	0.894188	1.24022	1.41914
EML4	138.901	119.55	141.96	124.739	122.694	127.552	124.534	124.179	137.853	125.564	139.549	127.112	118.292	131.838	119.947	111.595	134.254	114.692
COX7A2L	195.694	237.452	179.552	228.635	257.151	211.936	224.851	232.459	203.918	236.051	182.977	198.75	245.301	238.607	246.273	245.425	224.605	235.706
KCNG3	0.616094	0.641018	0.417684	3.03074	1.87701	1.8981	0.371742	0.214842	0.476816	0.259968	0.647441	0.375947	3.06933	1.99755	2.23711	0.298063	0.620112	0.645064
MTA3	104.12	106.775	98.8344	95.9204	86.1548	90.5663	90.5458	76.8597	95.2573	116.466	97.5146	105.474	99.9372	91.5377	105.287	101.997	92.7688	101.34
OXER1	0.0560086	0	0.104421	1.75464	0.938506	0.976163	0	0.0537105	0	0.129984	0	0.0835437	1.59605	0.848959	1.09476	0	0.0620112	0
HAAO	0.560086	0.915741	1.09642	15.9513	15.5166	10.9547	0.424848	0.0537105	0.370857	0.909887	0.747048	1.37847	22.7744	14.9816	13.9939	0.536513	0.434079	0.580558
ZFP36L2	219.05	192.351	221.216	438.501	529.13	495.349	506.684	600.214	591.411	297.143	299.616	249.378	550.637	671.427	472.793	626.349	757.901	703.249
THADA	64.0738	68.0853	67.6648	63.1671	64.3189	65.6741	64.099	67.514	64.3702	66.6167	70.3719	68.5476	70.042	77.1054	74.4435	71.6543	81.6688	75.15
PLEKHH2	31.4768	28.8	25.5831	23.1825	22.5867	19.0894	17.4719	20.2488	18.4899	37.5003	25.3	24.0188	20.2575	18.2776	19.9436	18.4203	15.5028	14.9655
C1GALT1C1L	1.62425	2.65565	1.93179	1.11659	1.43904	0.759238	1.27454	0.913078	0.423837	2.20972	1.4941	2.04682	1.59605	1.29841	0.904365	1.4307	0.558101	1.16112
DYNC2LI1	27.9483	32.5546	26.9406	30.8391	31.4087	29.6645	28.9959	25.1365	28.9269	34.2507	25.5988	27.82	29.9566	26.2178	33.7947	33.7407	26.9749	32.3177
LRPPRC	463.751	433.878	411.471	416.009	410.753	422.191	459.473	423.614	445.664	522.405	419.691	404.226	391.769	409.398	403.299	428.793	423.413	411.099
PPM1B	69.3386	71.7483	79.4643	65.7193	69.8874	66.0537	74.614	73.6908	74.5423	56.283	71.866	69.8007	60.036	60.0763	69.4457	66.5872	68.2744	66.9576
PREPL	94.4865	101.922	100.192	120.432	126.886	131.077	100.583	99.5792	112.635	129.789	101.997	100.252	120.931	124.298	145.508	95.9762	116.209	113.918
CAMKMT	10.8657	9.61528	8.61473	8.82637	8.38399	9.27355	9.34666	9.66788	8.47673	13.4533	9.61202	9.64929	11.8476	9.83794	11.5188	11.0283	11.286	13.1593
SIX2	2.07232	1.55676	2.24505	1.75464	2.75295	1.84386	2.60219	3.75973	2.49004	1.75478	2.63957	2.29745	1.96437	2.447	1.66594	3.27869	2.97654	3.74137
SRBD1	53.5442	56.7759	60.8252	46.5246	51.0547	50.0013	38.3425	39.9606	38.7811	51.0836	54.1859	56.8097	51.2577	52.1361	59.1169	39.4635	44.214	41.9292
PRKCE	34.2772	30.1279	32.4227	38.4426	34.3493	37.6365	38.9267	37.5436	37.0327	37.1754	35.4599	30.9947	40.3923	35.8061	35.2226	35.6483	35.0363	29.7374
EPAS1	20.1071	12.5456	18.4825	49.768	61.1906	53.2009	86.0317	97.0011	88.317	18.8477	20.4193	18.2961	45.9171	55.8315	39.6969	59.7317	78.5062	61.7326
ATP6V1E2	15.5144	16.1628	15.9242	16.7488	18.3321	16.7032	17.6312	14.7704	18.7548	19.0426	14.2437	14.829	16.6971	18.4773	16.8022	15.6781	16.805	15.9976
RHOQ	76.0596	73.5798	74.0867	107.352	116.625	99.6229	113.806	113.436	105.588	67.0067	62.4532	65.2894	93.6758	98.5292	97.6714	86.2593	90.1023	82.4392
PIGF	23.9717	26.6023	22.1372	20.524	21.3979	21.9094	19.2775	18.7987	21.8806	24.437	22.5608	27.1517	26.1507	23.621	26.3694	24.7392	22.014	22.8353
CRIPT	25.3159	34.0198	21.093	24.0333	26.7787	22.0721	38.555	35.2878	31.4699	28.7264	21.4652	26.9428	26.8873	27.6161	28.5113	41.1923	32.1838	35.9301
SOCS5	33.4931	34.3861	32.4749	35.9967	36.1012	34.1115	47.1581	51.6695	50.3836	34.1857	36.8046	34.5035	38.3052	39.5016	38.0309	50.1341	50.5391	47.0252
MCFD2	243.861	266.206	249.148	248.893	269.226	257.273	255.281	259.851	268.924	267.832	263.011	271.726	260.586	271.217	284.351	265.753	284.818	285.763
TTC7A	67.6584	55.4939	75.2353	74.333	69.7623	74.1342	48.5389	52.2603	55.5226	61.4823	74.1071	71.0539	90.1154	90.2893	82.9636	45.1267	59.2827	49.6699
CALM2	556.949	705.029	547.584	590.41	684.171	601.859	542.85	551.069	553.16	641.925	544.747	562.792	531.976	536.842	582.459	487.154	496.4	469.671
EPCAM-DT	0.168026	0.183148	0.104421	0.265855	0.688238	0.488082	1.38076	1.66502	1.11257	0.454943	0.249016	0.292403	0.245546	0.249694	0.713973	1.66915	0.806146	1.22562
EPCAM	638.442	670.643	604.336	616.464	687.549	619.321	901.793	888.586	814.19	689.759	638.128	605.984	638.665	625.833	628.01	913.443	796.844	800.137
MSH2	222.914	245.052	218.449	101.291	99.4816	108.3	100.158	94.3156	98.8069	200.955	220.778	224.858	114.547	111.963	120.043	108.316	95.6833	103.726
KCNK12	2.40837	1.73991	1.56631	2.76489	2.44012	2.92849	4.46091	3.97457	3.33771	1.36483	1.74311	2.33922	2.45546	2.24724	1.90393	1.72876	2.72849	2.96729
MSH6	286.876	278.11	282.093	179.452	175.876	177.77	132.128	140.829	149.032	219.608	281.986	268.885	172.005	183.625	177.589	144.858	162.593	156.299
FBXO11	94.7665	83.2408	100.766	95.3887	98.1677	100.816	105.681	109.892	108.29	102.817	105.782	91.898	104.173	104.372	98.9566	106.528	111.62	98.5013
FOXN2	36.2375	44.3676	33.5713	24.0864	29.9696	26.1395	27.031	27.822	26.3309	30.0263	35.0614	37.1352	24.1863	27.2166	28.9873	23.2489	23.2542	22.7708
PPP1R21	30.7487	32.5088	31.0652	30.2543	36.2263	33.2438	37.2273	41.1422	40.3704	31.976	34.6132	31.4124	33.8854	35.856	37.317	41.1326	44.276	41.3486
STON1	6.72103	5.03657	5.22105	12.3357	18.4573	12.4732	32.6602	35.986	29.5626	5.39433	4.33288	4.63667	9.20798	9.83794	7.7585	10.8495	14.8207	12.5142
ASB3	24.0277	30.952	25.2699	20.6303	23.2124	21.2044	18.6933	19.7117	18.3839	25.4118	23.4075	25.6897	23.2041	19.7258	24.5131	21.4009	20.0296	19.8035
CHAC2	9.85751	15.4302	12.6349	4.83855	5.81874	5.42313	2.97394	2.041	2.596	7.34409	10.3591	13.0746	3.86735	4.79412	6.04497	2.02683	2.29442	3.48335
ERLEC1	127.98	153.112	128.803	174.932	171.809	168.985	164.629	151.732	162.171	162.285	132.476	145.951	193.183	194.911	214.906	219.136	203.025	209.904
PSME4	131.396	135.026	158.25	136.543	134.582	139.808	120.232	128.046	125.085	91.3786	157.776	144.405	120.686	139.928	128.705	110.283	131.464	116.434
ACYP2	8.73734	10.1189	9.34568	13.1332	14.3279	12.0936	15.7194	16.8114	13.7747	11.3736	8.46654	10.4847	15.408	15.1314	16.1834	17.7645	19.1615	18.7069
SPTBN1	207.232	133.79	224.714	162.756	152.789	181.404	252.519	254.104	256.845	150.976	177.897	143.82	138.365	152.363	122.375	184.441	217.473	183.069
EML6	5.54485	4.34977	4.64673	6.38051	4.88023	6.18237	7.43484	7.57317	7.47012	5.32934	5.72737	4.34427	6.99806	5.74296	5.94977	7.74963	8.43353	8.19231
RTN4	322.385	318.495	336.914	415.584	416.509	418.937	328.62	343.854	327.838	284.47	350.415	336.054	410.676	412.844	382.642	280.06	289.53	281.828
CLHC1	3.86459	3.80032	3.75915	2.97757	4.00429	4.17581	4.4078	4.18942	4.07943	4.28947	3.58583	5.09616	4.78815	3.64553	4.75982	5.48435	4.58883	4.90249
RPS27A	467.504	588.455	445.199	495.872	589.444	492.149	486.876	474.156	475.545	558.021	436.226	464.043	567.027	484.805	509.396	528.763	465.394	518.438
MTIF2	80.5403	95.3744	84.9464	58.8602	65.5077	66.2706	65.5328	66.6547	66.1715	91.0537	82.5737	89.7259	65.745	66.9179	78.6322	74.9926	68.7084	71.1506
CFAP36	38.6459	50.6862	40.8808	48.0665	47.9889	45.9339	44.3435	44.15	46.4101	42.3097	43.0798	46.0743	51.6874	44.046	56.4514	49.8957	46.1984	50.5085
PPP4R3B	188.021	209.109	210.095	181.1	199.464	206.296	198.51	216.292	217.057	206.219	227.999	220.722	215.221	224.674	242.846	219.076	233.534	233.513
PNPT1	77.6279	113.186	95.8062	58.2753	59.9392	55.7498	41.1572	39.1549	42.5956	64.147	84.8148	91.1879	59.3608	53.5344	61.0209	41.7884	38.3849	37.9943
EFEMP1	148.703	141.345	123.895	138.351	138.711	162.152	210.034	199.481	195.283	152.861	145.126	152.133	129.648	159.454	144.651	185.812	199.924	186.488
VRK2	36.4056	45.8786	37.0172	35.465	37.9156	34.1115	29.049	29.5945	30.3573	42.9597	39.4441	41.0617	35.1745	37.6039	41.696	33.8003	31.8738	31.2211
FANCL	28.0603	36.7212	27.9326	19.4074	20.522	18.1675	11.3116	13.2128	12.6091	31.7161	29.9815	30.4934	21.2397	17.129	22.038	16.5723	15.3168	17.2877
PAPOLG	26.1	29.1663	24.4345	24.0333	24.0883	23.1568	27.4027	27.4998	28.1851	23.3321	25.1506	24.4783	23.8794	25.0193	22.8471	24.0238	24.9905	20.255
REL	55.5045	34.2945	42.5515	35.6777	23.9006	34.6538	60.7002	45.0631	52.4498	49.8488	40.241	34.963	31.4913	29.8134	30.1772	40.5365	41.6095	37.6717
PUS10	10.3616	11.401	10.0244	13.7713	13.8899	14.1001	14.0731	15.0926	15.4171	15.1431	10.7077	12.3227	16.0833	13.833	18.8013	18.5991	17.2391	17.5457
PEX13	79.9242	92.1235	72.7292	87.6789	97.3543	93.9828	83.3764	85.3996	85.4031	96.9029	81.478	90.9791	97.1135	99.4281	109.714	97.3472	101.822	98.9528
C2orf74	13.33	15.0181	11.4863	10.3152	12.9514	11.2259	10.3557	10.6884	11.2317	17.4828	12.4508	14.1189	10.6813	11.2362	14.0415	14.2474	12.1542	12.8368
USP34	223.53	171.839	233.433	237.568	210.413	254.941	245.084	241.053	259.282	210.639	233.726	193.988	245.116	247.896	227.234	228.912	249.657	226.03
XPO1	464.927	570.323	534.479	333.275	382.66	386.778	313.485	332.575	348.659	437.98	529.607	528.957	355.796	380.983	420.435	290.671	317.001	325.435
FAM161A	6.60901	8.60796	7.30947	2.76489	3.37862	3.6335	1.38076	1.93358	1.32449	5.97926	7.42067	7.47716	3.1921	2.94639	2.85589	2.20566	2.41844	2.25772
CCT4	433.058	565.195	496.208	344.548	394.298	374.684	291.233	303.41	305.268	409.579	485.88	519.433	359.172	364.952	379.119	293.115	298.212	314.662
COMMD1	28.6764	39.5142	28.5591	28.3401	31.5964	30.3153	24.1632	22.3973	21.9865	28.5314	26.1965	32.7073	32.5962	33.5089	35.5558	25.5142	25.4246	30.9631
B3GNT2	67.2663	79.0742	64.5844	85.552	91.8484	87.692	62.5058	64.6137	65.8536	52.5785	68.3798	69.5501	72.6816	80.2017	78.2038	58.301	61.8252	59.0234
TMEM17	2.01631	2.79301	2.5061	2.07367	2.81552	2.49464	1.7525	1.12792	2.11918	2.14473	1.89252	3.29998	2.51685	3.0962	2.99868	1.66915	1.92235	1.48365
EHBP1	57.5208	53.2045	60.4075	44.0787	43.1087	41.0531	42.6441	44.0963	45.8273	55.3731	62.4532	59.9844	41.8656	45.4443	45.1707	40.9538	42.0436	43.2838
OTX1	7.28111	6.27282	8.9802	6.27417	6.13157	5.80275	5.3106	5.69331	6.35755	7.01913	7.07205	6.68349	6.32281	7.39094	7.23492	5.06706	6.57319	7.16021
WDPCP	9.96953	8.56217	8.77136	8.18832	7.88345	7.59238	7.48795	7.94915	7.84098	11.2436	7.8689	8.85563	9.45352	8.18996	8.75806	6.73621	6.88325	6.51515
MDH1	221.178	298.257	221.164	181.366	195.772	188.4	171.001	165.482	171.76	213.823	221.525	249.879	186.001	186.122	204.767	173.651	167.306	187.327
UGP2	152.175	188.093	160.234	178.016	201.466	177.824	148.803	149.208	155.071	163.65	166.99	176.987	207.732	201.703	226.567	177.228	170.593	178.812
VPS54	35.4534	37.0417	36.3907	48.7046	48.4269	49.3505	77.9065	76.9671	71.3635	41.4648	42.1833	36.9681	57.8261	57.879	54.3095	89.3592	92.0867	71.4731
PELI1	8.68133	12.4541	9.13683	9.30491	9.8856	9.27355	10.6743	10.2587	10.1721	11.1786	12.1022	14.6201	9.63768	10.8866	12.4231	11.8629	12.8363	11.6757
LGALSL	15.5704	21.9778	16.9162	9.99614	10.3861	11.4428	14.4979	14.7704	15.0992	13.5833	19.5228	20.0087	11.5407	12.7843	10.662	18.2414	17.7352	16.1911
AFTPH	85.189	88.0027	85.2075	101.716	97.4169	100.057	116.196	120.687	120.105	99.0477	99.457	89.4335	113.872	118.904	116.378	155.589	144.486	146.817
SERTAD2	59.7612	47.6185	58.3191	42.9621	36.7269	40.4565	47.4768	43.6129	48.4763	61.2224	62.3536	56.8515	47.6359	42.3481	42.9336	50.7303	50.6012	54.8304
LINC02245	3.13648	3.20509	2.19284	1.54196	2.00215	1.95233	3.45189	3.0615	2.43706	3.89951	2.34075	2.79871	1.41189	1.64798	1.33275	2.20566	2.17039	2.32223
SLC1A4	44.8069	39.2853	46.0496	8.66686	10.0733	12.419	25.1723	24.116	26.013	79.8101	47.2134	46.9098	11.3565	16.2301	14.9458	37.6155	43.9039	42.1227
CEP68	40.2702	36.1718	37.8004	25.8942	30.4702	26.6818	43.5469	40.9274	40.1585	41.5298	38.7469	37.0516	28.4833	26.6673	26.4646	34.9926	39.3151	31.2211
RAB1A	269.569	327.789	282.824	325.938	357.07	327.34	297.287	311.628	306.54	285.444	291.647	308.736	328.172	347.923	368.362	323.04	326.303	342.787
ACTR2	457.254	505.123	496.835	570.79	613.595	586.023	494.948	509.121	526.087	412.179	500.572	474.319	555.855	581.986	611.351	473.741	517.546	498.699
SPRED2	117.73	94.1839	114.602	117.242	118.377	129.938	128.623	131.161	135.893	120.755	122.366	99.6258	112.583	116.307	103.193	119.94	129.665	130.109
MEIS1	3.80858	3.8919	5.42989	5.79563	6.19414	7.26699	2.54909	2.20213	3.01984	4.54943	5.27914	6.05692	8.28718	7.19118	8.66287	1.96721	3.22458	3.41884
ETAA1	23.6356	27.3349	23.1292	19.9923	21.7108	19.1979	17.8436	16.9725	19.1786	21.9673	23.9553	25.6479	18.4773	19.5261	21.6572	20.7452	16.1229	17.3522
C1D	27.8923	41.712	26.7318	26.9045	29.4691	29.4476	29.1552	27.2312	26.2779	27.6866	30.3799	36.0909	33.9467	29.4139	40.506	33.2638	32.8039	31.9307
PNO1	66.2581	90.8873	68.3957	61.1466	63.6933	58.4613	42.1131	45.8687	42.3307	58.2328	67.5829	71.6387	58.2558	57.6793	61.8776	43.994	45.6403	46.9607
PPP3R1	169.202	192.672	168.066	164.883	171.434	160.525	152.733	156.673	156.82	167.289	173.813	170.471	168.997	165.797	160.501	155.052	153.292	145.978
FBXO48	1.62425	1.87727	1.56631	1.06342	1.06364	1.78963	0.955908	0.698236	1.00661	1.94976	1.34469	1.42024	1.78021	1.64798	1.38035	0.774963	0.992179	0.90309
ANTXR1	45.591	36.6754	34.9288	50.6719	50.9922	44.6324	82.2612	80.888	67.496	59.5976	45.5201	45.03	60.4657	55.8315	54.2143	92.5782	77.9481	71.8601
GFPT1	226.331	203.569	248.679	208.271	212.853	234.55	214.655	199.427	235.653	233.191	280.243	266.295	252.483	289.745	303.867	285.842	323.823	319.823
NFU1	31.4208	41.8951	29.4989	25.9474	28.7183	28.5257	21.561	20.1414	23.47	31.1311	32.8203	36.1744	30.2022	30.962	33.0331	22.5335	26.7888	25.351
AAK1	40.8303	25.8697	40.8808	67.9525	51.305	69.7957	54.0088	59.9409	59.0722	29.5713	41.4861	32.3732	52.9766	60.2761	45.5039	39.7019	45.2062	42.0582
ANXA4	133.804	155.493	121.128	132.023	141.84	136.826	131.862	137.982	135.946	142.397	128.99	139.56	131.429	140.078	151.553	136.632	131.216	143.333
GMCL1	74.3794	84.9349	79.4121	58.9134	67.0093	65.4029	69.0378	70.5218	73.7476	75.5206	78.3902	79.3247	64.2717	69.9143	72.4444	69.8659	76.2118	73.2148
SNRNP27	39.318	51.0983	41.8728	38.7084	40.7937	37.3111	35.4217	33.1394	34.2778	38.2802	38.3485	45.7402	39.5329	34.258	46.1702	34.0984	32.3078	37.4137
MXD1	12.5459	9.89	13.157	52.267	38.291	38.45	29.3145	23.4715	25.2713	12.8684	13.3971	12.7822	43.2161	34.1581	36.127	21.3413	21.952	23.3513
PCBP1-AS1	11.2577	11.6299	10.5987	13.2396	11.8252	12.5817	17.8967	14.8778	17.2713	16.8329	9.96064	12.9493	12.0931	12.4847	14.327	21.8778	22.014	22.7063
PCBP1	573.08	550.314	561.941	461.364	489.963	475.88	473.918	499.507	483.863	470.736	563.822	546.96	499.441	483.657	485.263	511.893	495.718	514.761
LINC01816	1.73627	1.69412	1.77516	2.18001	2.00215	2.27771	1.22144	1.50389	1.11257	2.27472	2.34075	1.58733	1.71882	2.19731	1.85633	1.84799	1.86034	1.80618
C2orf42	9.91352	9.79842	10.6509	9.62394	13.2016	10.9547	10.7805	13.4276	10.0661	11.7635	12.0524	11.2784	10.6199	13.5833	12.4707	11.3264	13.5184	10.6436
TIA1	74.2114	115.292	83.85	59.2324	66.0708	62.7998	64.4707	65.9564	68.3966	83.3846	82.4243	90.3943	64.1489	59.5769	71.9208	60.0894	57.9805	55.9916
PCYOX1	184.94	195.373	204.247	382.139	379.782	384.608	269.991	260.872	271.573	174.373	212.012	198.207	418.963	441.059	435.952	269.27	299.762	296.149
SNRPG	94.8785	135.209	102.333	59.5514	75.8313	63.9929	53.6371	55.0532	56.1054	103.077	95.7217	104.764	66.1133	61.125	71.0641	59.3741	55.9341	58.8943
FAM136A	126.355	151.692	132.823	94.2189	106.489	99.0806	90.5989	98.0216	99.2837	121.86	142.437	144.029	104.91	99.5779	105.811	107.303	98.5978	105.92
TGFA	39.094	39.6058	43.2825	23.9801	24.9017	24.3499	39.7233	39.692	43.1254	43.4146	41.9343	44.4452	24.9843	28.1655	29.8917	41.4307	45.2062	47.3477
VAX2	7.39313	6.31861	7.77936	11.7508	12.0754	11.497	8.8156	10.5273	8.90057	5.78428	7.52028	7.10121	11.1723	11.8854	11.138	9.00149	10.4799	8.90188
TEX261	143.102	134.797	141.386	182.057	184.51	179.126	178.171	180.36	173.826	136.678	156.382	140.688	186.001	195.66	170.973	172.876	187.522	190.681
NAGK	71.747	72.7556	70.0143	108.362	109.43	108.408	111.788	107.582	111.84	102.427	76.1491	80.9538	123.817	125.246	120.519	109.747	132.828	130.948
MCEE	12.826	14.6061	11.5385	28.3401	25.0268	24.2414	11.9489	10.6347	11.6555	19.6276	13.148	14.3695	36.218	31.5613	34.8895	17.8241	17.0531	16.7717
MPHOSPH10	68.8905	73.9003	73.4601	85.3393	79.9607	78.31	47.9016	48.1783	53.4564	71.2311	72.4138	70.9703	89.0104	86.0944	96.2911	52.9359	50.4771	52.2502
PAIP2B	23.9157	21.1078	21.3019	22.3318	22.1487	23.4279	18.6402	18.8524	20.1852	30.2212	26.6945	26.3998	31.2457	32.0607	34.6039	27.839	34.2302	35.6075
ZNF638	129.268	137.041	153.186	131.173	140.588	154.451	139.403	149.798	164.925	129.529	159.52	139.184	150.458	156.159	165.023	137.168	150.625	142.753
DYSF	0.728111	0.274722	0.887578	0.797564	0.688238	1.13886	0.159318	0.214842	0.370857	0.584927	0.697245	0.250631	1.16634	1.44822	1.61834	0.298063	0.248045	0.451545
EXOC6B	51.5279	41.2999	47.877	67.7929	65.1323	69.5788	89.9616	86.635	88.264	48.029	50.6	47.2857	57.8261	66.1189	61.354	74.456	87.5598	77.1497
SPR	78.692	89.1931	85.6252	114.583	128.388	121.858	128.623	137.66	113.959	71.0362	91.0402	82.3323	121.791	118.654	110.761	133.83	126.999	129.142
SFXN5	60.0972	56.6386	65.6808	117.774	109.868	105.859	80.0839	81.3176	78.1979	44.7144	60.3615	61.7805	79.4341	82.349	77.7754	60.2683	62.2593	63.9903
RAB11FIP5	16.4665	12.9577	16.0808	30.5201	28.3429	30.478	25.5971	25.3513	23.5229	13.3233	18.5766	16.4163	24.4318	29.9633	25.0366	21.4009	25.5486	26.7056
SMYD5	79.7562	78.8911	75.0787	47.588	48.99	48.6997	47.6892	49.4673	43.7611	63.6271	70.7205	79.0323	48.6795	45.8438	48.9309	47.6304	43.7179	46.9607
PRADC1	23.1315	33.1956	27.3061	24.2991	25.152	26.2479	15.6132	17.7782	17.8011	18.7177	25.8479	29.5327	26.9487	28.8646	32.5096	20.8644	25.0525	26.0606
CCT7	501.277	610.616	549.411	490.502	560.976	501.151	369.99	402.99	384.261	434.341	522.784	574.237	485.322	508.576	533.718	390.879	394.639	409.68
FBXO41	30.9727	19.9631	30.3343	39.7187	31.1584	33.1353	36.59	33.945	31.7878	32.8859	28.6866	22.9745	36.4022	32.2604	29.6061	36.4829	36.4626	30.06
EGR4	1.9603	0.732592	1.40968	8.45418	4.9428	11.0632	6.95689	5.37105	8.63567	3.2496	3.83485	2.04682	11.4179	9.18873	6.52095	9.23994	8.49554	6.38613
ALMS1	82.4446	63.9645	90.5852	66.3573	45.9242	61.7152	62.134	50.649	56.7941	66.4217	81.1294	73.0172	65.5608	57.8291	54.7379	52.5186	48.3688	45.5415
ALMS1-IT1	2.35236	1.19046	1.82737	0.638051	0.375402	0.650776	0.318636	0.107421	0.264898	2.66467	0.946261	2.42277	0.491092	0.499388	0.856767	0.4769	0.434079	0.516051
TPRKB	29.1245	48.6258	34.3023	31.5304	36.9146	32.0507	26.1813	26.4793	26.8606	32.366	32.8701	37.4693	36.2794	34.6575	36.9838	30.6408	29.7654	30.3825
DUSP11	38.4779	50.961	37.8526	41.7392	48.6146	41.6496	40.0419	41.8404	37.8274	43.9345	39.4441	44.1111	46.3468	49.5393	53.0244	45.6036	42.4777	42.1227
STAMBP	103.56	117.49	102.333	111.393	115.749	108.029	109.823	108.012	106.754	101.192	102.246	107.354	106.935	116.207	121.518	112.966	109.264	110.112
ACTG2	0.0560086	0.0915741	0.313263	0.638051	1.25134	1.7354	1.96492	2.68552	2.8609	0	0.0996064	0.167087	0.0613865	0.499388	0.618776	0	0.372067	0.580558
DGUOK	74.7714	86.217	68.0825	65.1876	64.3189	60.034	64.099	60.7465	61.2974	69.1514	69.6249	77.6121	64.5172	64.1713	61.6396	66.5872	57.7945	60.9585
DGUOK-AS1	3.30451	3.66296	3.91579	1.96732	1.62674	1.24732	1.27454	0.913078	0.847673	2.98963	2.58977	3.71769	1.16634	1.74786	1.66594	1.54993	1.24022	1.29013
TET3	196.534	108.607	182.998	175.836	132.642	174.408	189.907	186.107	199.415	153.576	178.993	136.26	157.825	148.518	123.422	143.428	155.276	136.947
BOLA3	50.4637	69.1842	53.6724	39.5592	43.5467	45.8254	27.9869	33.9987	33.3771	44.8444	48.3091	59.6502	38.4893	37.4541	40.6964	29.2697	30.2615	32.7692
MOB1A	359.463	439.281	361.662	350.343	372.712	351.527	381.461	391.979	385.956	359.015	376.512	377.158	359.111	355.414	380.452	377.049	377.214	364.461
MTHFD2	374.865	423.118	354.144	170.572	196.335	170.395	157.406	163.065	158.038	889.544	340.654	380.124	173.171	176.683	205.005	161.55	151.183	166.104
DCTN1	295.221	224.219	305.797	321.525	294.628	329.889	343.649	341.437	355.758	276.281	305.543	260.28	310.861	334.64	302.344	319.225	360.409	346.399
C2orf81	35.6775	25.9155	32.3183	26.1601	25.6525	28.3087	35.2624	36.1471	32.1056	34.9007	31.9736	30.7023	28.2992	26.2678	24.2275	37.3771	35.5324	36.1236
WDR54	74.8275	83.6987	67.2993	50.1402	53.3697	53.4721	51.9377	50.8638	49.0591	79.4851	74.2566	81.2462	52.3013	49.1897	54.4523	60.2683	54.9419	58.3138
RTKN	13.8341	12.2251	13.6269	10.2088	6.88238	8.89393	7.9659	7.94915	7.788	10.5287	12.1022	14.7037	11.111	8.2399	7.94889	8.16692	7.44135	7.28922
INO80B	43.5187	42.3988	45.893	53.9685	49.6157	48.9709	62.134	55.4292	59.3901	46.5342	44.0758	45.2389	54.2657	48.94	48.5977	66.5872	57.0503	56.1851
WBP1	160.185	148.991	146.242	189.82	189.265	184.766	222.461	224.725	204.766	190.881	165.745	171.39	221.421	206.796	222.188	252.34	266.276	284.022
MOGS	134.589	128.982	154.491	146.38	152.914	171.154	144.13	173.431	168.793	120.625	149.36	142.191	147.88	154.71	142.223	153.562	183.677	172.103
CCDC142	14.9543	16.7123	20.4665	16.2703	15.3915	18.3302	17.047	17.0799	18.066	11.9585	17.6801	16.9176	17.8635	17.2289	15.3266	13.7705	16.495	14.5784
TTC31	57.9689	49.1753	55.0298	40.1972	35.9761	38.0161	47.6892	42.109	43.6022	62.7822	50.9487	57.2692	43.9527	38.9023	42.41	49.4784	41.6715	45.348
LBX2	1.79227	1.46518	1.30526	1.16976	0.875939	1.46424	1.32765	0.966788	1.69535	1.03987	0.896457	1.54556	1.3505	1.14859	1.33275	0.894188	0.744135	0.774077
LBX2-AS1	1.17618	0.641018	1.14863	0.531709	0.500536	0.705007	1.38076	0.913078	1.16555	0.649919	0.547835	0.877209	0.613865	0.649204	0.666374	0.774963	0.682123	0.774077
PCGF1	18.4268	20.7873	18.4303	15.6323	17.7065	15.5644	16.7815	16.0594	15.3641	20.1475	20.5189	21.7214	15.4694	17.4286	15.7074	16.4531	15.8129	15.7396
AUP1	175.083	202.653	174.174	167.595	167.242	161.826	149.812	151.625	150.409	159.62	185.218	193.32	179.31	173.437	172.21	165.186	158.191	173.393
HTRA2	30.4687	44.2761	37.8526	29.563	31.8466	27.1156	30.5891	34.2136	31.046	26.7767	37.1034	36.425	28.422	29.9633	28.6541	28.7928	32.6179	30.447
LOXL3	6.60901	8.01273	5.79536	1.43562	1.00107	1.03039	1.69939	1.12792	1.16555	4.93939	6.325	5.97337	1.47328	0.948836	1.09476	0.894188	0.868157	0.838583
DOK1	29.6845	24.4961	24.8522	7.76296	8.25885	9.16509	8.07211	7.46575	8.42375	27.2966	23.6565	23.5593	6.32281	8.09008	8.18689	5.96125	6.0771	7.86978
SEMA4F	18.9869	19.0474	21.3541	25.3094	20.1466	24.0787	17.4188	16.2743	20.4501	15.728	19.5228	21.2619	21.2397	20.0754	21.9904	12.6379	15.9369	16.9007
HK2	132.572	94.8707	132.04	183.759	172.059	190.406	292.827	256.145	278.249	109.251	136.062	106.393	166.173	169.942	169.545	342.414	349.309	327.628
LINC01291	0.616094	0.732592	0.678736	17.6527	16.1423	15.5644	0.26553	0.590815	0.317878	0.909887	1.44429	1.67087	24.2477	22.2727	24.8462	0.417288	0.620112	1.29013
LINC01293	1.2882	1.09889	1.5141	35.7309	32.7851	28.0376	0.743484	0.483394	0.688735	2.20972	2.73918	2.25568	51.8716	43.3968	48.9785	0.834575	2.17039	2.12871
POLE4	44.0787	56.9591	43.4913	55.2446	59.3761	54.394	31.5981	37.7585	33.748	48.029	47.6118	48.2047	56.4142	56.9801	57.4034	38.5693	39.9972	44.7674
MRPL19	123.331	133.332	135.904	119.262	116.5	121.315	107.221	102.104	117.191	105.937	135.465	132.834	117.923	125.047	134.227	99.9702	111.31	117.531
GCFC2	22.3474	27.2891	21.1975	22.6508	18.5198	17.4625	17.7905	13.5887	14.1455	20.6674	21.8138	22.3062	24.2477	17.8781	23.4183	16.5127	13.5805	12.4497
SUCLG1	102.048	127.608	97.5814	87.2535	94.2886	91.7051	85.0758	84.594	90.4891	120.17	105.035	115.666	98.8323	102.524	105.382	100.805	99.1559	112.499
TMSB10	405.95	434.519	396.486	446.742	510.109	495.945	508.49	522.764	539.279	405.355	370.884	373.064	410.307	410.097	417.674	380.149	449.395	464.253
KCMF1	93.4223	115.429	99.3043	86.4559	91.7859	87.6378	92.9355	99.5255	93.9328	94.4982	105.334	108.106	91.0976	90.7387	86.9143	102.474	90.5984	95.2114
TCF7L1	4.53669	4.34977	4.69894	8.98589	9.19736	10.5209	18.0029	19.3358	17.0064	4.67942	5.42855	5.22148	8.40995	10.3373	7.7109	12.161	14.4486	12.1272
TGOLN2	305.975	237.864	274.575	383.522	316.214	353.642	410.828	382.15	396.181	297.793	296.229	243.07	372.432	351.069	319.812	407.869	384.408	360.204
RETSAT	49.9596	46.3365	48.0859	78.7462	76.8949	84.4381	99.4145	91.9523	98.1182	56.413	53.638	48.9984	78.145	87.1431	76.871	93.6513	109.574	105.21
ELMOD3	10.4736	14.4229	14.0446	9.67711	9.69789	11.9851	9.66529	11.9237	9.64228	12.5434	14.1939	14.0771	12.7684	11.8355	11.5188	10.9091	12.2782	9.28892
CAPG	16.6906	8.79111	8.9802	12.123	10.0107	10.4124	16.1973	13.2128	14.3575	20.4075	11.2057	10.986	14.4872	11.9853	9.18645	15.0224	14.9447	12.8368
PARTICL	3.02446	2.88458	2.40168	1.70147	2.25241	2.11502	2.49598	2.41697	2.11918	3.89951	3.1376	3.17466	1.96437	2.29718	1.71353	3.21908	2.17039	2.25772
MAT2A	276.794	239.191	210.304	219.171	179.755	177.553	181.198	161.4	168.369	340.168	217.74	218.508	218.29	165.197	183.967	199.106	160.733	160.75
GGCX	58.1929	60.4847	61.5562	89.4867	86.2174	90.0239	88.2622	81.9085	85.9859	60.1825	65.541	64.8299	95.9471	106.519	87.2474	93.2936	104.303	95.921
VAMP8	110.001	138.643	104.786	134.895	155.667	140.513	153.264	151.517	161.323	109.056	113.75	117.797	131.858	136.133	140.843	152.966	153.54	155.46
VAMP5	5.26481	5.6318	4.4901	9.46443	8.69682	9.7074	10.4088	9.61417	10.8078	7.66905	5.62776	6.64172	7.98025	8.33977	8.23448	11.6841	10.852	14.1914
RNF181	66.5382	86.3543	67.2993	75.9813	75.7687	69.5788	74.5077	70.2533	74.7542	82.4097	70.8699	80.0348	74.5232	78.0043	77.0614	85.9016	80.4906	86.3741
TMEM150A	18.7629	15.705	19.4223	36.3689	33.7236	37.745	46.6271	43.3443	45.8803	21.4473	19.6723	18.8391	30.6319	33.0095	32.0812	42.0864	42.1676	47.2187
USP39	113.361	140.566	124.522	80.5008	88.9704	89.6986	83.4827	86.5276	83.2309	94.3033	128.741	136.761	83.9154	87.7923	92.3405	83.0999	87.3118	86.6321
C2orf68	70.4588	67.3527	67.978	52.267	49.4905	55.2075	66.2232	64.0229	61.5093	81.1749	61.2081	72.5995	57.8875	49.5393	56.261	68.8525	61.2051	70.6345
ATOH8	0.448069	0.549444	0.678736	0.265855	0.250268	0.0542313	1.00901	1.18163	1.11257	0.584927	0.796851	0.626578	0.798025	0.549326	0.52358	1.84799	1.36425	2.0642
ST3GAL5	6.60901	6.18125	6.42189	15.4727	13.5771	12.7986	9.29355	8.16399	8.68865	8.059	5.82697	7.76956	12.7684	11.6357	12.7563	6.61699	6.75922	7.28922
POLR1A	105.8	70.8325	112.514	103.683	82.1505	105.48	83.4827	83.4661	92.6083	73.6358	99.5566	76.1501	85.8183	91.6376	69.6837	59.6721	84.1492	63.3453
PTCD3	87.7654	103.296	91.7338	71.8339	75.2682	73.7003	60.2753	56.772	64.2642	92.0285	89.4963	95.9499	68.139	72.1615	79.1082	64.6796	61.8872	61.1521
IMMT	215.857	204.943	209.573	180.888	176.377	189.213	144.501	137.123	152.21	205.439	207.928	211.992	185.326	188.519	195.533	153.085	161.229	163.782
MRPL35	61.7775	77.1511	67.5081	58.2222	60.5649	57.4309	47.8485	49.8433	51.4962	56.478	64.0469	72.7248	61.939	63.2225	73.5392	52.2206	54.6319	54.2499
REEP1	8.68133	13.7819	12.2173	31.1582	21.8359	30.478	13.011	13.911	13.4568	7.14911	11.1061	10.986	33.2715	28.9645	40.3632	11.9225	13.4564	15.6105
KDM3A	52.9281	51.0525	53.2547	63.9115	63.5056	57.1598	74.1891	67.1918	76.6615	51.6036	54.7337	51.4211	61.4479	59.4771	57.1654	66.7064	62.6933	59.0879
CHMP3	155.536	155.951	147.181	209.812	218.922	211.014	235.844	234.446	231.097	149.351	149.31	141.982	210.003	213.338	210.955	217.049	222.372	220.612
RNF103	72.1951	66.8033	65.4719	96.7711	95.9153	92.4644	107.009	94.6915	99.3897	76.6905	73.0613	69.0071	105.339	105.72	99.0518	121.013	120.86	117.918
RMND5A	142.15	119.687	132.562	150.846	149.848	155.102	229.577	215.916	206.991	161.7	137.108	120.595	169.611	163.1	150.839	230.522	217.721	208.033
CD8A	2.12833	2.51829	2.14063	1.70147	1.31391	1.57271	1.27454	0.859367	1.37747	2.14473	1.69331	2.75694	1.96437	0.998775	2.37991	0.71535	1.1162	1.61266
RGPD1	1.56824	2.01463	2.92379	3.03074	2.37755	2.92849	1.64629	1.77245	2.27812	1.81977	2.04193	2.33922	2.70101	2.19731	3.04628	1.84799	2.60447	1.80618
LINC01943	0.112017	0.0915741	0.0522105	4.04099	2.44012	2.6031	0.371742	0.161131	0.317878	0.259968	0.14941	0.125316	3.37626	2.49694	2.85589	1.01341	0.434079	0.70957
CYTOR	43.7427	42.8567	34.9288	58.2753	57.6868	50.9232	99.7862	90.8244	80.529	34.1857	28.1886	26.6922	34.1923	33.459	34.0803	46.7958	42.4157	43.6063
PLGLB2	1.06416	1.00731	0.887578	2.23318	0.938506	2.06079	2.76151	2.41697	2.91388	2.14473	0.846654	1.29493	1.78021	0.79902	1.66594	2.80179	1.55028	2.45124
RGPD2	2.52039	3.29667	3.55031	3.56245	3.81659	2.87426	1.91182	2.25584	3.70857	3.11961	3.23721	2.71517	3.74458	3.39584	3.14148	3.45753	3.34861	3.16081
KRCC1	31.3088	49.0379	32.5793	36.5284	47.3007	38.1788	52.6281	59.6186	53.5624	43.6096	37.8006	41.8136	40.0854	47.292	45.6466	55.4396	58.2905	52.1212
THNSL2	24.3637	21.6115	18.7436	21.1089	19.7086	19.9571	32.3947	29.5945	29.6156	31.4561	21.8138	21.3872	24.4318	21.3738	22.7043	36.1252	31.8118	30.9631
FOXI3	9.40944	8.19588	8.71915	2.81806	4.25456	4.06735	5.36371	6.60639	6.46351	7.14911	8.06812	7.01767	3.31487	4.24479	3.56986	3.87481	5.89107	4.96699
EIF2AK3	54.9444	54.5324	59.6244	55.3509	57.9371	64.5352	70.3124	71.2201	76.0787	47.7691	64.5449	61.9894	53.4063	61.9241	58.3078	70.8197	84.3353	76.8916
EIF2AK3-DT	5.09678	5.12815	4.02021	5.31709	4.81766	4.66389	5.36371	5.85444	5.88073	8.70892	3.58583	6.34932	5.83172	5.59314	6.33056	7.33234	7.50336	6.25712
RPIA	44.1348	43.1772	46.4673	25.3625	28.03	26.8445	25.7564	28.7351	26.2249	38.2802	39.0955	40.5605	22.7744	20.8744	20.7052	23.7258	22.262	22.5772
MRPS5	72.6991	85.1639	82.0749	63.0607	63.8184	68.1145	51.2473	56.1811	60.9265	73.1159	77.2945	85.7994	56.4142	60.4758	69.0173	53.2936	53.3296	55.2175
ZNF514	15.5704	14.5603	15.6109	13.8244	16.4551	14.6424	17.6843	18.4764	22.0925	18.5227	16.6343	16.667	17.1882	16.1802	17.0401	21.4605	19.8436	15.6751
ZNF2	7.00107	6.41018	6.52631	7.07173	6.25671	5.91121	10.6743	9.50675	7.89396	7.73404	6.37481	6.85058	7.05945	7.59069	5.61658	6.6766	8.68157	6.57965
PROM2	126.579	93.6803	123.687	161.427	138.461	177.824	194.952	184.871	213.614	124.525	132.725	111.99	124.185	158.905	133.751	153.8	210.838	199.26
KCNIP3	10.7536	8.69954	11.5385	4.9449	4.88023	5.85698	8.17833	8.96965	7.73502	7.92901	8.51635	9.31512	4.84953	4.44455	4.47423	9.00149	6.6352	5.35403
FAHD2A	44.8629	46.4738	43.909	35.3055	34.1616	36.2265	37.1211	33.9987	36.9798	46.1443	40.0916	45.6148	36.8319	34.1082	39.0781	41.1923	38.2609	40.381
LINC00342	3.86459	3.11352	4.38568	3.61562	1.81444	1.8981	1.32765	1.45018	1.48343	4.8094	3.93445	3.29998	4.5426	0.948836	1.76113	1.78838	0.744135	0.70957
ANKRD36C	4.76073	3.34245	4.02021	2.60538	1.37648	1.30155	0.79659	0.751946	0.953633	5.78428	3.83485	3.84301	2.51685	1.04871	1.71353	1.19225	0.372067	0.90309
ASTL	0.672103	0.274722	0.365473	1.22293	1.37648	0.813469	0.212424	0.429684	0.370857	0.974879	0.0498032	0.835437	2.14853	1.44822	1.76113	0.298063	0.310056	0.129013
DUSP2	15.1223	7.92116	10.7031	11.8571	9.8856	10.6293	14.6042	14.2333	13.7747	14.6882	11.0563	11.0695	14.5486	10.7368	9.66243	14.307	9.48772	11.4821
STARD7	233.668	249.356	229.622	223.424	227.118	217.251	203.98	201.199	191.839	208.429	241.197	231.165	230.568	237.858	231.708	205.246	207.428	210.291
STARD7-AS1	2.68841	2.42671	2.71494	2.60538	2.69038	2.87426	4.24848	3.92086	4.13241	4.22447	3.1874	2.08859	2.76239	2.94639	2.7131	4.88823	3.59665	3.41884
TMEM127	112.297	85.347	104.943	187.534	173.186	174.679	224.16	230.579	211.336	100.737	115.045	96.8689	170.102	176.983	148.887	213.949	219.334	210.484
CIAO1	133.076	154.943	129.273	143.881	156.23	147.346	155.813	154.525	143.893	127.254	137.457	145.45	141.557	140.877	144.794	154.873	148.641	147.913
SNRNP200	639.506	382.459	567.841	489.917	410.502	487.214	495.426	475.714	516.074	581.353	594.052	459.908	470.712	488.151	389.401	428.793	510.166	437.998
NCAPH	79.5882	83.195	84.1633	10.1556	9.13479	10.5209	2.76151	1.98729	2.596	68.1115	77.8424	77.2361	8.53273	13.5334	11.138	3.04024	4.09274	4.70897
ARID5A	15.9064	9.93579	9.65894	8.45418	7.32035	5.69429	11.0992	10.9569	8.79461	12.5434	9.91083	8.8974	4.60399	5.14369	3.95065	6.61699	5.82905	5.28952
KANSL3	78.8601	62.133	64.8976	64.3368	58.6253	59.6002	83.1109	80.4583	77.3502	79.7451	66.8359	61.4464	65.5608	56.5307	57.8318	83.994	75.2196	71.2151
LMAN2L	27.3882	36.5838	29.76	26.1601	30.2825	31.7795	29.5269	34.8581	32.3705	27.1016	31.5752	33.6263	30.5705	31.4115	35.1275	30.7004	31.9358	37.6072
CNNM4	134.253	110.026	124.052	135.214	123.132	136.337	148.644	151.893	155.283	134.338	126.201	109.902	110.557	117.356	102.812	137.586	143.928	146.946
CNNM3	118.01	87.2701	108.546	90.6033	78.334	84.2212	134.783	134.652	122.383	97.2279	107.176	89.7677	96.3768	91.4878	76.0619	144.978	141.758	139.269
ANKRD39	16.7466	18.269	16.4985	12.6547	13.1391	14.1001	12.4268	12.5682	13.7747	13.3883	17.2319	18.6302	14.1189	12.1351	12.3755	14.9031	12.4643	15.0945
SEMA4C	318.073	230.217	273.217	287.229	233.876	270.451	561.702	478.99	500.71	279.595	273.619	249.503	243.029	218.932	197.723	546.706	462.852	438.579
FAM178B	10.4736	8.88268	9.13683	12.8674	11.0744	11.7682	7.64727	8.05657	7.47012	8.8389	8.71556	11.6543	11.909	10.6869	11.138	8.5842	7.93744	8.25682
FAHD2B	4.92875	5.40287	4.69894	4.30685	3.69146	4.39273	5.36371	3.86715	3.81453	5.5893	3.63563	4.84553	4.41983	4.24479	3.95065	5.48435	4.09274	4.83798
ANKRD36	10.8657	12.5914	12.6871	5.95514	3.37862	3.85042	2.92083	1.61131	2.17216	14.1032	11.2057	11.4873	6.13865	3.04626	4.37903	4.2921	1.36425	2.90279
ANKRD36B	6.44099	6.59333	4.90779	2.33952	1.93958	1.8981	1.85871	0.913078	1.48343	5.71929	5.37874	5.6392	3.6218	1.49816	1.95153	1.49031	1.17821	1.22562
COX5B	115.882	133.652	110.007	115.062	125.072	112.205	115.771	117.68	105.111	132.778	112.207	120.386	124.492	107.768	108.857	119.523	116.209	132.819
ACTR1B	79.5322	64.4224	68.3957	92.6769	81.7751	83.0823	122.675	111.395	109.721	89.4939	63.4991	65.4565	82.0738	72.1116	69.3981	97.5857	93.4509	102.372
TMEM131	130.556	89.01	118.152	150.367	123.007	145.611	160.805	155.975	166.197	111.201	121.57	103.97	144.074	152.064	124.279	145.395	172.267	152.235
INPP4A	34.5013	28.5253	33.3103	38.7084	38.0408	48.1574	48.8044	46.3521	54.0392	26.7117	31.1768	29.8669	37.0775	34.258	32.1288	31.8927	38.509	35.414
COA5	30.8047	40.6131	29.1334	30.3606	31.4712	29.4476	39.4578	35.5026	35.6553	43.4796	29.1847	35.0048	35.42	30.4626	36.365	46.3785	40.4313	40.252
UNC50	28.7324	36.3091	27.0972	26.7981	28.8434	25.4345	25.1723	26.4255	23.9468	34.6407	29.4337	32.1225	30.4477	27.2166	29.0825	28.614	30.6335	31.1566
MGAT4A	86.3652	93.8634	94.501	112.935	114.748	137.259	238.446	186.912	222.249	101.907	108.272	100.419	116.082	127.843	152.647	341.103	294.553	288.602
TSGA10	5.32081	5.90653	5.37768	5.52978	5.5059	5.80275	6.95689	8.00286	7.09926	6.56418	4.58189	5.13794	4.60399	5.29351	5.99737	7.86885	5.70503	6.12811
C2orf15	7.39313	8.05852	6.73515	8.72003	9.94816	7.42969	8.55007	10.3124	9.69526	9.03388	7.61989	6.18223	8.04163	6.64186	8.99605	11.6244	8.37151	7.16021
LIPT1	4.53669	6.41018	4.12463	4.30685	4.62996	4.66389	3.98295	4.02828	3.86751	5.91426	4.83091	5.80629	4.66538	4.59437	4.09344	4.94784	4.77486	5.61206
MITD1	12.938	16.987	13.6269	9.1454	8.94709	7.972	7.9659	8.05657	8.31779	16.7679	12.6002	16.3746	11.5407	7.89032	11.0904	9.95529	8.43353	9.74047
MRPL30	66.0901	77.9753	65.7852	63.7519	62.3168	65.2402	53.9026	50.7027	54.7279	75.9106	66.6865	71.1792	64.2103	68.1165	73.4916	55.1416	56.1822	63.4743
TXNDC9	42.1745	72.9387	47.8248	39.0806	46.8627	44.4154	38.6081	40.2291	43.1784	43.0896	46.9146	56.4337	41.6201	45.1946	51.2156	40.6557	41.2995	41.2196
EIF5B	174.187	168.313	204.039	188.066	188.953	179.939	132.977	136.908	145.323	139.603	192.938	164.414	183.791	192.614	179.493	134.128	139.897	129.787
REV1	31.8129	33.8366	31.1697	23.7142	22.0862	21.801	22.7825	22.6658	21.4038	27.2966	28.6866	30.9947	24.3704	22.1728	22.9899	24.8584	23.6263	20.7711
AFF3	15.4024	14.4687	27.9848	35.8372	33.4734	45.6085	24.2694	22.7195	32.2646	6.56418	11.3551	10.4012	15.6536	19.7258	20.9432	16.9896	16.9911	19.4164
LONRF2	127.588	74.5871	131.779	187.055	123.32	186.99	136.536	120.795	139.442	100.023	126.799	91.9816	163.411	174.736	128.991	102.116	124.891	101.662
CHST10	17.2506	15.3844	15.4543	19.9923	16.6428	18.1133	17.6312	15.3612	15.8409	14.2332	15.937	16.6252	19.7051	17.5285	13.5179	14.7243	14.5726	14.3849
PDCL3	60.4893	69.5047	66.6728	61.3061	64.0687	64.1014	63.5148	60.7465	63.0987	57.7128	61.9054	66.5008	60.5885	64.0215	65.7807	61.2817	57.6084	61.7971
NPAS2	4.87275	3.84611	4.12463	8.7732	6.44441	6.72468	7.32863	8.59367	7.62906	5.5893	5.77717	4.46959	7.18222	6.74173	6.09257	8.82265	7.7514	7.48274
RPL31	235.348	301.004	228.473	255.22	304.576	261.612	271.743	276.072	252.289	298.183	232.481	261.784	303.74	262.129	288.255	319.702	274.772	314.727
TBC1D8	32.2609	25.1371	30.4387	27.0108	25.0894	26.5733	34.6782	36.0397	37.0857	44.5195	33.8164	29.4491	30.2022	30.8622	24.3227	43.696	39.1291	41.3486
TBC1D8-AS1	1.40021	1.60255	1.40968	1.6483	1.62674	1.46424	1.85871	1.12792	1.00661	2.53468	1.5439	1.58733	2.14853	1.14859	2.04672	1.84799	1.42626	1.29013
CNOT11	99.3032	112.865	112.096	97.356	107.365	102.823	98.7772	101.405	99.4427	93.9133	113.103	114.121	103.252	102.674	101.908	100.507	104.241	108.048
RNF149	59.9852	65.3381	54.6644	62.529	70.4505	66.813	69.9937	67.9437	67.3371	77.0154	64.6445	62.9919	65.0083	65.0203	60.6401	69.5678	65.9179	63.4743
CREG2	1.34421	1.55676	1.5141	2.39269	3.37862	3.19965	1.96492	1.93358	1.53641	2.46969	1.19528	1.79619	3.1921	3.24602	2.76069	1.31148	1.55028	1.41914
MAP4K4	78.132	70.2373	89.7498	105.278	104.862	107.27	121.294	129.55	116.131	64.082	89.0481	79.0323	91.7728	100.277	87.2474	84.2921	97.4816	71.6021
IL1R1	12.3779	11.5383	13.9924	19.0352	18.8953	23.4279	80.2432	73.6908	84.1846	15.2731	17.8793	14.1607	22.713	31.3615	28.2257	102.235	122.038	117.531
SLC9A4	0.224034	0.0915741	0.156631	0.903906	0.625671	0.759238	2.01803	2.25584	2.11918	0.259968	0.0996064	0.167087	0.245546	0.848959	0.380785	0.655738	1.17821	0.451545
SLC9A2	42.9586	45.3292	44.0656	52.5861	54.7462	61.4441	75.7823	78.5247	79.8932	46.2092	62.4034	51.8806	54.9409	72.9106	61.3064	77.4963	97.4196	86.4386
MFSD9	21.5633	17.8112	20.8842	29.8289	31.0333	27.9833	30.5891	33.0319	30.5162	17.7428	20.6683	18.7973	26.2734	28.8646	25.465	25.9314	32.5559	26.1896
TMEM182	5.09678	7.32592	5.4821	7.44393	7.38291	7.64661	4.83265	4.08199	4.76816	5.84927	5.12973	6.64172	9.0852	7.9902	8.75806	4.23249	5.58101	5.41854
MRPS9	46.8232	53.7082	49.2345	40.3567	49.428	42.1919	37.9177	36.0934	38.4102	54.2682	54.0365	52.1313	43.523	43.197	44.7423	38.2116	34.9743	43.9289
LINC01918	1.9603	1.78569	2.29726	2.12684	2.00215	2.06079	4.67333	2.95408	4.50326	2.20972	1.84272	1.67087	1.78021	1.39829	1.47554	3.63636	4.09274	4.57995
TGFBRAP1	68.7225	49.0379	58.7368	64.4963	61.566	64.5895	72.3304	65.473	73.7476	55.3081	60.2121	52.549	59.9132	61.6244	55.3091	66.8256	65.9179	68.5703
C2orf49	34.7253	40.842	32.9448	34.0826	33.3482	30.7491	28.8366	26.157	32.4235	37.8903	31.874	35.7149	33.0259	32.2105	36.603	34.3368	35.0983	30.8986
FHL2	11.5378	13.0035	12.4261	48.5451	52.4938	48.4828	15.4539	16.3817	14.8873	7.66905	5.92658	7.47716	20.9328	23.1716	19.5628	4.94784	5.39498	4.77347
NCK2	39.318	40.6131	42.7082	44.2914	53.4323	49.242	60.9126	72.8851	63.4166	33.9258	41.6355	39.3073	45.426	43.0972	39.9349	54.2474	53.0816	48.2508
UXS1	60.3212	66.9864	57.6926	70.9832	80.211	76.0865	61.125	61.6059	60.3967	48.159	57.3235	60.1932	63.2895	68.516	70.5881	44.8286	57.2984	53.0243
RGPD3	1.84828	1.69412	1.82737	1.91415	1.87701	2.38618	1.85871	1.5576	2.64898	1.75478	1.74311	1.75442	2.08714	2.69669	2.09432	2.08644	2.60447	2.12871
RGPD4	1.00815	0.961528	0.991999	1.32927	1.18877	1.46424	1.38076	0.859367	0.635755	1.23485	1.29488	1.0443	1.10496	0.998775	1.14236	0.894188	1.48827	1.09661
GCC2	43.9107	40.842	44.2223	55.1383	51.2424	52.7671	59.107	49.1451	55.9464	54.5282	44.6735	43.1085	62.737	53.1348	59.6881	66.1699	60.3369	56.5721
GCC2-AS1	1.17618	0.824167	1.30526	0.531709	0.625671	0.813469	0.477954	0.322263	0.741714	0.779903	0.846654	0.751893	0.798025	0.79902	0.951963	0.71535	1.05419	0.70957
LIMS1	94.9905	101.968	92.3603	73.9608	75.6436	76.0323	85.6069	82.6604	79.8402	98.7227	95.9209	90.9373	69.5509	75.9569	80.5361	83.5171	85.1414	87.4707
RANBP2	156.824	111.995	169.475	145.316	118.127	157.867	169.09	161.346	187.018	132.194	177.2	137.346	157.027	168.244	139.986	161.073	194.591	160.556
CCDC138	10.8097	17.1243	14.2013	7.92247	9.19736	8.13469	4.77954	3.81344	4.82114	10.9836	13.7955	14.286	8.6555	8.28983	8.94846	5.18629	5.519	5.41854
SEPTIN10	41.8384	40.3842	32.8404	41.8455	37.6654	36.5519	45.565	38.1881	42.3837	51.6686	41.5359	38.1795	50.5211	43.6465	44.8375	55.3204	50.7872	45.2835
SOWAHC	63.4017	50.732	57.6926	90.4969	79.8981	88.2885	116.302	105.648	101.244	74.2208	78.6392	63.2426	94.4125	103.523	86.6763	123.1	135.184	119.337
RGPD5	33.2131	40.1552	39.8888	40.9416	44.1098	43.8731	41.582	43.3981	44.7148	29.7013	43.1296	37.5529	37.5072	45.644	42.5528	37.3174	45.7023	36.7686
LINC01123	4.31266	4.53292	5.27326	6.11466	6.69468	6.29083	7.64727	10.0976	10.437	5.19935	5.47835	6.224	7.12084	7.0913	5.94977	5.90164	9.17766	7.80527
MALL	4.76073	2.56407	3.08042	8.08198	7.00751	5.2062	10.9398	10.7958	6.35755	6.56418	8.21753	6.30755	13.6892	10.3873	7.8061	14.9627	9.85978	8.32133
NPHP1	1.90429	2.38093	1.40968	1.86098	1.93958	1.19309	2.38977	1.39647	1.96024	2.20972	1.5937	2.38099	1.71882	1.29841	1.99912	2.20566	2.17039	1.80618
MTLN	23.4116	25.4576	22.8682	19.6201	19.3958	17.6252	16.0911	17.2411	13.4568	21.9673	22.013	26.1074	21.117	18.2276	16.8022	18.9568	18.1073	19.868
LINC01106	1.2882	1.51097	1.67074	2.60538	2.94065	2.33195	2.70841	3.11521	3.28473	2.20972	2.14154	1.87973	1.96437	2.39706	2.4751	4.05365	2.72849	2.70927
LIMS4	1.34421	1.37361	1.25305	0.957077	0.750805	0.542313	0.955908	0.698236	1.27151	1.29984	1.39449	1.08607	1.59605	0.948836	0.52358	0.9538	0.49609	0.516051
RGPD6	5.09678	6.22704	6.21305	6.69954	6.75724	6.34506	6.05409	6.1767	7.36416	3.96451	7.66969	6.47463	5.52479	7.69057	5.99737	5.42474	8.43353	5.93459
BUB1	95.6066	143.13	126.871	13.5586	15.2664	15.7271	2.92083	2.68552	3.70857	80.8499	114.697	121.89	12.3387	19.3263	18.9441	2.62295	4.77486	6.70867
MIR4435-2HG	25.3719	21.1078	20.9364	29.6694	30.7204	25.3802	65.108	64.6137	51.973	20.0175	16.1362	14.6619	13.9961	16.0303	15.4694	29.4486	26.7888	25.222
BCL2L11	95.2146	67.3527	70.9018	105.119	97.1041	90.2951	114.815	105.434	92.1315	85.7243	72.613	61.9476	94.2283	81.7997	72.6824	102.951	87.6839	76.8916
ANAPC1	132.964	120.969	141.229	104.747	94.664	100.924	86.2973	86.6887	93.297	101.322	140.096	123.979	98.0343	103.573	102.384	81.848	94.6911	85.729
MERTK	1.17618	1.09889	1.04421	0.265855	0.500536	0.325388	0.902802	1.23534	1.64237	0.454943	1.29488	1.29493	1.22773	0.649204	0.571178	1.01341	1.61229	1.22562
TMEM87B	92.5262	95.6491	92.8302	109.16	107.74	111.608	124.215	121.976	130.171	94.6932	104.786	98.122	114.056	124.098	124.041	148.852	150.625	156.428
ZC3H8	19.323	21.1536	18.4303	16.483	14.2027	13.829	11.524	12.8368	12.7151	23.3971	18.2778	18.5049	17.6793	13.9329	15.993	14.7243	13.7045	14.8365
ZC3H6	20.8352	17.5364	19.9444	15.6854	13.7648	16.4321	23.8446	17.8856	20.0263	27.6216	21.3656	19.9252	17.0041	15.0815	15.755	23.4277	21.2078	15.8686
RGPD8	14.2822	15.5218	16.133	17.1742	16.8305	16.8117	15.9318	16.0057	16.2647	13.2583	16.7339	15.7898	17.8635	19.576	17.2781	16.2146	16.495	15.0945
TTL	66.7062	71.1988	75.1309	44.5041	48.3018	54.5567	41.6351	47.6949	44.4499	46.4692	60.9093	65.8742	41.3131	43.5466	44.4567	30.5812	37.7648	35.672
POLR1B	70.1227	69.0011	69.6488	56.0422	61.566	60.6848	45.7243	48.8228	50.1717	60.8324	72.613	64.7881	57.1508	55.7816	57.3082	42.1461	52.0894	45.348
CHCHD5	36.7976	40.4757	34.3023	31.7962	32.9103	31.3457	32.5009	31.0984	28.8209	39.84	35.4101	41.5212	35.9725	31.6612	35.175	33.8003	36.4006	36.9622
SLC20A1	124.171	116.391	121.703	87.9979	73.3286	92.3559	91.3955	79.8137	87.4693	116.336	119.727	121.89	81.951	89.74	93.1496	107.66	107.279	100.694
CKAP2L	26.212	30.1279	30.4909	2.65855	1.93958	2.06079	0.159318	0.214842	1.05959	26.5167	29.3341	28.6137	2.08714	3.74541	2.85589	0.4769	0.620112	0.838583
IL1RN	2.46438	1.83148	2.34947	3.61562	2.06471	2.82003	1.48697	1.23534	1.05959	2.79465	1.84272	2.71517	1.90298	1.44822	2.04672	0.834575	0.620112	0.516051
PSD4	77.9079	55.677	63.4357	101.184	86.2174	94.1998	120.232	122.514	116.502	87.5441	74.3064	66.7932	97.2362	100.577	94.3396	143.964	134.006	146.107
PAX8-AS1	24.8118	25.9612	24.8522	25.2562	26.3407	26.953	36.8556	34.697	33.1652	29.4413	26.9435	25.5226	28.0536	24.6198	25.465	36.7213	36.7106	35.672
PAX8	5.15279	3.29667	4.02021	3.45611	3.87916	3.30811	3.82363	3.43747	4.18539	6.23922	4.38268	4.8873	3.56042	3.24602	3.56986	4.70939	3.96872	4.90249
CBWD2	52.7041	65.567	57.3793	63.0607	70.2628	65.9453	73.8174	84.9699	68.1847	56.088	49.7534	52.2566	58.9924	61.2249	68.9222	74.8733	73.1732	67.7962
RABL2A	8.5133	7.55486	8.51031	10.1556	9.8856	9.05663	10.3557	11.87	10.278	12.0885	8.86497	8.68854	11.2951	10.1875	10.2336	10.9687	11.8441	10.5145
SLC35F5	93.1983	109.248	89.0189	111.978	126.886	122.508	131.915	137.714	127.522	105.612	94.128	95.198	122.036	127.793	136.988	148.376	152.362	155.46
ACTR3	200.735	261.719	220.172	222.786	274.669	244.692	192.616	214.466	212.925	218.958	223.865	233.713	226.823	241.354	267.121	189.151	207.676	221.45
DDX18	155.536	170.099	149.061	109.479	112.934	115.404	106.69	106.776	104.476	141.617	150.007	155.099	111.908	107.268	110.38	96.6915	93.4509	94.7599
CCDC93	33.9412	36.2175	38.5835	37.964	38.2285	41.5412	37.3335	39.6383	42.1188	33.5358	40.3406	37.5947	36.9547	41.6489	38.3165	36.304	40.8654	36.2526
INSIG2	23.0195	24.3129	22.2939	28.1274	30.4076	27.4953	38.6612	40.4977	38.0923	21.9673	20.7679	19.8834	26.1507	27.1667	31.0816	39.0462	37.2067	38.9619
STEAP3	57.3528	37.8201	42.5515	38.8148	34.975	36.7688	55.9737	55.4292	53.1915	57.8428	51.2973	42.7326	43.0933	44.1459	37.2694	56.0954	57.7945	55.8625
C2orf76	10.0815	13.8277	10.8598	10.3152	9.94816	11.0632	10.8336	10.1513	11.4436	13.8433	11.3551	13.3252	11.6634	11.1363	12.1851	13.8301	14.1386	12.0627
DBI	165.785	203.844	169.162	154.302	184.26	170.286	144.501	153.612	159.469	173.918	170.925	181.081	168.69	186.172	198.532	174.188	201.102	215.838
TMEM37	2.40837	2.93037	2.71494	1.80781	1.87701	1.51848	2.86772	2.14842	2.49004	1.94976	3.53603	2.88226	1.28912	1.64798	1.42795	1.4307	1.61229	1.61266
TMEM177	18.0348	19.6426	18.0648	15.8449	15.1412	15.4559	12.4268	13.0516	11.8144	15.728	18.2778	17.9619	16.6971	14.2825	12.7563	11.2072	12.2162	13.4173
PTPN4	41.8384	42.353	42.3949	43.6002	42.483	42.2462	55.4427	50.0581	54.0392	44.9744	39.2947	39.6832	43.7686	42.8475	42.8384	53.7705	54.0738	47.0897
EPB41L5	198.438	216.756	192.239	213.96	211.539	227.392	304.51	301.101	321.003	211.419	195.029	193.905	176.548	191.515	204.958	200	205.319	199.841
TMEM185B	107.873	92.2151	99.722	84.4354	80.7115	82.6485	93.4135	84.4866	88.6348	99.2426	90.9904	88.974	78.6361	72.561	70.7785	80.5365	82.0408	82.9552
RALB	134.701	146.702	134.338	142.073	157.544	149.895	151.883	155.545	168.952	121.405	143.383	141.314	138.672	146.321	161.929	149.985	167.306	165.201
INHBB	61.7775	54.4866	74.0345	118.837	137.46	159.82	121.135	129.388	151.31	47.1191	50.2514	41.9389	62.3073	86.9933	74.1104	71.1774	94.6911	90.6315
CLASP1	72.083	54.3034	78.4201	69.3881	63.5056	72.9411	61.2312	57.8462	64.847	63.3671	71.7664	60.5692	63.1667	65.8692	60.2593	48.763	52.7715	52.4437
NIFK-AS1	4.98476	6.59333	5.74315	3.50928	4.5674	3.25388	4.72644	4.51168	6.30457	7.08412	4.93052	4.72022	5.09508	6.04259	5.71178	4.59016	4.89889	5.48304
NIFK	57.4088	71.2446	61.7128	54.2875	63.1302	54.9363	44.9808	47.6949	47.0459	60.8974	60.8595	62.3236	54.0201	53.5843	56.4038	43.1595	42.7257	42.4452
TSN	143.214	182.324	136.583	102.407	114.811	110.74	109.611	114.296	112.582	164.495	136.013	150.671	109.207	109.466	122.803	123.279	113.481	115.789
BIN1	2.35236	2.79301	2.29726	5.47661	7.82088	5.58582	4.67333	4.29684	4.82114	1.68979	2.78898	3.29998	4.48122	5.64308	4.23624	3.51714	3.96872	4.25742
ERCC3	91.9101	92.3982	85.8862	82.8935	83.5896	84.3839	88.8464	83.1438	83.5488	85.9193	87.8528	90.9791	87.2916	83.9471	86.8191	88.465	84.8934	84.6969
MAP3K2	105.296	101.235	105.935	107.139	102.172	112.313	114.231	107.743	111.363	95.9931	116.041	108.983	113.995	118.804	116.711	115.469	120.302	104.178
MAP3K2-DT	1.9603	3.47981	2.55831	2.76489	2.56525	2.44041	2.01803	1.77245	2.0662	3.11961	2.34075	2.21391	2.51685	1.7978	2.99868	2.20566	2.10838	2.19322
IWS1	68.7225	79.7152	76.8538	71.7808	73.704	72.5615	53.3715	55.6977	59.814	53.4883	71.866	75.1893	66.9113	70.8631	75.6811	50.3726	52.7715	52.3792
WDR33	114.314	95.6491	108.285	109.692	95.9779	93.1151	104.884	98.505	102.092	103.532	111.758	102.759	101.472	101.575	95.5771	104.083	102.567	101.469
SFT2D3	28.9004	24.9997	21.7196	23.8737	21.8359	22.8856	31.5981	31.0446	29.1388	30.2862	24.1047	24.3948	24.3091	21.0242	21.4668	33.9791	27.2229	30.705
POLR2D	120.082	133.698	121.755	76.6725	85.0286	76.9	71.5338	71.9183	71.0456	102.622	106.579	111.489	79.8639	76.7559	74.8719	64.3219	65.7939	69.0864
AMMECR1L	76.0596	68.5432	71.5806	81.7237	80.7741	85.4143	118.373	119.721	108.608	65.0569	67.1845	62.1983	71.8222	77.505	72.016	98.2414	93.699	90.8895
SAP130	80.2603	72.5724	87.7658	66.7827	59.9392	70.0668	62.2934	72.2943	62.9397	53.8133	91.3888	76.7766	59.1766	72.2114	58.3554	60.8048	68.6464	62.5712
UGGT1	172.17	118.451	178.612	174.932	133.018	184.224	143.864	125.575	150.356	131.674	175.855	141.398	158.316	170.441	139.701	127.809	157.757	136.108
HS6ST1	117.73	95.6949	124	148.613	160.422	172.672	152.255	181.971	168.263	86.6992	117.336	102.633	135.848	163.4	148.221	127.213	162.283	147.913
RAB6C	4.92875	5.3113	3.86358	3.08391	3.25349	3.19965	5.36371	4.29684	4.18539	7.60405	4.38268	5.01262	3.31487	2.89645	3.33187	4.70939	4.71285	5.16051
CCDC74B	12.0979	13.4614	11.904	10.8469	9.38506	7.48392	5.62924	5.47847	4.45029	10.5287	9.26339	10.443	9.33075	5.39339	6.99693	5.36513	3.59665	3.22532
SMPD4	191.493	167.214	198.661	88.2637	84.9661	94.6336	92.5107	87.8703	92.9792	144.997	187.808	178.24	86.3094	91.0384	83.7252	86.4382	90.9084	93.7278
MZT2B	195.862	198.716	187.122	103.63	115.311	115.458	117.948	118.056	113.376	204.53	182.18	197.121	122.589	111.913	111.189	122.623	125.387	138.044
TUBA3E	0.616094	0.686805	0.574315	5.37026	2.94065	2.7658	0	0	0	0.779903	0.448229	1.00252	4.60399	4.24479	4.61702	0.0596125	0	0
CCDC115	42.6785	42.994	40.8286	37.4323	34.3493	33.5149	46.4147	43.3981	44.9797	44.6494	39.2449	42.6908	38.7963	37.2543	39.7921	54.1878	46.8805	51.1536
IMP4	112.073	131.821	121.389	89.3803	98.1677	95.3928	81.9957	86.7424	89.6944	96.318	115.992	121.848	89.9926	97.2308	94.4348	81.073	89.9783	85.4065
PTPN18	92.3581	75.7775	88.7056	62.1568	59.1884	60.034	76.4196	77.6653	75.8668	88.649	87.2552	82.1652	62.3687	66.9179	62.9724	80.3577	81.2347	83.6648
ARHGEF4	4.14463	3.38824	5.4821	2.49903	2.18985	1.78963	1.91182	1.93358	2.11918	3.50956	4.6317	4.21896	3.68319	2.19731	2.28471	1.13264	1.86034	1.87069
FAM168B	279.315	205.63	271.964	283.242	243.198	268.336	301.748	285.847	290.911	237.935	261.815	223.312	256.043	250.942	228.09	278.331	271.485	254.349
PLEKHB2	182.7	198.853	181.588	309.827	322.283	304.78	280.665	304.592	289.427	161.57	183.575	180.663	268.505	295.238	285.875	277.437	281.097	281.441
POTEE	0.952146	0.915741	0.730947	1.01025	1.12621	1.03039	0.477954	1.0205	0.741714	1.10486	0.796851	1.12784	0.798025	0.998775	0.761571	0.774963	0.620112	0.322532
RAB6D	6.60901	7.96694	8.35368	6.64637	7.25778	6.29083	8.70939	6.6601	7.57608	7.86402	7.22146	6.30755	7.61193	7.29106	8.42488	8.52459	7.68939	8.45034
MZT2A	127.251	139.422	127.916	79.012	77.2077	78.4185	71.2152	71.4349	70.8337	122.835	115.842	127.655	78.5747	69.4648	73.0632	64.5604	62.2593	74.2469
TUBA3D	1.12017	1.19046	1.67074	9.35808	4.5674	6.07391	0	0	0	0.974879	0.547835	1.46201	10.006	7.04137	7.66331	0.0596125	0	0
CCDC74A	56.4566	63.2319	60.0943	56.7334	53.3071	42.9512	31.3325	32.1726	25.0064	49.1339	49.3052	51.8806	46.8993	40.7001	39.0781	25.0969	21.5799	24.7705
LINC01087	0.952146	0.869954	1.82737	3.56245	3.06579	3.14542	1.11523	1.28905	1.32449	1.03987	1.4941	1.0443	4.23567	1.7978	2.76069	2.32489	0.682123	1.61266
C2orf27A	18.8189	21.6573	16.4463	20.6835	22.5867	21.4214	20.7113	19.8729	18.5429	14.3632	16.3354	16.5416	22.713	17.7283	21.9428	16.6915	13.7665	14.3849
GPR39	7.95322	8.88268	7.15284	13.3991	17.6439	16.5405	10.8867	11.1181	11.8674	8.059	8.96457	7.85311	12.6456	15.7806	12.4707	12.3994	13.4564	12.9013
LYPD1	6.77704	7.7838	5.63873	60.4553	79.5853	62.1491	29.4738	45.3853	26.7547	9.48882	9.21359	7.51893	49.7845	62.4235	50.4541	25.1565	26.3548	20.4485
NCKAP5	9.40944	5.86074	8.56252	12.0166	11.1369	13.4494	12.1082	12.9442	13.1389	5.97926	5.72737	4.0101	9.33075	9.03892	8.94846	6.14009	8.43353	7.41824
MGAT5	112.409	97.2974	125.357	131.066	128.325	142.791	117.311	111.557	119.31	91.9636	125.255	111.28	126.395	139.529	124.993	104.56	125.883	119.079
TMEM163	1.17618	0.641018	0.365473	1.80781	1.31391	1.08463	1.00901	1.23534	0.900653	0.974879	0.846654	0.668349	1.71882	1.5481	1.28515	1.31148	0.744135	0.774077
CCNT2-AS1	6.83305	7.37171	7.36168	8.02881	8.88452	8.18893	11.3116	12.8905	12.3972	7.2141	6.42461	6.43286	9.5763	10.1376	9.71003	11.8033	10.6039	9.0954
CCNT2	45.423	52.7009	45.9452	52.3734	46.9253	51.1401	52.6812	51.0786	52.1849	54.0733	45.5699	48.7895	52.8538	52.4856	56.6418	56.9896	56.8023	51.9922
RAB3GAP1	74.4914	65.6586	75.1831	79.2779	77.3954	79.3946	80.9867	75.1946	79.6283	82.8647	78.8384	70.8033	83.9768	92.0371	85.9623	79.2847	84.8934	83.0197
ZRANB3	17.4187	20.9247	20.1532	17.0147	19.9589	19.4148	12.7985	14.8241	15.629	17.7428	17.4311	20.0923	17.9862	20.0754	20.9908	14.1878	15.2548	14.901
R3HDM1	87.3174	85.7133	97.9469	88.1574	89.3458	94.6336	63.4617	62.3041	66.1185	81.3049	96.7178	91.731	82.9946	98.1796	91.0553	64.6796	64.3676	67.2802
UBXN4	221.066	250.547	221.947	245.331	260.529	246.156	252.838	260.227	256.315	231.371	225.608	228.743	253.526	241.404	264.979	270.7	254.246	255.252
MCM6	293.149	336.535	284.443	97.2496	103.548	99.189	45.2463	41.6256	46.0922	223.702	272.822	276.571	93.4303	102.524	109.476	48.8227	52.6475	58.8943
CXCR4	60.1532	60.9425	54.0901	25.8942	14.3904	25.4887	108.708	90.8781	85.721	60.4425	64.0469	52.4237	29.4041	22.4724	30.0344	129.419	114.163	107.468
HNMT	5.76888	6.68491	3.39368	7.4971	10.6364	7.32122	8.92181	7.08978	7.94694	7.99401	4.43248	5.76451	11.5407	9.93781	10.0908	9.77645	8.49554	7.80527
SPOPL	125.067	131.958	121.65	108.575	106.739	113.994	121.613	111.718	136.475	114.776	127.446	126.527	107.611	113.061	125.374	130.611	137.479	137.786
KYNU	226.163	227.378	187.279	169.775	172.122	182.217	265.371	269.841	252.236	267.182	235.42	232.418	171.207	189.218	198.818	292.817	285.686	275.636
GTDC1	20.5551	22.2525	19.3701	19.301	20.084	20.2283	19.3837	24.8142	21.1389	19.1726	21.8138	20.51	23.5724	24.6697	27.8449	27.839	27.781	26.9637
ACVR2A	9.52146	10.4394	8.35368	11.3254	12.2631	11.9309	12.4799	12.622	11.7085	10.3337	9.96064	8.64677	10.8654	12.1351	11.8519	13.9493	11.4101	11.4821
ORC4	49.8476	61.9956	43.5435	41.4202	44.2975	45.5543	45.4056	47.6949	43.9201	51.3436	46.6158	50.4186	48.6795	49.0898	52.596	52.8763	49.795	50.444
MBD5	39.262	32.9209	37.1217	50.8314	41.6697	47.5066	45.6181	39.7457	43.2843	41.3349	38.8465	38.4719	49.9686	49.1397	54.0239	45.9613	44.7101	46.0576
EPC2	43.7427	37.3164	35.8164	45.2485	35.2878	39.3719	56.8234	49.1451	53.1385	45.6243	39.0955	36.3415	43.0319	39.5016	38.6497	52.0417	47.6866	45.735
LYPD6B	29.2925	40.4299	28.2981	28.0743	30.2199	29.1764	32.6602	35.5563	38.0923	41.2049	35.0116	37.7617	35.4814	37.5539	34.9847	39.8808	43.7799	47.4767
LYPD6	26.38	37.8201	33.1537	11.5913	17.0808	17.4625	11.3116	12.4071	12.2383	18.8477	25.549	29.6998	11.6634	12.9341	15.4694	8.04769	8.68157	8.57935
MMADHC	127.7	176.875	125.671	138.723	149.285	138.344	140.147	136.425	139.018	149.481	136.212	147.831	143.583	148.118	166.974	164.054	149.261	158.75
RND3	25.2039	33.8824	31.2741	52.4265	70.1377	63.6133	50.0259	62.9487	61.2974	32.6909	28.9855	30.4934	33.7626	46.2932	39.2209	30.9389	37.9509	34.2529
RBM43	10.3056	10.1189	10.0244	7.76296	7.50805	6.61622	12.8517	10.3124	11.9204	13.1284	10.0602	10.067	8.71688	9.88787	8.71047	13.4128	11.5341	14.7075
NMI	5.32081	5.76917	5.32547	4.9449	4.7551	5.2062	6.31962	4.99507	7.04628	6.62917	6.72343	6.72527	5.64756	6.49204	6.56855	9.18033	8.74358	8.45034
RIF1	133.132	106.867	130.004	74.5988	66.1959	73.5919	71.9055	64.184	72.4761	104.832	124.309	103.97	74.0935	75.807	69.3029	66.1103	64.2436	59.1524
ARL5A	94.7665	105.264	91.0029	93.953	94.3511	89.4816	93.9445	95.5509	95.893	79.0302	87.554	90.6867	94.4125	86.3441	104.002	94.8435	92.3347	97.4692
STAM2	49.3436	57.5543	46.885	58.169	54.1831	56.8344	72.8615	66.1176	67.2311	49.9788	54.5345	51.0452	57.6419	53.3346	66.5422	78.5097	73.0492	75.0209
FMNL2	18.5388	18.0401	20.2055	14.941	15.5166	15.9982	19.2775	19.6043	21.5097	12.7384	14.2935	15.748	10.1288	10.8367	11.8043	13.532	11.5341	13.3528
PRPF40A	180.348	174.723	182.58	169.296	167.242	158.627	157.831	155.975	163.283	150.261	180.686	173.437	155.615	156.358	166.879	154.814	155.276	146.946
ARL6IP6	42.8466	47.2522	36.3907	9.57077	9.63533	11.3343	11.3647	11.6015	11.8674	33.0809	31.9238	37.2187	10.3129	11.1863	13.4703	11.3264	11.3481	10.5145
RPRM	14.2822	11.8588	11.173	10.4215	8.88452	13.3409	35.1031	33.5153	30.7282	18.9126	18.2778	14.0353	12.0318	13.7831	12.6135	50.0149	47.0665	50.444
KCNJ3	21.8433	21.6573	20.3621	28.925	27.7172	31.3999	51.7253	54.355	49.7478	4.28947	5.97638	5.6392	5.70895	5.84284	6.66374	9.00149	10.4179	10.9661
NR4A2	35.8455	36.126	44.3267	59.711	37.1023	70.2838	72.3835	54.5161	85.721	68.8914	66.6367	58.5641	74.8915	73.8594	71.4449	146.766	143.494	161.46
GPD2	283.347	299.447	290.812	175.358	147.783	185.634	174.666	151.141	191.203	299.613	322.924	322.813	176.548	195.61	220.618	239.344	260.881	268.024
ACVR1C	1.06416	1.0531	1.30526	2.44586	3.12835	2.33195	2.12424	2.09471	2.96686	0.844895	0.996064	1.16961	2.20991	2.54688	2.14192	1.60954	2.54246	1.54815
ACVR1	25.988	22.0693	24.4867	35.4118	37.8531	35.8469	39.086	39.6383	33.9599	27.6866	23.7561	22.0555	34.9289	34.2081	31.0816	36.7213	32.3699	28.3183
CCDC148	1.00815	1.00731	0.522105	2.49903	1.50161	1.30155	1.85871	1.66502	1.74833	1.29984	0.796851	1.21138	2.51685	1.5481	2.04672	1.37109	2.2324	1.48365
PKP4	148.031	139.513	158.407	172.752	170.871	171.913	164.947	178.158	176.422	141.162	157.926	149.877	175.074	177.782	174.495	161.61	185.724	163.588
TANC1	64.8579	48.0306	62.3393	63.9646	54.3082	63.4506	57.9387	53.5493	59.1252	51.8635	63.8975	56.7679	63.1667	61.4247	56.5466	49.0611	57.1743	46.9607
WDSUB1	17.1386	19.2306	15.872	12.8142	13.3268	14.3713	15.8787	17.1873	21.2448	18.3277	17.3315	17.5859	15.3466	14.5322	16.3262	24.918	26.1687	25.093
BAZ2B	43.2946	30.8605	35.7642	44.0787	30.7204	36.8773	48.8044	40.2291	46.0393	48.419	36.6551	34.1694	39.9012	32.0607	35.9366	52.3398	39.3771	38.5103
CD302	40.1021	42.9024	35.1899	36.2626	35.413	35.9011	42.0069	38.7252	38.834	51.9935	38.6971	40.4769	45.3646	39.2519	45.4087	58.1818	49.981	55.8625
PLA2R1	19.0429	14.2398	15.2455	21.2152	16.3926	19.5233	35.3686	30.4538	33.1122	19.9525	16.9331	15.372	21.117	17.5784	22.7043	39.3443	32.6179	32.8983
ITGB6	50.5757	31.2268	26.8884	117.189	123.57	95.3386	286.613	285.632	229.772	51.1486	31.376	26.5669	73.4183	75.6073	57.689	170.194	155.772	118.111
RBMS1	46.4311	43.0398	43.8046	60.8275	62.0665	64.5895	77.5348	76.7522	84.1846	36.2005	48.7075	44.6541	58.8697	63.9716	61.2112	69.8063	74.2894	67.7317
TANK	51.8079	62.133	38.949	91.9857	90.9725	76.5746	79.2873	77.9339	66.1715	74.4157	54.8333	57.478	104.91	93.3855	106.43	94.1282	84.6453	74.1824
LINC01806	7.33712	7.14278	6.05642	6.91222	6.069	5.04351	8.39075	6.82123	7.73502	10.7237	5.92658	5.47211	6.50697	5.39339	7.28252	8.28614	8.61956	7.61175
PSMD14	169.314	241.618	184.668	141.488	165.114	147.889	110.195	115.263	118.727	181.002	188.555	203.136	150.397	161.802	184.253	120.358	120.364	122.498
SLC4A10	22.0674	32.5088	25.1655	19.4074	13.8273	15.6186	0.743484	0.483394	0.582775	32.5609	30.629	28.4466	28.8517	23.3214	30.7008	1.66915	1.30224	1.9997
DPP4	0.728111	1.00731	0.835368	0.478538	0.312835	0.705007	0.743484	0.537105	1.27151	0.389951	0.896457	0.793665	0.736638	0.998775	0.666374	0.596125	1.36425	1.29013
IFIH1	5.2088	4.62449	5.4821	4.62587	5.44333	6.12814	3.18636	3.81344	4.87412	5.84927	6.62382	6.43286	4.5426	6.04259	6.56855	6.02086	6.0771	7.80527
GCA	20.3311	25.8239	20.9886	20.8962	27.5921	22.8856	21.5079	21.8064	20.5561	26.2567	23.3079	26.4416	29.22	25.5187	29.7489	24.0238	21.7659	23.9964
GRB14	1.51223	2.79301	2.66273	4.89173	6.13157	5.64005	7.70037	7.6806	7.2582	2.66467	3.03799	2.50631	4.17428	4.69424	5.093	8.04769	9.61174	9.15991
COBLL1	51.5839	43.3145	46.0496	78.2144	74.7051	77.6592	64.2052	65.5268	61.2974	62.1323	53.3392	44.863	68.0776	75.3077	69.2553	56.7511	62.3833	53.0888
GALNT3	96.6148	119.504	109.694	88.8486	104.988	103.961	102.123	111.395	116.82	94.8232	117.287	119.76	104.05	123.199	124.231	110.999	128.797	123.852
TTC21B	24.5878	26.007	22.816	17.2806	17.5188	20.4994	15.9849	15.576	15.4171	21.0574	23.4075	24.6036	20.1962	18.2276	21.086	15.5589	16.0609	15.4815
STK39	63.4577	69.0926	69.2833	61.1997	61.6286	61.2814	60.2222	59.3501	63.3106	52.1235	58.5685	66.7096	57.7033	55.7816	62.4964	51.5648	48.3067	53.7983
CERS6	208.296	229.118	221.477	181.419	174.187	196.263	186.668	190.941	198.515	193.481	216.843	214.749	185.08	187.17	205.243	182.057	193.475	212.613
LRP2	3.58455	2.93037	3.968	1.70147	0.938506	3.25388	9.87772	10.0439	15.8409	3.11961	4.48229	2.71517	0.920798	1.59804	1.85633	7.39195	11.9062	10.3855
BBS5	14.2822	10.3021	13.4181	15.7918	13.9525	14.9678	15.2414	16.9188	17.1124	15.923	11.1559	12.1974	16.2674	15.3811	12.3755	16.6915	17.4872	16.9007
FASTKD1	20.1071	26.6023	25.9486	15.4196	12.8888	17.2456	15.4007	14.663	16.9535	16.7679	18.9252	22.5568	13.0753	13.2338	16.231	18.003	18.6654	25.222
PPIG	118.794	122.206	125.775	95.7077	92.5992	93.0609	106.956	96.2491	102.674	111.006	123.91	111.364	99.2006	90.1395	110.999	121.61	104.737	109.854
PHOSPHO2	1.68026	2.79301	2.03621	1.75464	2.18985	1.7354	2.76151	3.11521	3.60261	2.53468	1.94232	2.21391	2.14853	2.39706	2.28471	5.18629	3.59665	4.45094
KLHL23	23.5796	31.2725	23.6513	11.9635	14.2027	13.4494	20.0741	20.9471	20.1322	18.7827	22.7601	21.429	12.2773	11.4859	13.4227	20.924	17.4872	19.4164
SSB	188.805	239.832	207.902	179.399	195.647	174.571	155.123	151.517	153.164	199.33	196.374	199.377	176.609	169.093	200.15	166.14	138.409	151.461
METTL5	33.9972	46.8401	38.0092	25.4689	26.7161	27.5495	21.9328	23.6326	23.2051	35.1606	33.2685	42.5237	28.3606	24.8196	32.9855	23.845	21.0218	24.8995
UBR3	81.9966	78.4332	96.8504	105.225	101.421	111.933	99.0427	98.881	106.118	75.6506	103.74	85.4652	109.022	121.301	115.521	96.9896	119.062	114.112
ERICH2	0.840129	1.19046	0.991999	2.0205	2.56525	1.7354	1.43386	1.61131	1.85429	1.16985	1.4941	1.16961	1.96437	2.69669	2.5703	1.66915	2.48045	1.80618
GAD1	1.23219	1.32782	0.991999	1.75464	1.87701	2.16925	0.690378	0.644526	0.688735	1.16985	0.946261	1.21138	1.65744	1.69792	1.71353	1.13264	1.24022	0.838583
GORASP2	156.096	158.286	148.904	171.104	172.247	164.158	155.972	160.809	153.217	134.403	162.159	154.598	176.179	183.875	177.97	175.022	171.647	170.748
TLK1	85.2451	79.0284	77.898	85.233	78.8971	80.425	90.8113	87.1184	92.3434	86.6992	79.4859	78.6564	88.2738	83.8971	90.0557	91.5052	93.947	91.1475
METTL8	21.1712	26.9228	26.1052	14.941	17.6439	17.4625	12.1082	11.2792	14.7813	18.7177	23.1087	25.3973	16.206	18.2776	20.4196	11.386	13.0844	12.1917
DCAF17	25.876	29.67	27.9326	19.5669	20.084	21.2044	18.1623	18.0467	19.2846	23.6571	25.8977	26.9846	20.7486	20.3251	22.6567	19.3741	19.3475	19.6745
DYNC1I2	85.189	107.6	95.4408	113.467	122.131	115.187	116.037	119.13	114.012	74.5457	88.1018	94.279	103.682	110.015	115.521	101.699	96.6755	96.5661
SLC25A12	16.4665	16.1628	14.6711	13.8776	13.7022	13.5036	8.8687	9.2382	10.7549	16.313	16.4849	15.1214	13.9961	13.2837	13.8511	10.7303	12.5263	12.1272
HAT1	150.719	187.773	147.599	114.371	129.013	112.855	81.3053	84.0569	85.1912	141.877	159.071	161.824	114.486	121.851	132.228	99.6721	98.9079	94.7599
METAP1D	7.05708	6.77648	5.95199	4.89173	4.69253	4.66389	2.70841	3.16892	3.01984	8.31896	5.77717	6.9759	5.77033	4.94394	4.66462	3.51714	2.72849	2.77378
DLX1	10.9217	9.56949	8.40589	7.65661	5.94387	7.64661	7.0631	8.96965	7.09926	15.0131	12.65	9.73284	6.3842	8.33977	7.04453	12.8167	12.3402	13.5463
DLX2	1.9603	1.55676	1.67074	1.96732	2.56525	1.95233	2.49598	2.95408	2.11918	5.6543	3.1376	2.25568	2.57823	3.3459	2.7131	5.66319	4.9609	5.35403
ITGA6	11.8738	13.3698	15.872	24.6713	23.6503	22.9398	18.6402	20.7859	17.5892	11.5036	13.6959	12.3645	16.8813	19.8756	15.3742	12.6379	15.1307	12.2562
PDK1	37.4137	43.864	30.8042	35.784	37.1648	30.8576	25.2785	23.7937	23.9468	39.0601	32.5713	37.7617	38.7349	36.5052	37.3646	25.5738	24.3084	26.1251
RAPGEF4	9.8015	5.67759	5.84757	3.56245	2.87808	2.87426	6.79757	6.28412	5.93371	10.7887	6.42461	6.18223	1.8416	1.34835	1.66594	5.30551	4.58883	3.74137
MAP3K20	408.134	318.128	352.16	287.07	245.576	295.181	293.942	236.487	289.322	427.127	339.608	331.877	229.279	231.316	239.228	236.244	236.945	232.417
CDCA7	40.7182	46.5196	39.7844	8.02881	7.82088	8.46008	0.955908	0.590815	1.85429	29.0514	31.5752	34.6289	5.77033	6.49204	6.52095	0.655738	2.17039	2.0642
SP3	177.435	178.615	169.214	135.905	137.585	129.83	162.717	151.625	162.806	186.787	171.572	175.024	142.355	144.872	148.459	183.428	174.376	167.781
OLA1	171.61	218.404	163.523	174.932	209.475	181.838	179.923	185.999	179.071	199.59	173.564	186.261	189.255	192.214	209.432	197.854	185.103	181.392
CIR1	33.7172	32.463	31.5873	32.0621	35.9135	29.3934	40.5199	39.2086	40.6883	48.419	30.9776	30.9947	37.4458	32.2604	37.079	44.4709	35.5944	38.0588
SCRN3	21.3953	22.6188	18.3259	24.1396	23.4626	22.1806	24.0039	22.9881	25.6951	25.2819	20.3197	21.2619	29.4655	24.8695	29.6061	25.7526	24.6185	28.1248
GPR155	2.68841	2.79301	3.28926	7.44393	7.38291	6.01967	4.35469	4.18942	5.82775	2.07974	2.19134	2.88226	5.95449	6.69179	5.75938	4.41133	5.27095	4.32193
WIPF1	81.7725	72.2061	81.7094	56.6802	58.8756	55.804	60.4346	56.1811	50.5425	59.0127	61.0587	58.8983	41.0062	41.0497	39.6493	29.389	25.6726	24.706
CHN1	40.7742	49.8621	46.3107	18.6098	20.8974	21.4756	19.5961	21.4305	19.0727	36.6554	39.1453	42.649	18.2932	18.9268	20.2292	18.4203	18.2313	19.1584
ATF2	40.5502	55.7228	50.592	51.0973	54.1831	53.7974	52.7343	55.4292	54.0392	48.289	52.5424	53.1755	57.0895	59.8766	63.5912	54.4858	58.5386	59.6039
ATP5MC3	202.135	241.298	198.556	191.096	202.279	193.66	146.254	145.555	150.409	197.835	208.327	216.462	206.995	196.659	203.006	160.715	167.182	179.005
LNPK	50.4637	61.6293	51.9494	42.3772	43.7344	49.1878	26.3406	28.5203	30.1984	42.0498	57.6223	58.4388	46.2854	51.2871	56.6894	29.0909	33.238	38.1233
HOXD8	2.07232	2.93037	2.5061	1.70147	1.37648	2.16925	1.54007	2.25584	2.0662	2.92464	2.98819	2.6734	2.33269	2.24724	1.99912	2.74218	2.66648	3.67686
HAGLR	12.4339	10.9431	12.0084	7.8693	8.63425	8.78547	10.6743	12.1923	11.5495	14.6232	11.903	12.6569	11.6634	9.93781	11.3284	11.6244	9.54973	13.1593
HAGLROS	3.75257	4.07505	3.81136	2.07367	1.93958	2.82003	1.96492	2.73923	2.43706	4.15948	3.98426	5.22148	2.57823	2.09743	2.28471	2.92101	2.72849	3.28983
MTX2	43.9667	53.8455	48.6602	43.3343	44.6103	43.9816	40.573	39.9069	37.9334	46.5342	48.3589	53.0085	42.3567	42.9473	49.1689	41.6095	44.4	41.1551
LINC01117	2.07232	2.06042	1.984	1.70147	1.12621	1.41001	2.38977	3.22263	2.49004	2.53468	1.84272	1.83796	2.02575	1.34835	1.71353	3.87481	2.41844	3.28983
LINC01116	3.69657	3.34245	4.17684	3.56245	3.75402	3.6335	3.82363	4.08199	3.23175	3.57456	3.68544	3.13289	4.1129	3.49571	3.18908	2.20566	2.66648	3.80588
HNRNPA3	465.711	485.114	532.129	362.254	421.014	395.834	351.88	366.95	365.347	432.586	495.641	453.016	358.804	390.671	399.158	328.525	352.038	325.886
NFE2L2	95.8307	105.035	96.5894	85.0735	91.7859	90.6747	93.9976	108.119	93.456	108.796	106.031	100.837	84.7134	90.3892	84.7247	82.3249	90.1643	82.1811
TTC30B	5.8809	5.9981	5.58652	8.24149	8.13372	6.77891	8.76249	5.85444	6.72841	8.96888	6.37481	5.51388	9.76046	8.8891	8.37728	8.16692	6.44917	7.99879
TTC30A	5.26481	5.58602	5.27326	7.8693	6.50697	5.26044	7.48795	6.6601	7.41714	6.95413	4.83091	5.01262	8.83966	8.43965	7.7585	9.65723	8.06146	8.90188
PDE11A	0.448069	0.183148	0.261052	1.22293	1.12621	1.03039	0.690378	0.644526	0.423837	0.0649919	0.398426	0.375947	1.28912	1.49816	0.999562	1.07303	0.992179	1.22562
RBM45	15.1783	17.5364	13.9402	17.2274	17.0808	17.0829	14.4979	14.9852	14.9932	14.5582	15.8872	16.667	19.0912	15.6308	17.8017	16.0954	14.8827	16.6427
OSBPL6	21.9554	22.7562	22.7638	14.7283	11.1369	12.202	11.6833	11.7089	12.874	32.8209	19.1742	20.3847	12.707	12.5846	13.3275	10.7303	10.852	12.6433
CHROMR	3.80858	3.02194	3.81136	1.96732	2.31498	1.78963	1.27454	1.18163	1.90727	3.37958	1.84272	2.25568	2.20991	1.7978	2.7131	0.774963	1.61229	1.74167
PRKRA	54.4403	72.2061	57.9536	37.6982	38.6039	38.1788	30.6422	33.8376	34.6486	53.1634	60.2121	65.2058	38.5507	40.7001	48.9785	35.4098	36.4626	39.2199
FKBP7	1.23219	2.28935	1.56631	2.0205	2.06471	2.06079	0.637272	0.913078	1.32449	2.20972	1.09567	1.75442	2.08714	1.74786	2.33231	0.417288	0.682123	1.0321
PLEKHA3	26.7721	25.0455	23.8602	28.3933	34.7873	31.9965	38.6612	37.7585	34.8606	25.6718	27.2921	27.9036	29.22	31.9608	32.7475	37.4367	38.0129	35.3495
TTN-AS1	7.89721	7.96694	8.24926	8.66686	8.82196	8.73124	7.59416	7.25091	9.69526	8.90389	7.61989	7.5607	8.71688	9.58824	8.61527	8.34575	7.68939	8.38583
SESTD1	62.2255	50.732	50.4875	58.3817	48.0515	51.7367	64.63	53.5493	54.9398	44.5195	48.4585	48.8313	49.9686	44.5454	44.4567	48.1669	40.6173	40.7035
CWC22	30.1886	35.7597	30.021	25.6284	26.9664	24.621	23.8977	22.451	22.0395	31.7161	30.8282	31.5377	28.4833	24.2702	29.4633	27.0045	23.5643	23.0288
UBE2E3	44.1908	45.4665	45.4753	40.1972	41.7322	38.0161	35.581	37.8659	35.9731	42.7647	48.2593	51.087	43.5844	40.5503	41.8388	33.1446	33.9821	32.8338
ITPRID2	64.2978	76.1896	75.1309	69.4412	68.4484	69.2534	65.3735	61.2836	67.39	63.1071	77.3942	81.6639	71.3925	71.2127	83.3444	74.158	81.4827	75.9885
DNAJC10	140.694	173.991	165.298	133.672	141.214	142.411	115.984	104.843	121.535	165.534	154.888	168.8	136.033	152.064	170.877	127.809	132.766	141.914
NCKAP1	296.957	285.07	295.094	320.727	311.209	331.841	283.002	274.299	290.646	300.458	310.224	296.831	316.386	331.294	326.285	268.137	283.577	267.831
DUSP19	2.91245	2.70143	3.08042	1.43562	1.31391	2.33195	1.48697	1.0205	1.05959	2.46969	2.83878	3.21643	2.14853	2.04749	2.76069	1.60954	1.24022	1.22562
NUP35	29.7406	36.5838	28.9246	21.162	20.5846	17.7336	12.6392	12.5682	14.1985	24.6969	28.9855	29.2403	19.3981	19.9755	19.7532	15.6185	12.2782	14.772
ZC3H15	132.348	171.839	139.976	130.481	145.531	136.826	104.831	107.958	110.621	132.129	143.483	146.41	132.595	137.581	154.17	118.271	116.023	120.885
ITGAV	147.807	147.846	143.474	255.114	248.454	258.358	297.075	263.45	283.388	142.137	137.756	134.213	227.56	243.701	250.033	249.657	278.306	253.188
FAM171B	44.8629	51.0525	40.5153	57.1588	49.8034	56.1294	88.7402	77.4505	80.5819	55.5031	39.3445	44.5705	54.2043	51.1872	67.0658	90.9091	88.614	90.8895
TFPI	15.4024	18.8643	15.2977	31.3708	35.6632	34.1115	76.7913	75.8929	67.8139	11.1136	7.12186	8.18728	8.34857	8.48959	10.9	20.6855	21.952	19.6745
GULP1	1.06416	2.60986	2.34947	1.86098	2.25241	2.54887	3.34568	3.86715	5.03306	1.68979	0.946261	1.08607	0.920798	1.04871	1.09476	2.14605	1.6743	1.48365
COL3A1	1.23219	0.549444	1.40968	1.54196	2.18985	1.30155	3.08015	3.27634	2.64898	1.10486	1.09567	0.793665	2.08714	1.5481	2.09432	2.50373	2.10838	2.58026
COL5A2	1.00815	1.14468	1.14863	1.91415	1.68931	1.7354	1.43386	2.30955	2.38408	0.649919	1.14547	1.75442	1.04357	1.44822	1.52314	1.31148	2.04637	1.29013
WDR75	68.8345	71.2446	70.1709	45.2485	45.6114	43.5477	31.067	33.4079	33.9069	56.348	72.4138	64.9134	43.4003	43.2969	44.7423	35.9464	35.8425	31.0921
ASNSD1	41.1103	54.9444	37.9048	31.1582	34.0365	33.2438	34.9969	31.3669	31.3109	41.7898	39.6433	42.6908	35.9725	33.7087	38.6973	36.6021	30.5095	34.5109
ANKAR	1.68026	1.73991	2.03621	1.59513	0.938506	0.976163	1.22144	0.913078	1.21853	1.88477	1.14547	2.38099	1.65744	1.39829	1.66594	1.78838	0.930168	0.838583
OSGEPL1	8.28927	9.75264	8.61473	4.41319	4.31713	4.55543	2.97394	2.41697	3.01984	7.99401	7.8689	8.8974	2.94655	3.19608	4.09344	2.44411	2.66648	2.64476
ORMDL1	31.1408	44.3218	34.2501	30.0416	31.8466	27.4953	24.6412	27.446	25.6421	40.295	36.1073	39.8921	32.719	27.0668	33.2235	30.1639	29.2073	30.2535
PMS1	26.044	38.5985	31.5351	15.6854	17.2685	18.0048	12.3206	14.287	15.2581	20.7324	28.9357	34.4618	15.4694	18.5273	19.658	14.0089	16.2469	15.8686
HIBCH	29.1805	34.7066	26.1575	30.5733	34.537	31.0203	28.6772	25.5662	29.6686	36.7204	28.7862	29.3238	36.1567	33.9584	37.7454	32.4292	28.1531	31.7371
INPP1	1.45622	1.28204	1.30526	2.23318	1.75188	1.62694	2.12424	1.87987	1.48343	1.42982	1.09567	0.91898	1.90298	2.24724	2.33231	1.78838	2.85252	1.74167
MFSD6	28.7324	20.9705	20.3621	52.2139	44.0472	47.2355	70.8965	63.1098	57.112	35.4856	34.912	26.9846	56.7825	57.6793	58.0698	69.389	68.9565	57.9913
NEMP2	7.05708	6.77648	6.94399	2.44586	2.81552	1.95233	1.27454	0.859367	1.11257	7.92901	7.52028	8.64677	2.63962	2.84651	2.99868	1.19225	1.48827	1.80618
NAB1	32.933	34.2945	37.2261	22.9698	24.0883	22.6687	16.8877	21.9676	20.5031	30.2862	38.4481	34.1694	25.8437	26.3677	25.941	21.699	22.8821	23.0933
GLS	50.9678	59.2942	63.2791	61.7315	74.8928	76.9542	72.8083	78.3636	83.4428	39.5151	60.9093	52.4654	50.5825	66.4685	61.6396	58.1818	75.3436	68.8928
STAT1	152.399	161.949	157.937	172.54	192.644	188.725	179.711	176.707	181.879	135.118	154.29	156.853	178.205	197.008	186.204	176.632	200.296	180.618
STAT4	0.112017	0	0.104421	0.797564	1.50161	0.542313	2.38977	2.84665	1.80131	0.129984	0.0996064	0	0.306933	0.549326	0.190393	0.23845	0.310056	0.322532
MYO1B	163.209	149.998	160.338	319.929	395.924	385.422	726.809	746.199	711.622	109.316	114.398	106.518	163.718	201.103	174.4	289.419	349.061	284.215
NABP1	4.03262	5.72338	4.90779	8.72003	10.261	8.94816	5.52303	4.99507	7.15224	3.50956	4.33288	5.43034	6.8139	5.49326	7.23492	2.92101	4.77486	2.96729
SLC39A10	38.5339	45.6039	38.3747	40.1441	42.1076	45.6628	42.1131	44.4185	46.0393	35.0306	40.739	43.1085	46.8993	43.5965	48.0266	37.3771	44.214	41.2841
DNAH7	0.168026	0.503657	0.365473	1.86098	2.00215	1.08463	0.955908	1.07421	0.900653	0.974879	0.597638	0.375947	2.70101	1.59804	2.04672	1.31148	1.17821	1.87069
STK17B	22.3474	30.0363	24.5389	15.5791	17.8316	16.4863	15.4539	14.4481	14.3575	26.5817	25.549	30.1175	16.8813	17.4786	19.0393	12.3994	15.2548	16.1911
HECW2	14.1142	9.29477	17.7516	22.2786	15.7669	25.1633	20.7645	18.3153	21.6687	9.87877	14.1441	10.9024	19.8892	22.0729	20.8956	13.7109	19.4095	14.3849
CCDC150	2.85644	2.88458	3.70694	0.850735	0.500536	0.759238	0.26553	0.107421	0.158939	2.4047	3.03799	3.21643	0.859411	0.649204	0.999562	0.298063	0.186034	0.322532
GTF3C3	62.1695	73.3508	65.4719	56.6802	51.4927	55.9125	52.097	48.9302	57.3239	64.8619	63.6983	74.8134	60.6499	52.3358	65.3523	53.532	48.1207	52.1212
PGAP1	19.2109	17.9485	20.3099	16.7488	15.5166	17.0286	15.6132	14.1796	16.4237	19.8225	22.4612	19.1315	20.2575	17.7283	20.5624	19.9106	22.324	24.1899
ANKRD44	6.60901	5.49444	5.74315	7.92247	6.88238	8.40585	8.65628	7.14349	7.20522	4.93939	5.77717	4.8873	6.3842	7.64063	7.09213	6.25931	7.25531	7.0957
SF3B1	493.492	504.207	486.08	446.37	445.978	445.347	457.508	443.272	463.783	508.042	500.223	475.238	468.502	472.371	479.456	464.262	458.263	449.416
COQ10B	51.3599	61.4004	48.869	69.0159	71.6393	66.1622	67.0729	65.3656	58.8603	48.7439	52.0941	52.549	66.9727	67.2675	69.3505	74.456	60.709	68.1188
HSPD1	800.083	985.016	931.122	599.236	734.475	666.34	501.852	510.786	519.889	694.179	849.891	866.223	575.376	608.254	647.621	469.389	475.998	490.184
HSPE1	122.323	173.808	147.338	85.6052	104.112	89.4816	71.9587	73.0999	70.7277	110.291	131.331	146.619	82.5649	79.4526	90.0557	70.6408	70.5068	71.6666
MOB4	113.585	146.518	101.341	92.4111	98.7308	94.1455	90.8644	90.717	90.3832	116.401	113.252	120.428	91.2204	96.3319	109.904	105.931	97.4816	105.468
MARS2	24.4757	20.5584	18.9002	22.2786	20.7723	21.7467	16.8877	17.0262	16.9535	17.0279	20.9173	19.215	23.2041	23.9706	20.372	13.7109	17.1771	16.3846
SATB2	28.1723	20.3294	29.0812	33.604	29.7819	32.4845	35.1031	34.8044	32.8473	19.9525	23.1585	20.5935	30.4477	25.8683	25.941	28.3756	25.4246	26.0606
SATB2-AS1	5.8809	4.39555	4.4901	5.42344	4.50483	3.90465	3.71742	3.86715	3.92049	7.01913	4.23327	4.8873	4.35844	4.29473	4.61702	4.05365	3.8447	4.32193
FTCDNL1	7.28111	7.60065	6.26526	6.43368	7.88345	7.48392	5.41681	6.06928	7.36416	8.77391	6.62382	6.76704	8.96243	7.64063	7.52051	6.1997	8.06146	8.0633
C2orf69	44.6388	48.58	48.6602	31.105	32.66	32.4303	28.0931	27.446	31.046	42.7647	44.0758	47.6199	33.3943	34.3079	35.413	28.1967	30.7576	30.2535
TYW5	17.0826	23.0767	18.6914	12.8142	16.1423	17.0286	13.5951	13.8573	15.0992	15.793	17.4311	19.8416	16.3288	15.9305	19.7532	15.6781	15.9989	16.3846
MAIP1	19.547	28.388	23.3903	19.0884	24.5889	19.6317	19.7023	20.8934	20.9269	22.8122	25.4992	26.0239	23.9407	22.7721	24.0847	22.5931	24.1844	23.9964
SPATS2L	23.9717	30.7231	31.3263	28.5528	40.8563	31.0203	35.5279	42.0553	37.7744	22.1622	30.3799	27.6947	21.4239	22.4225	23.7991	28.1371	26.7888	27.2862
KCTD18	29.1245	29.5784	26.5751	34.0294	31.0958	31.3457	38.1301	36.0397	37.5625	35.8105	27.8898	28.2378	37.0775	34.0582	38.0785	44.8286	41.5475	40.1875
SGO2	48.3354	65.8875	63.1747	11.0596	13.7648	16.2152	6.00098	5.96186	5.93371	42.6347	56.9748	62.4071	12.9526	15.6308	19.4201	6.14009	8.18548	9.67596
AOX1	0.112017	0.77838	0.522105	2.97757	3.81659	3.14542	1.69939	2.5781	2.01322	0.259968	0.597638	0.626578	2.88517	2.99633	3.28427	2.02683	1.42626	1.61266
BZW1	595.147	756.814	620.835	725.039	784.966	711.623	798.927	785.569	782.985	596.626	644.105	662.251	760.947	728.107	819.783	991.833	905.984	969.854
CLK1	18.7069	27.7469	22.8682	25.9474	24.3386	22.1806	29.1552	25.0828	26.8077	26.3867	25.9475	23.3087	27.1942	23.0218	19.7532	29.2697	23.3782	20.513
PPIL3	33.6612	41.8493	31.744	18.5035	17.769	17.7336	17.6312	18.5838	18.8078	42.5047	30.878	36.7174	18.6001	18.9767	22.9899	24.0835	18.2313	20.4485
NIF3L1	49.5116	63.415	48.6602	29.563	30.4702	31.7795	28.3055	28.574	28.7149	47.2491	48.8071	52.7161	33.4557	34.8573	38.6497	35.6483	32.928	34.1884
ORC2	53.2081	71.9314	70.2231	48.5451	62.004	51.8451	40.3606	42.1627	46.2512	47.834	61.3575	66.7096	53.1607	50.7877	57.3558	44.4709	43.3458	42.3162
FAM126B	24.1957	27.6096	28.9246	28.2869	29.1562	30.9118	25.2254	27.2312	27.6553	22.2272	29.2843	27.8618	30.3863	32.4602	34.8419	26.2295	35.2844	31.6726
NDUFB3	45.927	79.3947	56.3351	49.2363	62.6296	55.0448	37.7584	39.692	41.0592	57.5828	50.8989	70.2185	56.2914	54.9326	70.0169	46.0805	45.3302	57.4752
CFLAR	41.0543	32.5546	34.9288	49.3426	39.3547	43.4935	51.2473	40.6051	49.218	48.289	40.739	36.6339	48.5567	43.8462	44.1711	44.8286	41.6095	40.768
CASP8	17.8667	24.084	23.7558	26.4791	29.4691	29.7187	15.8256	13.911	16.4767	18.7827	24.4036	25.815	25.2299	27.6661	28.7493	11.7437	14.4486	17.3522
TRAK2	90.9579	99.0831	93.0913	84.7545	90.5345	85.7939	104.513	105.487	105.376	94.4982	94.6261	91.898	78.0223	82.9982	85.1055	75.0522	82.4129	79.9234
STRADB	28.5644	30.1737	29.2901	19.2479	22.4616	21.096	22.4107	24.492	23.0991	22.8122	24.7522	28.2378	18.2932	17.1789	18.5633	19.3145	19.0374	19.2874
TMEM237	39.9341	49.9536	38.2703	18.2908	18.8327	21.2587	16.9939	17.7245	16.9535	35.2256	33.7168	42.0225	19.8278	19.3762	22.3711	15.9762	15.3788	15.3525
ALS2	40.1021	46.8859	48.2947	39.825	40.606	44.6866	42.6972	44.526	49.377	35.4206	43.5778	44.1528	40.0854	43.197	44.5043	42.0864	43.2838	38.3813
FZD7	61.4414	53.5708	57.5882	76.9383	58.8756	67.7891	109.239	96.3029	83.2839	55.958	56.676	57.9375	82.9946	66.2188	65.2571	63.9642	53.8877	50.573
KIAA2012-AS1	0.672103	0.228935	0.365473	0.478538	0.250268	0.650776	3.77053	2.14842	2.11918	0.194976	0.0996064	0.167087	0.245546	0.0499388	0.0951963	0.4769	0.248045	0.516051
SUMO1	178.555	218.267	163.053	174.56	200.59	161.663	188.686	188.416	178.753	194.976	174.212	180.58	193.736	175.285	196.818	215.678	193.041	196.551
NOP58	131.62	159.568	133.554	106.767	114.122	96.0436	77.1099	72.2943	73.9595	136.613	126.002	128.031	109.329	101.526	102.622	87.9881	73.1112	77.6012
BMPR2	172.394	119.138	146.764	230.868	182.008	223.704	290.171	256.736	267.6	152.211	161.014	128.365	215.405	215.586	198.008	254.545	258.029	226.675
FAM117B	35.1734	25.4118	27.0972	30.786	26.5284	23.6991	36.3245	31.528	30.4103	31.1311	29.8321	26.1074	34.4992	28.8147	27.8925	38.5097	31.2537	29.7374
ICA1L	7.67317	9.43213	9.81557	8.08198	7.88345	7.26699	8.44386	7.73431	9.69526	6.88914	7.37087	7.35184	6.8139	7.54075	8.18689	7.6304	8.06146	7.99879
WDR12	56.5127	70.512	62.3393	38.6553	37.5402	36.335	26.0751	25.2439	26.9666	50.6937	52.4926	58.1464	39.6557	33.3092	40.7916	20.9836	21.5799	24.2544
CARF	11.4257	11.2636	9.65894	9.5176	8.94709	8.40585	13.8076	10.3124	12.1323	15.5981	9.26339	9.77461	8.96243	8.28983	9.37684	13.4724	9.85978	10.7726
NBEAL1	27.8363	24.7708	30.4909	36.4753	34.2242	47.7235	37.1742	38.8327	43.7082	25.2819	28.9357	28.5302	37.3844	44.5454	38.4593	30.8793	36.1525	34.8335
CYP20A1	11.0337	14.7892	12.1128	11.5381	12.2006	11.1716	13.7014	12.5145	14.7813	14.1032	11.5045	10.9024	14.6714	12.3349	12.0423	12.459	15.3788	12.3852
ABI2	128.82	137.041	136.165	102.301	105.926	107.378	95.3784	99.3643	101.191	134.988	128.442	134.129	97.4818	103.873	114.331	91.5052	94.009	100.823
RAPH1	119.746	75.2281	116.325	109.638	86.5302	107.866	144.501	129.603	155.442	126.604	145.973	122.099	126.272	136.632	113.855	155.946	219.52	201.066
PARD3B	9.29742	5.90653	8.30147	13.0269	11.7626	16.0525	28.1993	28.0906	28.45	9.29384	7.17166	6.26578	9.76046	12.235	10.8524	21.4009	22.324	20.4485
NRP2	0.504077	0.595231	0.678736	1.01025	0.938506	0.813469	1.69939	2.25584	1.05959	0.519935	0.348622	0.375947	1.10496	0.898898	0.571178	1.13264	1.36425	2.12871
MDH1B	0.504077	0.961528	0.678736	1.43562	0.875939	0.379619	0.79659	0.859367	0.847673	1.23485	0.846654	0.877209	1.22773	1.14859	1.04716	0.71535	0.868157	0.516051
FASTKD2	57.3528	75.4112	63.6446	46.4182	49.9285	49.3505	37.1211	38.7252	41.536	52.1885	60.6105	66.2084	47.0221	47.4918	53.0244	39.8212	39.5632	41.9937
CREB1	62.7296	72.3435	73.0425	52.0012	57.9371	59.1121	72.3835	70.0921	75.1251	66.4867	71.368	72.4324	53.7132	56.6805	61.4968	60.3279	71.3749	66.5061
METTL21A	25.2039	29.0748	29.7078	18.5567	17.8942	19.0894	12.7985	11.0106	14.1455	26.1267	28.4874	27.6112	19.7051	18.3275	19.3725	14.2474	12.5883	14.772
CCNYL1	28.2283	38.5069	42.1861	30.0416	33.5985	34.4369	21.6141	24.116	25.854	20.7324	42.3327	43.4009	32.4121	37.0046	35.9366	23.4873	26.8509	26.1251
FZD5	30.2446	22.8477	24.4867	29.9884	27.4044	26.6818	34.9969	33.5153	32.3705	25.8668	27.591	23.8935	23.2041	25.5686	19.4677	29.8063	30.6956	25.222
IDH1	136.997	186.445	156.318	160.417	195.647	173.703	153.689	164.408	172.449	140.642	149.957	177.823	187.29	201.403	219.19	203.279	215.923	228.546
IDH1-AS1	0.78412	1.32782	1.46189	0.58488	0.500536	0.867701	0.584166	0.698236	0.582775	1.23485	1.09567	1.21138	0.798025	0.998775	0.666374	1.01341	0.744135	0.70957
PIKFYVE	41.6144	33.6993	39.3667	43.2811	34.7873	44.5239	44.2904	42.8609	47.8406	37.4353	43.9762	38.1377	42.8478	41.4492	39.9825	48.2861	43.6559	43.2193
MAP2	0.78412	0.503657	0.469894	2.65855	2.87808	2.22348	6.00098	6.98236	5.82775	0.519935	0.448229	0.292403	1.16634	1.39829	1.33275	1.72876	4.21676	2.51575
RPE	81.7165	121.565	90.6896	92.2516	110.055	97.6706	79.5528	85.0237	83.2839	87.9341	92.0861	98.7904	100.367	98.0797	109.761	83.0402	87.0638	90.2444
KANSL1L	4.14463	5.21972	3.60252	3.40294	4.81766	4.82659	7.00999	7.30462	6.78139	6.23922	4.6815	4.84553	5.70895	4.84406	6.42575	6.02086	5.76704	6.51515
LANCL1	129.492	116.024	105.935	114.849	107.24	105.263	114.125	107.475	107.072	153.511	110.613	123.352	120.318	118.405	125.326	118.39	124.395	118.627
ERBB4	3.64056	3.02194	3.13263	12.7079	10.0733	12.419	13.5951	9.02336	9.27143	5.91426	5.42855	3.59238	15.8991	12.2849	12.3279	14.5455	15.0067	12.0627
IKZF2	15.3463	13.6903	15.9242	19.0884	18.7076	21.9094	17.7905	15.8983	21.9335	18.5877	13.7955	14.0771	17.2496	19.4761	20.5148	14.5455	17.5492	18.9649
BARD1	56.2326	63.3235	60.773	14.303	14.1402	15.3475	9.93082	8.59367	9.74824	59.2726	57.1741	58.5641	16.2674	18.6272	17.3733	11.2668	11.286	9.99849
SNHG31	1.73627	2.51829	3.81136	1.70147	1.06364	1.68117	1.96492	1.77245	1.37747	2.72966	2.29095	3.29998	2.02575	1.89767	1.85633	1.9076	1.36425	1.93519
ABCA12	121.091	81.3178	123.165	182.217	110.431	189.213	34.9438	30.0779	56.6352	288.629	264.206	179.744	321.42	321.606	337.043	87.7496	165.384	169.845
ATIC	280.883	280.72	289.089	212.046	225.429	229.615	208.335	210.921	227.282	288.629	320.384	300.381	225.964	245.149	242.751	223.964	238.371	235.513
FN1	98.3511	61.9956	102.594	96.133	74.9553	90.9459	49.0169	48.3394	54.9398	99.4376	116.49	100.419	103.191	107.818	78.061	39.8212	58.2905	45.1545
MREG	89.2777	106.501	85.6774	94.8038	102.422	87.4208	62.7713	66.8158	71.8403	114.061	88.1516	85.131	113.933	99.1284	101.527	62.5931	65.4838	61.7326
PECR	23.2436	32.9209	24.6956	19.9923	21.5231	22.2891	19.9148	16.8651	20.768	24.6969	24.0051	26.6922	23.4496	21.0742	26.655	22.6528	19.4715	23.9964
TMEM169	8.00923	7.82958	7.04841	4.62587	4.88023	5.15197	4.72644	4.08199	4.45029	4.93939	6.47441	6.30755	3.6218	3.0962	4.99781	3.51714	2.97654	3.28983
XRCC5	661.237	735.523	642.346	500.87	531.695	484.882	453.791	457.237	445.717	574.399	652.422	646.001	501.712	504.981	529.434	432.31	442.078	439.418
LINC01963	4.31266	2.42671	3.02821	4.62587	3.06579	3.95888	5.20439	5.42476	4.07943	3.05462	3.73524	2.08859	4.17428	3.94516	2.99868	3.45753	4.21676	3.48335
SMARCAL1	21.4513	26.0528	28.6113	21.9064	23.4001	26.3022	18.3216	21.5379	21.5627	17.1579	25.1506	26.6504	22.4061	26.118	26.9882	18.8972	20.8358	20.384
RPL37A	344.453	362.542	322.295	345.611	393.797	349.629	339.825	339.396	334.354	394.046	319.836	327.157	393.733	349.721	340.993	367.094	347.077	372.266
IGFBP2	344.621	284.75	359.521	356.883	344.619	402.83	399.198	393.483	439.254	377.928	322.326	342.571	348.675	340.233	318.622	355.052	425.893	459.866
[truncated: 10,099 more rows]

## Sheet: Supp4b - T-47D normalised CPM
	T47D_pLenti_VEHICLE_rep1	T47D_pLenti_VEHICLE_rep2	T47D_pLenti_VEHICLE_rep3	T47D_pLenti_TAM+PALB_rep1	T47D_pLenti_TAM+PALB_rep2	T47D_pLenti_TAM+PALB_rep3	T47D_pLenti_FAS+PALB_rep1	T47D_pLenti_FAS+PALB_rep2	T47D_pLenti_FAS+PALB_rep3	T47D_MKK7_3_VEHICLE_rep1	T47D_MKK7_3_VEHICLE_rep2	T47D_MKK7_3_VEHICLE_rep3	T47D_MKK7_3_TAM+PALB_rep1	T47D_MKK7_3_TAM+PALB_rep2	T47D_MKK7_3_TAM+PALB_rep3	T47D_MKK7_3_FAS+PALB_rep1	T47D_MKK7_3_FAS+PALB_rep2	T47D_MKK7_3_FAS+PALB_rep3
GeneID	FD02632901	FD02637122	FD02637211	FD02632903	FD02637126	FD02637220	FD02636852	FD02637130	FD02637230	FD02636860	FD02637132	FD02637231	FD02637102	FD02637135	FD02637236	FD02637117	FD02637208	FD02637241
LINC01128	14.7481	14.3627	14.212	11.5138	10.9157	12.1135	11.0317	10.3961	10.2837	13.2627	14.4834	15.9924	11.0294	11.7715	13.4009	10.0743	11.6101	12.1707
LINC02593	6.58598	5.82768	7.12869	16.8112	14.048	12.7176	17.0349	15.6364	14.7829	10.4409	7.34144	11.4496	14.6425	14.3382	15.1033	14.8464	12.5417	17.8962
SAMD11	20.7712	19.8692	19.2974	18.0544	19.9805	17.1687	15.8548	16.3971	14.5686	22.4055	20.9071	26.0514	21.1556	23.2331	20.4287	17.2618	16.8418	20.2191
NOC2L	150.239	162.67	115.013	116.327	125.483	106.51	104.878	106.75	97.5349	151.026	142.998	170.354	105.73	110.811	126.021	92.7308	102.269	108.98
KLHL17	7.93695	11.5636	14.9839	4.00008	5.83752	3.94245	2.77074	4.26832	4.28489	4.96646	8.45862	12.145	3.2803	3.31902	4.88893	2.94571	2.93835	3.40257
PLEKHN1	4.55953	5.50647	4.08651	3.94603	4.50866	3.43375	4.15611	3.93024	3.80284	3.95059	4.34901	4.95997	2.18687	2.30119	3.23019	2.47439	2.72335	2.97725
PERM1	1.745	1.23896	1.49839	3.02709	2.65773	2.35275	4.05349	4.43737	4.28489	1.91886	1.51617	1.52971	3.99341	3.0535	2.61907	4.65421	4.51503	4.71125
HES4	31.4101	39.5548	46.7679	21.6221	23.445	17.5503	24.5775	23.1588	28.1196	31.379	34.0739	37.5011	19.4441	14.9135	13.7501	21.5626	22.2885	18.0925
ISG15	3.15227	2.11081	3.13299	4.86497	3.65439	3.84707	7.28602	4.90223	4.92763	3.4991	4.34901	3.15213	3.99341	2.43395	2.96828	5.65575	6.80838	3.63159
AGRN	500.647	550.647	380.954	687.311	677.722	498.848	713.209	597.101	524.685	482.537	371.102	586.759	488.48	428.729	575.671	445.509	449.138	598.623
RNF223	21.7844	21.98	17.1179	19.2436	19.5533	19.5215	13.905	14.7912	17.1396	19.1322	21.4657	17.244	10.7442	11.1962	11.262	9.01386	9.31672	8.24468
C1orf159	21.1089	20.5575	24.2466	13.2435	15.0921	13.8622	14.9825	13.5657	16.9253	17.8905	16.8374	21.1842	11.8376	11.4617	13.0517	13.3735	12.4701	14.0029
TNFRSF18	4.61582	6.37833	7.35572	0.648662	1.13903	0.985613	0.46179	0.591649	0.321367	2.53967	4.4288	3.98652	0.332784	0.531043	0.436512	0.765883	0.573337	0.425321
SDF4	159.021	157.072	150.974	154.814	160.366	157.762	177.173	170.944	179.162	167.844	158.001	171.096	177.85	172.855	169.672	187.17	188.198	192.703
B3GALT6	33.8306	30.9739	29.0596	34.271	30.5165	31.2217	32.5305	27.0046	28.3339	32.3949	29.7648	33.9317	31.2817	26.8177	28.7661	26.8648	27.2335	29.8052
UBE2J2	56.8534	62.6361	59.5269	54.9201	53.2971	55.6395	56.6976	54.3049	53.2934	65.0155	64.477	64.1551	60.4242	57.1757	55.4806	57.5591	59.1254	56.5022
SCNN1D	2.3642	3.258	4.08651	1.13516	1.756	1.43073	1.84716	2.15529	2.14245	1.69311	1.67576	2.92035	0.998353	1.19485	0.960325	1.00154	0.716671	1.27596
ACAP3	45.4827	59.3781	56.6663	32.325	34.5031	28.551	38.6877	38.4149	37.5999	44.1338	40.2582	53.169	26.6228	24.074	27.6312	31.4012	30.1002	31.7682
PUSL1	24.5426	30.2397	31.1937	17.7842	17.5126	16.3421	19.1899	18.1298	18.4786	31.9998	29.6451	30.9187	18.731	16.7279	18.5954	21.5626	21.7868	19.4993
INTS11	91.6971	92.417	85.7714	81.353	84.2882	74.5251	87.2783	86.5921	83.0734	87.0823	87.2993	101.981	82.2453	83.3738	80.1435	81.3604	89.9422	88.4667
CPTP	52.7442	57.6803	49.9009	68.0014	59.0871	55.099	63.0087	57.728	57.3105	61.0649	53.385	63.3207	64.7028	60.7602	63.2505	58.2661	63.6404	59.2505
DVL1	60.3997	73.8785	60.6166	60.2715	61.0804	50.5206	57.6724	55.0656	53.0256	58.8074	56.1381	73.7969	46.78	47.4841	51.0719	47.2491	42.0686	54.3429
MXRA8	183.057	166.708	151.655	239.735	218.504	199.762	305.551	266.369	285.749	133.022	94.4412	124.231	157.217	134.974	149.025	177.626	178.881	166.366
AURKAIP1	101.154	111.277	118.055	76.7583	80.349	82.2192	77.5294	69.3497	79.4312	112.197	108.965	109.166	94.2255	88.9055	80.58	89.5495	95.4606	77.9973
CCNL2	56.009	77.2283	129.906	53.893	77.9286	67.0535	60.1353	79.4077	86.5549	58.8074	78.0826	81.3064	71.7388	65.0086	58.1433	71.1093	64.2854	55.8152
MRPL20-AS1	32.7048	32.3046	32.7829	31.2439	29.0452	32.6524	28.5797	32.8365	29.9407	33.2979	32.1188	36.1104	30.4735	30.0039	28.3296	33.8756	30.3152	31.6373
MRPL20	58.9361	57.0379	68.5626	51.2984	52.3479	55.9574	50.4377	48.9378	52.7042	65.3541	70.5018	58.6852	61.3274	64.6988	53.7782	61.6242	61.132	49.7625
LINC01770	2.30791	3.07445	2.81515	3.02709	3.60693	3.43375	4.31004	3.88798	4.12421	3.83772	2.91264	3.15213	4.27866	3.98282	3.27384	6.48055	5.80504	4.08962
VWA1	128.117	124.125	113.287	162.706	154.291	127.017	226.688	189.919	192.927	136.352	100.785	125.761	155.363	141.213	142.128	216.215	232.201	223.588
ATAD3C	1.1821	1.33073	1.36217	0.756772	0.711893	0.826643	0.41048	0.507128	0.321367	0.620807	1.15707	1.06616	1.18852	0.708058	0.39286	0.765883	0.215001	0.523472
ATAD3B	12.1024	18.4008	23.5202	7.18934	9.15969	7.53517	4.15611	7.7337	8.56979	12.0211	17.3561	18.8664	6.65569	6.72655	5.76195	5.47901	5.16003	5.92177
ATAD3A	46.9462	55.4318	42.6359	24.2708	24.9637	24.545	27.0404	23.4547	24.3168	44.6417	44.8466	52.9836	24.008	23.8527	26.3216	24.5672	25.8002	28.5619
SSU72	135.885	140.736	151.473	147.408	143.802	143.868	147.414	140.517	139.848	149.727	151.457	141.058	170.053	159.313	156.14	157.006	161.896	145.165
MIB2	16.8871	19.548	18.1169	23.514	23.1128	19.9348	20.7806	23.8773	22.2279	19.3579	16.4384	21.3696	19.4441	18.8963	19.3375	17.0851	18.9201	20.35
CDK11B	62.4261	61.856	38.5948	63.1905	67.7722	53.7636	60.6997	65.6308	50.1333	56.042	52.5073	63.367	49.5373	53.0601	65.1275	45.7174	48.3753	62.9148
SLC35E2B	66.8731	67.2248	66.3377	98.5966	105.36	83.9361	102.825	102.398	93.9463	69.3611	67.4295	75.0948	87.0469	81.6037	86.342	78.8271	74.6771	85.5549
CDK11A	52.8567	55.5236	35.7797	50.3254	59.3719	46.292	54.0294	53.9246	48.58	44.3031	39.4203	50.5268	42.8341	48.9002	55.6552	43.4197	40.7069	49.1409
SLC35E2A	87.4191	85.9927	77.2351	122.111	133.314	110.579	128.429	131.557	123.887	86.8566	83.9079	91.6435	104.066	101.96	109.041	100.39	99.7606	110.583
NADK	79.651	87.7823	87.1789	88.4343	83.9559	79.2624	97.6429	95.5513	97.5885	85.615	73.8932	86.359	79.9634	69.3012	77.0006	91.6704	78.1172	87.4852
GNB1	347.256	339.474	284.558	390.116	363.303	350.242	403.04	384.656	373.161	370.791	322.385	354.568	342.435	341.417	362.697	338.638	369.516	376.343
TMEM52	3.43372	4.35929	3.90489	0.432441	0.854272	0.763055	0.56441	0.507128	0.482051	2.87829	3.83032	4.26464	0.855732	0.619551	0.829372	0.824798	0.645004	0.752491
GABRD	5.06614	5.91946	4.85841	2.43248	3.93914	2.86146	3.48908	3.93024	2.51738	6.82888	7.06215	6.86051	4.04095	5.66446	4.01591	5.36118	6.23504	5.33287
PRKCZ	40.8669	40.6102	34.69	52.5957	51.3512	53.0006	55.4148	54.5585	56.8284	45.7704	37.4254	43.4808	47.3505	48.502	52.1195	52.0801	51.3137	58.0072
FAAP20	29.2147	32.167	34.0089	27.8384	28.6656	24.9583	29.3493	25.0606	28.441	30.476	27.0516	30.1306	27.7637	21.0205	22.0438	24.9207	25.9435	21.4296
SKI	59.8367	52.8162	34.1451	59.731	57.9956	43.4624	71.6288	61.2357	52.5435	53.2201	39.7794	59.3805	44.9259	39.1202	53.7782	49.9592	47.157	66.5463
MORN1	9.79454	10.2787	8.71789	7.13528	8.87494	8.17105	8.2096	8.66343	9.48033	8.74774	8.53841	10.1054	8.27207	7.56737	8.94849	8.3658	8.74339	9.48793
RER1	135.097	149.592	172.95	137.679	132.507	141.515	127.197	126.317	138.241	155.315	161.552	144.581	153.081	148.515	139.815	148.051	153.654	127.956
PEX10	36.4762	38.6371	36.7332	39.7846	38.0626	36.8174	41.1506	38.0768	42.2598	38.8851	38.2234	37.1302	43.0243	42.0852	35.0519	43.184	42.9286	41.5506
ARHGEF16	40.4165	43.3635	36.597	26.5951	26.5299	23.5911	24.988	25.2719	25.9236	29.1779	28.7673	36.713	19.7294	16.6394	18.5954	17.9099	16.2684	19.5975
MEGF6	16.0991	21.0623	20.1601	12.1084	12.6242	9.22025	20.8832	18.0876	18.0501	15.5202	11.9697	21.8331	10.1262	7.61162	10.7818	13.7859	10.9651	13.0868
TPRG1L	80.3265	82.7347	72.1951	123.57	119.361	127.526	119.86	113.428	126.565	94.8707	83.0301	84.3658	121.038	118.821	117.465	120.774	122.766	117.847
WRAP73	23.8672	24.5956	28.5602	14.2165	15.282	17.3277	13.4432	15.1716	15.6399	21.6718	22.5829	25.5415	16.8294	15.2675	15.4962	17.0851	16.7701	16.8165
TP73	42.3304	38.4994	27.6975	17.7842	26.3401	18.5041	17.2915	16.2281	10.6051	39.3366	35.6299	45.2423	21.9162	23.7642	27.9367	27.7485	28.0218	24.4069
SMIM1	3.15227	4.40518	5.5849	2.70276	2.42044	2.06661	2.20633	1.77495	2.24957	2.53967	3.71062	2.68858	2.23441	2.30119	2.18256	1.88525	1.72001	1.37411
LRRC47	61.0188	69.2439	55.2133	74.5421	72.9928	66.7991	74.2969	67.8283	64.9161	74.384	64.9558	69.1614	69.5044	70.0977	72.8538	60.7405	64.2854	71.4866
CEP104	42.9496	41.115	36.7332	41.5684	47.6019	42.6993	44.3832	49.1491	45.6877	38.8851	38.5825	43.8053	36.4161	34.1638	40.3337	41.3577	39.9902	43.2191
DFFB	6.86743	5.96534	6.26599	2.97303	3.65439	2.82966	3.69432	5.19806	4.28489	3.32979	5.90507	5.14539	2.32949	2.38969	2.70637	2.17982	2.43668	2.19204
C1orf174	28.3704	28.1748	41.4554	24.8654	26.1028	28.0741	24.1157	23.6237	27.6376	27.0898	31.8395	26.2832	32.0424	30.2695	28.5042	30.3997	31.8202	28.8564
NPHP4	21.9533	24.3661	18.7526	15.5138	18.9838	14.816	18.1637	19.778	16.9789	18.1727	18.5531	24.5217	13.6917	16.5066	17.7224	15.7301	15.1218	19.5648
KCNAB2	9.90712	11.6095	11.533	6.21634	4.93579	5.46856	4.41266	4.60641	4.23133	7.56256	7.93993	9.68816	3.94587	3.58454	4.27781	3.94725	4.51503	4.22049
CHD5	5.00985	5.50647	3.81408	1.18921	1.13903	0.922025	0.92358	1.01426	0.696295	2.31392	2.11465	3.89381	1.2836	0.531043	1.44049	0.883712	1.07501	1.17781
RPL22	414.241	372.375	417.097	441.793	426.329	429.06	411.455	400.715	429.936	416.9	391.131	370.004	431.859	451.121	419.444	445.626	472	361.228
RNF207	6.4734	8.76447	11.8963	5.08119	7.30877	5.37318	6.05458	8.36761	6.26666	3.32979	6.18437	6.72145	5.13439	4.46961	4.05956	4.88987	4.30003	2.71551
ICMT	175.063	183.687	163.143	125.624	116.561	110.452	130.481	123.063	124.476	165.925	152.255	162.937	102.117	102.403	101.14	102.982	108.791	112.579
GPR153	16.8871	20.6952	14.439	15.9463	14.4277	12.2089	13.7511	11.2413	11.1943	17.2133	14.6829	20.2571	12.836	12.568	16.3692	11.9596	12.9717	14.2646
ACOT7	71.9392	76.7235	65.021	49.4605	49.0732	48.772	41.4585	40.9928	38.8854	73.1424	76.2073	76.0219	46.1144	52.9273	50.9845	36.4089	42.2836	39.3258
HES2	8.16212	10.9212	7.26491	8.37855	7.64099	6.26341	6.97816	7.945	6.80227	8.01406	8.41872	8.01938	5.41963	4.2926	4.71432	3.53485	2.79502	3.468
ESPN	94.568	106.78	100.301	84.7045	91.3122	66.6402	116.628	113.301	98.9275	123.089	100.187	147.362	100.501	89.6578	95.0286	107.931	106.426	110.125
TNFRSF25	6.64227	11.0129	13.985	2.37843	3.55947	2.22558	2.0524	2.91598	2.83874	4.91002	6.26416	9.17826	1.56884	1.8144	2.92463	1.82634	1.86334	1.76672
PLEKHG5	36.1385	40.1972	41.0468	23.1897	26.3401	17.6775	20.4214	21.3416	18.5857	33.58	36.3481	47.2819	20.2523	20.2682	22.5676	15.8479	16.0534	18.6814
NOL9	19.9268	26.2016	18.1169	20.4329	20.55	15.3883	19.9596	18.003	17.6752	25.7353	23.1016	20.767	18.8736	19.2061	17.8097	16.8494	13.9751	21.7241
ZBTB48	13.2283	14.1333	15.8012	13.1354	13.9531	13.9894	13.5458	14.1573	15.3721	12.6983	13.0869	15.4825	13.2638	12.7008	15.147	12.5487	12.6134	12.6942
KLHL21	31.0723	34.0484	26.2445	32.0007	26.9096	22.224	26.8351	21.5107	21.1567	35.6682	28.5279	36.4812	27.4309	24.5165	28.1986	19.913	17.9168	23.7852
PHF13	50.8866	54.5141	40.9105	36.217	38.2049	32.0165	42.1255	33.893	35.886	53.5023	49.9138	59.1024	38.6981	34.9604	39.8972	41.4166	39.8469	42.2376
THAP3	20.6023	19.7774	22.2488	16.0003	17.3702	16.5647	16.6244	17.6227	20.4068	17.8341	19.9496	18.2174	15.6884	17.1261	13.4009	17.144	18.8485	14.1992
DNAJC11	70.5882	67.6378	54.9863	67.7311	68.7214	63.429	72.7576	67.3212	64.4877	68.1195	62.9608	69.2541	61.993	63.5482	65.3458	61.742	64.2137	68.8693
CAMTA1	26.0062	27.8995	35.8705	23.8924	25.0586	25.9757	24.4749	24.0886	28.1732	23.6471	27.4506	24.1509	22.5343	22.1711	19.8613	25.2152	23.6501	20.7753
VAMP3	121.137	118.435	139.986	151.03	148.169	161.45	158.753	157.083	164.326	136.465	133.941	118.715	164.015	156.304	151.731	166.786	179.311	151.218
PER3	47.6217	50.6137	39.0035	25.8924	29.4724	25.5306	25.0906	26.751	21.0495	49.326	48.637	57.3409	25.7195	28.8976	31.1669	24.6261	26.4452	31.6373
PARK7	173.037	177.721	227.528	171.247	165.444	181.703	162.088	167.521	172.628	194.256	220.323	170.957	195.059	210.382	172.99	200.367	216.65	161.982
ERRFI1	70.926	87.8741	76.6448	88.0559	98.6209	100.564	81.5316	103.877	95.2853	60.6698	69.8235	60.8175	77.7289	93.2866	86.6912	74.8798	95.7473	76.9831
RERE	101.548	76.2187	50.4003	102.813	110.296	75.924	123.657	101.637	80.3953	93.8548	64.6765	111.066	99.0272	82.0462	125.192	101.686	102.054	139.44
ENO1	1070.14	1112.17	1000.61	1133.7	1020.29	977.887	1416.46	1342.16	1345.83	1179.42	1007.33	1018.46	1011.85	1016.42	999.35	1366.04	1524.93	1285.32
GPR157	43.0622	48.1357	41.9549	46.001	54.3412	50.0755	50.489	48.0926	51.4723	48.0844	45.884	53.6789	46.8751	49.3428	48.802	43.4786	43.1436	46.1309
MIR34AHG	1.745	3.44154	5.13084	1.45949	2.75265	1.87584	1.89847	2.3666	2.57094	2.03173	3.67072	2.45681	2.61474	2.43395	1.30953	1.88525	3.01002	1.50498
LNCTAM34A	1.51984	1.33073	2.72434	0.702717	1.61362	1.39894	0.97489	0.971995	1.17835	1.5238	1.75556	2.08597	1.66392	1.06209	1.13493	1.47285	1.64834	1.24325
H6PD	49.7608	48.1816	34.0089	62.8121	60.7957	47.8499	72.2958	70.7866	60.6848	44.6417	35.1511	51.3611	46.0669	43.5456	51.7266	54.908	54.037	71.1594
SPSB1	12.0462	12.1601	10.6249	5.45957	6.26466	5.11883	8.2096	6.93075	6.58802	13.8271	10.8925	14.5554	6.56061	6.50528	7.20244	11.7239	9.60339	13.0214
LINC02606	0.619195	0.550647	0.908114	0.648662	0.711893	1.11279	0.97489	1.3946	1.9282	0.620807	0.718184	0.695322	0.855732	0.840819	1.26588	2.00308	1.00334	1.40683
SLC25A33	26.4565	31.2951	40.7289	24.9194	23.1128	28.8689	23.2434	24.5534	29.1373	30.7582	35.1112	29.4817	29.808	28.6763	25.0558	26.8059	29.3835	25.3884
TMEM201	26.1188	31.754	22.7028	9.45965	9.58683	8.87052	10.0568	9.17056	7.92705	24.5501	23.9395	28.9254	8.41469	7.16908	9.99611	6.30381	6.37837	7.91751
PIK3CD	4.78469	4.90994	3.72327	5.13524	4.41374	3.81528	4.97707	3.59215	4.65982	4.91002	3.71062	5.60893	3.61309	2.4782	4.10321	3.59376	2.15001	3.92604
CLSTN1	204.672	194.516	138.26	186.544	189.696	156.108	213.501	200.4	174.717	173.431	148.225	190.194	155.458	152.232	189.01	178.628	171.786	218.811
CTNNBIP1	81.2834	86.3598	94.0806	72.7042	72.2334	73.0308	73.8864	74.1674	71.6649	83.9783	83.5089	78.8959	75.8749	70.319	65.1712	67.3977	72.3121	66.4155
LZIC	59.6116	64.7469	71.3778	69.0825	71.0469	69.3745	52.2849	60.7708	59.7743	60.2748	66.5916	57.2946	69.5044	74.5673	69.0125	62.6846	60.057	58.8251
NMNAT1	12.8342	10.1411	11.6239	17.7301	21.1195	20.3481	13.1867	17.9185	19.7105	12.7548	12.3288	10.9397	22.2966	21.5515	20.7343	19.9719	16.7701	16.8492
RBP7	28.5393	30.4233	44.2251	12.5408	13.7633	15.6426	7.43995	8.11404	7.65925	19.753	34.5925	24.2436	13.0737	15.1347	11.1747	6.95187	7.95505	5.82362
UBE4B	88.8826	83.5607	61.3431	94.7047	96.0581	84.8581	90.6135	92.3395	80.556	86.7437	76.8058	96.418	81.6748	85.0112	98.6516	72.8178	82.4888	97.2676
KIF1B	86.3495	83.423	54.169	85.1369	89.6036	70.1693	84.0458	78.309	65.4518	66.9343	58.2527	90.2992	54.0537	52.175	80.8856	47.308	49.8803	76.525
PGD	274.923	264.632	220.626	246.816	230.511	212.734	239.772	230.236	222.225	281.847	248.731	238.588	221.825	224.1	218.125	213.387	235.283	206.64
CENPS	26.9631	25.3757	32.5559	14.7571	12.4819	18.3133	16.6244	18.7215	17.943	24.8887	30.1238	24.7071	17.1622	17.6129	14.9723	21.4447	20.7118	20.4481
CORT	1.1821	1.33073	1.77082	0.270276	0.616974	0.604086	0.76965	0.63391	0.642734	0.95943	1.67576	0.973451	0.380325	0.48679	0.611116	0.530227	0.286668	0.392604
DFFA	69.4624	74.062	74.4199	60.3256	62.0771	63.429	60.8024	67.7015	70.1651	57.2836	65.1553	67.0291	52.057	52.352	49.1512	61.2118	54.682	52.3145
PEX14	29.7214	29.5973	25.3364	28.6492	28.191	28.0741	29.5033	26.4552	31.8689	27.5977	26.6925	29.0181	30.2358	29.0746	28.6352	30.3408	29.0252	29.0854
CASZ1	53.0819	50.4301	35.4164	67.1365	81.4406	53.859	76.3493	73.0687	56.2928	58.0737	42.6921	72.8234	68.3159	64.4775	88.0007	68.3993	78.0455	103.059
TARDBP	221.447	234.025	221.716	182.977	186.991	196.01	168.81	183.876	178.894	228.062	249.05	223.106	179.941	207.24	183.728	182.634	178.236	172.713
SRM	56.0653	64.1504	63.3409	38.8116	38.0151	36.0544	42.0742	35.4144	39.421	63.9996	65.8735	66.4728	41.0276	39.3857	40.3337	37.1159	39.9186	39.5548
EXOSC10	105.207	111.735	91.7649	76.0016	85.5221	80.8839	91.691	88.7896	87.5725	100.571	102.66	107.172	79.8207	82.6215	91.5365	83.4224	80.7688	87.4525
MTOR	123.952	117.242	67.9723	122.813	119.93	93.7922	122.169	116.301	84.2517	93.5162	77.3245	122.655	84.4322	85.0997	118.731	75.4101	83.6355	124.488
UBIAD1	27.8638	32.4882	30.4672	25.9465	20.7873	23.6865	19.8057	18.003	18.3715	28.2185	30.9617	30.5942	23.9129	22.0383	21.3018	17.5564	18.8485	17.8962
DISP3	0.731776	0.963633	0.63568	3.08114	4.03406	2.92505	0.46179	0.380346	0.214245	0.620807	0.957579	1.76148	3.66063	5.13342	6.67863	1.35502	1.07501	1.5377
FBXO2	10.5826	10.4164	10.6249	18.8112	18.6991	19.6805	16.7784	15.5942	14.9971	12.529	10.6531	12.6549	18.0654	19.5601	19.4248	15.1998	15.8384	15.9986
FBXO44	13.6786	13.3532	15.7104	16.8652	17.9872	17.9636	19.2413	18.6369	19.282	11.5132	12.6081	15.9461	16.3064	16.5509	15.016	16.3781	16.9851	17.6345
FBXO6	20.3209	20.1904	23.5656	21.2977	22.1636	23.8137	20.1135	19.1863	21.9065	19.3579	20.9869	18.4492	24.008	23.8969	23.0042	22.9176	23.8651	21.1025
MAD2L2	41.3172	47.9063	53.7149	35.298	31.2758	36.5949	27.3482	26.0326	30.4227	37.9821	39.6198	37.0839	29.1424	27.7913	27.4129	24.2137	25.8718	23.7852
AGTRAP	38.2212	41.4362	52.2166	34.7575	35.4048	34.5601	38.1233	34.4847	35.6182	47.7457	46.4027	45.196	40.8849	36.819	34.2662	43.184	45.4369	37.2646
C1orf167	2.98339	4.17574	3.85948	4.91902	4.65104	4.48295	1.94978	2.28207	4.01709	4.96646	4.26921	4.95997	4.3262	5.17767	3.79765	2.00308	2.65168	1.86487
MTHFR	39.347	38.3618	30.2402	66.4879	66.4434	48.4858	65.3689	62.8838	54.2575	40.1832	30.2435	41.2558	49.68	51.8652	58.8418	53.0227	48.9486	61.5734
CLCN6	14.9733	14.1333	14.5752	13.3516	15.3769	12.6222	11.3908	14.0305	12.0513	13.2627	13.6455	13.9528	12.313	13.8514	14.5358	11.7828	12.5417	11.5491
KIAA2013	69.969	70.5287	64.5215	84.5423	78.7829	71.3139	81.9934	71.9276	73.2717	75.6256	65.2351	77.1808	81.1519	74.4788	75.953	76.1759	81.0555	80.9418
PLOD1	106.558	106.183	85.4081	108.813	110.676	98.5295	108.418	102.228	94.5355	104.07	99.9473	109.119	103.353	105.987	112.576	104.337	107.286	109.504
MFN2	128.511	139.818	109.337	137.841	136.684	127.939	134.945	134.473	122.762	135.449	126.72	143.283	127.647	128.822	140.819	119.655	128.427	155.177
MIIP	16.4368	20.4657	20.9774	12.4327	13.9531	14.0529	11.1343	10.6919	12.4262	15.8588	18.0743	16.8268	13.3589	15.3117	12.1787	12.7254	13.3301	10.9929
VPS13D	128.061	95.8585	58.5279	118.327	117.367	91.9482	133.509	127.035	94.3212	80.6485	78.6412	141.058	91.8961	74.6116	134.402	98.2687	102.986	169.441
DHRS3	15.9865	12.5272	16.7547	9.24343	8.49526	9.34743	15.0851	14.0305	15.4792	15.4073	14.8425	11.8668	12.2655	12.6123	10.258	16.6727	23.6501	18.5832
PRDM2	76.6113	68.9686	47.1311	89.5154	87.99	72.7128	94.513	97.115	83.8232	60.8956	48.2779	68.327	61.47	58.1492	80.1872	63.804	61.4187	88.4994
KAZN	12.1587	12.5731	10.8974	21.7302	19.0787	18.3133	13.0327	12.7205	14.5686	8.80418	8.89751	10.0126	14.4999	14.3824	14.6668	5.71467	6.0917	8.60457
TMEM51	4.05291	4.17574	5.40328	1.94599	2.37298	2.25737	1.79585	1.69043	1.87464	3.89416	4.26921	3.70839	2.42457	2.21268	2.26986	3.00462	2.43668	2.84638
FHAD1	1.40726	1.92727	1.36217	2.37843	2.42044	2.95684	1.23144	1.77495	1.01766	1.63667	1.31667	2.54952	2.89998	3.14201	3.57939	3.71159	2.50835	3.17355
EFHD2	55.4461	54.4682	51.9895	25.4059	27.7638	28.5828	30.3242	26.3284	26.7806	58.0737	61.325	68.3734	33.3735	31.3316	35.2265	37.2337	32.4652	36.0214
CASP9	13.6786	10.4164	9.26276	20.7572	18.8889	20.3481	20.0109	21.9755	21.1031	11.7389	10.0945	11.4496	15.1655	20.4009	17.5914	19.0293	20.4968	18.3869
DNAJC16	26.9631	23.6778	24.5191	33.6764	34.5031	36.3405	32.0688	32.4139	34.0113	27.1462	26.5728	29.1572	35.2752	33.4115	38.0202	32.5206	35.4036	36.414
AGMAT	6.07937	5.00171	5.72112	3.1352	3.22725	3.11581	3.02729	2.5779	3.8564	5.41796	7.82023	6.67509	4.13604	4.69088	3.44844	3.41702	4.30003	4.22049
DDI2	80.4953	66.766	50.1279	82.3801	70.8571	59.4865	93.2303	81.6053	79.217	75.8514	57.6941	85.9882	68.0307	58.813	82.8935	78.2379	73.1005	107.017
PLEKHM2	54.9958	53.3669	45.6781	56.7039	60.7957	55.0672	65.5229	61.1511	59.1851	55.9855	48.1981	56.4602	51.7718	50.3606	56.4409	53.1994	53.392	60.8863
FBLIM1	24.2049	21.4294	19.1612	41.2982	33.8387	32.1437	49.3602	37.1894	44.0808	24.663	17.4359	23.3165	28.049	22.3481	26.6272	32.5206	28.1652	34.3528
UQCRHL	8.33099	6.8372	8.94492	5.89201	5.74261	6.61315	6.56768	4.98676	6.58802	7.78831	8.81771	5.88706	7.03601	6.81506	5.06353	6.59838	7.09504	5.10385
SPEN	51.4495	46.805	36.0975	38.5413	43.6628	30.3315	38.6877	45.5147	36.7965	33.8622	37.1062	56.2284	30.8539	25.9326	38.8059	33.3454	30.3869	37.5264
ZBTB17	23.9797	25.6051	23.5656	26.8114	28.0961	27.4382	28.4257	29.4979	28.7624	25.6224	22.2637	28.5546	22.1064	24.782	24.3137	24.9207	24.2235	27.7767
SRARP	67.3797	66.3989	70.1972	115.462	129.422	110.23	66.9596	76.0692	74.825	108.698	94.3215	84.922	242.172	224.808	196.125	147.403	172.789	134.63
FAM131C	0.900647	1.19307	1.45298	0.324331	0.616974	0.540498	0.56441	0.380346	0.267806	0.451496	0.997478	1.11252	0.618028	0.354029	0.523814	0.294571	0.50167	0.229019
EPHA2	11.3707	19.0432	11.0336	5.94607	8.16304	6.10444	3.69432	3.88798	3.74928	4.91002	6.70305	7.185	2.28195	2.30119	3.71035	1.11937	1.21834	1.9303
ARHGEF19	79.7073	83.1018	75.6913	56.866	57.2837	53.8272	60.6484	68.8848	54.7395	78.7297	74.5316	81.8626	53.5783	55.8923	53.1671	59.3265	62.9954	61.0499
CPLANE2	7.0926	9.13157	7.53735	8.97316	9.49191	8.61617	9.44104	10.4384	8.78403	10.328	8.93741	10.4762	9.36551	8.40819	9.90881	11.2526	11.1801	12.5633
FBXO42	39.347	40.7938	33.5548	43.136	40.8152	43.7485	41.9203	41.8803	40.4387	36.1197	40.2183	40.1896	38.603	39.5627	41.5122	33.7578	39.6319	38.377
SZRD1	176.527	172.536	163.915	166.436	152.298	146.475	161.473	159.618	151.525	175.576	169.332	165.209	162.494	166.305	156.97	154.001	165.766	167.969
NECAP2	52.8567	53.5046	59.1182	54.9201	50.7817	55.4487	63.2139	60.6018	66.2016	52.8251	52.0684	46.1694	58.475	50.8031	48.5401	67.1621	65.6471	58.5634
NBPF1	139.431	146.289	87.3152	151.517	171.092	142.214	118.577	128.134	108.89	123.71	119.498	154.362	120.801	128.07	152.91	80.0054	83.0622	101.521
CROCC	32.3107	35.9297	34.2359	26.1627	36.2591	23.146	30.9399	37.4429	27.9589	25.1145	24.3784	37.1302	22.2966	20.3124	25.3177	22.0928	18.7051	22.0185
MFAP2	17.5626	14.9134	15.9828	10.1083	9.39699	9.18846	13.7511	11.3681	13.176	12.134	12.8475	13.1184	6.98847	5.92998	6.67863	6.42164	6.16337	7.09959
ATP13A2	92.4289	109.9	81.9573	123.3	127.809	103.426	85.4312	77.8864	70.0045	99.8371	98.1918	117.092	109.676	121.52	138.505	63.5094	75.4655	79.0442
SDHB	75.2603	82.1841	100.801	59.5688	63.8331	63.9377	51.7205	57.9393	61.6489	79.4069	91.2094	75.6974	72.4519	73.5495	63.8616	62.449	76.5405	57.7128
PADI2	43.8503	38.0864	22.7028	66.8122	68.2943	46.5782	47.4104	43.3594	32.833	18.342	16.5581	22.0185	30.3309	37.7926	31.909	20.4432	24.0085	23.5889
ARHGEF10L	52.4627	55.5236	42.3181	81.1909	88.1324	77.005	42.536	43.0636	39.9566	43.6258	42.732	53.5398	58.0471	66.5574	76.3459	22.1517	26.3018	32.1935
KLHDC7A	44.2443	42.9964	31.6024	57.785	55.1005	46.7054	51.6692	52.7413	48.0979	47.2378	43.0911	51.871	60.6619	71.8236	69.5363	54.2599	56.1153	62.6857
ALDH4A1	84.7734	82.9642	59.2998	136.219	118.601	100.087	187.179	159.534	147.936	102.603	73.2149	76.9027	120.801	119.529	106.029	148.817	141.471	145.918
IFFO2	10.6389	10.4623	6.08436	10.5948	10.9632	9.41102	11.4421	10.1848	9.58745	7.90119	6.50356	7.23135	8.55732	8.0099	9.42865	6.95187	6.52171	9.16076
UBR4	120.236	84.7997	54.9409	85.4072	93.5428	57.3881	95.4366	85.2397	58.3281	60.4441	51.1108	120.801	63.6569	41.5541	94.4611	54.9669	64.4287	111.336
EMC1	86.0118	85.1668	61.0253	90.5965	93.875	75.161	85.1746	84.9016	70.9686	84.5991	83.3094	101.378	81.5322	84.2589	99.3937	69.9311	81.5572	94.094
MRTO4	75.3166	76.8612	88.8135	44.4334	42.6661	51.7924	39.9705	37.4429	46.7053	66.5957	84.1872	70.552	46.6374	50.9359	50.2425	42.0058	43.5736	40.5691
AKR7A3	7.6555	8.25971	9.35357	9.24343	8.63764	8.87052	6.20851	8.07178	8.24842	6.71601	6.98235	5.97977	6.37045	8.36393	6.15481	3.47593	3.79836	3.00996
AKR7A2	93.6673	109.303	104.433	95.2993	98.526	98.2434	88.0993	87.1837	88.9116	105.65	105.533	105.457	105.303	113.776	102.668	90.4332	100.621	87.5506
SLC66A1	18.5196	20.5116	19.3882	18.4869	21.3568	18.1544	20.2161	17.0733	18.5857	23.1956	21.0667	22.7602	18.8261	21.5073	18.9883	20.7378	19.8518	20.8407
CAPZB	231.41	242.055	207.958	231.464	250.871	243.319	231.049	228.841	235.509	242.115	250.527	241.509	257.147	302.916	280.633	242.844	261.012	237.983
MICOS10	31.016	36.8934	50.6274	30.8114	30.564	35.6093	23.8592	23.1166	29.5122	34.5395	43.4502	34.6271	38.6505	40.3593	31.1669	26.8648	26.0152	20.2518
NBL1	82.9721	115.819	93.2179	47.7848	76.22	56.8158	22.7303	21.2994	17.9966	84.1476	123.967	124.787	78.0617	128.955	101.62	19.913	29.5269	24.3414
TMCO4	55.5024	57.1755	44.543	69.7312	68.4367	65.1777	75.0665	77.8018	72.254	63.661	54.0633	55.3013	73.3077	74.0805	68.2268	75.9403	75.8955	72.6644
OTUD3	15.4799	18.7679	13.7579	13.5138	15.8515	13.0991	13.4945	14.0305	13.1225	14.0528	15.3213	17.5685	11.6475	12.4795	14.6231	9.89757	9.53173	13.1195
UBXN10	1.97017	1.10129	1.5892	2.75681	4.03406	4.48295	3.23253	3.50763	2.99943	2.08817	2.79294	2.3641	5.46717	5.44319	6.02386	5.4201	6.0917	5.75819
CAMK2N1	96.8759	84.7538	93.9444	114.435	113.333	101.486	163.833	165.831	159.719	104.634	100.705	100.497	135.158	130.946	118.295	183.105	194.935	174.349
MUL1	39.9099	40.1514	37.3235	49.2983	46.4154	49.0581	53.619	50.5437	53.5612	41.9892	38.6224	37.5011	49.2521	48.679	47.3179	50.4305	52.317	49.1082
PINK1	31.5789	30.102	25.745	63.7851	53.5344	57.9286	54.0807	53.4175	52.3828	36.2326	26.5329	34.488	57.5717	51.998	59.0164	51.2553	49.5936	58.0399
PINK1-AS	3.20856	2.98267	3.1784	3.51359	3.70185	3.56093	4.51528	5.28258	5.03475	2.53967	2.79294	3.24484	3.09014	2.83223	3.9286	3.65267	3.29669	4.97298
DDOST	218.97	211.724	240.196	208.383	203.507	209.808	233.204	222.967	239.365	223.265	223.675	208.272	214.551	217.418	199.442	239.486	252.627	218.353
KIF17	0.900647	0.688309	0.726491	0.918938	1.37633	0.763055	0.82096	1.26782	0.964101	0.790119	0.718184	1.11252	0.903272	1.01783	1.35319	0.942626	0.931672	1.21053
HP1BP3	238.84	233.153	242.512	174.868	181.675	187.807	166.347	181.087	185.161	200.239	216.572	225.424	164.918	163.473	175.958	160.541	147.993	167.707
EIF4G3	100.535	92.8758	61.7517	90.5424	103.035	84.9217	86.2521	96.2275	76.6996	85.3328	73.5341	107.126	74.1159	78.3731	109.521	75.5279	73.6738	99.9831
ECE1	66.0287	64.5175	45.4511	70.3798	77.454	68.5478	41.9203	41.6267	33.2079	62.9837	60.5669	74.1677	72.3093	80.0548	97.0365	44.8926	44.7919	56.8294
NBPF3	40.8669	39.7843	41.2738	41.7846	43.3306	44.4798	37.2511	41.2041	42.0991	39.5059	43.7294	40.236	44.8308	51.998	44.4805	41.9468	39.4169	43.808
ALPL	0.450324	0.596534	0.408651	0.486497	0.522055	0.763055	0.15393	0.422606	0.374928	0.395059	0.398991	0.695322	0.855732	1.01783	1.7897	0.883712	1.07501	0.588906
RAP1GAP	11.7084	11.4718	8.85411	7.72989	7.68845	6.83571	7.08078	7.01527	6.10597	9.65073	7.86013	9.82722	6.89339	6.6823	7.15879	6.77512	5.73337	7.52491
USP48	66.2539	64.7928	53.3517	60.0553	66.0637	61.8711	59.2117	66.7296	61.8632	60.952	57.4946	62.3472	56.1455	59.7866	63.3815	58.3839	55.8287	58.9887
HSPG2	53.1382	45.7037	30.0132	42.2171	48.8833	27.0567	48.0775	36.0483	27.3162	17.8905	17.1167	35.6932	13.3114	8.36393	20.4724	10.6045	13.2584	22.1167
LINC00339	9.96341	12.1601	17.9353	9.4056	9.96651	10.5874	9.54366	9.88899	11.9441	11.4567	13.1268	10.4762	10.1262	9.60303	7.72625	12.372	11.9684	9.45521
CDC42	393.808	387.059	497.465	491.47	453.001	503.998	469.948	458.317	519.169	434.452	447.748	356.144	544.721	547.948	475.143	530.109	562.085	414.295
WNT4	7.43034	6.19478	7.49194	11.9462	13.2412	13.2899	6.6703	6.21231	6.58802	7.95762	9.65559	7.88032	14.595	18.0112	14.9287	10.2511	10.1767	9.29162
ZBTB40	71.4326	70.3452	50.8998	73.5691	79.827	66.2904	60.3406	58.1506	52.1686	63.153	58.9709	84.3658	59.9963	61.4683	81.584	46.8956	42.7136	56.2405
EPHB2	5.79792	3.71687	3.85948	6.43257	5.69515	5.11883	4.77183	4.31059	4.17777	1.9753	2.19445	2.96671	1.71146	2.61096	2.31351	2.17982	2.07835	1.99574
KDM1A	145.342	147.941	124.684	102.002	101.706	100.437	107.597	103.877	102.57	127.999	131.388	137.674	91.5157	92.4015	98.477	89.9029	88.3656	96.875
LUZP1	49.8733	51.3937	30.2402	58.758	53.8666	50.2981	63.4705	62.5458	59.9885	41.7634	33.1163	44.6397	36.844	33.146	44.9607	36.5857	34.6152	49.4354
RPL11	383.563	363.519	494.014	407.63	405.684	403.243	394.882	385.206	438.077	423.221	417.385	363.515	447.357	465.017	377.801	480.386	531.77	332.895
ELOA-AS1	3.5463	3.258	4.13192	2.75681	3.36963	3.1794	2.92467	2.62016	2.24957	2.70898	3.03233	2.3641	3.09014	2.96499	2.09526	2.94571	2.65168	2.15932
ELOA	75.5981	71.0794	62.1604	75.7313	72.6131	71.6954	72.1419	73.3222	71.6649	80.5357	73.7336	76.7636	81.0568	77.5323	84.0285	85.1898	77.1855	95.0756
PITHD1	56.7408	55.5695	55.8036	52.5957	52.3004	56.5933	54.0294	49.1069	56.7748	64.1689	60.4871	58.9633	68.8864	65.8936	61.941	65.2179	63.9271	61.2462
LYPLA2	86.5184	85.7174	79.5962	95.3533	94.2547	88.6098	99.5927	88.9164	91.9645	99.7242	88.9352	97.855	110.389	108.687	109.302	113.704	125.274	110.812
GALE	34.9564	40.9773	45.1787	25.514	27.6215	27.1203	23.8592	25.9903	27.102	43.0615	43.7294	43.1563	38.7456	34.6948	31.3852	32.3438	31.8919	27.7767
HMGCL	45.9893	40.4726	51.3992	59.4607	56.5718	59.6455	64.0862	64.6588	64.5948	52.8815	46.7219	44.4543	64.1799	63.0614	56.4409	72.052	72.7421	61.8678
FUCA1	31.6915	25.238	28.424	42.7576	40.8152	45.37	45.358	50.7973	53.3469	39.9574	33.2759	36.7594	57.6193	58.0165	60.1949	71.8163	78.9055	79.7967
PNRC2	159.189	141.379	200.375	155.355	156.901	179.127	141.564	158.604	170.378	168.352	177.711	150.375	209.274	227.419	202.978	225.288	227.113	195.582
SRSF10	163.524	170.242	196.107	127.03	139.484	145.966	126.325	144.658	140.866	156.613	191.715	158.487	147.471	155.994	146.973	150.054	157.596	142.973
IL22RA1	2.08275	2.61557	1.68001	0.324331	0.522055	0.254352	0.20524	0.169043	0	1.35449	1.27677	1.25158	0.142622	0.132761	0.305558	0	0.286668	0.098151
IFNLR1	12.4965	12.2978	11.2152	12.5408	10.014	11.2233	13.3919	11.4104	12.9618	11.231	11.9298	12.0523	9.27042	8.89498	9.34135	9.72083	7.59671	9.29162
GRHL3	16.9434	14.3168	11.7147	18.1625	15.9464	15.5473	21.7554	16.693	15.747	13.2063	12.7677	13.8137	10.5065	10.4881	11.1747	8.83712	9.60339	8.67
STPG1	19.3639	17.896	14.1666	20.8112	21.3568	20.8568	20.2161	20.3274	17.7288	17.7777	16.3985	18.2174	21.2031	21.2417	23.5716	19.0293	23.2918	19.9246
NIPAL3	124.346	122.29	108.293	252.33	251.441	248.597	239.053	254.24	250.184	155.992	127.558	132.297	233.71	242.864	235.629	230.06	245.603	254.015
RCAN3	52.125	52.6327	48.2209	53.3525	53.5344	54.0816	48.8471	49.3604	53.5076	48.9873	50.1532	51.1757	46.0669	47.2186	49.7623	41.0631	46.0103	50.9076
NCMAP	2.08275	2.70735	2.67894	3.02709	2.70519	2.89325	4.00218	4.9445	5.03475	2.14461	1.91516	2.41045	3.2803	2.4782	2.88098	5.47901	5.08837	5.0057
SRRM1	121.306	125.318	85.726	100.651	117.273	89.1185	99.798	106.032	84.6267	110.617	105.653	130.118	88.3305	94.9682	116.68	77.8845	81.2705	98.5436
CLIC4	197.467	200.068	209.911	189.517	171.376	187.616	188.256	188.482	204.925	189.121	198.937	175.036	175.282	165.42	164.783	191.589	180.314	177.653
SYF2	45.7641	37.031	40.4565	49.0821	44.4221	57.5471	51.6692	55.4882	55.5965	40.9733	42.6921	36.8521	52.7701	56.6446	51.3774	59.68	59.5554	50.9403
RSRP1	14.3541	20.741	37.3235	12.1084	17.1804	16.1831	11.0317	16.9888	17.5681	13.7706	16.8374	21.9258	16.4491	14.3382	13.0517	15.3766	12.1117	10.3059
TMEM50A	85.8992	78.8802	96.0785	94.7587	90.1257	98.148	99.4901	100.285	109.158	87.6467	87.6983	73.2406	103.971	102.403	93.1079	108.991	120.114	94.7157
RHCE	0.562904	0.275324	0.363246	0.648662	0.949191	1.46252	0.61572	0.63391	0.856979	0.507933	0.47879	0.185419	1.71146	1.06209	1.00398	1.2372	1.14667	1.01423
MACO1	44.582	35.1955	36.4154	61.5688	62.0296	58.183	76.7085	74.5478	73.2717	46.5041	41.136	40.7922	66.4618	67.7523	65.0402	74.9977	69.3738	82.6104
LDLRAP1	60.0056	64.6552	50.4457	66.2176	68.8164	62.2844	53.4137	51.4735	48.6335	61.6857	55.779	59.1951	68.9815	73.9478	69.4053	57.5002	58.122	59.185
MAN1C1	4.95356	5.55236	3.45083	39.4062	47.8867	43.526	9.7489	9.46638	9.1054	5.0229	4.18941	4.58913	32.1375	40.0053	43.0837	9.54409	11.6101	12.7596
SELENON	91.1905	88.746	71.6502	96.2723	108.303	86.0663	86.0469	77.0834	68.6119	74.3276	73.8533	90.2528	82.0076	92.8441	101.882	71.6985	81.9872	89.4155
MTFR1L	38.7841	38.9124	47.9484	46.1091	51.2089	50.8386	49.7194	53.7978	56.882	39.901	41.4552	39.0308	50.4406	48.679	49.1075	57.618	56.402	49.7952
AUNIP	15.3673	15.5558	15.3925	9.67588	9.68175	9.53819	6.61899	5.07128	6.37378	14.3914	18.3536	15.158	11.4098	11.1077	10.5199	7.06969	8.52839	8.37555
PAQR7	27.3009	23.8614	20.478	32.7574	33.981	30.0135	34.8908	36.0906	33.7435	29.9116	23.1814	26.2368	35.2276	36.5977	36.667	34.7593	36.1202	36.5776
STMN1	367.633	383.893	516.217	71.0285	63.0737	78.1814	90.9726	82.1969	103.641	334.333	402.502	320.914	67.4602	65.1413	57.3576	85.1898	90.5872	67.5279
PAFAH2	50.3237	46.7591	50.8544	52.5957	51.2089	52.6508	60.3406	63.8558	66.3087	56.4935	54.5022	45.1032	58.0947	58.636	51.683	69.283	71.6671	66.5463
EXTL1	2.70194	2.43203	1.63461	5.24335	5.22055	4.64192	8.26091	7.05753	6.74871	3.32979	2.67324	2.78129	3.89833	4.42536	4.14686	5.89141	6.52171	4.84211
PDIK1L	20.9963	19.3644	21.7039	18.7571	18.177	19.1082	21.191	21.2148	19.8712	24.2679	23.5804	18.7273	24.0556	23.7199	20.9962	26.6292	26.3018	23.3272
ZNF593	23.3042	24.2285	30.104	25.1357	22.4009	23.2096	19.703	19.1863	20.3532	22.9134	26.4531	20.2107	28.0014	25.9769	20.2105	25.392	24.7252	21.4951
CNKSR1	48.9727	44.7401	39.0943	53.6227	57.5684	46.8961	53.1059	54.8543	48.7407	46.7299	40.338	48.3944	48.1587	47.7496	56.5282	51.4909	48.0886	55.9133
CEP85	57.9792	60.5712	56.1668	27.8925	27.3367	27.629	21.5502	22.4404	24.6917	47.915	53.9835	58.268	28.8572	26.5964	30.032	24.9207	23.0051	27.2532
SH3BGRL3	39.7973	34.7367	32.6921	44.8658	46.7002	43.9711	46.3842	39.3869	46.6518	37.6999	34.8319	32.4484	45.2587	43.9881	45.0916	42.8306	44.4336	38.7042
UBXN11	15.9865	16.29	21.7493	12.6489	15.0921	15.1657	11.9552	15.6787	14.2473	15.8024	16.997	19.7935	14.4524	15.9756	15.7144	16.7905	16.0534	15.2461
CRYBG2	41.4861	44.0977	28.6056	52.5957	58.1854	43.6531	44.691	45.2611	36.9037	29.2908	28.2885	30.8723	30.6162	33.5	40.0718	22.0339	26.5168	27.1878
LIN28A	151.984	196.076	208.231	63.4067	68.4841	62.2526	59.8788	67.0254	56.507	132.909	167.856	157.606	79.1552	87.8434	71.5006	93.4378	73.8171	68.1495
DHDDS	55.7838	53.2292	44.9062	61.6229	63.5483	58.6281	61.5207	60.7285	57.9532	55.9855	50.7916	52.5664	63.229	67.7965	64.4291	63.2148	63.2104	65.4013
HMGN2	481.734	521.004	689.44	293.033	267.007	285.16	292.929	290.88	314.672	510.924	551.127	452.609	325.511	304.332	257.062	365.739	365.216	260.525
ARID1A	55.7838	45.7955	37.0965	46.7037	51.3512	40.2194	51.4639	50.755	41.6706	38.998	36.4279	52.4737	34.6571	35.8454	44.2186	40.0027	37.4819	44.2006
PIGV	24.3738	25.4215	26.6986	19.622	22.0212	20.2846	20.1648	24.0463	23.1384	26.6383	27.9693	22.5284	24.7211	24.0297	22.0875	28.1609	27.9502	21.9858
ZDHHC18	35.9696	38.7747	33.8727	28.379	28.6656	24.2588	29.8111	26.7087	27.5304	38.6029	36.1087	37.7792	24.531	26.8619	26.6709	26.9827	25.5852	27.6131
SFN	155.643	165.332	153.789	71.2988	72.9453	67.9755	60.8024	61.5738	58.3817	125.516	129.592	119.92	60.1389	62.5304	52.9925	51.0196	55.327	46.5236
GPN2	31.6915	32.6717	31.3753	36.5954	37.3507	34.4329	36.6353	36.2596	35.4575	34.5959	33.3557	36.2958	36.0358	34.6948	34.3971	39.8849	36.4069	37.5918
GPATCH3	20.4334	19.3644	17.572	22.7572	19.6008	20.6343	22.4225	20.5809	22.6564	18.9628	19.2713	20.5815	21.9162	20.7992	22.3494	22.5641	22.2885	20.1209
NUDC	187.166	188.138	153.698	134.003	141.477	140.434	132.175	136.967	126.886	185.96	192.753	196.405	139.627	154.135	159.851	141.217	146.631	148.666
KDF1	30.0591	32.1211	31.3753	30.1628	28.6181	28.8689	32.4279	32.1603	30.7441	33.58	33.635	33.5609	32.3276	35.6684	29.2463	38.1174	35.4036	31.0157
TRNP1	5.46017	4.03808	4.26814	5.13524	4.4612	4.51474	6.25982	4.1838	4.71338	4.45853	4.5884	4.54277	4.46882	4.64663	4.14686	3.59376	4.08503	2.97725
TENT5B	74.81	76.6776	76.1908	125.894	116.371	115.221	140.949	129.402	137.866	101.022	83.3892	93.7758	126.03	116.298	118.513	125.664	134.018	129.788
SLC9A1	115.17	96.455	67.6091	173.841	156.901	129.688	210.73	185.778	175.091	97.1281	68.7063	102.491	130.832	111.386	150.291	142.749	155.231	182.593
WDTC1	104.025	98.5658	71.2869	120.921	128.758	109.371	124.068	120.654	107.872	100.909	79.5988	104.947	112.576	107.979	126.326	101.863	100.979	124.75
TMEM222	53.0819	53.2292	58.7096	59.731	56.904	55.7666	63.727	62.9261	65.8802	62.1936	59.9285	62.7644	66.7946	60.4504	63.818	75.5868	74.3905	64.5833
SYTL1	67.3797	72.7772	83.274	57.1904	63.928	58.5327	63.3679	66.6028	67.38	60.5569	57.1356	61.7446	52.9603	49.7853	42.8218	50.6072	50.9553	44.1352
MAP3K6	22.6288	27.8536	19.3428	17.0814	17.56	13.9576	17.702	17.2423	13.9259	21.3332	17.9147	28.091	13.8819	12.1697	15.1906	12.313	13.3301	15.8677
CD164L2	1.745	2.1567	3.40543	1.72977	2.32552	2.32096	2.10371	1.81721	2.03532	1.58024	2.19445	2.45681	1.99671	2.25693	2.66272	2.12091	2.65168	1.9303
WASF2	189.248	178.272	119.826	173.571	180.868	144.79	192.618	184.975	151.203	174.334	137.891	184.77	144.809	140.417	176.394	145.223	153.511	196.236
AHDC1	42.3867	41.115	31.1029	46.9199	48.7884	38.1846	44.024	35.6257	40.5458	34.5395	26.1339	44.7788	32.9457	28.4108	40.0281	25.8633	25.0118	34.5164
FGR	0	0.0458873	0.0454057	1.13516	1.23395	1.46252	0	0	0	0	0.199496	0.0463548	1.09343	1.63738	2.18256	0	0	0
IFI6	12.6654	7.66317	8.40005	25.5681	20.0754	18.7267	40.9454	24.3844	28.0125	19.6401	15.042	13.0721	32.0899	23.9412	24.1827	63.4505	54.467	31.8663
FAM76A	12.6091	14.0874	18.1623	11.4056	11.0581	12.4314	12.1605	14.1151	13.0154	13.2063	15.4809	12.1913	14.7851	11.8157	9.82151	14.6696	12.5417	12.6288
STX12	40.0788	40.2431	43.0446	53.893	51.3987	58.7553	55.9279	61.447	61.274	45.2625	47.081	38.4282	56.6684	58.0607	53.5163	61.6242	56.5454	57.7782
PPP1R8	75.5418	76.2646	89.8579	66.4879	66.7756	75.1292	66.2412	65.0814	70.7543	79.6327	89.4937	72.8234	73.9732	74.1248	71.7188	76.117	76.2538	67.1025
RPA2	61.8069	63.2327	72.0588	43.6225	46.4629	53.0641	46.7434	44.754	46.9732	65.5798	72.5765	58.1753	56.8586	55.7153	52.556	55.556	60.702	48.9446
SMPDL3B	28.483	23.219	27.2434	27.46	30.3741	26.9295	29.8624	30.0051	32.7259	24.1551	23.5405	22.8066	23.7703	26.1539	23.2661	23.5656	25.2268	22.2475
XKR8	7.37405	9.40689	8.89952	8.48666	9.34953	8.23464	6.51637	6.84622	7.01651	7.28038	8.69801	9.41003	7.55896	8.31968	8.16277	6.65729	7.95505	6.67426
EYA3	27.7512	28.5419	26.5623	23.8924	24.584	22.7327	20.6779	23.1588	19.9783	23.9857	26.2536	31.2432	20.2048	22.9676	28.6352	17.9099	18.1318	23.9488
PTAFR	6.36082	6.56188	5.85733	6.48662	5.55277	6.10444	4.97707	5.53614	5.03475	2.82185	1.59597	1.99326	1.47376	2.03567	2.0516	1.94417	1.79168	2.25747
PHACTR4	100.31	90.1685	73.2394	87.245	88.2273	77.5773	82.9683	94.9174	84.3053	79.7455	78.721	94.2394	71.9765	75.4524	81.0165	73.5837	70.3771	80.0912
RCC1	109.035	114.672	108.701	68.542	63.2161	69.1837	79.12	81.3517	85.1087	93.3469	98.0322	95.3519	56.6684	57.3527	62.0719	62.3311	60.4154	68.6402
SNHG3	29.0459	33.1306	55.5766	11.2975	12.5768	12.495	8.36353	8.40987	10.4444	19.4708	31.2011	28.2301	10.1262	9.11624	11.6549	6.71621	7.74005	5.98721
TRNAU1AP	38.4464	38.0405	53.7603	34.0007	30.7538	38.121	32.8384	33.9353	39.1532	36.2326	42.2133	33.2828	32.5653	32.2166	28.3733	37.1748	33.4685	29.6416
SNHG12	6.58598	8.25971	15.1201	2.21626	3.55947	3.52913	2.61681	3.29633	3.69572	4.06347	6.02477	6.99958	3.42293	2.21268	2.88098	2.12091	1.79168	1.99574
TAF12	42.3867	39.8301	49.7192	33.0818	31.5606	37.2307	32.0174	36.5555	37.225	37.3049	44.8466	37.4547	34.1342	38.5449	32.4765	38.412	41.4953	32.3244
GMEB1	21.4467	23.4025	16.2098	19.2436	16.8956	16.0242	21.6528	19.1018	20.0319	21.8411	19.2314	19.1445	15.0228	16.0641	16.2382	17.4386	17.7018	20.579
YTHDF2	144.892	140.14	127.091	146.381	142.996	141.992	145.259	139.418	145.097	139.625	141.083	132.158	141.956	140.948	149.2	141.688	138.819	138.916
EPB41	56.2342	51.3937	38.3678	60.3256	62.4568	57.3881	58.1342	62.8838	52.7042	51.9785	47.7194	64.2014	50.9636	54.1222	62.9886	49.2522	49.2353	60.5264
TMEM200B	1.97017	1.83549	2.3611	1.35138	1.04411	1.49432	0.92358	1.14104	1.23191	1.9753	1.47627	2.13232	2.61474	2.07992	2.44446	4.06507	2.36501	2.84638
SRSF4	83.3099	89.2966	70.8783	45.4604	49.9749	48.8355	45.1015	54.1359	49.1156	67.3858	78.8008	78.9886	44.1653	49.1658	47.5361	47.2491	47.0136	45.2476
MECR	18.407	17.8501	20.8412	15.3517	13.8107	13.8622	12.7762	13.1853	13.176	18.1163	15.4011	17.9393	11.6475	14.4267	13.27	12.0774	14.4051	12.7269
PTPRU	92.9355	89.6178	58.2555	72.9204	77.976	59.7091	91.5884	90.142	66.523	81.2129	62.482	75.0948	59.2832	59.3441	61.4608	60.9761	65.3604	71.3885
MATN1-AS1	1.46355	1.88138	1.08974	0.756772	0.854272	1.14458	1.0262	1.09878	1.28547	0.677244	1.27677	1.62242	0.570488	1.2391	1.00398	0.765883	0.931672	1.01423
SDC3	22.8539	21.3835	16.1644	27.2979	25.6282	24.6403	37.8668	33.3859	36.6894	15.5766	13.7253	20.3034	13.3114	10.9749	16.6747	14.0216	14.1901	20.0882
PUM1	137.067	126.282	94.7163	162.922	163.735	137.223	170.76	158.773	136.849	127.209	110.241	142.217	124.937	130.327	165.612	128.904	134.161	164.926
NKAIN1	15.8739	14.9134	11.1244	3.40548	5.03071	4.67371	0.71834	0.67617	0.964101	22.9134	23.5006	26.1441	4.27866	4.33685	5.58735	0.353485	1.29001	1.07966
SNRNP40	59.7242	64.0586	69.5615	45.1361	39.7236	45.4654	43.8187	41.7958	44.5629	54.4053	65.5543	55.9966	42.1685	46.245	38.2384	44.4802	42.5703	39.0314
ZCCHC17	48.8601	46.5297	58.982	46.5415	46.4629	56.3071	44.7423	47.7123	49.8655	49.2695	53.8638	41.5803	49.4423	55.8481	52.0322	52.4336	54.1087	43.7099
SERINC2	215.761	219.754	189.841	301.736	325.003	280.073	307.963	275.708	280.5	230.263	184.334	213.742	305.686	295.039	306.126	334.573	339.559	324.978
TINAGL1	10.076	12.8025	12.532	4.75686	6.16974	6.26341	3.89956	3.71894	4.92763	7.78831	9.41619	10.2444	5.99012	5.88573	6.72228	4.12399	4.22836	6.5434
PEF1	65.0155	65.7106	65.2934	62.3256	63.1212	64.2556	68.4989	63.1374	63.2558	66.7086	63.1204	60.2149	68.8388	68.3276	65.2148	70.2845	72.8138	66.4155
COL16A1	1.06952	1.19307	1.04433	0.486497	0.949191	0.763055	0.46179	0.549388	0.749856	0.95943	0.758083	1.52971	0.855732	0.973579	0.829372	0.589141	1.50501	0.719774
ADGRB2	23.4168	30.1938	20.4326	10.3245	11.8649	10.6192	10.5186	8.917	7.33788	16.9875	16.7975	22.204	6.84585	8.71796	9.95246	7.48209	7.16671	8.8663
SPOCD1	5.68534	6.42422	5.31247	7.3515	8.78002	6.8675	4.20742	5.66293	2.8923	7.50613	8.81771	9.08555	8.8901	10.3553	7.98816	6.2449	5.8767	3.99147
PTP4A2	324.965	312.309	322.199	309.682	307.728	304.078	261.681	260.368	242.686	344.943	361.327	304.505	328.601	353.232	302.197	301.464	322.574	270.242
KHDRBS1	296.426	286.337	222.579	263.465	253.956	229.489	268.813	251.747	235.401	278.122	243.903	286.287	215.216	220.781	242.788	215.331	223.745	239.227
TMEM39B	16.5494	16.7489	15.3471	10.0543	10.3462	10.1741	11.083	10.1426	11.0336	14.5043	13.0869	15.5752	11.2671	11.5059	10.8255	11.3115	9.81839	10.6985
KPNA6	64.4526	81.2663	54.7139	105.84	102.987	88.1011	100.106	104.13	90.572	81.1	70.1028	84.922	84.9076	90.4986	101.183	81.1247	88.4372	112.481
TXLNA	131.326	140.369	95.3974	124.057	126.575	109.371	115.396	117.696	105.194	126.306	116.067	138.647	105.73	106.253	117.291	95.4409	95.8189	115.524
CCDC28B	3.94033	4.12985	5.67571	0.972993	1.51871	1.20817	1.59061	1.77495	1.07122	2.82185	3.59092	3.19848	1.66392	1.37186	1.00398	1.6496	2.07835	1.07966
IQCC	13.9037	12.8025	14.2574	7.29745	7.59353	8.20285	7.95305	8.28309	8.4091	12.0211	14.8026	13.2111	7.84421	7.9214	8.51198	11.0759	8.52839	9.88053
TMEM234	8.04953	6.42422	10.0347	7.29745	6.4545	9.18846	8.77401	9.08604	10.3909	6.77244	8.33892	7.60219	8.46223	7.25759	6.72228	9.72083	9.60339	7.95023
EIF3I	186.378	213.559	270.073	183.193	181.533	199.921	178.918	171.367	186.714	206.56	238.557	187.042	212.507	212.285	178.882	194.417	212.278	161.295
HDAC1	204.954	201.216	206.551	176.706	176.122	180.018	172.196	178.467	170.164	201.875	211.745	196.452	183.887	199.318	182.636	193.179	194.003	185.603
MARCKSL1	103.574	89.6637	89.2676	110.597	87.1357	92.4887	143.925	112.329	135.617	84.0347	73.2548	76.949	77.4912	65.6281	69.7982	90.7277	85.2122	79.3387
FAM229A	2.3642	3.57921	5.26706	2.00004	3.08487	2.98863	2.92467	3.71894	3.90997	1.69311	2.43385	2.50316	2.32949	2.03567	1.877	2.71005	2.00668	1.79943
BSDC1	72.3332	72.5478	69.0167	121.678	116.988	113.346	118.577	128.641	119.763	63.4917	59.4497	60.8175	93.2747	95.3665	89.7031	90.6099	86.9322	87.8451
ZBTB8A	18.5196	19.548	22.4758	13.2976	12.6717	12.0181	15.7522	16.8197	17.0325	16.4796	19.5905	18.3565	13.1212	12.6123	12.4842	13.727	10.9651	12.0726
ZBTB8OS	18.2381	19.8233	25.9721	15.4057	16.4685	18.3451	15.9061	18.2566	17.3003	20.7124	22.7824	19.8399	20.5376	20.5779	14.7541	19.7951	20.1385	15.148
RBBP4	221.672	231.455	246.508	200.112	195.533	220.777	209.653	209.19	213.495	218.186	238.238	206.233	194.964	192.769	189.01	202.252	195.651	185.538
SYNC	17.5063	16.7947	16.8001	17.9463	20.1229	18.6949	23.1408	25.8635	27.102	18.1163	16.6778	15.2971	18.3982	16.1968	13.8811	20.2665	17.1284	18.6814
KIAA1522	467.492	445.932	352.984	664.987	664.291	539.639	824.09	767.876	719.809	467.186	334.794	439.444	542.153	487.144	557.774	653.122	667.006	714.768
S100PBP	41.0357	45.2907	46.7225	31.6223	28.3808	31.0309	29.1441	27.2581	30.1549	40.0139	43.7693	40.5141	31.567	30.6235	29.9883	24.3315	24.2952	26.0427
TMEM54	68.6181	69.9781	74.1929	74.0015	71.0469	69.0247	85.3285	73.0264	80.556	75.0048	66.6714	70.7838	73.5454	68.5931	62.3775	86.8394	86.4305	75.4781
RNF19B	27.6949	24.7332	24.3829	21.6221	22.8755	24.6085	20.4214	20.8768	19.1213	28.8393	27.4107	28.091	25.0064	24.251	25.0558	22.2695	24.5818	23.0982
AK2	188.292	189.973	208.821	159.03	164.685	171.211	147.773	152.899	163.576	180.034	199.296	177.168	165.156	175.643	170.109	156.77	175.154	154.097
AZIN2	0.731776	0.780084	0.454057	1.13516	0.949191	1.30355	1.0262	0.507128	0.535612	0.733681	0.598487	0.695322	1.42622	0.708058	1.00398	1.06045	0.716671	0.817925
TRIM62	23.248	21.0623	15.1655	33.352	32.5573	25.6259	34.429	31.1461	30.1014	22.1798	16.2788	24.0118	25.9096	22.4366	29.7264	23.2711	23.2201	29.7397
ZNF362	20.4897	15.0969	13.3947	20.4869	21.0246	17.6775	26.9378	27.3004	23.2991	16.8182	13.845	16.8268	15.9737	15.179	16.1073	18.8525	17.3434	19.3357
PHC2	61.0751	60.8924	62.0696	66.2176	62.6941	63.3654	74.8613	67.7015	70.2187	57.34	56.4573	62.1618	67.0798	61.2912	66.6553	71.4628	64.6437	69.0328
ZSCAN20	5.2913	4.49695	4.26814	5.94607	6.35958	5.72292	5.79803	5.91649	4.82051	4.45853	3.98991	4.54277	5.03931	5.04491	5.84925	4.35964	4.8017	5.95449
SMIM12	38.7278	35.1038	46.8133	34.5413	33.981	42.1906	35.7118	34.5269	39.3675	35.2167	41.8941	31.9385	42.1685	37.9253	35.3138	38.4709	40.3486	33.5022
GJB5	11.4833	10.3246	10.8066	9.94615	11.153	12.0817	8.26091	8.57891	8.62335	14.1093	12.0495	12.145	12.0753	13.6301	10.0834	9.13169	11.4667	9.29162
GJB3	3.32114	2.98267	3.1784	1.0811	1.42379	1.11279	0.46179	0.464867	0.642734	2.37036	3.07223	3.10577	0.570488	0.929326	0.829372	0.412399	0.215001	0.490755
DLGAP3	1.51984	1.23896	0.726491	0.540552	0.522055	0.381528	0.5131	0.591649	0.482051	2.37036	2.19445	1.85419	0.570488	0.929326	0.785721	0.824798	0.931672	1.60313
TMEM35B	4.05291	3.85453	6.31139	4.59469	5.12563	5.65933	7.33733	6.84622	7.23076	5.24864	5.74547	4.35735	6.22782	5.88573	5.58735	9.42626	11.3234	7.85208
ZMYM6	25.1618	22.0259	26.9256	23.514	25.818	25.6259	22.7303	25.4832	26.5128	25.7917	26.8521	23.3165	25.3867	28.8976	25.8851	25.3331	27.3768	24.9631
ZMYM1	31.9167	38.5453	40.7743	23.7843	25.4383	26.8341	24.167	26.2016	26.2985	30.1938	40.9365	33.4218	22.6293	26.0211	24.4883	23.3889	20.9985	25.9773
SFPQ	448.691	434.507	313.299	327.088	319.403	278.483	316.275	289.95	258.486	379.765	350.434	434.716	286.623	276.762	334.499	267.765	264.595	311.139
ZMYM4	98.5083	94.0689	73.1032	124.597	119.123	115.984	127.197	117.358	113.335	93.4033	85.1447	96.9279	103.781	107.005	133.573	105.515	99.259	134.336
KIAA0319L	97.2136	98.3823	82.5476	136.814	151.349	124.346	154.597	156.998	144.24	107.795	92.3266	109.722	132.924	135.814	143.438	145.518	148.781	159.757
NCDN	50.3237	50.5678	34.2813	60.758	61.8873	52.8734	65.5742	59.672	53.6147	55.8727	43.2906	60.8639	56.3357	59.7424	66.6117	53.7297	57.047	65.0414
TFAP2E	1.745	1.74372	1.18055	2.43248	2.13568	1.62149	2.00109	1.47912	1.76752	1.86242	1.87526	2.96671	2.70982	2.61096	2.0516	2.00308	2.00668	2.25747
PSMB2	140.782	149.271	145.344	125.354	121.734	123.583	122.477	119.006	127.476	140.19	148.505	138.833	123.511	132.672	126.065	128.786	132.584	125.306
C1orf216	11.9336	11.7013	15.3925	16.2166	13.526	16.6283	13.6485	13.777	16.7646	12.6419	12.648	13.6283	15.0704	16.4181	13.5755	13.7859	13.6168	13.3158
CLSPN	30.0591	39.9678	22.5212	0.648662	0.332217	0.699468	0.92358	0.507128	0.535612	27.0898	27.7698	34.6734	0.570488	0.48679	1.26588	1.11937	0.645004	0.98151
AGO4	15.311	15.5558	12.1233	15.7841	18.1295	18.1226	14.7773	15.8477	16.229	12.5855	12.5283	15.9461	13.6442	13.9841	15.9327	14.0805	14.2618	15.9005
AGO1	45.2575	46.4379	31.1029	62.704	53.4869	50.4252	71.5261	67.1099	54.0968	47.5764	39.8991	51.6393	47.5882	50.4491	58.2306	52.9049	54.7537	68.7384
AGO3	18.2944	21.7965	18.6163	16.1625	17.5126	16.7872	16.0087	16.8197	15.1578	16.141	18.593	19.7935	14.2622	15.4003	16.762	15.3766	14.6201	18.6487
TRAPPC3	48.4661	47.1721	56.7571	50.1091	48.3613	55.7984	47.2565	52.2342	55.0609	49.3824	53.0658	45.1032	52.4373	52.6618	46.3139	58.0304	57.8354	46.4581
MAP7D1	76.4987	79.7062	61.5701	69.2447	66.0637	62.9203	72.1932	70.533	67.2728	60.2183	53.2254	66.5192	44.8308	47.8382	49.3695	49.6057	49.5936	56.0115
THRAP3	197.354	174.922	97.6677	199.68	199.283	162.69	202.161	206.95	159.398	169.988	135.258	189.267	169.34	165.73	210.399	161.307	166.554	232.356
SH3D21	1.51984	3.21211	3.90489	1.24327	2.32552	1.46252	1.38537	2.07077	1.6604	2.03173	2.51365	2.874	1.47376	1.2391	1.22223	1.59068	1.86334	1.30868
STK40	43.1185	39.9219	30.1948	57.6228	49.4054	42.5085	65.6255	59.503	59.935	44.6417	34.7521	43.5272	58.7602	50.2278	56.0917	59.9157	59.0537	67.4297
LSM10	20.546	24.1367	30.4218	22.4329	20.3601	21.5563	22.9869	20.3696	23.1384	21.051	25.6152	20.5815	24.2457	22.3923	17.9406	21.1502	22.9335	17.5363
OSCP1	9.85083	9.22334	11.9417	15.4057	16.0888	18.5359	13.905	14.7067	14.5151	12.3597	12.7677	10.9861	18.3031	19.7814	18.5517	23.2122	21.3568	19.6629
MRPS15	69.8564	71.1711	102.299	58.4877	59.3719	63.7787	54.3373	54.8543	59.8814	71.1671	78.8407	61.6519	69.1241	69.9207	55.9171	63.097	70.2338	53.3614
GRIK3	12.3839	15.0969	9.48979	5.51363	6.64434	5.75471	1.94978	2.11303	1.60684	5.41796	6.58336	7.55584	3.23276	5.26618	4.23416	1.11937	1.00334	1.96302
ZC3H12A	18.5196	18.8138	16.0282	24.8654	21.9738	21.4927	26.322	27.3426	31.3333	18.9064	14.5632	17.6612	20.1572	17.3032	17.8533	29.3392	25.0835	26.6971
MEAF6	83.535	79.385	91.0384	101.57	94.6818	105.81	117.756	130.121	139.955	71.7315	74.0129	62.579	74.4011	76.1605	71.4133	89.2549	93.0956	82.4795
SNIP1	28.9896	24.9168	22.9753	38.217	33.3641	35.7364	40.3297	40.0208	41.7242	30.476	24.937	25.078	31.3293	31.243	34.7463	32.9919	32.3935	35.6615
DNALI1	117.028	103.797	109.609	134.273	142.284	147.27	141.103	155.266	156.292	102.095	110.92	97.7623	120.42	125.503	115.457	131.32	129.431	113.659
GNL2	74.9789	80.8075	64.7031	62.5418	63.311	70.4555	58.8013	59.1649	60.7384	69.1354	81.1548	72.2672	60.6143	71.8236	72.5046	55.4382	60.272	61.8024
C1orf109	22.7976	22.2094	22.2034	17.4598	16.3261	17.6775	18.9334	18.3411	20.4068	21.6154	21.6253	20.2571	18.1605	16.9049	18.3335	19.7951	20.0668	19.9901
CDCA8	126.034	136.836	113.696	11.5678	12.8615	14.3391	10.3133	8.49439	8.46267	106.666	120.615	120.059	15.5458	15.2675	17.3295	17.6153	13.4734	16.7838
EPHA10	5.40388	6.05712	5.49409	5.29741	5.60023	5.30959	5.79803	5.3671	6.15954	5.6437	5.74547	6.48968	5.08685	5.31043	5.15084	4.5953	4.51503	5.3983
MANEAL	33.2677	35.5167	30.0132	28.5411	27.2892	24.4178	26.476	24.5534	25.2273	36.2326	36.9067	37.8255	28.2391	26.9947	29.8574	27.0416	24.1518	27.6131
YRDC	16.9997	19.8233	23.7472	15.9463	16.9905	14.6888	10.2107	12.4246	12.1048	21.5025	24.9769	19.8862	18.8261	19.7814	16.9803	15.1409	17.9884	13.1195
C1orf122	63.8897	78.7884	81.367	88.2721	80.5863	74.9702	79.1713	63.56	76.0569	85.615	69.9033	79.035	100.311	85.0554	80.0999	90.3153	96.3923	78.9461
MTF1	39.6285	33.2683	26.2899	38.8657	39.3914	36.9764	40.381	34.6115	35.2968	34.8217	28.0092	41.3949	31.8522	31.8626	42.3853	34.1113	30.4585	42.9574
INPP5B	13.7349	13.6285	16.5731	9.56777	11.5801	9.5064	10.3646	10.7765	10.8194	11.626	13.4061	12.4694	8.55732	8.80647	9.42865	8.7782	11.2517	10.9602
SF3A3	118.266	115.819	110.881	82.5422	83.6237	88.0693	91.4344	99.1857	97.4278	102.377	114.151	100.034	78.2519	85.9848	83.2864	89.9029	90.6589	82.8067
FHL3	5.79792	5.00171	5.40328	4.7028	3.79676	4.61013	4.15611	4.52189	4.33846	5.36152	4.4687	6.16519	4.65898	3.54029	3.53574	3.65267	4.51503	4.44951
UTP11	50.3237	49.3747	58.1193	37.8386	36.0218	39.9968	33.762	35.837	35.6717	53.2766	56.6967	47.6064	40.6472	39.2087	42.0361	40.6507	44.0753	34.5819
RRAGC	43.4562	44.373	40.5927	40.8657	38.8694	42.8901	43.9727	45.1766	48.5264	46.4477	43.0113	38.9381	41.8358	38.8104	40.8138	46.7778	43.8603	44.6914
MYCBP	52.2375	58.2309	73.2394	62.3256	62.5517	74.2707	62.7008	63.5177	73.2181	62.4758	73.4144	58.3607	81.5322	82.4002	72.4609	80.8891	88.5806	72.6317
RHBDL2	5.57275	5.87357	6.31139	5.51363	6.02736	5.21421	7.02947	7.60692	5.83817	6.49026	6.46366	7.32406	5.8475	6.90356	5.23814	7.24644	6.23504	6.08536
AKIRIN1	65.0155	65.6188	70.061	73.515	68.1519	80.5977	69.7303	64.9546	76.2711	63.4917	64.9558	59.1024	73.4027	71.3368	71.7188	64.0396	64.8587	65.0086
NDUFS5	100.366	101.457	135.218	98.7047	93.0682	103.648	92.7172	93.2692	108.461	105.199	121.014	92.5242	105.778	113.289	89.223	106.222	122.192	86.471
MACF1	63.2705	45.3825	30.6488	55.1903	60.1787	48.772	61.7772	54.3049	46.1162	29.6859	30.4031	61.7446	32.803	25.7113	50.8972	31.3423	32.1069	54.5065
BMP8A	1.01323	1.14718	1.13514	0.432441	0.616974	0.699468	0.5131	0.507128	0.482051	0.902993	1.03738	1.25158	0.618028	0.48679	0.916674	0.471313	0.788338	0.785208
PABPC4	259.893	272.662	218.492	223.951	238.437	199.921	215.759	207.711	183.233	246.856	226.188	259.123	178.468	188.299	197.652	162.78	168.131	182.79
PPIE	60.2871	61.3972	65.3388	49.028	53.7242	54.6221	52.0797	51.6425	52.8649	59.9926	66.7113	53.2617	55.6225	58.636	52.556	54.3777	61.4187	49.5335
BMP8B	12.3276	11.38	10.9428	10.757	10.3462	10.6192	9.80021	9.88899	8.35554	8.0705	8.33892	10.5225	7.08356	7.16908	8.16277	7.42318	8.31339	7.85208
TRIT1	25.9499	25.9263	35.5527	25.0816	26.2451	30.8084	24.3209	25.3564	27.4233	24.1551	27.8895	24.2436	27.8588	25.7999	26.1907	28.9857	24.6535	24.0797
MYCL	14.8607	12.8484	11.2606	32.9737	27.0994	28.71	38.5851	35.3722	33.7971	12.2468	7.74043	9.17826	18.9687	15.887	17.2422	26.04	23.0051	22.7383
MFSD2A	9.85083	8.67269	9.76222	4.86497	6.02736	5.2778	2.66812	3.71894	2.19601	6.49026	6.94245	7.60219	7.41634	7.74438	7.46435	5.0077	5.0167	4.77668
CAP1	370.898	361.729	323.97	383.9	383.853	384.23	400.218	388.671	386.444	357.754	349.836	332.271	384.604	406.956	393.166	388.774	425.918	408.373
PPT1	459.386	379.166	445.157	867.261	719.582	744.742	1052.32	1008.51	1126.93	510.304	433.225	362.448	755.468	713.103	616.878	979.918	1026.77	766.723
RLF	41.0357	39.6007	42.1365	49.0821	43.6153	50.9657	45.8198	45.0921	51.4723	36.8534	42.2532	38.7063	43.1194	40.8461	43.8258	42.2414	38.4852	44.9204
ZMPSTE24	124.064	123.345	150.565	151.895	140.053	165.519	142.077	140.601	164.272	149.897	168.015	124.88	185.504	190.91	166.005	172.206	187.768	158.121
COL9A2	62.0884	56.8543	48.8111	84.8126	78.8778	69.6288	91.7936	90.311	83.0198	57.0014	43.9688	53.6789	69.8847	67.354	70.322	67.5156	71.3804	73.3515
SMAP2	57.754	55.1106	47.3127	69.8933	78.5456	68.834	69.2172	70.4485	68.8261	67.2165	57.9734	62.8108	78.5847	82.4445	86.1237	68.6939	80.5538	80.2875
ZFP69B	7.37405	5.87357	5.85733	6.7569	6.35958	6.42238	8.77401	6.5504	7.28432	5.92589	6.06467	5.42351	6.0852	6.94782	6.98418	6.00924	6.30671	6.5434
EXO5	15.7613	14.2709	16.4369	11.0273	11.2479	11.9545	11.75	13.6924	14.9971	15.4637	16.3586	14.8799	12.313	12.7008	11.8731	14.2572	12.6134	11.8763
ZNF684	5.00985	4.12985	7.35572	4.05414	4.2239	5.15062	3.33515	3.84572	4.5527	3.78128	5.22679	4.26464	5.08685	5.44319	5.06353	4.5953	4.30003	4.12234
RIMS3	5.34759	6.24067	3.85948	4.10819	5.03071	3.78348	4.41266	3.38085	3.53504	3.89416	4.5485	6.07248	3.2803	3.0535	3.01193	1.6496	2.50835	2.74823
NFYC-AS1	1.06952	0.734196	1.49839	0.486497	0.237298	0.381528	0.30786	0.422606	0.267806	0.733681	1.27677	0.880742	0.380325	0.708058	0.261907	0.648055	0.573337	0.261736
NFYC	45.539	46.1167	41.8186	46.6496	52.1106	47.8817	47.5131	46.9938	45.527	50.9062	50.5522	50.3877	49.7275	56.5561	50.4607	53.7886	56.3304	49.1409
KCNQ4	2.64565	3.53332	3.63246	0.864883	0.806812	1.30355	0.66703	1.22556	0.749856	2.99116	4.26921	5.60893	1.04589	1.19485	1.22223	0.589141	0.860005	1.07966
CITED4	68.3366	68.6932	63.6134	85.5153	82.3423	66.1315	81.0185	68.2509	70.2187	79.1247	59.2901	76.8563	74.1634	63.2384	61.3299	48.2507	64.9304	49.1409
CTPS1	51.168	63.7374	54.7593	16.0544	14.3802	15.3565	10.8264	9.80447	9.85526	43.1179	55.8189	54.3742	13.0261	12.8335	16.5001	7.18752	9.31672	9.35706
SCMH1	41.7675	40.0596	36.597	34.3791	34.8353	33.9878	34.8908	34.7805	33.69	42.1585	40.2582	45.2887	38.3653	39.0317	37.7582	40.8864	43.2869	39.7839
EDN2	2.13904	2.06493	1.54379	0.972993	1.23395	0.731261	2.5655	3.08503	2.03532	2.76541	1.99496	2.31774	1.14098	1.06209	1.17858	3.41702	4.08503	3.30442
HIVEP3	18.6321	15.5099	15.1201	15.1354	15.4718	14.1483	17.9072	14.4954	14.5151	17.1004	15.0021	17.2903	14.2622	13.5859	14.5358	16.2014	13.9751	15.377
FOXJ3	70.4756	66.6742	61.3431	95.2452	90.7901	83.2048	92.6146	92.9312	86.5549	74.1583	65.6341	68.1879	85.2404	79.8335	90.2269	90.7277	87.3622	101.521
RIMKLA	2.08275	2.11081	1.49839	4.43252	3.84422	3.40196	4.56659	4.22606	4.17777	2.65254	2.43385	1.71513	3.85079	2.96499	3.53574	4.53639	4.01336	4.61309
PPCS	64.0585	56.9002	79.0059	72.2718	66.7756	78.2768	74.6047	71.8431	84.3589	72.8038	75.0104	59.8904	95.6993	94.3487	76.3895	100.507	111.657	83.2974
CCDC30	3.20856	3.53332	4.31354	3.78386	3.84422	5.46856	3.89956	4.77545	4.65982	2.31392	3.27173	3.15213	4.08849	4.2926	4.58337	5.53793	4.22836	4.74396
PPIH	32.1418	31.8458	42.2273	23.2437	22.828	27.2156	23.2947	26.5397	27.7447	29.4037	39.2607	29.9916	31.8047	32.3494	24.9685	32.5206	36.2636	27.4823
YBX1	433.999	434.736	390.217	307.574	300.372	314.76	294.16	281.878	291.641	385.07	391.011	377.328	285.434	312.696	303.201	284.85	306.52	275.542
P3H1	6.24824	5.91946	5.99355	8.97316	9.44445	9.76075	8.97925	10.0158	8.56979	4.85359	5.18689	5.37716	6.79831	7.74438	7.98816	7.77666	8.52839	9.16076
C1orf50	13.0031	12.9402	17.572	14.9192	15.6617	15.1021	15.1878	14.7912	15.0507	14.5608	15.4809	13.0721	17.0195	15.6658	14.143	17.2029	18.4901	14.4609
SVBP	7.20518	7.43374	10.5795	8.54072	7.54607	8.83873	6.97816	7.35335	8.83759	7.28038	8.77781	5.37716	9.69829	8.5852	7.72625	7.01078	9.10172	6.01993
ERMAP	20.8838	18.1255	19.8877	28.9736	31.2758	32.6206	30.0164	32.3294	32.5652	21.7283	17.396	16.6877	30.7588	30.9775	29.2899	31.9904	37.2669	33.8294
ZNF691	11.427	11.0129	12.1233	11.1894	12.3869	12.1135	13.3406	14.4531	16.3897	10.723	10.9723	8.34387	11.2196	11.86	11.393	13.9626	12.9001	11.909
SLC2A1	56.4593	59.3781	51.036	102.759	107.354	99.4198	63.7783	55.9954	60.3634	62.3065	60.4073	60.493	97.1255	94.57	98.8699	61.742	60.9887	62.2931
FAM183A	1.80129	1.51428	2.45191	2.27032	2.56282	3.84707	1.84716	2.5779	2.46381	3.10404	2.67324	2.45681	5.37209	5.08917	4.80163	7.77666	5.80504	5.66004
EBNA1BP2	93.1044	93.3806	112.061	70.1096	73.1826	80.3116	64.3427	61.9118	70.915	80.3663	96.9948	86.4981	65.7012	68.2833	63.3378	63.097	65.3604	58.5961
CFAP57	2.81452	2.20259	1.86163	4.00008	5.79007	5.08704	3.84825	4.47963	3.5886	1.80599	2.11465	3.10577	4.37374	5.35469	5.50005	6.83404	5.59003	6.67426
TMEM125	41.2046	46.0708	47.2219	49.8389	48.9783	47.9453	47.7696	46.6135	43.1703	41.0297	44.0486	40.9777	48.8718	46.8646	41.5996	40.2973	41.7103	37.0683
C1orf210	27.8638	25.7886	31.3753	31.8385	28.0011	27.8515	33.5054	33.0478	32.7259	26.469	28.5279	25.9123	29.3326	29.6499	24.1827	32.5795	36.0486	29.5762
CDC20	199.212	211.449	198.968	14.3787	15.804	18.3769	12.2631	9.71995	9.64101	158.645	187.486	170.03	19.3015	21.5515	23.6589	19.0882	20.8551	18.7468
ELOVL1	158.064	157.531	180.624	143.462	153.105	150.481	141.41	139.46	145.258	175.181	179.187	157.606	173.571	188.211	163.168	176.742	198.16	156.682
MED8	45.8767	50.063	62.8869	41.5144	45.5612	50.8386	42.3308	43.8243	47.6694	50.0597	61.4048	47.3283	53.198	59.0343	49.0202	52.6103	53.607	45.8038
SZT2	31.0723	31.7999	24.6099	27.9465	37.9202	24.7357	33.2489	33.0056	27.9054	22.0669	22.7425	33.3291	24.1506	18.144	31.9963	22.7408	22.0018	30.6885
HYI	18.3507	20.0527	18.7526	22.487	20.2652	21.1748	26.2707	29.1176	26.4057	22.8006	20.947	24.3826	29.19	29.4287	27.7185	39.0601	41.1369	35.3998
PTPRF	619.476	543.443	403.384	756.178	773.591	620.491	944.309	892.587	775.941	579.383	442.84	654.669	662.431	629.463	756.125	805.238	800.952	1004.28
KDM4A	67.7174	60.4794	45.4965	78.7584	76.0302	73.6349	91.4344	88.536	83.1805	70.7156	56.178	65.6384	76.2552	74.5231	83.3301	76.117	76.3255	96.0898
KDM4A-AS1	1.1821	1.23896	1.90704	0.378386	0.711893	0.286146	0.30786	0.507128	0.428489	0.790119	1.71566	1.20523	0.665569	0.752311	0.349209	1.6496	1.79168	1.30868
ST3GAL3	6.86743	7.29608	7.49194	6.81095	6.54942	6.39059	6.61899	6.7617	5.73105	7.11107	7.78033	6.90687	6.46553	6.81506	5.631	7.77666	9.10172	8.99717
ARTN	13.8475	22.8519	19.6153	8.70288	9.01731	8.61617	3.69432	2.95824	3.26723	9.70717	14.2839	13.4893	6.94093	7.08058	8.77388	3.12245	3.36835	3.89332
IPO13	57.5851	66.0318	51.0814	76.9205	74.7963	68.4842	70.2947	68.0396	63.8449	67.8373	55.5795	64.3405	67.1749	65.6724	74.9054	63.3327	68.7288	74.0058
DPH2	29.8902	34.4154	31.5116	30.7033	28.3808	25.7531	28.4257	25.1451	28.6552	30.3631	31.6799	31.5213	26.0047	25.0918	28.4606	24.3315	23.1485	27.2205
ATP6V0B	91.6409	112.148	171.089	103.624	99.3328	108.831	82.096	76.534	91.3754	146.285	164.983	143.051	186.169	163.65	141.604	149.465	162.254	116.505
B4GALT2	68.1114	74.7045	69.5161	51.3524	49.5952	47.6592	46.1277	37.1471	38.3498	58.0737	56.178	66.7509	37.4145	36.9518	41.5559	31.4601	34.6869	36.643
CCDC24	17.8441	19.6856	23.3839	17.4598	17.3227	16.66	14.0589	14.2841	15.8541	14.6172	15.9198	14.4164	15.7835	16.4181	13.0953	13.7859	13.8318	12.3343
SLC6A9	30.1717	32.0752	24.7007	55.5687	58.2803	56.5615	20.4214	19.8625	17.8359	23.8729	22.8223	24.9389	34.4194	31.6856	39.7662	11.9596	10.6067	14.5591
DMAP1	33.3802	38.4994	41.183	41.7846	51.3987	44.0347	37.8155	39.5982	37.3321	31.0404	37.1461	35.7859	43.7374	46.1123	42.0361	37.3515	35.4036	33.5676
ERI3	54.3766	56.9002	60.5712	53.2984	50.402	57.0702	54.6965	52.53	55.5965	59.4282	57.2952	54.2815	57.952	58.813	53.7782	60.5637	61.9204	56.2078
RNF220	56.1216	57.0838	47.1311	45.8388	45.0866	42.4132	41.4072	38.9643	41.3492	49.8903	47.3603	52.1492	41.1227	37.7483	38.6749	37.2926	34.9736	38.9986
TMEM53	10.7515	7.89261	8.53627	11.5138	11.5327	10.8417	10.5699	11.2836	11.6228	8.12693	7.54094	7.185	10.4589	9.64729	9.21039	10.1332	9.81839	10.1095
KIF2C	116.296	132.109	96.3963	2.27032	2.08822	3.02043	2.41157	2.11303	1.87464	97.0717	105.134	109.166	3.47047	4.24835	5.84925	5.06661	4.22836	5.30015
RPS8	538.643	520.132	758.684	590.337	548.965	551.594	546.144	507.508	589.709	590.388	575.226	504.665	633.812	606.407	523.858	645.463	713.159	447.634
PLK3	1.23839	1.60605	1.40758	0.378386	0.284757	0.31794	0.05131	0.211303	0.267806	0.620807	1.07728	0.788032	0.332784	0.309775	0.611116	0.471313	0.358336	0.490755
EIF2B3	29.8902	33.5436	40.6381	20.8653	23.1128	26.9295	17.548	19.6089	21.5852	32.5077	40.737	30.4088	23.5802	28.4551	25.6232	23.3889	24.1518	22.4111
HECTD3	51.6183	49.1911	38.1408	42.8117	46.0832	39.1066	45.0502	46.2754	42.0991	48.5359	42.1734	47.4673	32.8506	34.1195	37.2344	35.5252	38.6286	38.8351
UROD	46.4959	45.8873	57.0296	48.4875	49.1681	53.6682	49.5655	49.1491	53.3469	47.4071	51.5896	41.673	48.2537	51.9095	43.1273	48.6631	53.822	44.7568
ZSWIM5	7.20518	8.03027	5.31247	11.0273	10.3462	8.13926	10.8264	9.93125	7.55213	8.52199	6.82275	6.67509	8.79502	8.49669	9.99611	8.48363	8.52839	10.8948
LINC01144	0.956938	1.10129	0.862708	0.702717	0.806812	0.445116	1.18013	0.887473	1.49971	0.507933	1.11718	1.15887	0.618028	0.442536	0.567465	0.648055	0.716671	0.65434
MUTYH	10.4137	12.206	11.7147	5.67579	5.88498	5.62753	5.69541	5.45162	5.57036	9.93292	10.294	11.3569	5.22947	5.00066	5.10719	4.53639	5.08837	4.97298
TOE1	14.6355	15.7393	13.8033	7.67583	7.73591	7.18544	8.97925	8.1563	8.19486	13.5449	16.2788	12.9794	9.69829	8.05416	8.03181	11.3115	9.24506	8.83359
TESK2	20.6023	17.9878	16.9363	25.514	27.1943	23.8137	32.0174	30.7235	30.3156	21.051	19.6703	16.9195	26.2424	26.4637	27.1074	34.3469	30.8169	27.0569
CCDC163	3.65888	3.76276	4.67679	1.89193	1.56617	1.65329	1.64192	1.43686	1.49971	3.32979	4.94749	4.49642	1.61638	1.19485	1.57144	2.41548	1.72001	1.86487
MMACHC	16.3242	20.0527	19.8423	13.0273	11.4378	11.2869	12.6223	13.2276	12.7476	18.9628	16.997	18.9591	12.4081	11.4174	11.4803	11.0759	10.5351	10.7639
PRDX1	315.846	325.432	359.931	324.763	300.419	308.402	360.35	341.086	379.963	373.275	345.407	301.399	338.727	342.169	295.998	378.641	403.844	310.222
AKR1A1	107.402	115.498	143.527	133.57	128.758	133.916	142.847	142.207	152.864	138.892	134.54	119.132	166.107	162.765	141.735	165.666	176.874	141.73
NASP	151.59	157.302	105.795	49.7848	55.1955	50.9657	52.1823	61.4892	53.0791	124.444	125.962	136.051	46.162	49.033	56.3536	52.9049	48.232	52.9688
GPBP1L1	122.826	113.617	105.704	131.3	131.605	137.445	138.64	145.334	144.187	118.687	118.899	113.338	128.455	141.523	135.231	135.444	136.956	146.539
TMEM69	48.5224	46.5297	57.8469	43.7847	43.9475	49.3125	37.1484	36.1328	37.3321	43.5694	49.6345	43.9444	45.4489	49.4755	44.175	39.4135	43.4303	31.8009
IPP	25.1055	30.2856	28.878	24.4329	26.6723	27.1521	24.0644	25.5677	27.7447	26.6947	31.3607	27.8593	23.4851	23.0119	23.397	27.3361	24.5102	25.1594
MAST2	117.703	131.834	107.021	72.8664	76.837	67.2125	67.8831	70.8288	65.7731	109.714	110.56	135.866	72.0716	73.7265	75.08	66.9853	66.5787	73.6459
PIK3R3	93.7236	79.7062	61.5701	168.976	143.755	144.631	215.297	195.455	208.514	88.1547	69.8634	71.3401	108.678	94.7912	114.148	127.726	112.732	141.828
TSPAN1	9.68196	9.03979	10.2163	10.0002	8.82748	10.1105	7.64519	8.36761	9.53389	7.11107	7.50104	5.19174	9.17534	7.9214	7.76991	7.42318	6.66504	6.80513
POMGNT1	75.2603	72.9608	73.1032	76.5421	70.5724	72.9036	61.9312	62.7993	63.5236	71.675	72.2972	70.5984	72.6421	76.2047	71.5879	66.3962	64.2137	66.4809
RAD54L	24.9367	29.2761	22.5212	2.10815	1.80346	2.22558	1.28275	1.35234	1.6604	21.2203	23.9395	28.74	2.75736	2.92074	3.49209	3.7705	3.01002	3.76245
LRRC41	63.6645	68.5556	57.5744	100.002	99.9498	91.2169	96.668	90.9026	87.0905	79.5762	66.2725	71.6646	99.455	97.2252	99.4373	89.6673	92.5939	93.9632
UQCRH	88.5449	92.9676	143.437	75.2989	75.3183	85.1761	74.2969	74.421	88.2688	91.5409	103.578	79.7767	89.2813	98.4643	71.326	97.3261	105.351	67.9859
NSUN4	43.1185	40.8856	41.5008	44.5415	39.4863	43.1762	40.9454	42.3452	45.9555	40.0703	40.7769	36.3422	39.6489	40.0053	38.2821	37.2926	38.5569	38.8351
FAAH	31.016	35.6085	33.1916	25.2438	28.1435	27.0567	26.4247	27.1736	26.9948	30.4196	35.3905	39.7724	27.8113	31.243	30.0756	29.5749	27.1618	29.8052
DMBX1	6.19195	6.69954	5.67571	0.540552	0.711893	0.31794	0.5131	0.422606	0.321367	4.45853	5.34648	6.30426	0.570488	0.575297	0.785721	0.530227	0.50167	0.916076
MKNK1	42.443	41.3444	40.9105	43.7306	44.612	45.9105	41.0993	40.697	37.7071	41.0862	38.383	36.7594	43.4521	40.9788	39.8972	36.35	38.1986	37.1992
MOB3C	8.55615	7.43374	7.76437	9.35154	9.39699	10.5556	10.7238	11.2836	9.90882	8.74774	7.14194	7.88032	10.5065	10.3996	10.9564	11.4883	10.6067	10.5022
ATPAF1	82.2966	87.2776	89.4492	70.9744	74.8912	74.08	69.012	73.0264	74.1287	85.4457	85.9826	79.2204	75.7798	73.1512	75.1673	75.2333	72.8138	75.2491
EFCAB14	171.686	158.357	126.182	227.68	228.233	204.117	229.458	223.517	203.211	173.487	145.592	163.911	202.808	205.425	227.423	202.723	200.883	235.595
CYP4X1	10.6952	10.4164	11.4422	11.5678	10.7733	12.0817	6.77292	6.67718	7.71281	6.49026	7.74043	5.88706	6.98847	7.12483	6.24212	5.8325	5.16003	5.3983
CYP4Z1	0.956938	1.37662	1.18055	3.1352	3.46455	3.40196	3.79694	3.93024	4.23133	1.86242	1.19697	1.437	4.18358	4.9564	5.7183	6.06815	5.2317	5.33287
LINC00853	0.281452	0.780084	0.771897	1.24327	0.996651	1.14458	1.5393	1.05652	0.749856	0.56437	0.598487	0.602613	1.18852	0.973579	0.916674	1.41394	1.57668	1.17781
PDZK1IP1	2.81452	2.34025	2.17947	4.10819	3.70185	4.51474	5.02838	3.88798	4.17777	3.95059	3.75052	3.29119	4.75406	4.82364	4.14686	6.53947	5.73337	6.05264
STIL	60.9626	66.9495	65.021	14.3246	15.8989	17.2641	13.8537	13.1431	9.48033	54.5182	63.1603	62.9035	22.9621	21.8613	27.5875	23.0354	22.0018	24.2433
CMPK1	123.22	124.538	147.75	124.165	120.785	139.925	134.894	136.924	148.364	128.056	139.727	110.464	138.058	139.443	128.771	148.228	152.293	137.706
LINC01389	1.80129	1.46839	1.90704	1.45949	1.28141	1.5897	1.94978	1.77495	2.08889	1.5238	1.95506	1.76148	2.56719	2.25693	1.48414	1.59068	2.00668	2.38834
FOXD2-AS1	3.60259	2.93678	2.63353	1.40543	0.996651	1.93943	1.12882	1.47912	1.44615	2.76541	1.99496	3.15213	1.5213	1.99141	1.9643	1.06045	1.57668	1.14509
FOXD2	16.1554	15.5099	12.8044	19.4058	19.411	16.2467	19.3952	15.3829	15.9612	18.1163	14.0445	19.6081	22.4392	18.0112	20.3414	17.144	17.8451	17.4054
SPATA6	8.72502	8.12205	8.03681	12.3246	13.3361	15.1021	11.5448	10.9878	11.3014	8.80418	6.94245	7.13864	15.3556	15.9756	13.9247	13.8448	13.3301	13.3485
FAF1	83.7039	92.9217	96.7595	54.7038	61.2703	58.946	57.4159	61.4047	61.0062	79.294	95.6781	85.9882	58.8078	61.778	58.4489	60.6226	61.0604	59.8394
CDKN2C	82.5218	83.1477	74.5562	6.2704	8.2105	7.47158	6.82423	5.5784	6.05241	84.0347	82.1124	85.0611	9.69829	11.1962	8.59928	11.2526	11.2517	10.4694
RNF11	96.2004	90.9944	112.243	169.301	154.481	180.272	148.85	149.265	171.074	99.2163	95.1195	84.8757	158.168	153.56	140.95	155.003	153.296	133.256
TTC39A	181.537	179.924	185.755	281.844	296.148	305.763	199.596	202.133	202.783	191.152	182.299	183.38	269.936	300.349	291.895	192.59	204.968	195.648
TTC39A-AS1	6.98002	6.01123	6.03896	7.40556	9.34953	10.1741	6.82423	7.14205	6.85583	7.67544	7.18184	5.3308	8.36715	10.2226	8.51198	6.42164	6.16337	5.79091
EPS15	63.6645	69.7028	76.6902	86.0558	84.5729	93.7286	78.7609	80.422	87.8939	66.8215	74.0528	64.5259	74.7814	83.6836	78.3102	70.5791	69.5171	72.0101
OSBPL9	97.7765	92.2334	108.747	148.327	126.147	159.415	158.958	158.097	182.858	92.6696	99.5084	84.5976	113.765	109.439	116.156	114.883	117.319	116.44
NRDC	215.93	219.203	206.46	206.437	209.249	212.352	200.827	208.176	202.515	218.186	221.759	218.053	200.859	217.684	217.295	206.847	211.418	209.52
RAB3B	2.13904	1.37662	1.08974	1.45949	1.04411	1.33535	1.12882	0.845213	0.803418	1.24161	1.55607	1.34429	0.71311	1.06209	1.83335	1.70851	1.43334	0.948793
TXNDC12	85.3926	84.5702	106.204	54.7038	51.3987	60.3132	65.4203	63.0951	70.6472	76.1336	90.4912	69.8567	62.4684	64.3005	56.179	70.9326	80.9838	60.6246
KTI12	4.1092	5.7818	5.13084	5.13524	5.22055	4.32398	5.28493	4.56415	5.249	5.0229	5.86517	4.54277	4.23112	6.50528	5.631	5.06661	6.0917	4.90755
BTF3L4	122.207	131.421	188.615	122.976	123.442	147.747	116.782	116.808	137.277	131.385	158.759	126.178	144.761	146.922	121.787	132.085	142.833	106.003
ZFYVE9	33.3802	33.6813	22.8845	43.1901	46.6527	40.6009	49.155	49.5295	41.5099	36.2326	29.5254	36.8057	41.0751	45.6255	50.7226	43.184	50.0953	57.7782
CC2D1B	22.4599	27.9453	22.9299	21.7302	24.7739	21.6835	24.167	26.92	24.8524	25.058	22.144	23.6873	18.5884	19.4716	18.8573	22.7408	19.1351	22.313
ORC1	20.8838	24.7332	21.5223	1.35138	1.37633	1.65329	1.69323	0.845213	1.17835	19.0757	23.4208	20.767	1.42622	1.8144	1.57144	1.29611	1.93501	1.734
PRPF38A	71.2074	74.5668	82.9108	57.0823	57.9956	65.0187	60.4945	63.4755	62.6666	71.9572	81.7134	62.4863	60.1389	67.1327	59.7148	67.1032	68.5138	61.9987
TUT4	54.1514	53.9175	46.9041	40.0549	45.2764	41.3322	39.2522	43.9511	38.2962	40.4089	45.6845	54.0034	34.2768	37.1288	43.9567	36.7624	32.3935	40.5036
COA7	56.5719	56.9002	51.7171	43.082	39.249	39.2338	35.9683	34.4424	35.8324	48.423	53.2254	49.1361	37.5571	35.8012	35.4447	31.5191	31.6052	31.6046
ZYG11B	56.1216	58.7357	52.0349	72.4339	70.3351	69.438	69.4224	70.4062	68.8797	58.243	58.8512	60.6321	59.0455	64.743	74.4689	58.0893	58.6237	72.9262
ZYG11A	14.5792	17.6207	18.6617	11.9462	14.2379	14.3709	13.2893	13.2276	16.0148	13.9399	15.441	16.9195	12.9311	11.3289	14.012	14.0216	13.1151	12.0071
ECHDC2	21.2778	18.722	24.7461	28.4871	33.459	31.2535	33.8646	37.1894	40.3851	20.0916	20.588	20.8133	31.6621	31.1103	27.7621	37.5872	37.9119	29.8379
SCP2	126.71	120.546	144.481	216.437	210.625	237.056	231.921	251.62	260.95	157.742	161.751	134.29	244.359	264.902	215.942	275.188	283.228	249.303
CPT2	80.8331	80.3027	73.8297	76.3259	78.4506	71.6636	70.7052	74.3365	68.7726	79.6327	81.6735	80.1011	77.9666	83.8163	83.0245	75.0566	77.8305	77.4411
CZIB	31.2412	31.6163	34.0543	28.7033	30.9436	29.0597	28.3744	26.2016	27.1555	29.1215	30.8021	30.5478	30.426	32.7919	27.4566	29.516	32.3935	25.8791
MAGOH	29.7776	25.5133	28.0607	21.1356	19.8381	21.1112	20.7292	25.1451	24.7453	26.2432	27.0516	21.2769	22.5343	22.1268	20.8216	26.5703	25.3702	24.6032
LRP8	15.4236	20.6493	19.7515	2.97303	3.08487	2.95684	3.12991	2.11303	1.76752	11.231	13.5258	17.5221	3.09014	3.00925	3.31749	2.41548	2.79502	3.17355
NDC1	182.325	204.152	223.124	241.897	227.901	245.958	232.332	238.392	252.809	176.422	190.638	165.07	188.023	186.396	185.779	166.668	200.811	168.918
YIPF1	85.4489	72.9149	86.5433	85.0828	82.8644	81.6469	100.568	104.764	100.106	94.3627	88.6559	75.4193	102.403	105.987	89.7904	117.416	133.802	103.386
DIO1	6.58598	6.14889	7.40113	2.27032	2.04076	2.89325	1.18013	1.52138	1.39259	9.48142	9.41619	6.67509	2.85244	3.93857	2.79367	2.06199	2.86668	2.19204
HSPB11	73.0087	77.6413	107.203	47.028	46.1307	46.1013	45.1015	50.8396	52.8649	93.9112	111.598	78.3397	63.4668	67.6195	52.9052	63.3327	72.8138	46.7199
LRRC42	50.6614	56.4413	54.3506	43.7306	43.1407	47.1505	46.3329	41.4577	46.4375	61.9114	66.5916	56.5992	49.9177	50.6704	46.5758	47.9561	50.9553	47.9304
LDLRAD1	1.01323	0.550647	0.95352	1.24327	2.37298	2.54352	2.36026	3.54989	3.16011	0.846556	1.27677	1.48335	1.94917	1.77014	2.22621	2.76896	2.65168	3.23898
TMEM59	154.911	149.042	206.369	244.167	236.823	271.425	246.75	248.197	284.088	190.757	187.646	156.818	282.011	278.399	245.625	302.112	305.732	256.665
TCEANC2	23.0228	22.9895	25.7904	18.2706	18.177	20.2528	21.1397	20.919	22.8706	21.5025	24.6577	22.3894	18.1605	17.3917	17.8097	20.5021	19.7085	20.7099
CYB5RL	18.801	18.5385	18.9796	8.75694	11.2479	10.1423	11.3908	14.0305	11.7835	13.3191	17.3162	17.7539	9.88845	10.1783	9.42865	11.0759	11.3951	10.7966
MRPL37	132.114	137.111	135.99	91.4073	94.8716	93.7604	88.2532	87.0569	88.6438	135.336	143.078	134.151	106.966	108.51	102.1	101.156	111.872	95.0756
SSBP3	54.3766	42.9505	33.237	46.7577	49.9749	42.2224	61.8286	57.4745	52.5435	49.5517	42.6921	51.3148	46.8275	48.9445	53.2544	53.4351	54.682	62.1623
TTC4	40.8669	40.0137	41.183	34.9196	34.3133	38.1846	33.6081	35.4144	37.9213	38.095	43.7294	33.3755	39.4587	39.961	35.1392	35.702	38.7719	34.5164
PARS2	13.566	11.4718	11.7601	10.2705	10.2987	10.9053	12.417	11.6639	12.2119	11.4567	10.9324	11.9132	11.2671	10.9749	10.1707	10.6635	11.9684	12.8905
TTC22	1.12581	0.917745	0.544868	0.972993	0.759353	0.47691	0.71834	0.464867	0.589173	1.41093	1.19697	1.34429	0.76065	0.885072	0.873023	0.648055	1.00334	0.621623
DHCR24	910.723	909.073	864.479	1439.11	1340.83	1207.63	1498.87	1453.43	1432.6	1189.69	966.955	990.185	1610.3	1564.37	1471.52	1768.66	1940.46	1702.98
TMEM61	0.844357	1.37662	1.18055	0.972993	1.37633	1.27176	0.61572	0.760692	0.749856	0.846556	0.598487	0.788032	0.76065	1.28335	1.35319	0.412399	1.07501	0.883359
USP24	94.7368	84.1572	60.4804	92.3262	92.9733	75.4789	87.9967	84.5635	68.6654	68.6274	62.2426	88.5841	54.2914	54.786	82.5007	51.7266	61.4187	84.966
PLPP3	7.0926	8.85624	6.4022	4.97308	6.35958	5.43677	5.02838	4.90223	5.46324	7.39325	7.86013	6.58239	5.65734	6.63804	5.8056	5.59684	5.0167	5.98721
PRKAA2	13.96	15.051	12.3958	13.4057	15.2345	14.4027	9.59497	8.49439	8.35554	15.7459	17.6753	14.4164	16.3064	17.3474	17.5914	11.1348	10.4634	11.0256
FYB2	2.19533	1.37662	2.67894	3.08114	3.17979	4.03784	0.30786	0.63391	0.321367	2.31392	2.51365	2.54952	5.99012	5.66446	5.19449	0.883712	0.573337	0.458038
OMA1	31.8604	29.2302	34.2359	32.8115	33.3166	36.5631	30.9912	35.5412	34.8148	27.8235	31.8794	27.0712	37.8423	42.5277	35.1828	38.7066	39.7036	34.3856
TACSTD2	337.743	286.841	301.675	571.201	509.478	535.124	527.518	485.406	546.645	366.897	296.57	316.882	526.893	503.341	509.409	525.926	568.105	506.884
MYSM1	25.2744	24.1826	29.8769	24.0005	26.435	25.5306	23.9105	27.2159	27.2091	22.6313	28.4082	28.5082	26.8129	25.1361	25.0558	27.1594	20.7118	28.1039
JUN	113.763	108.477	83.2286	306.763	190.835	254.225	266.607	162.788	248.47	41.199	29.4855	36.7594	107.252	76.6473	104.937	86.8983	75.6088	116.963
LINC01135	1.35097	2.01904	3.04218	1.72977	2.04076	1.78046	1.64192	1.81721	1.60684	1.69311	1.91516	1.76148	1.85408	1.28335	1.13493	2.35656	1.79168	1.96302
FGGY	5.34759	5.46058	4.49516	7.18934	8.25796	8.90231	9.33842	10.5652	9.64101	4.85359	5.66568	4.12558	9.50813	7.65587	7.4207	9.72083	9.96173	8.96445
HOOK1	70.9823	71.5841	52.1257	75.6232	80.7287	72.5857	69.5764	69.7723	68.8797	71.5057	65.4346	77.3662	67.9831	69.8765	84.465	59.6211	60.702	81.04
CYP2J2	5.06614	3.62509	4.22273	8.21639	7.83083	6.89929	6.1572	6.71944	5.99885	6.60313	5.90507	4.77455	8.60486	10.4439	7.94451	7.18752	6.95171	5.72547
NFIA	119.786	128.484	102.481	136.489	140.528	126.635	161.986	159.28	142.098	151.646	124.765	152.971	159.404	147.01	162.339	205.61	204.18	232.814
TM2D1	26.738	24.1367	43.8619	29.406	28.9978	39.9332	22.679	24.5534	28.3874	26.6383	33.7148	29.2962	44.3079	43.5013	41.5996	34.8772	32.7519	29.4126
PATJ	208.5	207.869	163.415	181.896	206.924	186.758	138.434	154.674	140.759	182.179	180.384	231.311	191.256	193.211	224.061	153.825	141.184	199.737
USP1	101.379	106.504	117.283	42.7576	40.7203	46.0059	42.4847	45.8105	45.2592	89.0576	114.032	93.544	45.021	45.5812	48.0163	47.6615	44.2903	48.2248
DOCK7	44.7509	40.9314	29.9224	40.4873	40.6728	35.1959	41.048	39.3024	35.6182	38.5465	32.9567	44.3152	31.3768	33.5885	39.7662	28.2199	31.3185	42.6302
ATG4C	15.9865	17.6207	23.611	16.703	18.3668	22.4783	15.7009	18.8482	16.1219	17.3262	18.7127	14.6945	18.2081	20.3567	19.4684	16.1425	16.3401	13.7739
FOXD3-AS1	3.49001	2.24848	3.45083	2.70276	2.27806	2.25737	3.12991	1.85947	3.10655	1.5238	1.83536	1.437	2.70982	2.43395	1.65874	3.29919	2.15001	1.76672
ALG6	32.367	34.0484	41.7732	26.2708	27.0045	26.8659	25.2958	26.7932	25.87	32.0562	40.8567	29.1108	31.3768	28.6321	27.4566	31.8725	29.6702	24.7668
ITGB3BP	24.2612	22.7142	39.4121	18.9193	18.9364	24.068	19.3439	21.4261	22.5493	18.9064	26.892	18.5419	21.9638	21.0205	18.77	22.5052	24.2235	17.8635
EFCAB7	10.5263	8.81035	9.89844	8.59477	9.49191	11.414	9.08187	12.1288	11.0336	9.42499	10.1344	7.6949	9.88845	11.0634	8.03181	10.8991	11.6817	8.31011
PGM1	24.1486	26.8441	22.2034	26.2708	27.2418	27.7561	25.2958	21.5952	21.1031	22.2926	22.942	23.8727	28.1916	28.9861	27.9367	25.2152	25.2268	25.0612
CACHD1	5.12243	5.00171	3.26921	3.83792	4.17644	3.1476	4.77183	4.01476	3.80284	4.00703	3.83032	5.2381	3.89833	3.76156	4.27781	4.24182	3.44002	4.35136
RAVER2	40.5854	40.7479	38.9581	30.5952	34.0285	31.5396	33.4541	36.4709	31.4404	38.8851	38.3431	38.9381	31.5194	32.1724	31.7344	30.3408	32.5369	32.3898
JAK1	271.995	317.448	265.578	453.955	550.531	564.343	189.95	191.441	192.927	193.692	255.195	300.101	351.04	443.996	561.572	141.924	153.726	186.978
AK4	66.1976	79.0179	69.6523	75.1907	85.1424	85.8119	77.2216	77.2525	75.7891	81.4951	86.4215	89.9747	86.0961	102.314	111.965	76.3527	84.8539	90.7896
DNAJC6	21.9533	20.6493	18.0715	24.3248	25.1536	22.8917	18.9334	18.1298	20.0319	24.6065	25.8945	28.3228	26.0047	27.216	28.1113	20.4432	17.0568	24.8976
LEPROT	78.9755	70.7582	88.4503	121.786	104.648	126.604	126.89	124.373	144.026	95.0964	88.4564	76.5318	124.176	111.254	108.822	132.203	124.772	116.374
LEPR	32.7048	37.3981	47.7214	40.7035	45.4188	46.1331	34.6343	43.6975	41.9384	35.9504	42.9315	34.9052	50.916	55.5825	43.6075	40.6507	49.737	37.4937
MIER1	39.0093	44.3271	58.5733	40.8117	43.9001	53.6364	41.1506	42.0493	46.3304	40.4654	54.0234	41.8121	51.4865	56.0251	45.921	45.6584	48.7336	43.2846
SLC35D1	37.0391	37.1687	31.9656	20.7572	23.1128	22.6373	22.5251	22.2291	21.5852	43.5694	45.884	40.0042	31.1391	34.208	33.2185	32.6973	34.6869	33.5676
SERBP1	415.93	394.401	338.999	345.737	329.274	347.317	334.49	318.434	324.474	379.483	383.111	368.428	323.704	349.515	346.197	313.011	330.027	327.072
GADD45A	2.64565	2.5238	2.49731	2.32437	2.27806	2.41634	3.23253	2.87372	2.78518	3.66841	3.63082	3.61568	3.42293	2.96499	3.18653	4.24182	4.73003	4.94026
GNG12	117.084	112.148	137.761	207.085	173.322	222.749	187.846	178.974	218.369	96.5638	103.059	85.2465	133.684	132.54	118.557	136.681	137.673	130.312
DEPDC1	100.253	110.451	147.932	16.1625	15.3294	22.1922	13.1354	12.805	13.2296	95.943	128.276	93.8222	26.908	23.7199	25.7978	28.1609	24.5818	26.4353
LRRC40	29.7214	31.4328	38.8673	23.8383	22.6857	28.2648	28.1179	28.4414	30.7977	26.2997	34.8319	26.654	24.2457	23.0119	21.8256	30.1051	29.0968	26.6971
SRSF11	134.028	143.581	164.142	127.624	136.873	149.432	130.43	141.615	153.613	127.886	149.622	133.131	130.166	136.876	137.676	134.972	128.141	136.593
ANKRD13C	50.4362	49.4665	52.5798	51.8389	47.4121	57.1338	48.8984	50.3324	54.0432	48.8745	51.829	51.083	49.8701	51.7325	52.425	45.4228	47.9453	53.1324
HHLA3	8.38728	7.06664	7.31032	9.78399	12.1971	9.85613	9.59497	10.3539	10.8194	6.49026	5.42628	5.37716	12.1229	10.7094	9.82151	10.0154	11.1084	8.80087
CTH	5.46017	5.73591	5.13084	9.24343	9.72921	8.33002	7.95305	8.40987	7.65925	9.02993	7.78033	6.99958	11.5999	13.2761	11.1747	10.7813	13.7601	11.5491
PTGER3	169.209	158.128	176.401	249.735	220.592	238.9	282.923	280.822	301.282	191.547	163.786	162.891	197.579	173.032	186.39	202.665	197.873	215.867
ZRANB2	95.0746	92.7382	112.515	81.4611	89.0341	100.342	78.453	90.2687	95.3389	90.2428	107.049	88.0278	88.5207	101.651	91.5801	90.1975	87.6489	80.6801
LRRIQ3	1.40726	2.29436	2.3611	2.27032	2.51536	3.24299	2.10371	2.87372	2.41025	2.03173	1.99496	1.71513	3.0426	2.87648	2.26986	3.29919	2.29335	2.19204
FPGT	32.5359	31.341	48.13	39.9468	37.3507	48.8038	37.8668	41.5	48.7942	33.5236	42.8916	30.9187	45.2111	43.5013	39.8535	44.3034	42.7136	39.3912
ERICH3	0.281452	0.321211	0.272434	0.594607	0.996651	1.0492	0.61572	0.802952	0.428489	0.620807	0.837882	1.39064	1.5213	1.2391	2.26986	1.47285	0.788338	1.3414
CRYZ	53.5885	56.6249	72.6945	53.893	55.765	65.6864	53.8755	58.3619	68.6654	58.3559	66.2725	47.4673	63.8946	68.6373	51.8576	61.2118	64.3571	46.589
TYW3	37.208	36.2509	41.3646	34.1088	32.6047	40.0286	32.7358	36.2174	34.172	35.7246	41.4552	34.7661	35.9407	43.0588	35.1828	32.8741	37.1236	32.8151
SLC44A5	0.168871	0.50476	0.771897	1.18921	0.854272	1.01741	1.12882	0.67617	0.803418	0.507933	0.997478	0.834387	1.71146	1.59313	1.57144	1.35502	1.14667	1.50498
ACADM	47.284	41.2068	47.1765	43.8928	43.5679	52.5237	41.0993	49.0646	50.9367	42.7228	50.632	37.5011	43.4521	51.4669	42.2543	48.6041	44.7203	40.4709
RABGGTB	31.1849	35.1038	52.1257	25.8924	28.713	31.1581	23.7565	27.5962	29.7265	31.4919	42.7719	33.5609	31.044	33.0574	29.2026	28.3377	25.6568	23.2618
PIGK	47.1714	46.392	56.8025	50.974	49.263	63.8105	46.7434	49.1069	51.5259	47.9715	56.976	45.9376	64.7979	62.5304	56.9648	56.911	58.0504	53.6559
USP33	68.7869	69.1521	80.5951	60.9202	65.2569	70.837	55.9792	62.0386	68.6654	63.9432	76.6462	65.7775	59.3307	60.7602	59.5838	56.4397	57.477	54.5065
MIGA1	25.781	23.5402	29.3775	27.8384	28.0011	30.872	29.1954	31.1038	34.2256	23.7036	26.9718	23.5019	24.9588	27.1275	25.9724	24.8618	25.5135	29.1508
FUBP1	215.142	206.034	174.131	186.058	189.696	183.61	161.37	169.676	155.702	190.024	198.897	206.928	173.999	183.298	205.073	151.586	150.716	171.895
DNAJB4	13.8475	12.3896	14.3482	21.0275	16.7532	24.068	20.0622	17.4114	21.2102	13.1498	12.5283	13.7674	16.4015	16.0198	19.5994	17.9688	16.4834	17.8962
ADGRL2	32.9299	33.6813	42.0003	36.0007	37.3981	47.6592	40.5349	44.8385	47.0267	62.758	74.0129	76.2073	62.2782	69.965	79.7943	87.1929	92.8089	104.923
LINC01725	1.01323	0.412985	0.771897	0.972993	1.32887	1.01741	1.23144	1.69043	1.23191	0.620807	0.598487	0.648968	1.2836	0.973579	0.873023	2.29765	2.00668	1.47226
TTLL7	22.4036	23.5861	24.6553	17.4058	16.7058	18.2497	17.0862	19.6935	19.1213	24.7194	26.7324	25.2634	19.4917	19.9141	21.52	19.9719	15.4801	22.9019
PRKACB	30.8472	32.1211	32.4197	54.8119	53.2971	59.4865	50.0273	49.783	50.3475	40.1832	39.6597	34.6734	70.5978	68.5931	67.572	60.2102	59.7704	58.5961
SAMD13	1.57613	1.88138	2.08866	1.62166	1.70854	1.65329	1.43668	1.69043	1.82108	1.63667	2.23435	0.741677	2.37703	2.03567	2.44446	2.35656	2.29335	1.76672
RPF1	43.2311	42.9046	49.129	43.6766	40.6728	49.3125	36.0196	40.9506	39.5817	46.7299	55.6992	43.8517	56.9061	54.963	52.5996	46.7778	49.2353	44.4951
GNG5	73.1213	70.9876	85.0903	65.2986	65.2094	66.2269	73.1681	72.308	84.1982	79.3505	82.8306	75.6511	86.524	77.7978	78.9213	99.6827	114.094	81.4653
CTBS	21.1089	20.1904	27.3342	23.7843	25.0112	28.2648	25.5011	27.4272	29.5122	25.7917	29.0865	21.5086	38.9358	37.173	32.4765	39.4135	39.7752	34.8436
SSX2IP	50.6051	56.6708	54.7139	28.5952	26.7197	28.4874	29.2467	27.723	30.2621	48.423	57.8537	52.1028	28.7621	26.8619	28.7225	27.9842	23.7935	27.5477
MCOLN2	3.71517	4.86405	4.40435	3.40548	3.70185	3.56093	3.12991	2.87372	2.35669	5.47439	5.06719	5.14539	5.27701	5.79722	4.53972	3.7705	3.08169	2.71551
MCOLN3	4.61582	5.18526	8.94492	2.70276	2.80011	3.6881	1.79585	2.45112	1.98176	3.66841	5.30658	4.40371	2.99506	2.07992	2.66272	1.76742	2.15001	1.66857
SYDE2	12.1587	10.8294	8.40005	14.649	14.5226	12.3679	13.3406	13.1853	11.5157	13.1498	12.4485	11.9595	12.0278	10.2226	12.7898	9.48517	11.1084	12.3997
C1orf52	15.4799	15.2346	22.7028	12.0002	12.8141	14.4345	12.8275	12.6359	15.2649	15.5202	19.7102	15.1117	14.6901	12.4353	12.0914	16.1425	15.4084	12.8578
BCL10	21.7281	24.8709	24.2012	27.8384	24.8213	29.4094	31.0939	33.5972	33.5829	26.1868	25.4556	21.2769	28.0965	28.0125	25.4923	32.8741	35.3319	32.0954
DDAH1	131.832	139.681	115.24	163.084	164.685	150.481	134.894	148.081	126.351	153.734	141.921	147.177	165.156	177.457	174.648	141.217	153.941	155.995
CCN1	66.9856	61.7643	50.1279	180.112	135.972	167.745	142.18	119.936	140.384	50.3418	43.2108	46.8647	96.1747	76.3375	106.989	84.4828	83.2772	87.4852
ZNHIT6	40.4728	35.3791	26.8348	38.2711	35.0251	32.3345	34.7882	36.1751	32.2438	32.8464	30.044	35.5542	29.2375	29.1189	34.8336	25.6276	22.2168	34.0257
COL24A1	1.01323	0.734196	0.544868	0.648662	0.664434	0.667674	1.18013	1.3946	1.12478	0.677244	0.997478	0.695322	1.09343	0.531043	0.785721	2.17982	1.21834	0.850642
ODF2L	15.311	15.2805	19.7969	15.7841	18.3668	22.5419	16.4192	20.2428	20.8353	16.2539	18.7925	15.6216	18.5408	20.6664	19.9922	26.6292	18.9201	23.0655
CLCA2	0.619195	0.137662	0.272434	0.216221	0.189838	0.0953819	0.35917	0.422606	0.535612	1.63667	1.07728	1.34429	2.09179	1.90291	1.30953	2.41548	2.50835	2.29019
SH3GLB1	72.7836	67.7296	77.2805	95.1371	89.9833	106.669	81.6855	79.2387	85.1087	76.19	79.2796	74.075	96.8878	96.3844	98.1714	76.4116	82.4888	79.2733
SELENOF	74.4723	78.8343	126.818	81.7314	78.6879	97.8619	86.3034	88.2402	100.267	79.1247	96.5559	67.6317	101.309	97.4022	79.838	99.0935	108.576	81.04
HS2ST1	70.6445	73.9244	71.6048	83.4071	89.5562	91.4713	93.4868	95.2555	98.9811	78.0524	78.0826	74.9558	86.7141	93.0653	92.4968	92.9665	94.9589	101.194
LMO4	136.561	121.739	111.607	136.273	116.086	94.2373	107.648	92.8044	87.144	87.3081	75.569	63.6452	67.6503	59.2113	47.5361	48.722	47.3003	42.2049
PKN2	78.6378	79.5226	84.1368	66.9744	67.6299	73.7938	66.9596	72.0121	69.2546	72.6345	88.0574	72.2208	66.7946	69.7879	71.4569	63.7451	70.0188	74.8565
GTF2B	22.1221	20.6034	28.651	23.2437	21.689	29.3776	26.6299	27.0468	29.4586	22.2926	25.8546	19.7472	32.2801	32.4821	26.278	33.0508	34.9736	29.936
KYAT3	53.6448	54.1929	74.2383	60.8121	61.4127	72.6492	56.8002	60.2637	67.5942	54.9132	65.0755	49.4142	72.0716	71.7794	65.1275	63.5683	70.3054	59.185
RBMXL1	41.8238	40.3349	40.0932	40.7576	38.4422	43.9075	33.4028	31.8645	35.1897	34.8781	40.2582	32.8192	35.4653	37.5271	40.7265	29.3981	30.6735	31.6373
GBP1	0.394033	0.412985	0.181623	1.35138	0.616974	0.699468	2.0524	0.802952	1.23191	1.69311	0.718184	0.648968	1.5213	1.37186	1.22223	1.76742	1.64834	1.17781
GBP2	1.12581	0.642422	1.13514	4.00008	2.13568	2.95684	4.66921	4.35285	4.60626	1.41093	0.718184	0.509903	1.99671	1.2391	1.877	3.24028	2.29335	2.58464
LRRC8B	54.0388	53.3669	52.5798	53.3525	49.8325	51.3791	53.6703	49.2336	53.4541	58.0173	55.1805	53.2617	59.2356	56.7774	58.2743	57.618	57.4054	59.1196
LRRC8C	0.731776	0.688309	0.998925	1.18921	0.806812	0.858437	0.71834	0.802952	0.749856	0.733681	0.997478	1.20523	0.950813	1.19485	1.17858	1.59068	1.72001	1.70128
LRRC8D	21.6155	20.0068	19.7061	27.0276	23.6349	24.0362	30.4781	27.0468	31.0655	24.1551	22.4233	20.3961	30.1408	26.1981	24.5756	29.0447	28.8818	29.5434
ZNF326	28.2015	31.341	23.4293	16.649	17.9397	18.8538	20.8832	23.3701	21.6387	24.1551	29.7648	29.528	17.59	15.7985	18.5081	20.2665	18.5618	21.4951
ZNF644	47.4528	42.5834	47.0403	49.8929	47.7918	51.5698	52.6954	57.9816	58.5959	42.8921	45.8042	45.2423	45.4964	43.6341	46.925	49.7235	43.2153	56.0115
CDC7	19.0262	18.4926	22.612	2.97303	2.89503	3.49734	2.66812	3.84572	2.46381	15.2944	19.9097	17.5685	3.18522	4.02708	3.53574	3.94725	3.87002	3.92604
TGFBR3	1.40726	1.7896	2.04326	2.91898	2.84757	3.59272	0.92358	0.845213	0.803418	0.95943	1.63586	1.80784	1.94917	1.90291	2.13891	0.471313	0.358336	0.458038
BTBD8	8.21841	7.11253	7.71897	6.81095	8.63764	7.69414	6.61899	8.62117	8.94472	7.90119	9.0172	9.31732	6.89339	8.0099	8.73023	8.89603	9.67506	11.8108
GLMN	15.311	17.2077	22.1126	13.676	14.4277	14.7206	14.2642	13.4811	17.3538	17.1569	21.8647	14.6945	16.7818	16.5066	15.0596	16.3781	16.4118	13.8393
RPAP2	21.4467	21.6129	27.4704	20.4329	22.7331	24.0045	20.5753	23.0321	23.6205	20.7688	24.6178	22.1113	21.3933	21.109	22.9169	21.6804	22.1451	20.0882
EVI5	16.4368	15.1428	15.9374	23.4059	25.0112	27.8833	22.8843	24.2999	25.7094	19.6401	18.1142	17.8466	21.8212	25.4016	24.401	22.7998	23.2201	26.5335
RPL5	581.762	576.895	828.2	540.281	542.083	564.947	540.551	536.457	580.817	606.303	651.712	522.002	617.886	638.757	508.012	646.347	719.896	464.745
DIPK1A	6.19195	6.74543	6.08436	6.97312	6.50196	6.77212	6.05458	5.74745	5.46324	7.73187	7.34144	6.81416	9.50813	8.67371	8.64293	7.65883	7.52505	6.57611
MTF2	39.8536	37.031	46.3138	37.0278	35.5947	42.7947	37.405	38.6685	40.278	38.4901	47.6795	37.7328	39.8391	41.4214	38.5876	44.2445	41.5669	40.8962
TMED5	130.144	136.102	165.64	96.2182	99.2854	115.094	106.776	114.019	113.603	140.246	163.626	133.595	121.181	132.23	113.886	123.366	129.574	118.272
CCDC18	12.215	14.5004	16.4823	1.83788	2.37298	3.05222	1.43668	1.31008	1.44615	10.0458	15.2814	12.8866	1.71146	2.92074	3.6667	2.23874	1.86334	1.50498
CCDC18-AS1	4.05291	6.10301	10.3525	6.16229	8.16304	7.12185	5.84934	8.70569	7.12364	4.74071	6.30406	5.00632	7.65404	6.59379	5.06353	9.54409	6.52171	4.25321
DR1	85.3926	92.6464	102.571	94.056	92.641	105.397	86.8165	89.2122	97.4813	90.7508	100.865	90.7164	102.735	104.66	100.834	94.8517	100.836	100.31
FNBP1L	153.504	139.36	108.928	248.438	249.21	245.418	250.034	255.127	255.165	171.794	159.317	166.089	207.658	229.278	249.292	205.139	205.398	240.47
BCAR3	56.6282	60.9383	51.1268	92.9208	94.3021	91.0897	84.1997	79.5345	81.8415	69.3611	60.7664	65.9629	90.7551	98.3758	104.414	84.8363	88.1505	95.8935
DNTTIP2	78.8629	81.817	95.1249	69.4609	68.9587	78.4993	66.9082	79.5768	83.1805	79.9148	94.8801	70.5057	80.3912	81.0284	67.0482	83.717	76.6838	71.7156
GCLM	21.0526	23.9073	22.4758	18.3788	16.6583	18.9174	13.6485	12.6359	13.8188	23.5342	26.3733	22.3894	18.731	18.0555	15.4089	16.9673	13.1151	16.3912
ABCA4	1.01323	1.28484	1.63461	3.08114	3.51201	3.43375	2.00109	1.14104	1.55327	1.24161	1.03738	1.11252	2.56719	2.74372	2.83733	1.70851	1.07501	1.47226
ARHGAP29	106.22	118.848	137.534	133.246	123.964	153.183	118.321	115.921	135.885	82.2288	88.9352	76.2537	98.3616	86.1618	98.6516	84.1294	81.2705	89.0556
ABCD3	78.3563	86.2222	93.3087	95.2993	96.77	110.516	82.1986	80.9291	88.4295	91.0329	99.7877	85.0611	98.4091	100.677	96.3381	84.7185	84.0655	90.1026
F3	1.51984	1.65194	1.63461	1.62166	1.42379	1.27176	1.43668	2.70468	2.8923	1.46736	1.63586	1.15887	1.71146	0.929326	1.74605	3.24028	3.08169	2.19204
SLC44A3	6.52969	5.73591	5.85733	8.3245	8.35288	7.24903	8.51746	7.01527	7.98062	6.37739	6.58336	6.16519	8.46223	7.56737	7.33339	8.48363	7.66838	7.98294
CNN3	262.032	254.491	310.166	295.466	277.259	315.587	394.42	411.112	472.731	231.674	225.949	200.716	262.377	248.838	237.506	347.652	363.782	311.76
ALG14	13.8475	11.8848	17.1634	12.9732	11.0106	14.2119	11.6987	11.6217	14.4615	13.7706	14.244	10.847	13.9769	14.0284	13.6628	13.5502	16.0534	11.68
TLCD4	61.4129	68.6473	88.7681	48.7037	46.2731	54.3995	47.2565	50.8818	54.2039	65.6363	78.1624	62.3472	52.6275	54.2549	46.5321	56.7343	62.0637	53.8522
RWDD3	11.2018	10.6	15.8466	10.0002	11.3428	11.732	10.7238	11.833	12.9082	10.328	12.5682	9.87358	11.3622	10.7094	11.5676	13.02	12.9001	9.16076
PTBP2	8.16212	8.35148	10.5795	6.00012	6.64434	6.99468	5.43886	7.05753	7.87349	7.95762	8.89751	7.97303	7.22618	6.72655	7.508	5.65575	5.8767	6.24894
PALMD	10.3012	7.5714	9.5806	16.4328	15.0447	18.9492	16.3679	15.2984	15.1578	11.9647	9.0172	8.29751	16.354	18.1882	14.9723	18.7347	16.4834	17.9289
FRRS1	7.88066	10.6917	11.7147	8.05422	8.54272	9.22025	7.49126	9.38186	9.1054	9.87648	11.7303	8.76106	9.22288	11.2404	9.82151	10.6045	11.6101	8.67
AGL	74.9789	70.2993	54.8955	80.0557	81.0135	74.3025	68.9606	71.0824	60.2028	60.2748	64.5967	69.8567	65.2258	71.7351	83.8539	52.5514	61.8487	77.7356
SLC35A3	52.519	55.1106	72.1042	65.9473	62.9788	77.1004	61.2128	69.8146	68.6654	62.5887	69.8235	61.8373	83.2437	86.5158	74.9927	83.717	81.7722	75.3799
MFSD14A	67.3797	66.766	86.0892	75.7853	75.4132	84.4448	67.9858	71.336	78.1993	72.578	78.0826	65.0358	84.6223	86.3388	78.9213	79.4751	83.5639	74.1367
SASS6	26.2876	30.2856	27.8337	16.4868	17.9872	20.5707	15.6496	16.0168	15.1578	21.954	29.1663	25.3561	16.5917	20.6664	19.8176	15.4944	14.3334	17.2419
TRMT13	15.9302	15.2805	22.0218	11.784	13.7158	15.2611	12.9301	16.1436	16.0684	13.5449	17.2763	13.9992	14.1671	14.7365	11.5676	15.2588	13.9751	13.3158
DBT	75.0915	74.6586	75.9637	95.6236	100.852	101.614	92.7685	103.074	97.6956	82.1723	84.6261	75.5584	98.314	99.5706	93.6317	91.258	92.1639	97.8565
RTCA-AS1	1.1821	1.23896	1.40758	2.37843	2.51536	2.86146	2.66812	2.66242	3.37435	0.846556	1.23687	1.62242	2.70982	2.21268	2.35716	2.53331	2.79502	2.84638
RTCA	18.6884	21.7965	20.2055	19.1896	19.3635	20.4117	16.1113	16.4394	17.7288	23.3649	24.0991	20.8597	19.0163	22.2153	18.7263	19.3827	14.4768	16.7184
CDC14A	9.73825	9.54455	8.85411	7.24339	7.64099	8.80693	4.87445	4.35285	5.30256	7.50613	9.41619	9.22461	8.50977	8.45244	8.20642	5.71467	5.8767	7.03415
EXTL2	18.1255	19.0432	26.8348	16.4328	19.1262	19.6805	16.6758	18.2143	19.0678	15.7459	18.4334	14.9263	16.4966	16.3296	14.4049	13.6092	12.8284	11.3528
SLC30A7	35.9696	36.0674	42.6814	49.1902	46.368	51.697	48.5906	46.4444	50.5618	44.5288	40.9764	40.236	55.0521	50.7146	50.3734	52.9049	53.9653	54.5719
DPH5	30.3406	27.7618	40.2749	26.3789	23.8722	30.2997	23.2947	26.0748	27.6911	26.6383	31.7996	22.7139	30.4735	30.181	23.1351	31.2245	30.3152	23.0655
RNPC3	7.48663	7.9385	9.85304	3.56764	6.26466	5.94547	5.38755	6.84622	7.07008	6.5467	7.74043	7.185	6.0852	6.6823	5.631	7.18752	7.02338	5.72547
PRMT6	47.0025	51.8067	47.1311	65.4608	58.66	62.1254	56.5949	53.4175	51.5794	52.0349	52.1881	47.7918	62.4209	60.716	55.6989	55.0258	54.7537	54.0485
VAV3	347.594	301.663	388.854	440.171	415.793	489.246	470.923	473.953	522.65	333.091	316.999	267.838	459.147	462.716	429.091	541.421	521.02	459.216
FAM102B	51.8435	57.4509	61.7972	24.9194	24.5366	27.629	31.7096	34.6537	36.4752	52.0349	62.2027	49.507	20.9654	22.3923	21.4327	27.0416	27.5918	26.5662
[truncated: 11,846 more rows]
